# Supplementary material for: Switchable electrooxidativeN-methyl amines: access to C3-aminomethylated and C3-arylmethylated imidazo[1,2-a] pyridines
Source: Royal Society of Chemistry journal article supplement (doi:10.1039/d2gc03464f), 2022-01-01

## Electronic Supplementary Information

### Switchable Electrooxidative *N*-Methyl Amines: Access to C3-Aminomethylated and C3-Arylmethylated Imidazo[1,2-*a*]pyridines

Sifeng Li,<sup>a\*</sup> Taimin Wang,<sup>a\*</sup> Xingchen Li,<sup>a</sup> Lijing Fang,<sup>b</sup> Hongbin Zhai,<sup>a,c</sup> and Bin Cheng<sup>a\*</sup>

<sup>a</sup>Institute of Marine Biomedicine/Postdoctoral Innovation Practice Base, Shenzhen Polytechnic, No. 7098 Liuxian Avenue, Nanshan District, Shenzhen 518055

<sup>b</sup>Institute of Biomedicine and Biotechnology, Shenzhen Institute of Advanced Technology, Chinese Academy of Sciences, No. 1068 Xueyuan Avenue, Nanshan District, Shenzhen 518055, China

<sup>c</sup>Laboratory of Chemical Genomics, School of Chemical Biology and Biotechnology, Shenzhen Graduate School of Peking University, No. 2199 Lishui Road, Nanshan District, Shenzhen 518055, China

#### Contents

|                                                                                                              |     |
|--------------------------------------------------------------------------------------------------------------|-----|
| 1. General information .....                                                                                 | S1  |
| 2. Typical procedure for electrochemical oxidative C3 aminomethylation.....                                  | S1  |
| 2.1 Gram-scale C3-aminomethylation reaction of 2-phenylimidazo[1,2- <i>a</i> ]pyridine .....                 | S2  |
| 3. Typical procedure for electrochemical C3 <i>para</i> -selective arylmethylation .....                     | S2  |
| 4. Procedure for cyclic voltammetry (CV).....                                                                | S5  |
| 5. The optimization of reaction conditions.....                                                              | S7  |
| 6. Deuterium-labeling experiments.....                                                                       | S14 |
| 7. Free radical trap experiments and proposed mechanisms for <b>3aa</b> .....                                | S20 |
| 8. Characterization data ( <sup>1</sup> H-NMR, <sup>13</sup> C-NMR and <sup>19</sup> F-NMR) of products..... | S21 |
| 9. References.....                                                                                           | S46 |
| 10. Crystal data and structure refinement of <b>3aa</b> , <b>3la</b> and <b>4ha</b> .....                    | S47 |
| 10.1 X-ray structure of <b>3aa</b> .....                                                                     | S47 |
| 10.2 X-ray structure of <b>3la</b> .....                                                                     | S48 |
| 10.3 X-ray structure of <b>4ha</b> .....                                                                     | S50 |
| 11. NMR spectra of C3 methylated imidazo[1,2- <i>a</i> ]pyridines .....                                      | S52 |

## 1. General information

All the  $^1\text{H}$  NMR,  $^{13}\text{C}$  NMR and  $^{19}\text{F}$  NMR spectra of isolated compounds were recorded on JEOL 400 MHz spectrometer in  $\text{CDCl}_3$ . Chemical shifts ( $\delta$ ) were reported in ppm with tetramethylsilane as internal standard, and  $J$  values were given in Hz,  $\delta$  values relative to internal  $\text{CHCl}_3$  ( $\delta$  7.26 for  $^1\text{H}$  NMR and 77.16 for  $^{13}\text{C}$  NMR in  $\text{CDCl}_3$ ).  $^{19}\text{F}$  NMR chemical shifts were determined as  $\delta$  values relative to external standard  $\text{PhCF}_3$  at  $-63.0$ . High-resolution mass spectra (HRMS) were obtained on a 4G mass spectrometer by using electrospray ionization (ESI) analyzed by a quadrupole time-of-flight (QToF) instrument. Cyclic voltammetry was performed on CHI660E using the cyclic voltammetry mode. All melting points were measured with the samples after column chromatography and uncorrected. All reactions were monitored by thin layer chromatography (TLC), and column chromatography was carried out on 200-300 mesh of silica gel purchased from Qing Dao Hai Yang Chemical Industry Co. All the electrodes, cables and power supplies were purchased from online shopping platforms. Unless otherwise stated, all commercially available reagents and solvents were used directly without further purification. imidazo[1,2-*a*]pyridines **1**<sup>1-3</sup> were all known and prepared according to the previous reported protocols

## 2. Typical procedure for electrochemical oxidative C3 aminomethylation

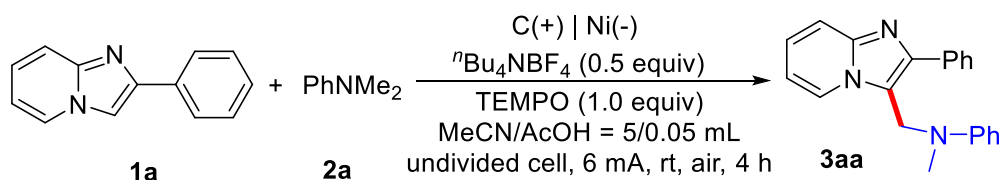

Imidazo[1,2-*a*]pyridine **1a** (0.2 mmol, 38.8 mg), *N,N*-dimethylaniline **2a** (1.0 mmol, 121 mg, 5.0 equiv.),  $t\text{Bu}_4\text{BF}_4$  (0.1 mmol, 33.0 mg, 0.5 equiv.), TEMPO (0.2 mmol, 31.2 mg, 1.0 equiv.), acetic acid (50  $\mu\text{L}$ ) and MeCN (5.0 mL) were added into a 10 mL tube equipped with a stir bar. The tube was equipped with a graphite plate (20.0 mm  $\times$  15.0 mm  $\times$  2.0 mm) anode and a nickel plate (20.0 mm  $\times$  10.0 mm  $\times$  0.2 mm) cathode, and the two electrodes were then submerged into the solution for 10 mm. The reaction mixture was then stirred and electrolyzed at a constant current of 6 mA at room temperature 4 h. After the completion of reaction as monitored by TLC, the resulting mixture was allowed to poured to saturated  $\text{NaHCO}_3$  (5 mL) before extracted by ethyl acetate (3  $\times$  10 mL). The organic phase was washed by saturated brine and then dried over  $\text{Na}_2\text{SO}_4$  before concentrated

and dried under vacuum. The residue was then purified by silica gel column by using petroleum ether and ethyl acetate (petroleum ether/ethyl acetate = 5:1 to 3:1) as a mixed eluent to provide the desired products **3aa** (61 mg, 98%).

### 2.1 Gram-scale C3-aminomethylation reaction of 2-phenylimidazo[1,2-*a*]pyridine

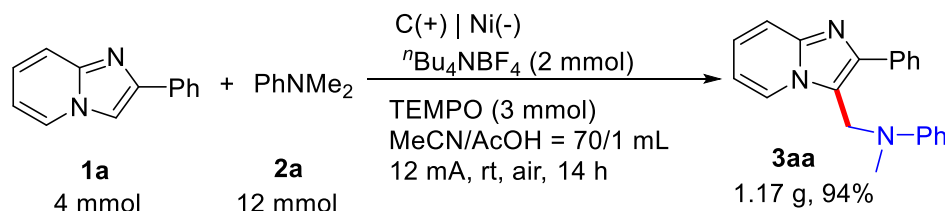

Imidazo[1,2-*a*]pyridine **1a** (4 mmol, 776 mg), *N,N*-dimethylaniline **2a** (12 mmol, 1.45 g, 3.0 equiv.),  $t\text{Bu}_4\text{BF}_4$  (3 mmol, 16.5 mg, 0.25 equiv.), TEMPO (3 mmol, 468 mg, 0.75 equiv.), acetic acid (1.0 mL) and MeCN (70 mL) were added into a 150 mL conical flask and a stir bar was added. The tube was equipped with a graphite plate (20.0 mm × 15.0 mm × 2.0 mm) anode and a nickel plate (20.0 mm × 10.0 mm × 0.2 mm) cathode, and the two electrodes were then submerged into the solution for 10 mm. The reaction mixture was then stirred and electrolyzed at a constant current of 12 mA at room temperature 14 h. After the completion of reaction as monitored by TLC, the resulting mixture was allowed to poured to saturated  $\text{NaHCO}_3$  (30 mL) before extracted by ethyl acetate (3 × 50 mL). The organic phase was washed by saturated brine and then dried over  $\text{Na}_2\text{SO}_4$  before concentrated and dried under vacuum. The residue was then purified by silica gel column by using petroleum ether and ethyl acetate (petroleum ether/ethyl acetate = 5:1 to 3:1) as a mixed eluent to provide the desired products **3aa** (1.17 g, 94%).

### 3. Typical procedure for electrochemical C3 *para*-selective arylmethylation

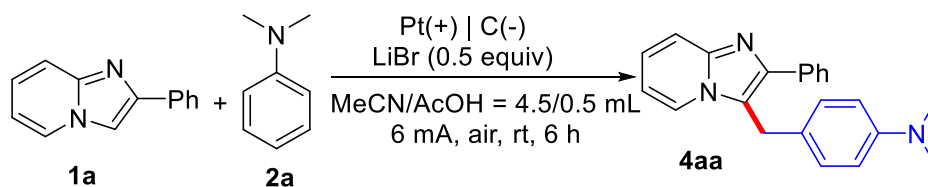

Imidazo[1,2-*a*]pyridine **1a** (0.2 mmol, 38.8 mg), *N,N*-dimethylaniline **2a** (1.0 mmol, 121 mg, 5.0 equiv.), LiBr (0.1 mmol, 8.7 mg, 0.5 equiv.), acetic acid (0.5 mL) and MeCN (4.5 mL) were added into a 10 mL tube equipped with a stir bar. The tube was equipped with a Pt plate (10.0 mm × 10.0 mm × 0.1 mm) anode and a graphite plate (20.0 mm × 15.0 mm × 2.0 mm) cathode, and the two

electrodes were then submerged into the solution for 10 mm. The reaction mixture was then stirred and electrolyzed at a constant current of 6 mA at room temperature 6 h. After the completion of reaction as monitored by TLC, the resulting mixture was allowed to poured to saturated  $\text{NaHCO}_3$  (5 mL) before extracted by ethyl acetate ( $3 \times 10$  mL). The organic phase was washed by saturated brine and then dried over  $\text{Na}_2\text{SO}_4$  before concentrated and dried under vacuum. The residue was then purified by silica gel column by using petroleum ether and ethyl acetate (petroleum ether/ethyl acetate = 10:1 to 5:1) as a mixed eluent to provide the desired products **4aa** (43 mg, 66%).

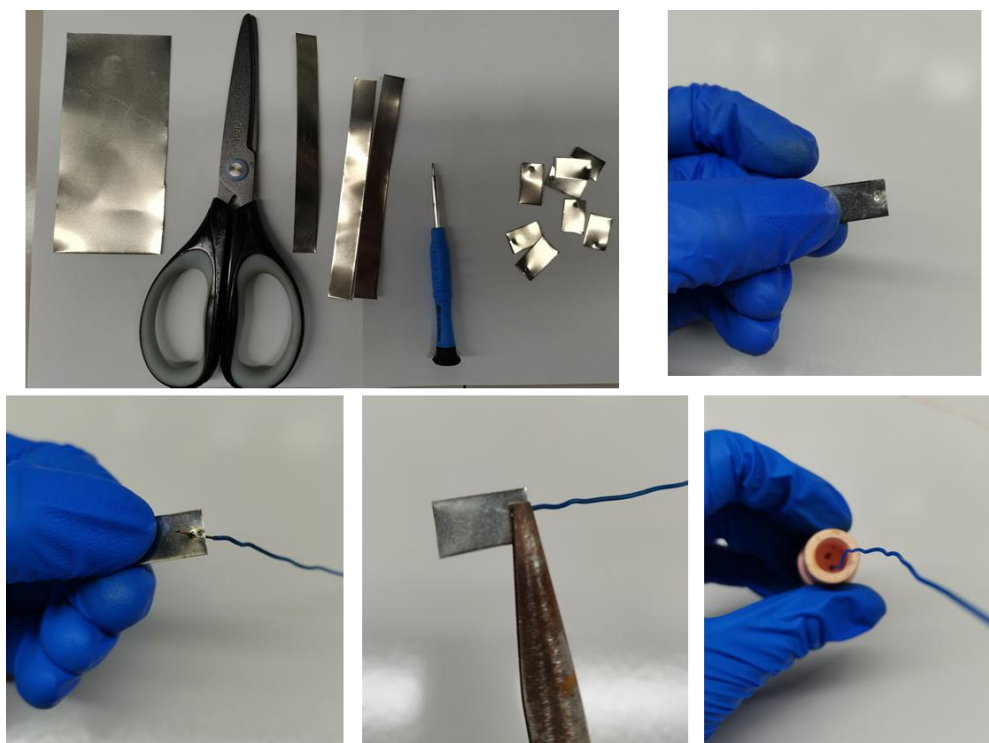

**The preparation of nickel cathode**

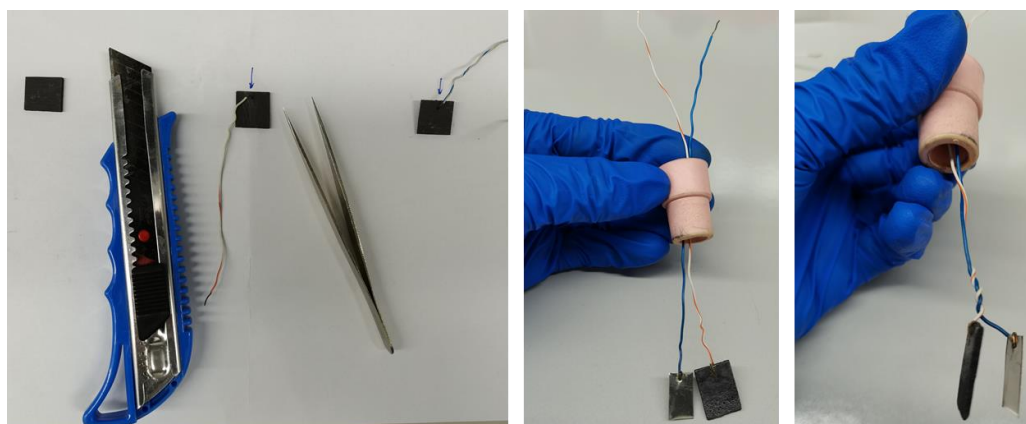

**The preparation of C(+) | Ni(-) electrodes**

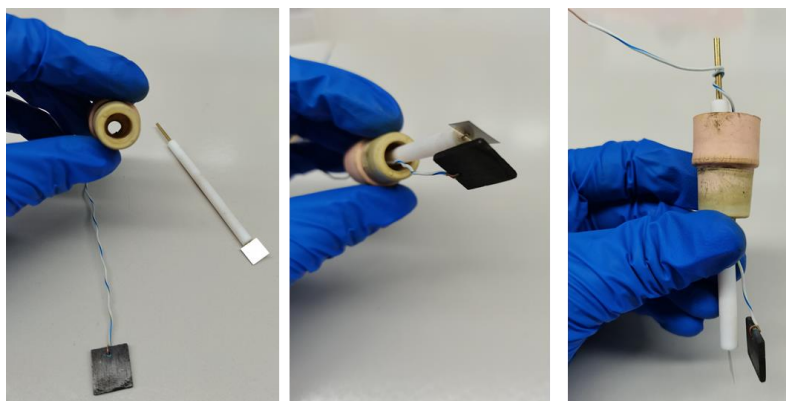

The preparation of Pt(+) | C(-) electrodes

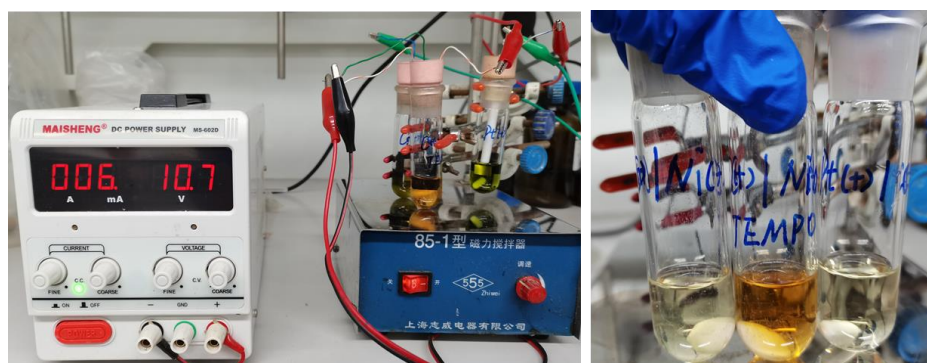

Reaction setup (5 min)

0 h

C(+) | Ni(-) for methylation without TEMPO (left); C(+) | Ni(-) for methylation in standard conditions (middle); Pt(+) | C(-) for alkylation (right).

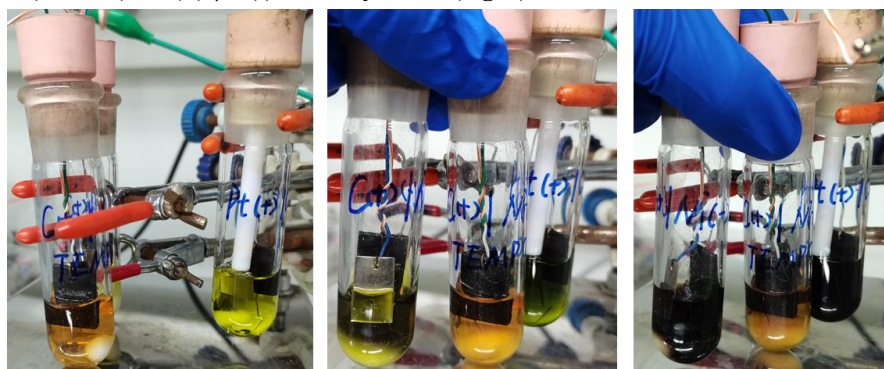

1 min

5 min

30 min

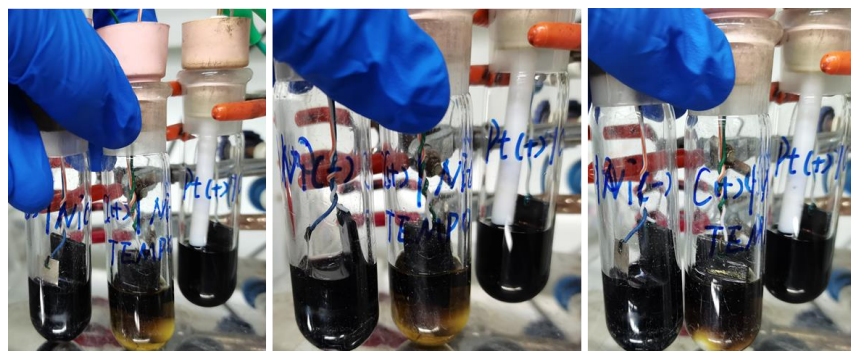

2 h

4 h

6 h

The reaction processes

#### 4. Procedure for cyclic voltammetry (CV)

Cyclic voltammetry was performed on CHI660E using the cyclic voltammetry mode. A glassy carbon disc (diameter 3 mm) working electrode, a platinum plate (10 x 10 x 1 mm) counter electrode and an Ag wire (in saturated aqueous KCl solution) reference electrode were used at a scan rate of 50 mV/s. The experiments were conducted in a 10 mL tube without stirring in CH<sub>3</sub>CN (5 mL) or mixed solvent (CH<sub>3</sub>CN/AcOH = 4.5/0.5 mL) using <sup>t</sup>Bu<sub>4</sub>NBF<sub>4</sub> (0.1 mmol, 0.02 M) as electrolyte.

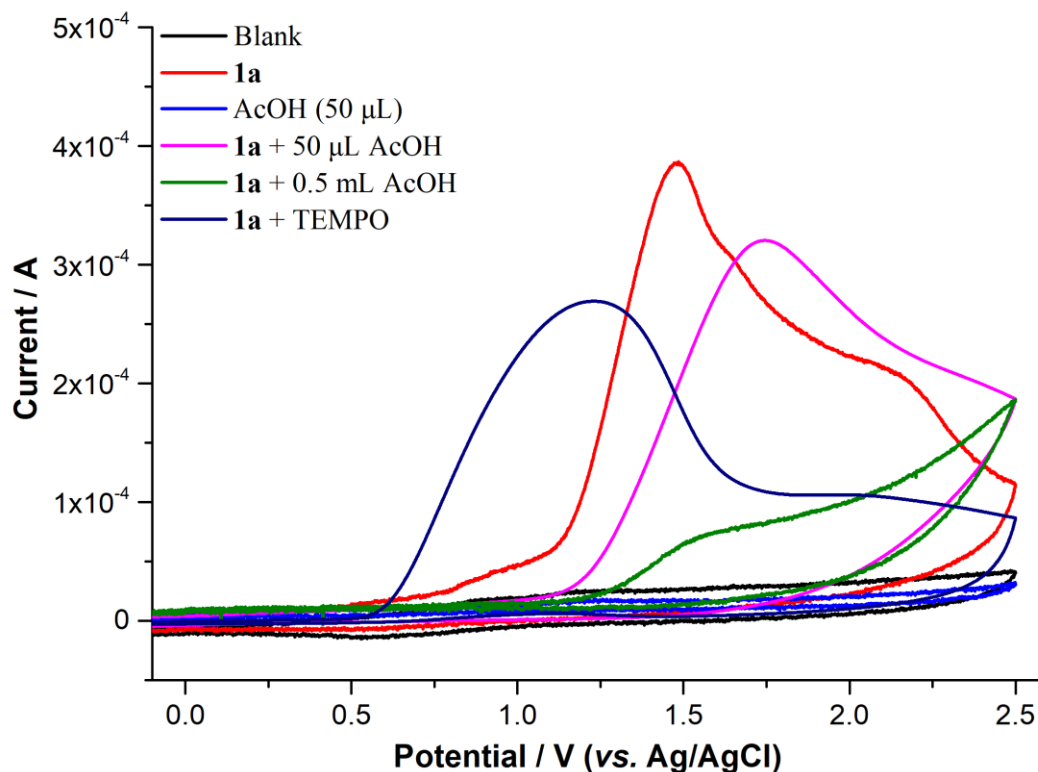

Cyclic voltammetry curves: (**1a**) 0.04 M **1a** in CH<sub>3</sub>CN; (AcOH) 50 μL acetic acid in CH<sub>3</sub>CN; (**1a** + 50 μL AcOH) 0.04 M **1a** and 50 μL AcOH in MeCN; (**1a** + 0.5 mL AcOH) 0.04 M **1a** in mixed solvent; (**1a** + TEMPO) 0.04 M **1a** and 0.02 M TEMPO in CH<sub>3</sub>CN.

Figure S1 Cyclic voltammetry experiments of **1a**

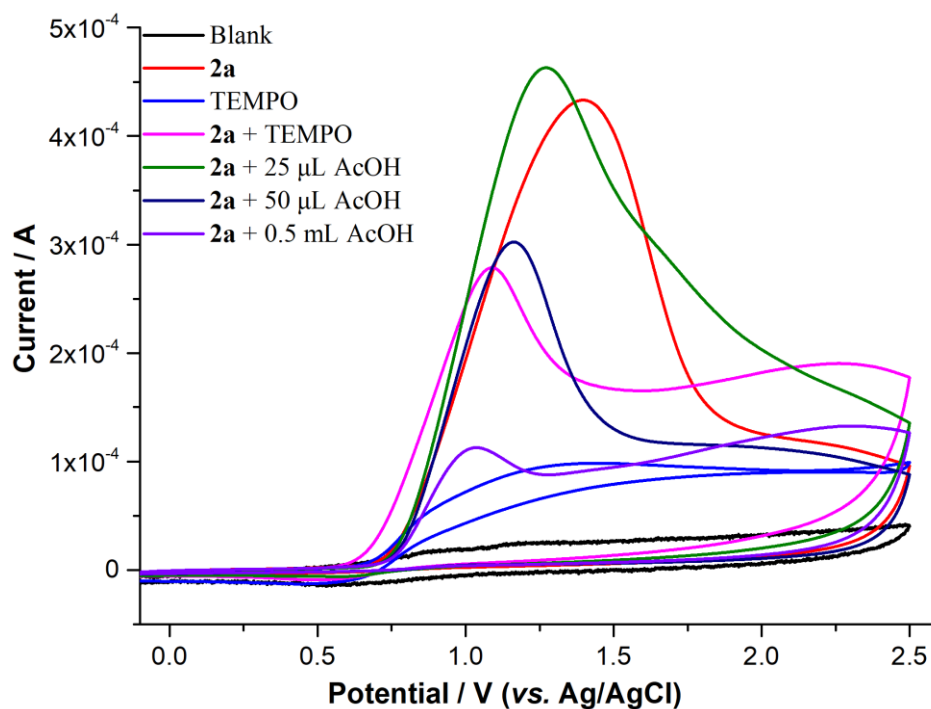

Cyclic voltammetry curves: (**2a**) 0.2 M **2a** in CH<sub>3</sub>CN; (TEMPO) 0.04 M TEMPO in CH<sub>3</sub>CN; (**2a** + TEMPO) 0.2 M **2a** and 0.04 M TEMPO in CH<sub>3</sub>CN; (**2a** + 50 μL AcOH) 0.2 M **2a** and 25 μL AcOH in MeCN; (**2a** + 25 μL AcOH) 0.2 M **2a** and 50 μL AcOH in MeCN; (**2a** + 0.5 mL AcOH) 0.2 M **2a** in mixed solvent.

Figure S2 Cyclic voltammetry experiments of **2a**

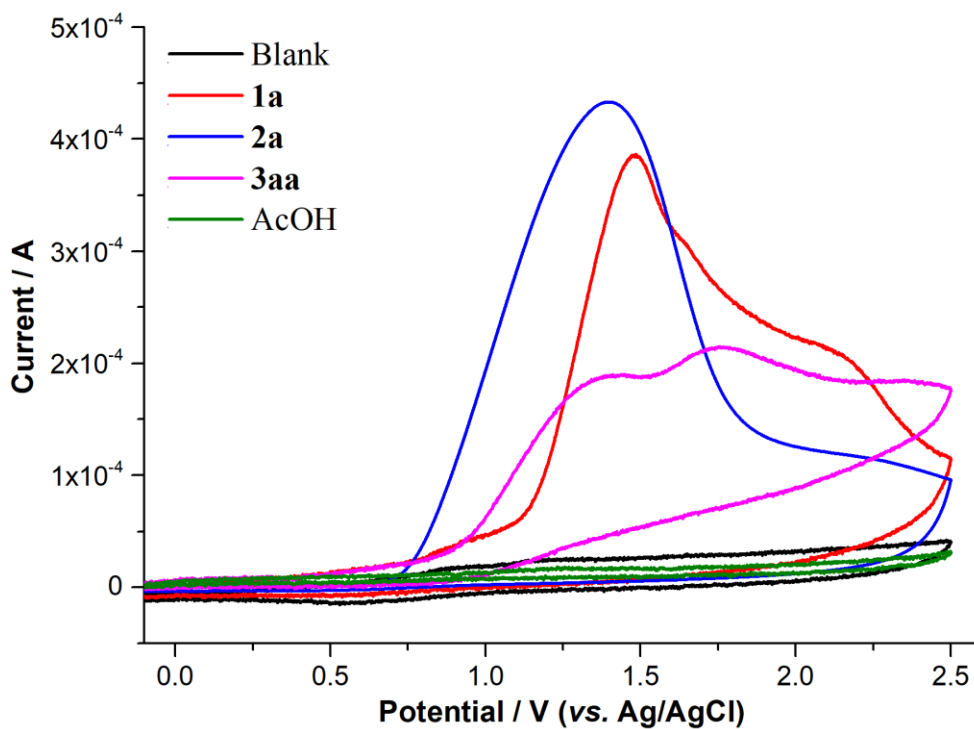

Cyclic voltammetry curves: (**1a**) 0.04 M **1a** in CH<sub>3</sub>CN; (**2a**) 0.2 M **2a** in MeCN; (**3aa**) 0.04 M **3aa** in CH<sub>3</sub>CN; (**3aa** + AcOH) 0.04 M **3aa** in mixed solvent; (AcOH) 0.5 mL AcOH in 4.5 mL CH<sub>3</sub>CN.

Figure S3 Cyclic voltammetry experiments of coupling partners

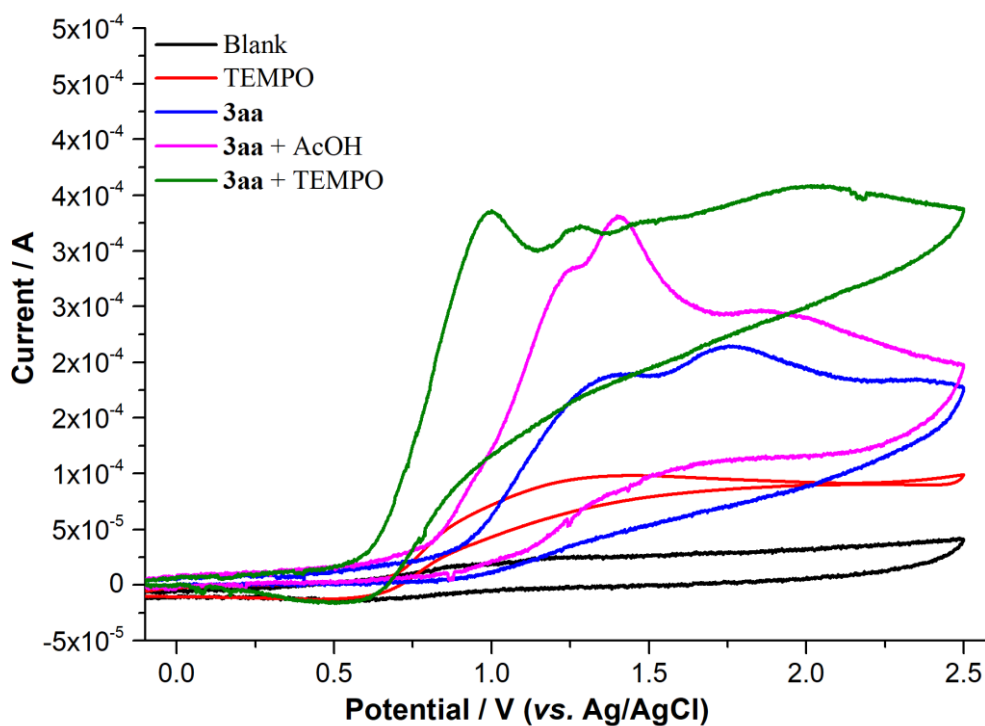

Cyclic voltammetry curves: (TEMPO) 0.04 M TEMPO in CH<sub>3</sub>CN; (**3aa**) 0.04 M **3aa** in CH<sub>3</sub>CN; (**3aa** + AcOH) 0.04 M **3aa** in mixed solvent; (**3aa** + TEMPO) 0.04 M **3aa** and 0.04 M TEMPO in CH<sub>3</sub>CN.

Figure S4 Cyclic voltammetry experiments of **3aa**

## 5. The optimization of reaction conditions

Table S1 Optimization of reaction conditions for the aminomethylation

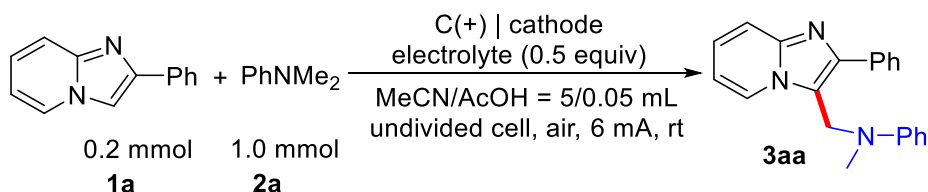

| entry            | electrolyte                                    | cathode | time (h) | yield (%) <sup>[b]</sup> |
|------------------|------------------------------------------------|---------|----------|--------------------------|
| 1                | none                                           | Ni      | 12       | 41                       |
| 2                | <sup>t</sup> Bu <sub>4</sub> NBF <sub>4</sub>  | Ni      | 8        | 63                       |
| 3 <sup>[c]</sup> | <sup>t</sup> Bu <sub>4</sub> NBF <sub>4</sub>  | Ni      | 6        | 56                       |
| 4                | <sup>t</sup> Bu <sub>4</sub> NPF <sub>6</sub>  | Ni      | 12       | 46                       |
| 5                | <sup>t</sup> Bu <sub>4</sub> NClO <sub>4</sub> | Ni      | 12       | 34                       |
| 6                | <sup>t</sup> Bu <sub>4</sub> NI                | Ni      | 12       | 37                       |
| 7                | <sup>t</sup> Bu <sub>4</sub> NBr               | Ni      | 12       | 45                       |
| 8                | <sup>t</sup> Bu <sub>4</sub> NHSO <sub>4</sub> | Ni      | 12       | N.R.                     |
| 9                | Et <sub>4</sub> NBF <sub>4</sub>               | Ni      | 12       | 46                       |



|                          |                                               |          |    |       |
|--------------------------|-----------------------------------------------|----------|----|-------|
| <b>10</b> <sup>[d]</sup> | CAN                                           | Ni       | 12 | 39    |
| <b>11</b> <sup>[d]</sup> | <sup>n</sup> Bu <sub>4</sub> NBF <sub>4</sub> | Fe       | 12 | 42    |
| <b>12</b> <sup>[d]</sup> | <sup>n</sup> Bu <sub>4</sub> NBF <sub>4</sub> | Al       | 12 | 27    |
| <b>13</b>                | <sup>n</sup> Bu <sub>4</sub> NBF <sub>4</sub> | Graphite | 12 | 44    |
| <b>14</b>                | <sup>n</sup> Bu <sub>4</sub> NBF <sub>4</sub> | Pt       | 12 | 10    |
| <b>15</b> <sup>[e]</sup> | <sup>n</sup> Bu <sub>4</sub> NBF <sub>4</sub> | Ni       | 8  | 62    |
| <b>16</b> <sup>[f]</sup> | <sup>n</sup> Bu <sub>4</sub> NBF <sub>4</sub> | Ni       | 24 | trace |
| <b>17</b> <sup>[g]</sup> | <sup>n</sup> Bu <sub>4</sub> NBF <sub>4</sub> | Ni       | 4  | 98    |
| <b>18</b> <sup>[h]</sup> | <sup>n</sup> Bu <sub>4</sub> NBF <sub>4</sub> | Ni       | 4  | 87    |

[a] Reaction conditions: graphite anode, cathode, 2-phenyl imidazo[1,2-*a*]pyridine **1a** (0.2 mmol), *N,N*-dimethylaniline **2a** (1.0 mmol), electrolyte (0.1 mmol) and AcOH (50  $\mu$ L) were dissolved in 5 mL solvent, the mixture was stirred under air at room temperature for specific time, constant current = 6 mA. [b] Yield was determined by <sup>1</sup>H NMR with 3-Methylanisole as the standard. [c] 0.2 mmol <sup>n</sup>Bu<sub>4</sub>BF<sub>4</sub> was used. [d] An unexpected product **4aa** was isolated. [e] The reaction was conducted under N<sub>2</sub>. [f] 0.2 mmol 2,6-Di-*tert*-butyl-4-methylphenol (BHT) was added. [g] 0.2 mmol TEMPO was added. [h] 0.05 mmol TEMPO was added. CAN = Diammonium cerium(IV) nitrate. TEMPO = 2,2,6,6-tetramethylpiperidinyl-1-oxide.

Table S2 Optimization of reaction conditions for arylmethylation

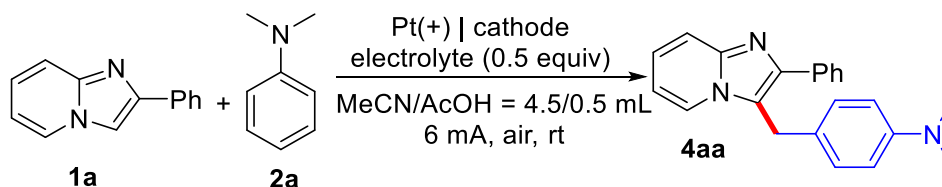

| entry                   | electrolyte                                    | cathode  | time (h) | yield (%) <sup>[b]</sup> |
|-------------------------|------------------------------------------------|----------|----------|--------------------------|
| <b>1</b>                | none                                           | graphite | 8        | 23                       |
| <b>2</b>                | <sup>n</sup> Bu <sub>4</sub> NBF <sub>4</sub>  | graphite | 8        | 40                       |
| <b>3</b> <sup>[c]</sup> | <sup>n</sup> Bu <sub>4</sub> NBF <sub>4</sub>  | graphite | 8        | 37                       |
| <b>4</b> <sup>[d]</sup> | <sup>n</sup> Bu <sub>4</sub> NBF <sub>4</sub>  | graphite | 8        | 21                       |
| <b>5</b> <sup>[e]</sup> | <sup>n</sup> Bu <sub>4</sub> NPF <sub>6</sub>  | graphite | 8        | 43                       |
| <b>6</b>                | <sup>n</sup> Bu <sub>4</sub> NClO <sub>4</sub> | graphite | 8        | 30                       |
| <b>7</b>                | <sup>n</sup> Bu <sub>4</sub> NI                | graphite | 8        | 39                       |
| <b>8</b>                | <sup>n</sup> Bu <sub>4</sub> NBr               | graphite | 8        | trace                    |
| <b>9</b> <sup>[e]</sup> | <sup>n</sup> Bu <sub>4</sub> NHSO <sub>4</sub> | graphite | 8        | 43                       |
| <b>10</b>               | Et <sub>4</sub> NBF <sub>4</sub>               | graphite | 8        | 42                       |

|                         |      |          |    |    |
|-------------------------|------|----------|----|----|
| <b>11</b>               | LiBr | graphite | 6  | 66 |
| <b>12<sup>[f]</sup></b> | LiBr | graphite | 6  | 67 |
| <b>13</b>               | LiBr | Fe       | 8  | 36 |
| <b>14<sup>[e]</sup></b> | LiBr | Ni       | 8  | 40 |
| <b>15</b>               | LiBr | Pt       | 8  | 47 |
| <b>16<sup>[g]</sup></b> | LiBr | graphite | 12 | 21 |
| <b>17<sup>[h]</sup></b> | LiBr | graphite | 12 | 69 |
| <b>18<sup>[i]</sup></b> | LiBr | graphite | 12 | 67 |

[a] Reaction conditions: Pt anode, cathode, 2-phenyl imidazo[1,2-*a*]pyridine **1a** (0.2 mmol), *N,N*-dimethylaniline **2a** (1.0 mmol), electrolyte (0.1 mmol) and AcOH (0.5 mL) were dissolved in 4.5 mL solvent, the mixture was stirred under air at room temperature for specific time, constant current = 6 mA. [b] Yield was determined by <sup>1</sup>H NMR with 3-Methylanisole as the standard. [c] 200 μL AcOH was used. [d] 1.0 mL AcOH was used. [e] Product **3aa** was detected in <sup>1</sup>H NMR. [f] The reaction was conducted under N<sub>2</sub>. [g] 0.2 mmol 2,6-Di-*tert*-butyl-4-methylphenol (BHT) was added. [h] 0.2 mmol TEMPO was added. [i] 0.05 mmol TEMPO was added.

Table S3 The effect of acetic acid and <sup>n</sup>Bu<sub>4</sub>NBF<sub>4</sub> for the aminomethylation

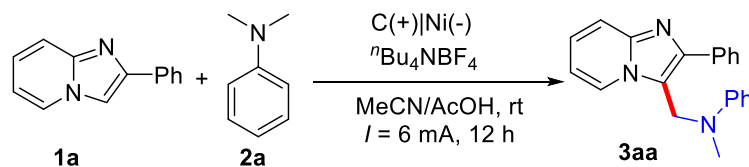

| entry                  | <sup>n</sup> Bu <sub>4</sub> NBF <sub>4</sub> loading | amounts of AcOH | Yield (%) <sup>[b]</sup> |
|------------------------|-------------------------------------------------------|-----------------|--------------------------|
| <b>1</b>               | 1 equiv                                               | none            | trace                    |
| <b>2<sup>[c]</sup></b> | 1 equiv                                               | 25 μL           | 21                       |
| <b>3</b>               | 1 equiv                                               | 50 μL           | 56                       |
| <b>4<sup>[c]</sup></b> | 1 equiv                                               | 100 μL          | 32                       |
| <b>5</b>               | none                                                  | 50 μL           | 41                       |
| <b>6</b>               | 0.25 equiv                                            | 50 μL           | 47                       |
| <b>7</b>               | 0.5 equiv                                             | 50 μL           | 63                       |
| <b>8</b>               | 1.5 equiv                                             | 50 μL           | 53                       |

[a] Reaction condition: graphite anode, nickel cathode, 0.2 mmol **1a**, 1.0 mmol **2a**, specific amounts of <sup>n</sup>Bu<sub>4</sub>NBF<sub>4</sub> and AcOH were dissolved in 5 mL acetonitrile, the mixture was stirred under air at room temperature for 12 h, constant current = 6 mA. [b] Yield was determined by <sup>1</sup>H NMR with 3-Methylanisole as the standard. [c] The reaction was not complete.

Table S4 The effect of acetic acid and <sup>n</sup>Bu<sub>4</sub>NBF<sub>4</sub> for the arylmethylation

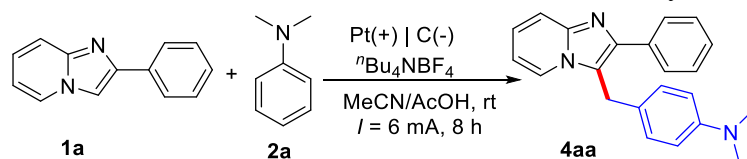

| entry            | <sup>n</sup> Bu <sub>4</sub> NBF <sub>4</sub> loading | amounts of AcOH | Yield (%) <sup>[b]</sup> |
|------------------|-------------------------------------------------------|-----------------|--------------------------|
| 1 <sup>[c]</sup> | 1 equiv                                               | 50 μL           | N.P.                     |
| 2 <sup>[d]</sup> | 1 equiv                                               | 100 μL          | trace                    |
| 3 <sup>[e]</sup> | 1 equiv                                               | 200 μL          | 21                       |
| 4                | 1 equiv                                               | 0.5 mL          | 39                       |
| 5                | 1 equiv                                               | 1.0 mL          | 37                       |
| 6                | 1 equiv                                               | 1.5 mL          | 32                       |
| 7                | none                                                  | 0.5 mL          | 23                       |
| 8                | 0.25 equiv                                            | 0.5 mL          | 34                       |
| 9                | 0.5 equiv                                             | 0.5 mL          | 40                       |
| 10               | 2.0 equiv                                             | 0.5 mL          | 39                       |

[a] Reaction condition: graphite anode, nickel cathode, 0.2 mmol **1a**, 1.0 mmol **2a**, specific amounts of <sup>n</sup>Bu<sub>4</sub>NBF<sub>4</sub> and AcOH were dissolved in 5 mL acetonitrile, the mixture was stirred under air at room temperature for 12 h, constant current = 6 mA. [b] Yield was determined by <sup>1</sup>H NMR with 3-Methylanisole as the standard. [c] 11% **3aa** was detected. [d] 18% **3aa** was detected. [e] 29% **3aa** was detected. N.P. = No product.

Table S5 The effects of electrolytes

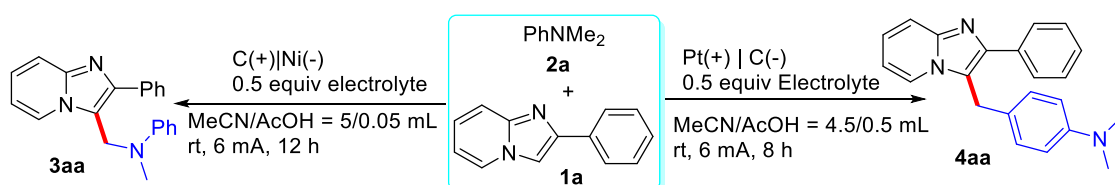

| entry            | electrolyte                                       | Yield <b>3aa</b> (%) <sup>[b]</sup> | Yield <b>4aa</b> (%) <sup>[b]</sup> |
|------------------|---------------------------------------------------|-------------------------------------|-------------------------------------|
| 1                | <sup>n</sup> Bu <sub>4</sub> NBF <sub>4</sub>     | 63 (61)                             | 40                                  |
| 2                | <sup>n</sup> Bu <sub>4</sub> NPF <sub>6</sub>     | 46                                  | 43; 27 <sup>[c]</sup>               |
| 3                | <sup>n</sup> Bu <sub>4</sub> NClO <sub>4</sub>    | 34                                  | 30                                  |
| 4                | <sup>n</sup> Bu <sub>4</sub> NI                   | 37                                  | 39                                  |
| 5 <sup>[c]</sup> | <sup>n</sup> Bu <sub>4</sub> NBr                  | 45                                  | trace                               |
| 6                | <sup>n</sup> Bu <sub>4</sub> NF·3H <sub>2</sub> O | trace                               | 57; 21 <sup>[c]</sup>               |
| 7                | <sup>n</sup> Bu <sub>4</sub> NHSO <sub>4</sub>    | n.r.                                | 43; 12 <sup>[c]</sup>               |
| 8                | <sup>n</sup> Bu <sub>4</sub> NOAc                 | 34                                  | trace                               |
| 9                | <sup>n</sup> Bu <sub>4</sub> NBr <sub>3</sub>     | trace                               | 15                                  |
| 10               | <sup>n</sup> Bu <sub>4</sub> PBr                  | trace                               | 45                                  |

|                   |                                   |                   |                       |
|-------------------|-----------------------------------|-------------------|-----------------------|
| 11                | Et <sub>4</sub> NBF <sub>4</sub>  | 46                | 42                    |
| 12                | NH <sub>4</sub> PF <sub>6</sub>   | trace             | 51; 4 <sup>[c]</sup>  |
| 13                | Et <sub>4</sub> NOTs              | 21                | 46; 5 <sup>[c]</sup>  |
| 14                | Et <sub>4</sub> NCl               | trace             | 27; 12 <sup>[c]</sup> |
| 15                | Et <sub>4</sub> NClO <sub>4</sub> | 38                | 41; 7 <sup>[c]</sup>  |
| 16                | NaOPiv·H <sub>2</sub> O           | 36                | 6                     |
| 17 <sup>[e]</sup> | NH <sub>4</sub> I                 | 15                | 16                    |
| 18                | NH <sub>4</sub> OAc               | n.r.              | 30; 18 <sup>[c]</sup> |
| 19                | KPF <sub>6</sub>                  | 41                | 31                    |
| 20                | LiBr                              | trace             | 66 (64)               |
| 21                | Li <sub>2</sub> CO <sub>3</sub>   | trace             | 43                    |
| 22                | KI                                | 42                | trace                 |
| 23                | CAN                               | 39 <sup>[c]</sup> | 20                    |
| 24                | [BMIM]PF <sub>6</sub>             | 43                | trace                 |
| 25                | AcONa                             | trace             | 46; 20 <sup>[c]</sup> |

[a] Reaction condition: graphite anode, nickel cathode, 0.2 mmol **1a**, 1.0 mmol **2a**, 0.1 mmol electrolyte and 50 μL /0.5 mL AcOH were dissolved in 5/4.5 mL acetonitrile, the mixture was stirred under air at room temperature for 12 h, constant current = 6 mA. [b] Yield was determined by <sup>1</sup>H NMR with 3-methylanisole as the standard. Isolated yield was presented in parenthesis. [c] **3aa** was detected in <sup>1</sup>H NMR. [d] The reaction was not complete. [e] **4aa** was detected in <sup>1</sup>H NMR.

Table S6 The effect of aliphatic acid and solvent

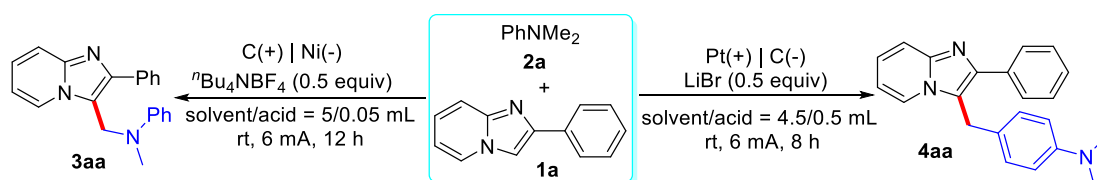

| entry | Solvent | acid                              | Yield <b>3aa</b> (%) <sup>[b]</sup> | Yield <b>4aa</b> (%) <sup>[b]</sup> |
|-------|---------|-----------------------------------|-------------------------------------|-------------------------------------|
| 1     | MeCN    | AcOH                              | 63 (62)                             | 66 (64)                             |
| 2     | MeCN    | propionic acid                    | 43                                  | 37, 31 <sup>[c]</sup>               |
| 3     | MeCN    | butyric acid                      | trace <sup>[d]</sup>                | 5, 30% <sup>[c]</sup>               |
| 4     | MeCN    | isobutyric acid                   | n.r.                                | n.p., 48 <sup>[c]</sup>             |
| 5     | MeCN    | pivalic acid                      | n.r.                                | n.p., 52 <sup>[c]</sup>             |
| 6     | MeCN    | CH <sub>3</sub> SO <sub>3</sub> H | n.p. 8 <sup>[c]</sup>               | n.p., 8% dimer                      |
| 7     | DME     | AcOH                              | trace                               | n.p. 23 <sup>[c]</sup>              |
| 8     | DCE     | AcOH                              | trace                               | 36, 11 <sup>[c]</sup>               |
| 9     | DCM     | AcOH                              | trace                               | trace                               |

|    |      |      |       |                               |
|----|------|------|-------|-------------------------------|
| 10 | DMSO | AcOH | trace | trace                         |
| 11 | DMF  | AcOH | n.r.  | n.p. 15 <sup>[c]</sup>        |
| 12 | THF  | AcOH | trace | n.p. 15 <sup>[c]</sup>        |
| 13 | MeOH | AcOH | Trace | trace, 59 <sup>[c]</sup> (57) |
| 14 | EtOH | AcOH | trace | trace                         |

[a] Reaction condition: graphite anode, nickel cathode, 0.2 mmol **1a**, 1.0 mmol **2a**, 0.1 mmol electrolyte and 50  $\mu$ L /0.5 mL AcOH were dissolved in 5/4.5 mL acetonitrile, the mixture was stirred under air at room temperature for 12 h, constant current = 6 mA. [b] Yield was determined by <sup>1</sup>H NMR with 3-methylanisole as the standard. Isolated yield was presented in parenthesis. [c] **3aa** was detected in <sup>1</sup>H NMR. [d] The reaction was not complete. [e] **4aa** was detected in <sup>1</sup>H NMR. n.r.= no reaction. n.p. = no product.

Table S7 The effect of current and temperature

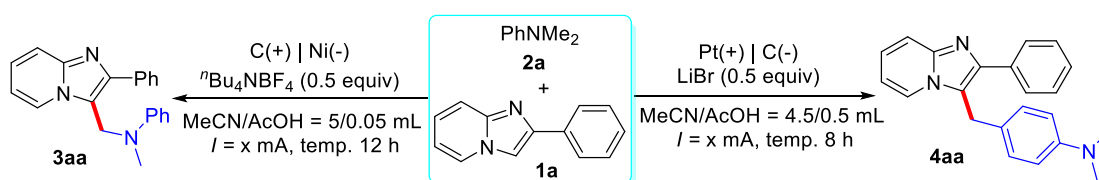

| entry | x  | Temp. | Yield 3aa (%) <sup>[b]</sup> | Yield 4aa (%) <sup>[b]</sup> |
|-------|----|-------|------------------------------|------------------------------|
| 1     | 4  | r.t.  | 62                           | 42                           |
| 2     | 6  | r.t.  | 63                           | 66                           |
| 3     | 8  | r.t.  | 60                           | 49                           |
| 4     | 10 | r.t.  | 60                           | 42                           |
| 5     | 6  | 50    | 54                           | 63                           |
| 6     | 6  | 70    | 47                           | 41                           |

[a] Reaction condition: graphite anode, nickel cathode, 0.2 mmol **1a**, 1.0 mmol **2a**, 0.1 mmol electrolyte and 50  $\mu$ L /0.5 mL AcOH were dissolved in 5/4.5 mL acetonitrile, the mixture was stirred under air at room temperature, constant current = 6 mA. [b] Yield was determined by <sup>1</sup>H NMR with 3-methylanisole as the standard.

Table S8 The effect of electrode

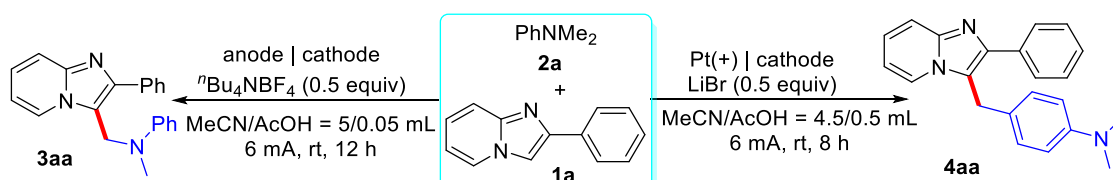

| entry | Anode    | Cathode | Yield 3aa (%) <sup>[b]</sup> | Cathode  | Yield 4aa (%) <sup>[b]</sup> |
|-------|----------|---------|------------------------------|----------|------------------------------|
| 1     | Graphite | Ni      | 63                           | Graphite | 66                           |
| 2     | Graphite | Ni foam | 8                            | RVC      | 45                           |

|    |          |          |                       |          |                       |
|----|----------|----------|-----------------------|----------|-----------------------|
| 3  | Graphite | Fe       | 42; 12 <sup>[c]</sup> | C paper  | 49                    |
| 4  | Graphite | SS       | 45                    | C foam   | 34                    |
| 5  | Graphite | Pt       | 10                    | C felt   | trace                 |
| 6  | Graphite | Cu       | trace <sup>[d]</sup>  | Fe       | 36                    |
| 7  | Graphite | Al       | 27; 8 <sup>[c]</sup>  | SS       | 40                    |
| 8  | Graphite | Zn       | 10                    | Ni       | 40; 20 <sup>[e]</sup> |
| 9  | Graphite | Sn       | Trace <sup>[d]</sup>  | Ni foam  | Trace <sup>[d]</sup>  |
| 10 | Graphite | Nb       | 5                     | Cu       | 30; 20 <sup>[e]</sup> |
| 11 | Graphite | W        | 46                    | Cu foam  | trace                 |
| 12 | Graphite | Ti       | trace                 | Pt       | 47                    |
| 13 | Graphite | Pb       | n.p.                  | Al       | 37                    |
| 14 | Graphite | Mo       | trace                 | Zn       | 35                    |
| 15 | Graphite | Graphite | 44                    | Mg       | 53                    |
| 16 | Graphite | RVC      | 41                    | Sn       | 45                    |
| 17 | Graphite | C paper  | 21                    | Nb       | 38                    |
| 18 | Graphite | C foam   | 13                    | W        | trace                 |
| 19 | Graphite | C felt   | 23                    | Ti       | 51                    |
| 20 | RVC      | Ni       | 26                    | Pb       | 63                    |
| 21 | C paper  | Ni       | 47                    | Mo       | 54                    |
| 22 | C foam   | Ni       | 34                    | Graphite | 67 <sup>[f]</sup>     |
| 23 | C felt   | Ni       | 51                    |          |                       |
| 24 | Graphite | Ni       | 62 <sup>[f]</sup>     |          |                       |

[a] Reaction condition: graphite anode, nickel cathode, 0.2 mmol **1a**, 1.0 mmol **2a**, 0.1 mmol electrolyte and 50  $\mu$ L /0.5 mL AcOH were dissolved in 5/4.5 mL acetonitrile, the mixture was stirred under air at room temperature for 12 h, constant current = 6 mA. [b] Yield was determined by <sup>1</sup>H NMR with 3-methylanisole as the standard. [c] **4aa** was detected in <sup>1</sup>H NMR. [d] The reaction was not complete. [e] **3aa** was detected in <sup>1</sup>H NMR. [f] The reaction was conducted under N<sub>2</sub>. n.r.= no reaction. n.p. = no product. RVC = reticulated glass carbon. SS = stainless steel.

## 6. Deuterium-labeling experiments

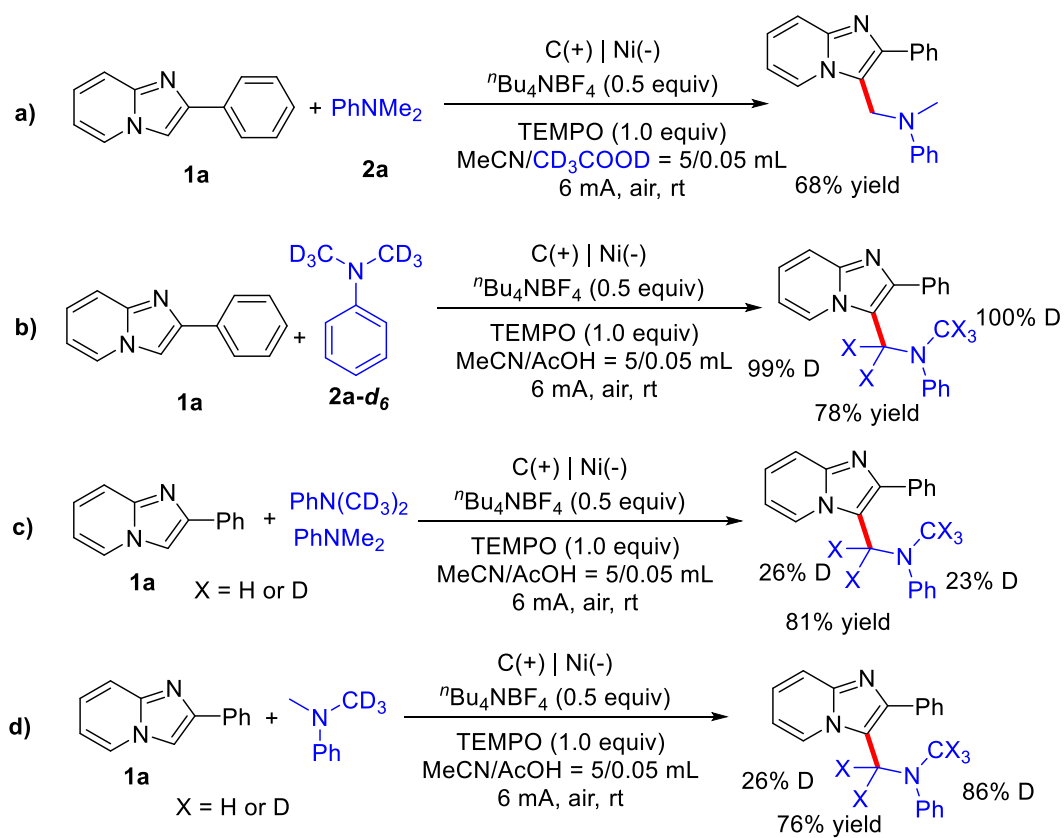

Scheme S1 The deuterium-labelling experiment for **3aa**

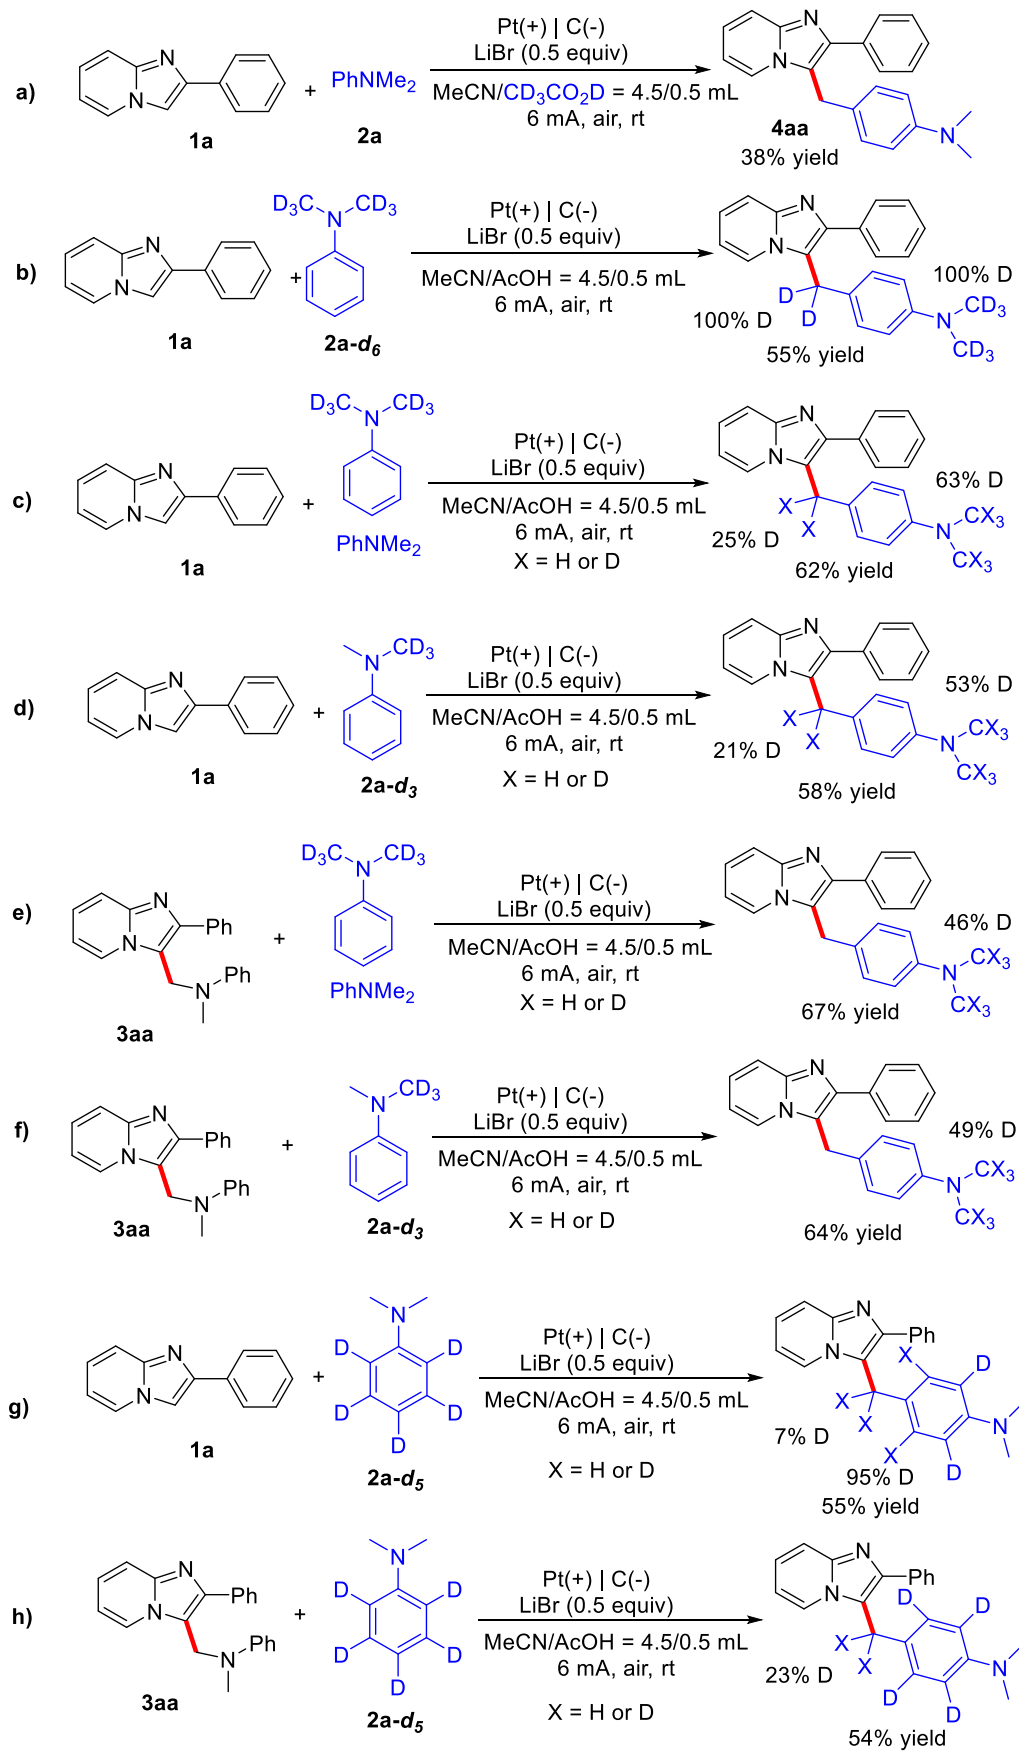

Scheme S2 The deuterium-labelling experiment for **4aa**



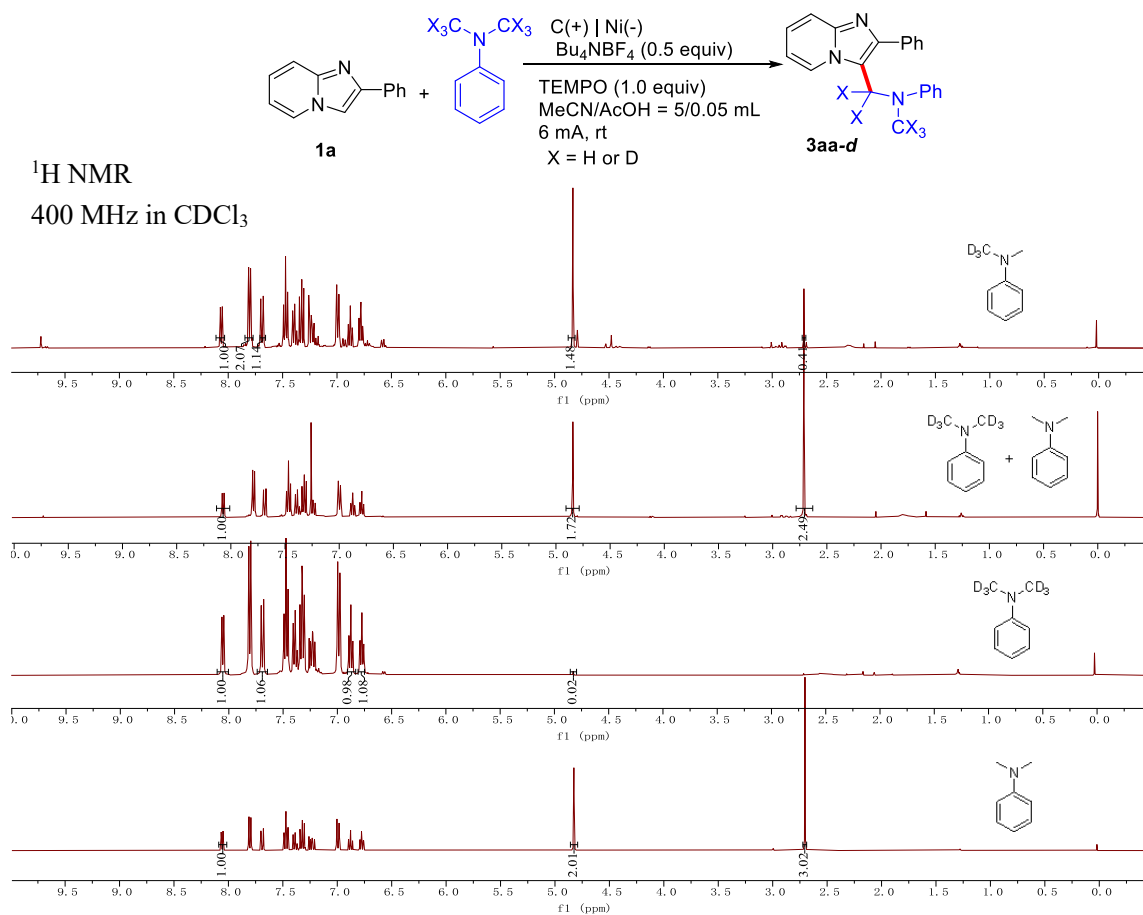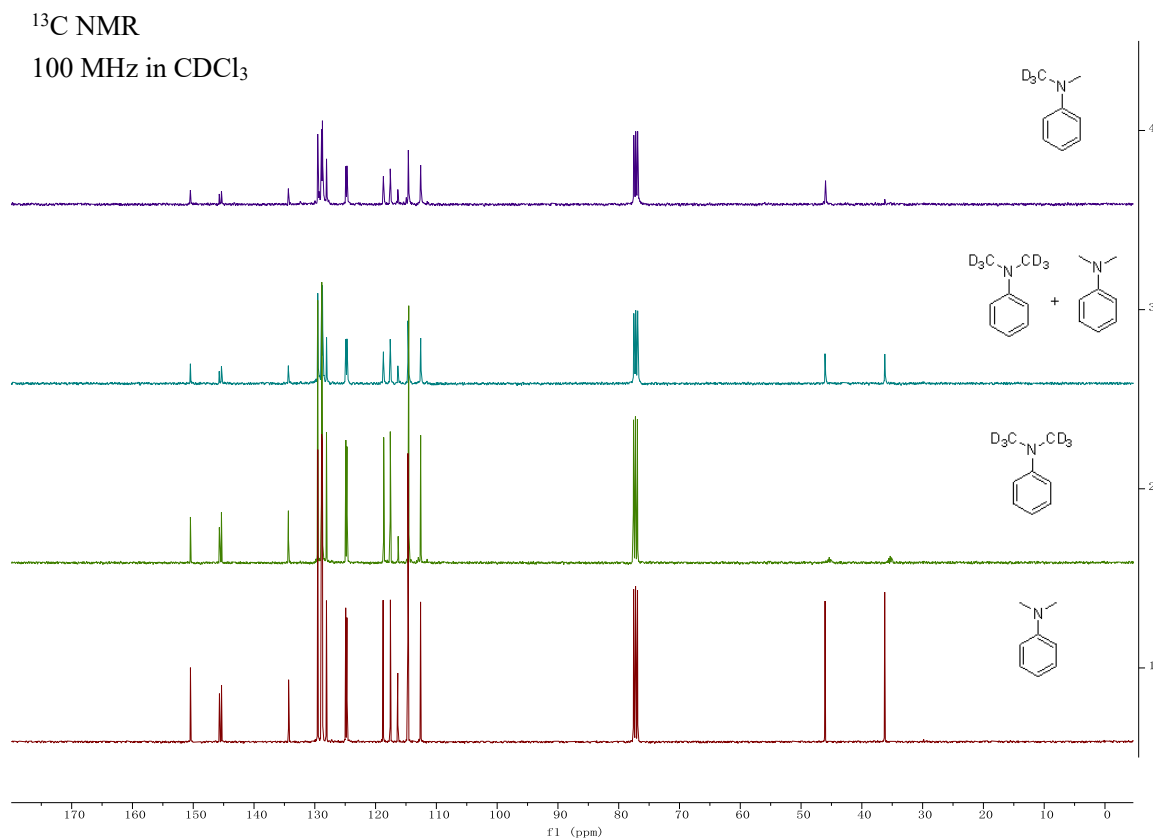

Figure S5  $^1\text{H-NMR}$ ,  $^{13}\text{C-NMR}$  of deuterated **3aa**

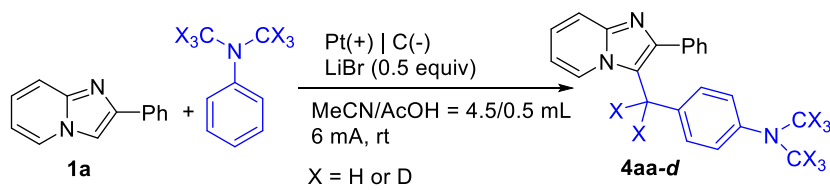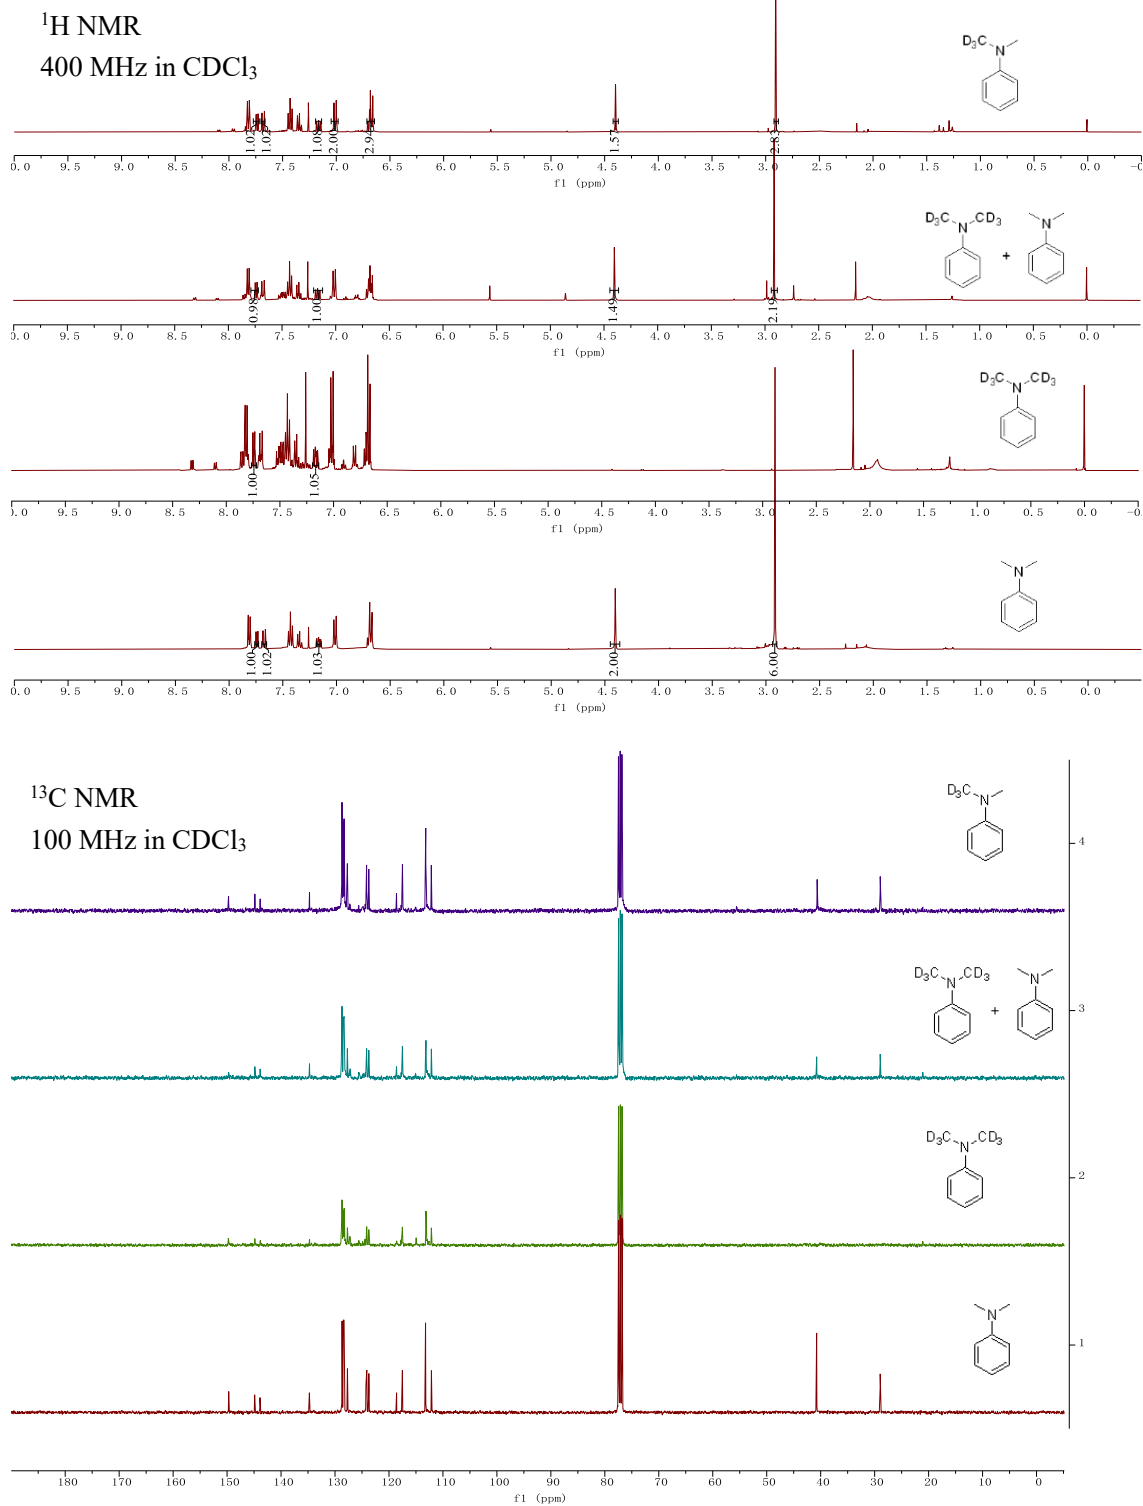

Figure S6 <sup>1</sup>H-NMR, <sup>13</sup>C-NMR of deuterated **4aa**

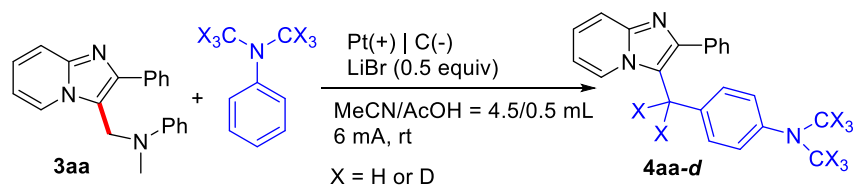

$^1\text{H}$  NMR

400 MHz in  $\text{CDCl}_3$

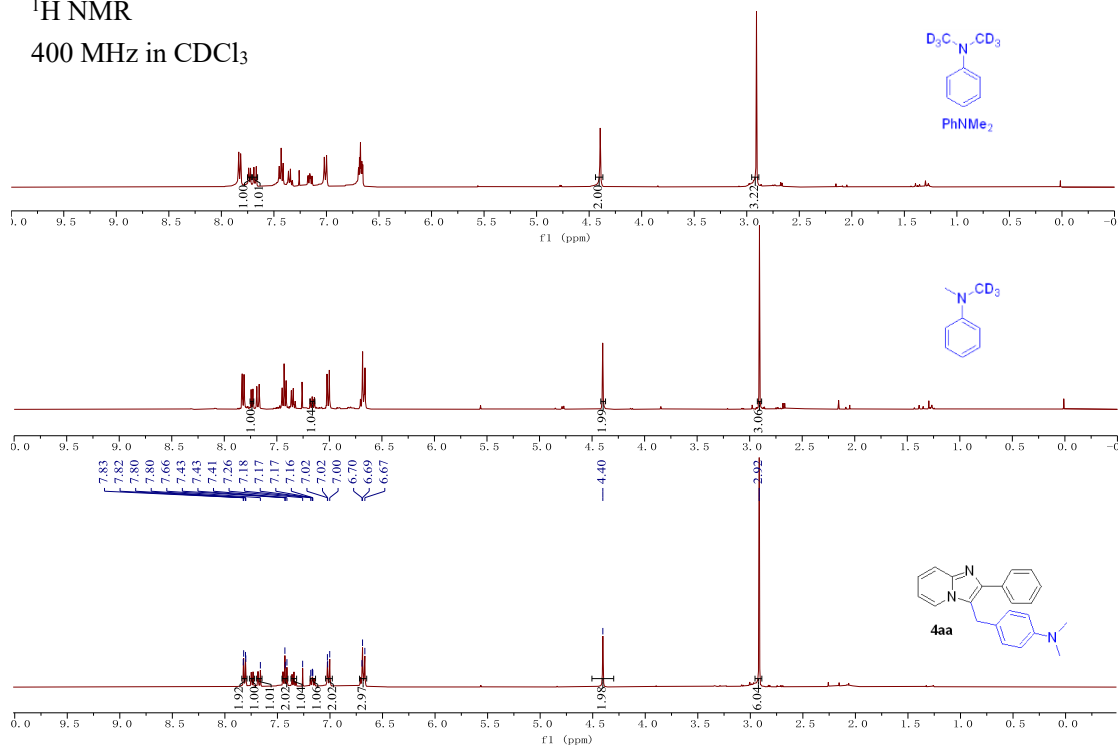

$^{13}\text{C}$  NMR

100 MHz in  $\text{CDCl}_3$

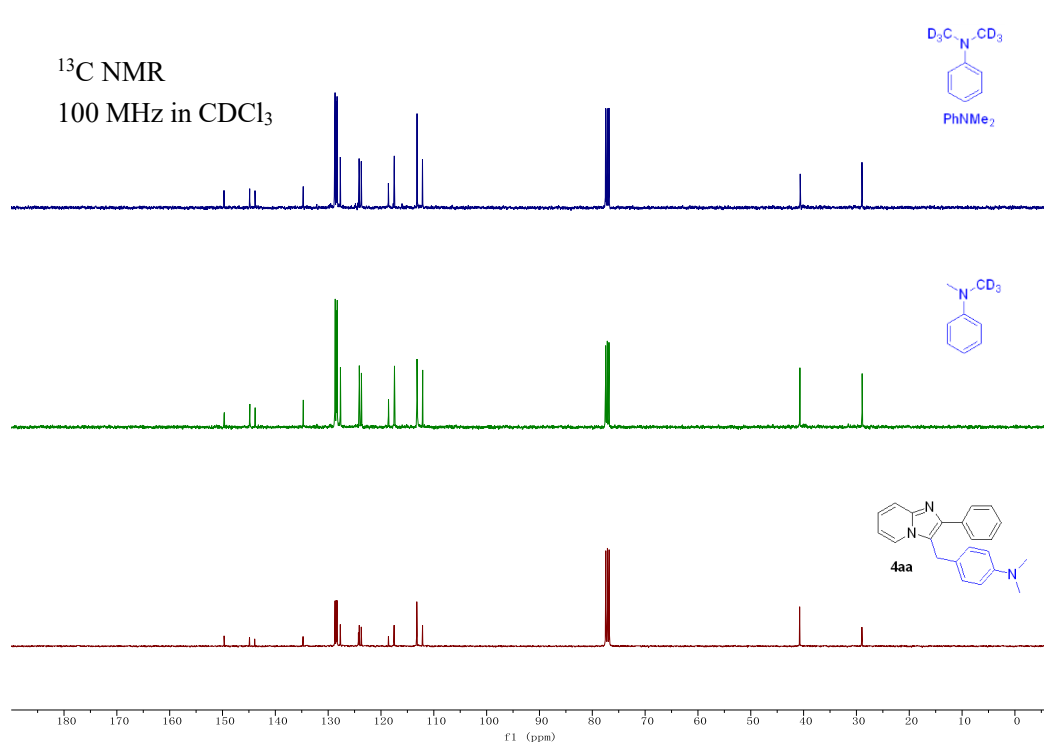

Figure S7  $^1\text{H}$ -NMR,  $^{13}\text{C}$ -NMR for the reaction of **3aa** with deuterated anilines

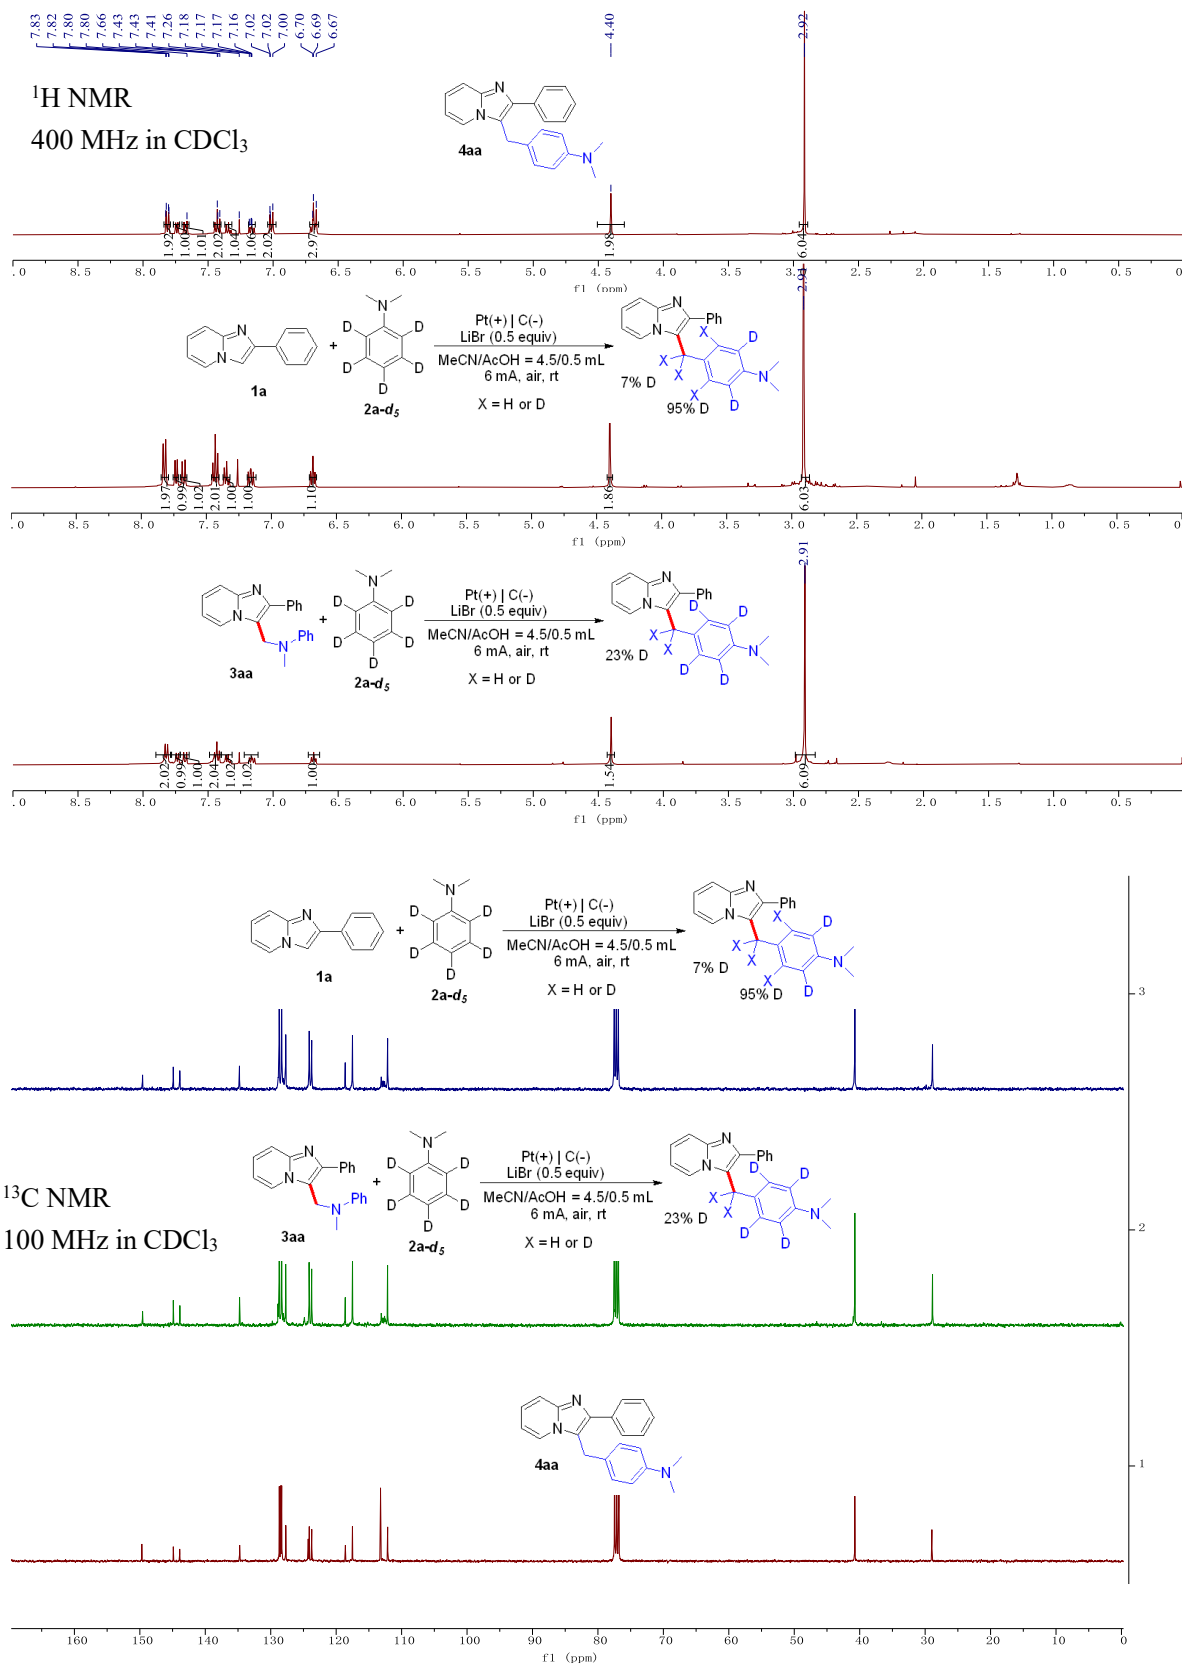

Figure S8 <sup>1</sup>H-NMR, <sup>13</sup>C-NMR of deuterated **4aa-D<sub>5</sub>**

## 7. Free radical trap experiments and proposed mechanisms for 3aa

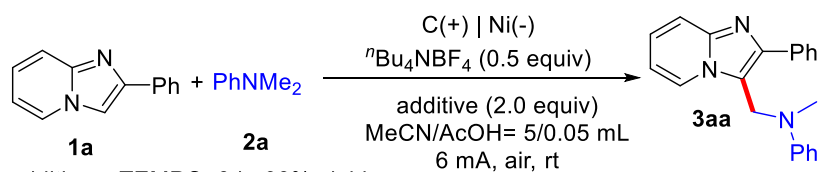

additive = TEMPO, 3 h, 98% yield  
 additive = BHT, 12 h, trace  
 additive = 1,1-diphenylethylene, 12 h, 21% yield  
 additive = 2-benzylidenemalononitrile, 12 h, 13% yield

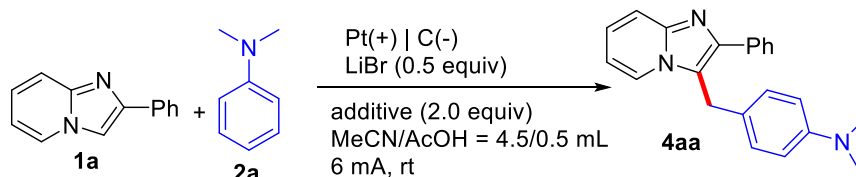

additive = TEMPO, 12 h, 71% yield  
 additive = BHT, 12 h, 30% yield  
 additive = 1,1-diphenylethylene, 12 h, 14% yield  
 additive = 2-benzylidenemalononitrile, 12 h, 8% yield

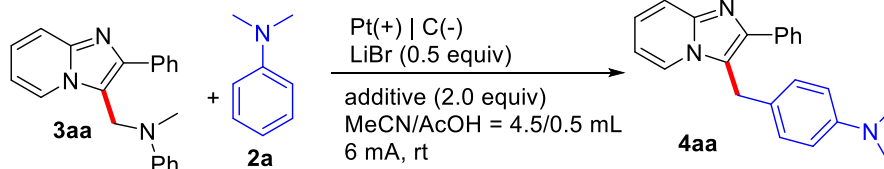

additive = TEMPO, 12 h, 75% yield  
 additive = BHT, 12 h, 65% yield  
 additive = 1,1-diphenylethylene, 12 h, 28% yield  
 additive = 2-benzylidenemalononitrile, 12 h, 42% yield

Scheme S3 The Free radical trap experiments

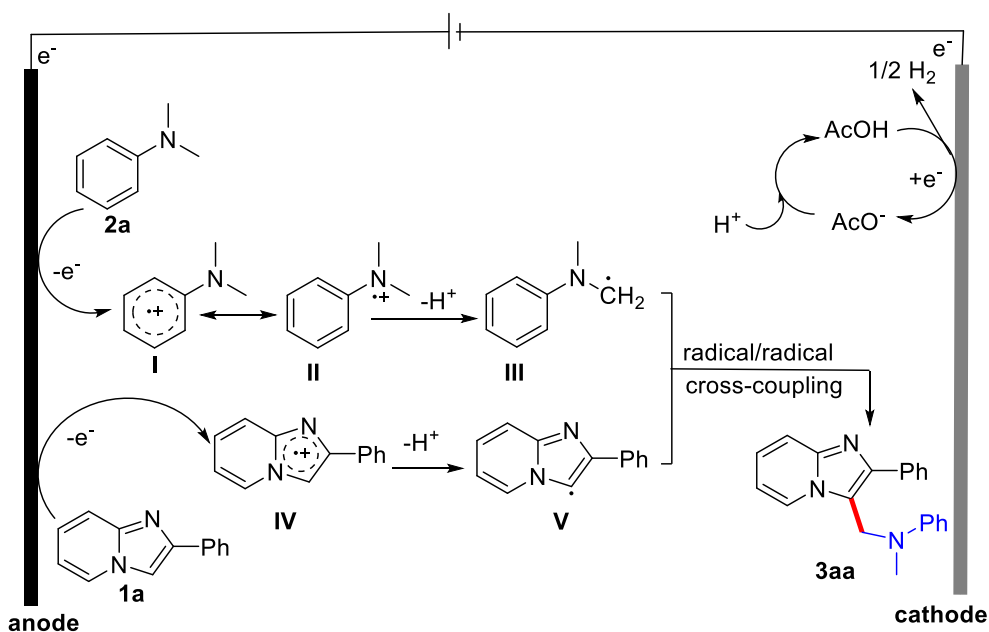

Scheme S4 Proposed mechanisms for 3aa

## 8. Characterization data (<sup>1</sup>H-NMR, <sup>13</sup>C-NMR and <sup>19</sup>F-NMR) of products

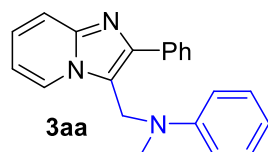

*N*-Methyl-*N*-((2-phenylimidazo[1,2-*a*]pyridin-3-yl)methyl)aniline. Compound **3aa** (61 mg, Yield = 98%,  $R_f = 0.3$  (PE/EA = 5:1)) was isolated as a light brown solid; mp 197–199 °C. <sup>1</sup>H NMR (400 MHz, CDCl<sub>3</sub>)  $\delta$  8.06 (dt,  $J = 6.9, 1.2$  Hz, 1H), 7.82–7.78 (m, 2H), 7.69 (dt,  $J = 9.1, 1.1$  Hz, 1H), 7.51–7.44 (m, 2H), 7.41–7.36 (m, 1H), 7.35–7.29 (m, 2H), 7.23 (ddd,  $J = 9.1, 6.7, 1.3$  Hz, 1H), 7.02–6.96 (m, 2H), 6.90–6.85 (m, 1H), 6.78 (td,  $J = 6.8, 1.2$  Hz, 1H), 4.83 (s, 2H), 2.70 (s, 3H); <sup>13</sup>C NMR (100 MHz, CDCl<sub>3</sub>)  $\delta$  150.39, 145.62, 145.28, 134.25, 129.45, 128.82, 128.68, 128.02, 124.85, 124.65, 118.70, 117.50, 116.29, 114.61, 112.54, 45.98, 36.18; HRMS (ESI)  $m/z$ : [M + H]<sup>+</sup> Calcd for C<sub>21</sub>H<sub>20</sub>N<sub>3</sub> 314.1652; Found 314.1650. <sup>1</sup>H NMR and <sup>13</sup>C NMR data are consistent with the reported values.<sup>4-6</sup>

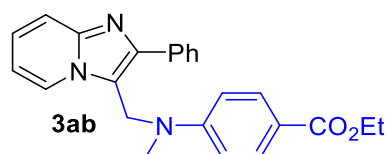

Ethyl 4-(methyl((2-phenylimidazo[1,2-*a*]pyridin-3-yl)methyl)amino)benzoate. Compound **3ab** (47 mg, Yield = 61%,  $R_f = 0.3$  (PE/EA = 2:1)) was isolated as a light brown paste. <sup>1</sup>H NMR (400 MHz, CDCl<sub>3</sub>)  $\delta$  8.02–7.96 (m, 2H), 7.85 (dt,  $J = 6.9, 1.2$  Hz, 1H), 7.77–7.73 (m, 2H), 7.69 (dt,  $J = 9.1, 1.1$  Hz, 1H), 7.50–7.44 (m, 2H), 7.42–7.36 (m, 1H), 7.27–7.22 (m, 1H), 6.94–6.87 (m, 2H), 6.79 (td,  $J = 6.8, 1.2$  Hz, 1H), 4.95 (s, 2H), 4.34 (q,  $J = 7.1$  Hz, 2H), 2.76 (s, 3H), 1.38 (t,  $J = 7.1$  Hz, 3H); <sup>13</sup>C NMR (100 MHz, CDCl<sub>3</sub>)  $\delta$  166.86, 153.07, 146.13, 145.48, 134.01, 131.59, 128.85, 128.82, 128.30, 125.14, 124.16, 119.35, 117.80, 115.47, 113.03, 112.10, 60.50, 44.70, 35.12, 14.58; HRMS (ESI)  $m/z$ : [M + H]<sup>+</sup> Calcd for C<sub>24</sub>H<sub>24</sub>N<sub>3</sub>O<sub>2</sub> 386.1863; Found 386.1863.

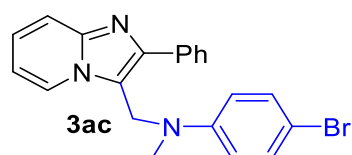

4-Bromo-*N*-methyl-*N*-((2-phenylimidazo[1,2-*a*]pyridin-3-yl)methyl)aniline. Compound **3ac** (68

mg, Yield = 87%,  $R_f = 0.3$  (PE/EA = 5:1)) was isolated as a light brown solid.  $^1\text{H NMR}$  (400 MHz,  $\text{CDCl}_3$ )  $\delta$  7.96 (dt,  $J = 6.9, 1.2$  Hz, 1H), 7.78–7.72 (m, 2H), 7.68 (dt,  $J = 9.1, 1.1$  Hz, 1H), 7.48–7.42 (m, 2H), 7.41–7.33 (m, 3H), 7.22 (ddd,  $J = 9.1, 6.7, 1.3$  Hz, 1H), 6.83–6.77 (m, 3H), 4.78 (s, 2H), 2.67 (s, 3H);  $^{13}\text{C NMR}$  (100 MHz,  $\text{CDCl}_3$ )  $\delta$  149.21, 145.83, 145.35, 134.16, 132.12, 128.80, 128.74, 128.14, 124.94, 124.38, 117.65, 115.97, 115.85, 112.71, 110.63, 45.77, 36.18; HRMS (ESI)  $m/z$ :  $[\text{M} + \text{H}]^+$  Calcd for  $\text{C}_{21}\text{H}_{19}\text{N}_3\text{Br}$  392.0757; Found 392.0759.

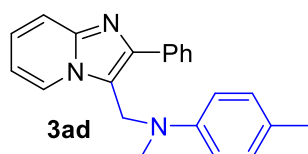

*N*,4-Dimethyl-*N*-((2-phenylimidazo[1,2-*a*]pyridin-3-yl)methyl)aniline. Compound **3ad** (62 mg, Yield = 89%,  $R_f = 0.3$  (PE/EA = 5:1)) was isolated as a light brown solid; mp 121–122 °C.  $^1\text{H NMR}$  (400 MHz,  $\text{CDCl}_3$ )  $\delta$  8.11 (dt,  $J = 6.9, 1.2$  Hz, 1H), 7.83–7.78 (m, 2H), 7.68 (dt,  $J = 9.0, 1.2$  Hz, 1H), 7.49–7.43 (m, 2H), 7.42–7.36 (m, 1H), 7.25–7.19 (m, 1H), 7.15–7.09 (m, 2H), 6.96–6.89 (m, 2H), 6.77 (td,  $J = 6.8, 1.2$  Hz, 1H), 4.77 (s, 2H), 2.68 (s, 3H), 2.31 (s, 3H);  $^{13}\text{C NMR}$  (100 MHz,  $\text{CDCl}_3$ )  $\delta$  148.46, 145.52, 145.26, 134.34, 129.94, 128.97, 128.87, 128.66, 128.37, 127.98, 124.80, 117.47, 116.52, 115.29, 112.43, 46.66, 36.91, 20.42; HRMS (ESI)  $m/z$ :  $[\text{M} + \text{H}]^+$  Calcd for  $\text{C}_{22}\text{H}_{22}\text{N}_3$  328.1808; Found 328.1809.  $^1\text{H NMR}$  and  $^{13}\text{C NMR}$  data are consistent with the literature.<sup>4, 5</sup>

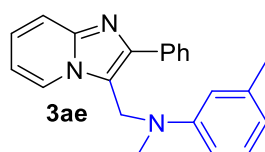

*N*,3-Dimethyl-*N*-((2-phenylimidazo[1,2-*a*]pyridin-3-yl)methyl)aniline. Compound **3ae** (58 mg, Yield = 89%,  $R_f = 0.3$  (PE/EA = 5:1)) was isolated as a light brown paste.  $^1\text{H NMR}$  (400 MHz,  $\text{CDCl}_3$ )  $\delta$  8.08 (dt,  $J = 6.9, 1.1$  Hz, 1H), 7.84–7.78 (m, 2H), 7.69 (dt,  $J = 9.1, 1.2$  Hz, 1H), 7.51–7.44 (m, 2H), 7.42–7.37 (m, 1H), 7.27–7.18 (m, 2H), 6.85–6.75 (m, 3H), 6.71 (d,  $J = 7.5$  Hz, 1H), 4.83 (s, 2H), 2.72 (s, 3H), 2.35 (s, 3H);  $^{13}\text{C NMR}$  (100 MHz,  $\text{CDCl}_3$ )  $\delta$  150.51, 145.64, 145.32, 139.22, 134.35, 129.31, 128.88, 128.70, 128.03, 124.83, 124.75, 119.64, 117.55, 116.42, 115.42, 112.52, 111.84, 46.10, 36.42, 21.96; HRMS (ESI)  $m/z$ :  $[\text{M} + \text{H}]^+$  Calcd for  $\text{C}_{22}\text{H}_{22}\text{N}_3$  328.1808; Found 328.1807.

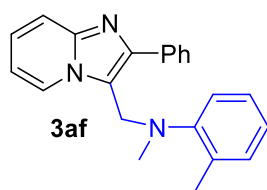

*N*,2-Dimethyl-*N*-((2-phenylimidazo[1,2-*a*]pyridin-3-yl)methyl)aniline. Compound **3af** (57 mg, Yield = 87%,  $R_f$  = 0.3 (PE/EA = 5:1)) was isolated as a light brown paste.  $^1\text{H}$  NMR (400 MHz,  $\text{CDCl}_3$ )  $\delta$  8.24 (dt,  $J$  = 6.9, 1.2 Hz, 1H), 7.83–7.76 (m, 2H), 7.64 (dt,  $J$  = 9.1, 1.2 Hz, 1H), 7.52–7.45 (m, 2H), 7.43–7.37 (m, 1H), 7.23–7.16 (m, 2H), 7.15–7.08 (m, 2H), 7.02 (td,  $J$  = 7.2, 1.7 Hz, 1H), 6.77 (td,  $J$  = 6.8, 1.2 Hz, 1H), 4.60 (s, 2H), 2.52 (s, 3H), 2.26 (s, 3H);  $^{13}\text{C}$  NMR (100 MHz,  $\text{CDCl}_3$ )  $\delta$  151.24, 145.33, 145.14, 134.72, 133.73, 131.31, 129.04, 128.56, 127.84, 126.81, 125.24, 124.58, 124.18, 120.76, 117.39, 117.05, 111.78, 49.23, 42.50, 17.96; HRMS (ESI)  $m/z$ :  $[\text{M} + \text{H}]^+$  Calcd for  $\text{C}_{22}\text{H}_{22}\text{N}_3$  328.1808; Found 328.1808.

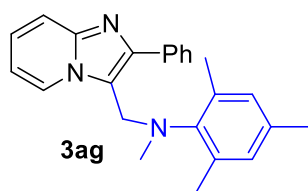

*N*,2,4,6-Tetramethyl-*N*-((2-phenylimidazo[1,2-*a*]pyridin-3-yl)methyl)aniline. Compound **3ag** (60 mg, Yield = 85%,  $R_f$  = 0.3 (PE/EA = 5:1)) was isolated as a light brown paste.  $^1\text{H}$  NMR (400 MHz,  $\text{CDCl}_3$ )  $\delta$  7.93 (dt,  $J$  = 6.8, 1.2 Hz, 1H), 7.74–7.68 (m, 2H), 7.65 (dt,  $J$  = 9.0, 1.2 Hz, 1H), 7.47–7.41 (m, 2H), 7.39–7.34 (m, 1H), 7.20 (ddd,  $J$  = 9.0, 6.7, 1.3 Hz, 1H), 6.83 (s, 2H), 6.76 (td,  $J$  = 6.8, 1.2 Hz, 1H), 4.62 (s, 2H), 2.71 (s, 3H), 2.26 (s, 3H), 2.17 (s, 6H);  $^{13}\text{C}$  NMR (100 MHz,  $\text{CDCl}_3$ )  $\delta$  145.61, 144.97, 144.92, 136.73, 135.10, 134.73, 130.11, 128.93, 128.46, 127.74, 124.79, 124.53, 118.64, 117.35, 111.83, 48.56, 40.48, 20.75, 19.25; HRMS (ESI)  $m/z$ :  $[\text{M} + \text{H}]^+$  Calcd for  $\text{C}_{24}\text{H}_{26}\text{N}_3$  356.2121; Found 356.2122.

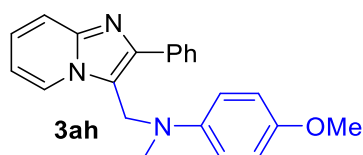

4-Methoxy-*N*-methyl-*N*-((2-phenylimidazo[1,2-*a*]pyridin-3-yl)methyl)aniline. Compound **3ah** (62



mg, Yield = 90%,  $R_f = 0.2$  (PE/EA = 5:1)) was isolated as a light brown paste.  $^1\text{H}$  NMR (400 MHz,  $\text{CDCl}_3$ )  $\delta$  8.17 (dt,  $J = 6.9, 1.2$  Hz, 1H), 7.81–7.76 (m, 2H), 7.66 (dt,  $J = 9.1, 1.1$  Hz, 1H), 7.48–7.42 (m, 2H), 7.40–7.33 (m, 1H), 7.25–7.17 (m, 1H), 6.97–6.92 (m, 2H), 6.88–6.83 (m, 2H), 6.79–6.74 (m, 1H), 4.67 (s, 2H), 3.77 (s, 3H), 2.65 (s, 3H);  $^{13}\text{C}$  NMR (100 MHz,  $\text{CDCl}_3$ )  $\delta$  153.60, 145.43, 145.18, 145.08, 134.40, 128.86, 128.59, 127.90, 124.89, 124.72, 117.83, 117.41, 116.62, 114.70, 112.27, 55.68, 48.03, 38.42; HRMS (ESI)  $m/z$ :  $[\text{M} + \text{H}]^+$  Calcd for  $\text{C}_{22}\text{H}_{22}\text{N}_3\text{O}$  344.1757; Found 344.1757.

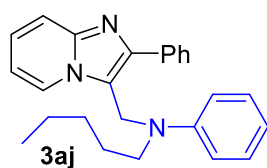

*N*-Pentyl-*N*-((2-phenylimidazo[1,2-*a*]pyridin-3-yl)methyl)aniline. Compound **3aj** (34 mg, Yield = 46%,  $R_f = 0.3$  (PE/EA = 5:1)) was isolated as a light brown paste.  $^1\text{H}$  NMR (400 MHz,  $\text{CDCl}_3$ )  $\delta$  8.03 (dt,  $J = 7.0, 1.2$  Hz, 1H), 7.77–7.73 (m, 2H), 7.69 (dt,  $J = 9.1, 1.2$  Hz, 1H), 7.50–7.45 (m, 2H), 7.42–7.37 (m, 1H), 7.29–7.20 (m, 3H), 6.96–6.91 (m, 2H), 6.83 (tt,  $J = 7.4, 1.0$  Hz, 1H), 6.78 (td,  $J = 6.8, 1.2$  Hz, 1H), 4.85 (s, 2H), 3.04–2.95 (m, 2H), 1.24–1.16 (m, 2H), 1.06–0.98 (m, 2H), 0.96–0.89 (m, 2H), 0.68 (t,  $J = 7.2$  Hz, 3H);  $^{13}\text{C}$  NMR (100 MHz,  $\text{CDCl}_3$ )  $\delta$  149.31, 145.69, 145.25, 134.45, 129.47, 128.95, 128.69, 128.06, 124.96, 124.83, 118.59, 117.53, 116.65, 115.50, 112.41, 49.16, 43.75, 29.16, 25.56, 22.34, 13.98; HRMS (ESI)  $m/z$ :  $[\text{M} + \text{H}]^+$  Calcd for  $\text{C}_{25}\text{H}_{28}\text{N}_3$  370.2278; Found 370.2280.

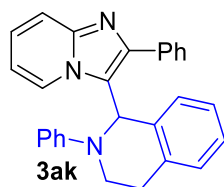

2-Phenyl-1-(2-phenylimidazo[1,2-*a*]pyridin-3-yl)-1,2,3,4-tetrahydroisoquinoline. Compound **3ak** (51 mg, Yield = 64%,  $R_f = 0.3$  (PE/EA = 5:1)) was isolated as a light yellow solid; mp 117–118 °C.  $^1\text{H}$  NMR (400 MHz,  $\text{CDCl}_3$ )  $\delta$  8.19 (d,  $J = 6.7$  Hz, 1H), 7.53 (d,  $J = 9.1$  Hz, 1H), 7.46–7.41 (m, 2H), 7.40–7.33 (m, 3H), 7.28–7.24 (m, 2H), 7.20 (t,  $J = 7.5$  Hz, 1H), 7.11–7.06 (m, 1H), 7.03–6.95 (m, 3H), 6.94–6.88 (m, 2H), 6.72–6.66 (m, 2H), 6.62–6.56 (m, 1H), 5.98 (s, 1H), 3.57–3.51 (m, 1H),

3.49–3.39 (m, 2H), 3.05–2.93 (m, 1H);  $^{13}\text{C}$  NMR (100 MHz,  $\text{CDCl}_3$ )  $\delta$  151.32, 146.81, 144.99, 135.43, 134.86, 134.55, 128.96, 128.77, 128.60, 128.59, 128.29, 127.84, 127.06, 126.70, 126.50, 126.14, 124.43, 123.50, 119.62, 117.17, 111.52, 58.90, 52.63, 30.47; HRMS (ESI)  $m/z$ :  $[\text{M} + \text{H}]^+$  Calcd for  $\text{C}_{28}\text{H}_{24}\text{N}_3$  402.1965; Found 402.1966.  $^1\text{H}$  NMR and  $^{13}\text{C}$  NMR data are consistent with the reported values.<sup>4</sup>

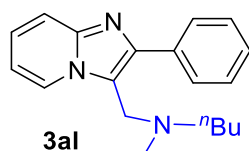

*N*-Methyl-*N*-((2-phenylimidazo[1,2-*a*]pyridin-3-yl)methyl)butan-1-amine. Compound **3al** (50 mg, Yield = 85%,  $R_f$  = 0.2 (PE/EA = 5:1)) was isolated as a light yellow paste.  $^1\text{H}$  NMR (400 MHz,  $\text{CDCl}_3$ )  $\delta$  8.42 (dt,  $J$  = 6.9, 1.2 Hz, 1H), 7.83–7.78 (m, 2H), 7.62 (dt,  $J$  = 9.1, 1.1 Hz, 1H), 7.48–7.41 (m, 2H), 7.38–7.30 (m, 1H), 7.18 (ddd,  $J$  = 9.1, 6.7, 1.3 Hz, 1H), 6.78 (td,  $J$  = 6.8, 1.2 Hz, 1H), 3.93 (s, 2H), 2.43–2.35 (m, 2H), 2.16 (s, 3H), 1.51–1.39 (m, 2H), 1.31–1.22 (m, 2H), 0.83 (t,  $J$  = 7.3 Hz, 3H);  $^{13}\text{C}$  NMR (100 MHz,  $\text{CDCl}_3$ )  $\delta$  145.00, 144.80, 134.74, 128.97, 128.45, 127.66, 125.61, 124.48, 117.53, 117.17, 111.72, 56.95, 51.70, 41.60, 29.45, 20.51, 14.01; HRMS (ESI)  $m/z$ :  $[\text{M} + \text{H}]^+$  Calcd for  $\text{C}_{19}\text{H}_{24}\text{N}_3$  294.1965; Found 294.1964.

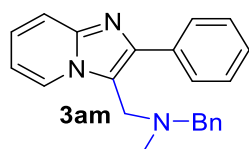

*N*-Benzyl-*N*-methyl-1-(2-phenylimidazo[1,2-*a*]pyridin-3-yl)methanamine. Compound **3am** (50 mg, Yield = 76%,  $R_f$  = 0.3 (PE/EA = 5:1)) was isolated as a light brown paste.  $^1\text{H}$  NMR (400 MHz,  $\text{CDCl}_3$ )  $\delta$  8.41–8.36 (m, 1H), 7.89–7.80 (m, 2H), 7.68–7.61 (m, 1H), 7.52–7.45 (m, 2H), 7.42–7.36 (m, 1H), 7.35–7.18 (m, 6H), 6.87–6.79 (m, 1H), 4.01 (s, 2H), 3.52 (s, 2H), 2.19 (s, 3H);  $^{13}\text{C}$  NMR (100 MHz,  $\text{CDCl}_3$ )  $\delta$  145.08, 145.04, 138.77, 134.68, 129.09, 129.01, 128.51, 128.35, 127.76, 127.25, 125.54, 124.59, 117.25, 111.81, 61.74, 50.98, 42.13, (1C is merged with other peaks); HRMS (ESI)  $m/z$ :  $[\text{M} + \text{H}]^+$  Calcd for  $\text{C}_{22}\text{H}_{22}\text{N}_3$  328.1808; Found 328.1808.

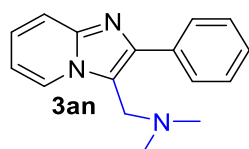

*N,N*-Dimethyl-1-(2-phenylimidazo[1,2-*a*]pyridin-3-yl)methanamine. Compound **3an** (26 mg, Yield = 51%,  $R_f = 0.15$  (PE/EA = 5:1)) was isolated as a light brown paste.  $^1\text{H}$  NMR (400 MHz,  $\text{CDCl}_3$ )  $\delta$  8.40 (d,  $J = 6.9$  Hz, 1H), 7.84–7.77 (m, 2H), 7.64 (d,  $J = 9.1$  Hz, 1H), 7.50–7.43 (m, 2H), 7.41–7.34 (m, 1H), 7.25–7.17 (m, 1H), 6.87–6.77 (m, 1H), 3.89 (s, 2H), 2.26 (s, 6H);  $^{13}\text{C}$  NMR (100 MHz,  $\text{CDCl}_3$ )  $\delta$  145.13, 144.95, 134.77, 129.06, 128.55, 127.78, 125.54, 124.64, 117.48, 117.34, 111.98, 53.02, 45.15; HRMS (ESI)  $m/z$ :  $[\text{M} + \text{H}]^+$  Calcd for  $\text{C}_{16}\text{H}_{18}\text{N}_3$  252.1495; Found 252.1497.  $^1\text{H}$  NMR and  $^{13}\text{C}$  NMR data are consistent with the reported values.<sup>5-7</sup>

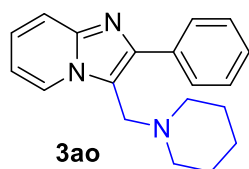

2-Phenyl-3-(piperidin-1-ylmethyl)imidazo[1,2-*a*]pyridine. Compound **3ao** (44 mg, Yield = 76%,  $R_f = 0.3$  (PE/EA = 5:1)) was isolated as a light brown solid; mp 78–90 °C.  $^1\text{H}$  NMR (400 MHz,  $\text{CDCl}_3$ )  $\delta$  8.50–8.44 (m, 1H), 7.83–7.79 (m, 2H), 7.64–7.59 (m, 1H), 7.47–7.41 (m, 2H), 7.37–7.31 (m, 1H), 7.20–7.14 (m, 1H), 6.77 (tt,  $J = 6.8, 1.6$  Hz, 1H), 3.89 (d,  $J = 1.4$  Hz, 2H), 2.40 (br s, 4H), 1.56–1.48 (m, 4H), 1.47–1.35 (m, 2H);  $^{13}\text{C}$  NMR (100 MHz,  $\text{CDCl}_3$ )  $\delta$  145.02, 144.80, 134.77, 129.90, 128.98, 128.44, 127.63, 125.77, 124.42, 117.14, 111.68, 54.29, 52.64, 26.13, 24.46; HRMS (ESI)  $m/z$ :  $[\text{M} + \text{H}]^+$  Calcd for  $\text{C}_{19}\text{H}_{22}\text{N}_3$  292.1808; Found 292.1808.

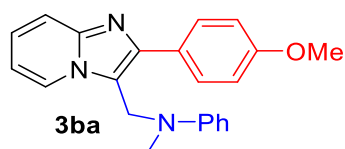

*N*-((2-(4-Methoxyphenyl)imidazo[1,2-*a*]pyridin-3-yl)methyl)-*N*-methylaniline. Compound **3ba** (64 mg, Yield = 93%,  $R_f = 0.2$  (PE/EA = 5:1)) was isolated as a light brown paste.  $^1\text{H}$  NMR (400 MHz,  $\text{CDCl}_3$ )  $\delta$  8.04 (dt,  $J = 6.9, 1.2$  Hz, 1H), 7.75–7.71 (m, 2H), 7.66 (dt,  $J = 9.0, 1.1$  Hz, 1H), 7.35–7.28 (m, 2H), 7.22 (ddd,  $J = 9.0, 6.7, 1.3$  Hz, 1H), 7.01–6.97 (m, 4H), 6.87 (tt,  $J = 7.3, 1.1$  Hz, 1H), 6.77 (td,  $J = 6.8, 1.2$  Hz, 1H), 4.81 (s, 2H), 3.85 (s, 3H), 2.70 (s, 3H);  $^{13}\text{C}$  NMR (100 MHz,

CDCl<sub>3</sub>)  $\delta$  159.62, 150.49, 145.60, 145.28, 130.06, 129.51, 126.85, 124.75, 124.57, 118.71, 117.41, 115.70, 114.65, 114.20, 112.47, 55.44, 46.10, 36.18; HRMS (ESI)  $m/z$ : [M + H]<sup>+</sup> Calcd for C<sub>22</sub>H<sub>22</sub>N<sub>3</sub>O 344.1757; Found 344.1757.

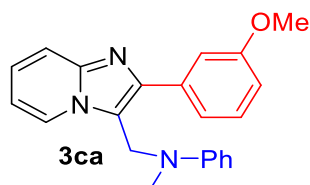

*N*-((2-(3-Methoxyphenyl)imidazo[1,2-*a*]pyridin-3-yl)methyl)-*N*-methylaniline. Compound **3ca** (62 mg, Yield = 90%, R<sub>f</sub> = 0.2 (PE/EA = 5:1)) was isolated as a light brown paste. <sup>1</sup>H NMR (400 MHz, CDCl<sub>3</sub>)  $\delta$  8.07 (dt,  $J$  = 6.9, 1.2 Hz, 1H), 7.69 (dt,  $J$  = 9.0, 1.1 Hz, 1H), 7.38–7.35 (m, 3H), 7.33–7.29 (m, 2H), 7.25–7.21 (m, 1H), 7.00–6.97 (m, 2H), 6.95–6.91 (m, 1H), 6.87 (tt,  $J$  = 7.2, 6.2, 1.0 Hz, 1H), 6.79 (td,  $J$  = 6.8, 1.2 Hz, 1H), 4.83 (s, 2H), 3.84 (s, 3H), 2.71 (s, 3H); <sup>13</sup>C NMR (100 MHz, CDCl<sub>3</sub>)  $\delta$  159.93, 150.46, 145.56, 145.27, 135.64, 129.70, 129.51, 124.96, 124.70, 121.29, 118.80, 117.59, 116.49, 114.71, 114.31, 113.90, 112.66, 55.44, 46.05, 36.33; HRMS (ESI)  $m/z$ : [M + H]<sup>+</sup> Calcd for C<sub>22</sub>H<sub>22</sub>N<sub>3</sub>O 344.1757; Found 344.1757.

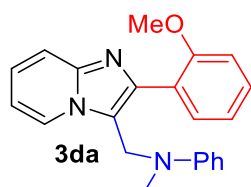

*N*-((2-(2-Methoxyphenyl)imidazo[1,2-*a*]pyridin-3-yl)methyl)-*N*-methylaniline. Compound **3da** (57 mg, Yield = 83%, R<sub>f</sub> = 0.2 (PE/EA = 5:1)) was isolated as a light brown solid; mp 84–86 °C. <sup>1</sup>H NMR (400 MHz, CDCl<sub>3</sub>)  $\delta$  8.05 (d,  $J$  = 6.9 Hz, 1H), 7.66 (d,  $J$  = 8.9 Hz, 1H), 7.56 (dd,  $J$  = 7.5, 1.8 Hz, 1H), 7.41–7.36 (m, 1H), 7.30–7.24 (m, 2H), 7.21–7.15 (m, 1H), 7.07 (t,  $J$  = 7.4 Hz, 1H), 6.98 (d,  $J$  = 8.3 Hz, 1H), 6.93 (d,  $J$  = 7.9 Hz, 2H), 6.81 (t,  $J$  = 7.3 Hz, 1H), 6.74 (td,  $J$  = 6.8, 1.2 Hz, 1H), 4.65 (s, 2H), 3.79 (s, 3H), 2.65 (s, 3H); <sup>13</sup>C NMR (100 MHz, CDCl<sub>3</sub>)  $\delta$  156.95, 150.58, 145.38, 142.35, 132.32, 129.84, 129.41, 124.81, 124.28, 123.38, 120.93, 118.23, 118.05, 117.58, 114.30, 112.38, 111.07, 55.54, 46.42, 36.24; HRMS (ESI)  $m/z$ : [M + H]<sup>+</sup> Calcd for C<sub>22</sub>H<sub>22</sub>N<sub>3</sub>O 344.1757; Found 344.1755.

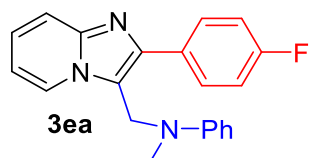

*N*-((2-(4-Fluorophenyl)imidazo[1,2-*a*]pyridin-3-yl)methyl)-*N*-methylaniline. Compound **3ea** (62 mg, Yield = 94%,  $R_f = 0.3$  (PE/EA = 5:1)) was isolated as a light brown solid; mp 101–102 °C.  $^1\text{H}$  NMR (400 MHz,  $\text{CDCl}_3$ )  $\delta$  8.08–8.02 (m, 1H), 7.78–7.73 (m, 2H), 7.69–7.65 (m, 1H), 7.36–7.29 (m, 2H), 7.26–7.20 (m, 1H), 7.18–7.12 (m, 2H), 7.03–6.96 (m, 2H), 6.91–6.86 (m, 1H), 6.82–6.76 (m, 1H), 4.78 (s, 2H), 2.69 (s, 3H);  $^{13}\text{C}$  NMR (100 MHz,  $\text{CDCl}_3$ )  $\delta$  162.68 (d,  $J = 246.2$  Hz), 150.30, 145.21, 144.67, 130.45 (d,  $J = 8.1$  Hz), 129.44, 124.95, 124.57, 118.85, 117.43, 116.13, 115.63 (d,  $J = 21.2$  Hz), 114.70, 112.58, 46.00, 36.25, (1C is merged with other peaks);  $^{19}\text{F}$  NMR (376 MHz,  $\text{CDCl}_3$ )  $\delta$  –113.75 (s, 1F). HRMS (ESI)  $m/z$ :  $[\text{M} + \text{H}]^+$  Calcd for  $\text{C}_{21}\text{H}_{19}\text{N}_3\text{F}$  332.1558; Found 332.1558.

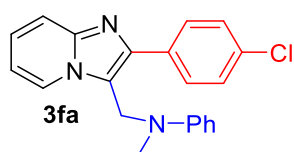

*N*-((2-(4-Chlorophenyl)imidazo[1,2-*a*]pyridin-3-yl)methyl)-*N*-methylaniline. Compound **3fa** (64 mg, Yield = 92%,  $R_f = 0.3$  (PE/EA = 5:1)) was isolated as a light brown solid; mp 134–136 °C.  $^1\text{H}$  NMR (400 MHz,  $\text{CDCl}_3$ )  $\delta$  8.06 (dt,  $J = 6.9, 1.2$  Hz, 1H), 7.80–7.71 (m, 2H), 7.67 (d,  $J = 9.1$  Hz, 1H), 7.44–7.40 (m, 2H), 7.36–7.29 (m, 2H), 7.27–7.22 (m, 1H), 6.99 (d,  $J = 7.8$  Hz, 2H), 6.89 (t,  $J = 7.3$  Hz, 1H), 6.82–6.76 (m, 1H), 4.78 (s, 2H), 2.69 (s, 3H);  $^{13}\text{C}$  NMR (100 MHz,  $\text{CDCl}_3$ )  $\delta$  150.31, 145.31, 144.44, 133.99, 132.82, 129.99, 129.48, 128.88, 125.07, 124.61, 118.95, 117.53, 116.46, 114.77, 112.69, 46.06, 36.32; HRMS (ESI)  $m/z$ :  $[\text{M} + \text{H}]^+$  Calcd for  $\text{C}_{21}\text{H}_{19}\text{N}_3\text{Cl}$  348.1262; Found 348.1263.

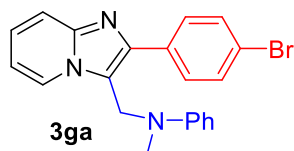

*N*-((2-(4-Bromophenyl)imidazo[1,2-*a*]pyridin-3-yl)methyl)-*N*-methylaniline. Compound **3ga** (67 mg, Yield = 86%,  $R_f = 0.3$  (PE/EA = 5:1)) was isolated as a light brown solid; mp 108–109 °C.  $^1\text{H}$  NMR (400 MHz,  $\text{CDCl}_3$ )  $\delta$  8.11–8.04 (m, 1H), 7.71–7.64 (m, 3H), 7.62–7.55 (m, 2H), 7.38–7.29

(m, 2H), 7.27–7.21 (m, 1H), 7.04–6.96 (m, 2H), 6.93–6.86 (m, 1H), 6.83–6.76 (m, 1H), 4.78 (s, 2H), 2.69 (s, 3H);  $^{13}\text{C}$  NMR (100 MHz,  $\text{CDCl}_3$ )  $\delta$  150.34, 145.36, 144.45, 133.27, 131.85, 130.32, 129.50, 125.13, 124.65, 122.30, 119.00, 117.56, 116.53, 114.83, 112.74, 46.11, 36.38; HRMS (ESI)  $m/z$ :  $[\text{M} + \text{H}]^+$  Calcd for  $\text{C}_{21}\text{H}_{19}\text{N}_3\text{Br}$  392.0757; Found 392.0756.

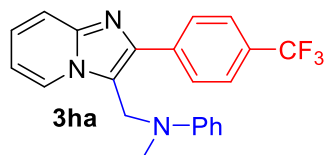

*N*-Methyl-*N*-((2-(4-(trifluoromethyl)phenyl)imidazo[1,2-*a*]pyridin-3-yl)methyl)aniline.

Compound **3ha** (61 mg, Yield = 80%,  $R_f$  = 0.3 (PE/EA = 5:1)) was isolated as a light brown paste.  $^1\text{H}$  NMR (400 MHz,  $\text{CDCl}_3$ )  $\delta$  8.10 (dt,  $J$  = 6.9, 1.1 Hz, 1H), 7.95–7.91 (m, 2H), 7.74–7.67 (m, 3H), 7.36–7.31 (m, 2H), 7.29–7.24 (m, 1H), 7.02–6.97 (m, 2H), 6.90 (tt,  $J$  = 7.3, 1.1 Hz, 1H), 6.82 (td,  $J$  = 6.8, 1.2 Hz, 1H), 4.82 (s, 2H), 2.71 (s, 3H);  $^{13}\text{C}$  NMR (100 MHz,  $\text{CDCl}_3$ )  $\delta$  150.37, 145.52, 144.13, 137.96, 129.94 (q,  $J$  = 32.2 Hz), 129.58, 129.04, 125.63 (q,  $J$  = 3.8 Hz), 125.41, 124.80, 124.34 (q,  $J$  = 270.8 Hz), 119.22, 117.79, 117.22, 114.99, 112.98, 46.23, 36.53;  $^{19}\text{F}$  NMR (376 MHz,  $\text{CDCl}_3$ )  $\delta$  –62.30 (s, 3F). HRMS (ESI)  $m/z$ :  $[\text{M} + \text{H}]^+$  Calcd for  $\text{C}_{21}\text{H}_{19}\text{N}_3\text{F}_3$  382.1526; Found 382.1524.

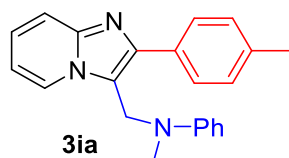

*N*-Methyl-*N*-((2-(*p*-tolyl)imidazo[1,2-*a*]pyridin-3-yl)methyl)aniline. Compound **3ia** (56 mg, Yield = 86%,  $R_f$  = 0.3 (PE/EA = 5:1)) was isolated as a light brown solid; mp 96–97 °C.  $^1\text{H}$  NMR (400 MHz,  $\text{CDCl}_3$ )  $\delta$  8.05 (dt,  $J$  = 6.9, 1.4 Hz, 1H), 7.72–7.65 (m, 3H), 7.35–7.30 (m, 2H), 7.28 (d,  $J$  = 7.7 Hz, 2H), 7.25–7.20 (m, 1H), 7.03–6.97 (m, 2H), 6.87 (tt,  $J$  = 7.4, 1.1 Hz, 1H), 6.77 (tt,  $J$  = 6.9, 1.1 Hz, 1H), 4.82 (s, 2H), 2.70 (s, 3H), 2.41 (s, 3H);  $^{13}\text{C}$  NMR (100 MHz,  $\text{CDCl}_3$ )  $\delta$  150.45, 145.73, 145.27, 137.85, 131.37, 129.47, 129.43, 128.70, 124.74, 124.61, 118.64, 117.45, 116.02, 114.58, 112.46, 46.01, 36.12, 21.37; HRMS (ESI)  $m/z$ :  $[\text{M} + \text{H}]^+$  Calcd for  $\text{C}_{22}\text{H}_{22}\text{N}_3$  328.1808; Found 328.1807.

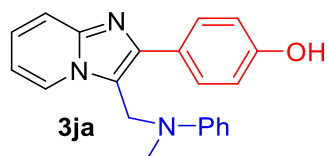

4-(3-((Methyl(phenyl)amino)methyl)imidazo[1,2-*a*]pyridin-2-yl)phenol. Compound **3ja** (57 mg, Yield = 87%,  $R_f = 0.2$  (PE/EA = 2:1)) was isolated as a light brown paste.  $^1\text{H}$  NMR (400 MHz,  $\text{CDCl}_3$ )  $\delta$  8.07 (d,  $J = 7.0$  Hz, 1H), 7.70 (d,  $J = 9.1$  Hz, 1H), 7.51 (d,  $J = 8.7$  Hz, 2H), 7.35–7.28 (m, 2H), 7.25–7.20 (m, 1H), 6.98 (d,  $J = 7.7$  Hz, 2H), 6.89–6.83 (m, 3H), 6.82–6.77 (m, 1H), 4.80 (s, 2H), 2.70 (s, 3H);  $^{13}\text{C}$  NMR (100 MHz,  $\text{CDCl}_3$ )  $\delta$  158.02, 150.50, 145.40, 144.94, 130.30, 129.53, 125.41, 124.78, 124.22, 118.80, 116.77, 116.19, 115.77, 114.77, 112.91, 46.07, 36.47; HRMS (ESI)  $m/z$ :  $[\text{M} + \text{H}]^+$  Calcd for  $\text{C}_{21}\text{H}_{20}\text{N}_3\text{O}$  330.1601; Found 330.1603.

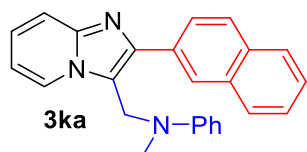

*N*-Methyl-*N*-((2-(naphthalen-2-yl)imidazo[1,2-*a*]pyridin-3-yl)methyl)aniline. Compound **3ka** (54 mg, Yield = 74%,  $R_f = 0.2$  (PE/EA = 5:1)) was isolated as a light brown paste.  $^1\text{H}$  NMR (400 MHz,  $\text{CDCl}_3$ )  $\delta$  8.26 (s, 1H), 8.11–8.05 (m, 1H), 8.00–7.91 (m, 2H), 7.90–7.83 (m, 2H), 7.75–7.70 (m, 1H), 7.54–7.46 (m, 2H), 7.37–7.29 (m, 2H), 7.28–7.21 (m, 1H), 7.05–6.96 (m, 2H), 6.93–6.87 (m, 1H), 6.81–6.76 (m, 1H), 4.86 (s, 2H), 2.71 (s, 3H);  $^{13}\text{C}$  NMR (100 MHz,  $\text{CDCl}_3$ )  $\delta$  150.35, 145.47, 145.34, 133.45, 132.94, 131.67, 129.45, 128.37, 128.31, 127.85, 127.73, 126.60, 126.31, 126.26, 124.92, 124.59, 118.77, 117.47, 116.69, 114.70, 112.57, 46.10, 36.30; HRMS (ESI)  $m/z$ :  $[\text{M} + \text{H}]^+$  Calcd for  $\text{C}_{25}\text{H}_{22}\text{N}_3$  364.1808; Found 364.1807.

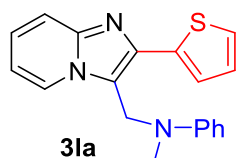

*N*-Methyl-*N*-((2-(thiophen-2-yl)imidazo[1,2-*a*]pyridin-3-yl)methyl)aniline. Compound **3la** (57 mg, Yield = 89%,  $R_f = 0.3$  (PE/EA = 5:1)) was isolated as a light brown paste; mp 120–122 °C.  $^1\text{H}$  NMR (400 MHz,  $\text{CDCl}_3$ )  $\delta$  8.00 (dt,  $J = 6.9, 1.2$  Hz, 1H), 7.65 (dt,  $J = 9.1, 1.2$  Hz, 1H), 7.49 (dd,  $J = 3.7, 1.2$  Hz, 1H), 7.40–7.30 (m, 3H), 7.21 (ddd,  $J = 9.1, 6.8, 1.3$  Hz, 1H), 7.12 (dd,  $J = 5.1, 3.6$  Hz, 1H), 7.06–6.99 (m, 2H), 6.92–6.86 (m, 1H), 6.76 (td,  $J = 6.8, 1.3$  Hz, 1H), 4.88 (s, 2H), 2.71 (s, 3H);  $^{13}\text{C}$

NMR (100 MHz, CDCl<sub>3</sub>)  $\delta$  150.51, 145.29, 139.85, 137.14, 129.53, 127.81, 126.03, 125.57, 125.20, 124.52, 118.86, 117.34, 115.73, 114.74, 112.69, 45.97, 36.45; HRMS (ESI)  $m/z$ : [M + H]<sup>+</sup> Calcd for C<sub>19</sub>H<sub>18</sub>N<sub>3</sub>S 320.1216; Found 320.1218.

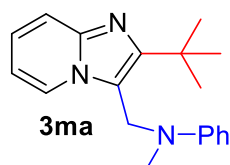

*N*-((2-(Tert-butyl)imidazo[1,2-*a*]pyridin-3-yl)methyl)-*N*-methylaniline. Compound **3ma** (51 mg, Yield = 87%, R<sub>f</sub> = 0.3 (PE/EA = 10:1)) was isolated as a light brown solid; mp 109–110 °C. <sup>1</sup>H NMR (400 MHz, CDCl<sub>3</sub>)  $\delta$  7.94 (dt, *J* = 6.9, 1.3 Hz, 1H), 7.63 (dt, *J* = 9.1, 1.2 Hz, 1H), 7.40–7.33 (m, 2H), 7.19–7.13 (m, 1H), 7.05–6.99 (m, 2H), 6.91–6.85 (m, 1H), 6.71 (td, *J* = 6.8, 1.2 Hz, 1H), 4.82 (s, 2H), 2.63 (s, 3H), 1.51 (s, 9H); <sup>13</sup>C NMR (100 MHz, CDCl<sub>3</sub>)  $\delta$  154.28, 150.49, 143.90, 129.55, 124.32, 124.00, 118.46, 117.12, 114.39, 114.30, 112.17, 45.92, 35.12, 33.63, 31.44; HRMS (ESI)  $m/z$ : [M + H]<sup>+</sup> Calcd for C<sub>19</sub>H<sub>24</sub>N<sub>3</sub> 294.1965; Found 294.1964.

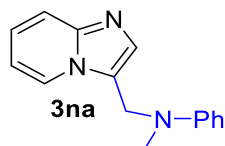

*N*-(Imidazo[1,2-*a*]pyridin-3-ylmethyl)-*N*-methylaniline. Compound **3na** (40 mg, Yield = 85%, R<sub>f</sub> = 0.2 (PE/EA = 2:1)) was isolated as a light brown solid; mp 77–78 °C. <sup>1</sup>H NMR (400 MHz, CDCl<sub>3</sub>)  $\delta$  8.01–7.96 (m, 1H), 7.65–7.61 (m, 1H), 7.56 (s, 1H), 7.33–7.28 (m, 2H), 7.20–7.15 (m, 1H), 7.00–6.94 (m, 2H), 6.87–6.82 (m, 1H), 6.76 (tt, *J* = 6.8, 1.3 Hz, 1H), 4.67 (s, 2H), 2.77 (s, 3H); <sup>13</sup>C NMR (100 MHz, CDCl<sub>3</sub>)  $\delta$  150.32, 146.35, 133.57, 129.43, 124.35, 124.24, 120.62, 118.58, 117.90, 114.51, 112.43, 46.94, 37.27; HRMS (ESI)  $m/z$ : [M + H]<sup>+</sup> Calcd for C<sub>15</sub>H<sub>16</sub>N<sub>3</sub> 238.1339; Found 238.1339.

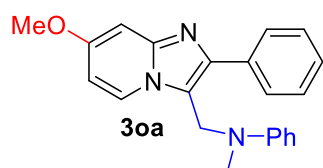



*N*-((7-Methoxy-2-phenylimidazo[1,2-*a*]pyridin-3-yl)methyl)-*N*-methylaniline. Compound **3oa** (40 mg, Yield = 58%,  $R_f = 0.2$  (PE/EA = 5:1)) was isolated as a light brown solid; mp 115–116 °C.  $^1\text{H}$  NMR (400 MHz,  $\text{CDCl}_3$ )  $\delta$  7.87 (d,  $J = 7.6$  Hz, 1H), 7.79–7.74 (m, 2H), 7.47–7.42 (m, 2H), 7.39–7.36 (m, 1H), 7.34–7.29 (m, 2H), 7.00–6.94 (m, 3H), 6.86 (tt,  $J = 7.3, 1.1$  Hz, 1H), 6.50 (dd,  $J = 7.5, 2.5$  Hz, 1H), 4.78 (s, 2H), 3.87 (s, 3H), 2.70 (s, 3H);  $^{13}\text{C}$  NMR (100 MHz,  $\text{CDCl}_3$ )  $\delta$  158.18, 150.49, 146.82, 145.10, 134.44, 129.49, 128.67, 128.64, 127.86, 125.18, 118.72, 115.15, 114.67, 107.52, 94.75, 55.60, 46.04, 36.13; HRMS (ESI)  $m/z$ :  $[\text{M} + \text{H}]^+$  Calcd for  $\text{C}_{22}\text{H}_{22}\text{N}_3\text{O}$  344.1757; Found 344.1755.

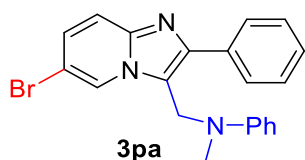

*N*-((6-Bromo-2-phenylimidazo[1,2-*a*]pyridin-3-yl)methyl)-*N*-methylaniline. Compound **3pa** (65 mg, Yield = 83%,  $R_f = 0.3$  (PE/EA = 5:1)) was isolated as a light brown solid; mp 157–158 °C.  $^1\text{H}$  NMR (400 MHz,  $\text{CDCl}_3$ )  $\delta$  8.24–8.20 (m, 1H), 7.79–7.73 (m, 2H), 7.58–7.53 (m, 1H), 7.50–7.44 (m, 2H), 7.42–7.37 (m, 1H), 7.35–7.24 (m, 3H), 7.03–6.96 (m, 2H), 6.94–6.87 (m, 1H), 4.77 (s, 2H), 2.70 (s, 3H);  $^{13}\text{C}$  NMR (100 MHz,  $\text{CDCl}_3$ )  $\delta$  150.47, 146.39, 143.68, 133.80, 129.46, 128.80, 128.75, 128.28, 128.22, 124.83, 119.33, 118.13, 116.91, 115.30, 107.19, 46.54, 36.95; HRMS (ESI)  $m/z$ :  $[\text{M} + \text{H}]^+$  Calcd for  $\text{C}_{21}\text{H}_{19}\text{N}_3\text{Br}$  392.0757; Found 392.0758.

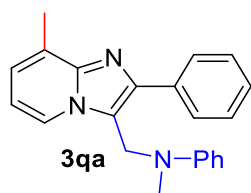

*N*-Methyl-*N*-((8-methyl-2-phenylimidazo[1,2-*a*]pyridin-3-yl)methyl)aniline. Compound **3qa** (54 mg, Yield = 83%,  $R_f = 0.3$  (PE/EA = 10:1)) was isolated as a light brown solid; mp 100–102 °C.  $^1\text{H}$  NMR (400 MHz,  $\text{CDCl}_3$ )  $\delta$  7.94 (d,  $J = 6.9$  Hz, 1H), 7.84–7.79 (m, 2H), 7.51–7.45 (m, 2H), 7.42–7.37 (m, 1H), 7.36–7.30 (m, 2H), 7.04 (dt,  $J = 6.9, 1.2$  Hz, 1H), 7.02–6.98 (m, 2H), 6.89 (tt,  $J = 7.3, 1.1$  Hz, 1H), 6.71 (t,  $J = 6.9$  Hz, 1H), 4.82 (s, 2H), 2.72 (s, 3H), 2.72 (s, 3H);  $^{13}\text{C}$  NMR (100 MHz,  $\text{CDCl}_3$ )  $\delta$  150.35, 145.64, 145.18, 134.47, 129.35, 128.93, 128.58, 127.81, 127.37, 123.54, 122.33, 118.43, 116.51, 114.39, 112.48, 45.87, 35.95, 17.19; HRMS (ESI)  $m/z$ :  $[\text{M} + \text{H}]^+$  Calcd for  $\text{C}_{22}\text{H}_{22}\text{N}_3$

328.1808; Found 328.1808.  $^1\text{H}$  NMR and  $^{13}\text{C}$  NMR data are consistent with the reported values.<sup>4</sup>

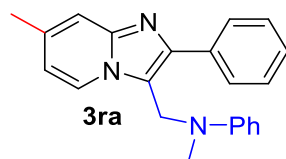

*N*-Methyl-*N*-((7-methyl-2-phenylimidazo[1,2-*a*]pyridin-3-yl)methyl)aniline. Compound **3ra** (49 mg, Yield = 75%,  $R_f$  = 0.3 (PE/EA = 5:1)) was isolated as a light brown paste.  $^1\text{H}$  NMR (400 MHz,  $\text{CDCl}_3$ )  $\delta$  7.94 (d,  $J$  = 7.0 Hz, 1H), 7.79–7.75 (m, 2H), 7.49–7.42 (m, 3H), 7.40–7.36 (m, 1H), 7.34–7.29 (m, 2H), 7.02–6.96 (m, 2H), 6.87 (tt,  $J$  = 7.3, 1.1 Hz, 1H), 6.63 (dd,  $J$  = 7.1, 1.7 Hz, 1H), 4.81 (s, 2H), 2.70 (s, 3H), 2.42 (s, 3H);  $^{13}\text{C}$  NMR (100 MHz,  $\text{CDCl}_3$ )  $\delta$  150.47, 145.78, 145.39, 135.84, 134.46, 129.47, 128.78, 128.67, 127.91, 123.86, 118.60, 115.95, 115.67, 115.18, 114.55, 45.96, 36.03, 21.46; HRMS (ESI)  $m/z$ :  $[\text{M} + \text{H}]^+$  Calcd for  $\text{C}_{22}\text{H}_{22}\text{N}_3$  328.1808; Found 328.1808.

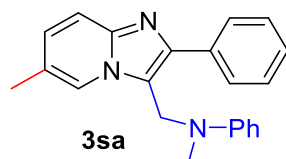

*N*-Methyl-*N*-((6-methyl-2-phenylimidazo[1,2-*a*]pyridin-3-yl)methyl)aniline. Compound **3sa** (54 mg, Yield = 82%,  $R_f$  = 0.3 (PE/EA = 5:1)) was isolated as a light brown solid; mp 81–83 °C.  $^1\text{H}$  NMR (400 MHz,  $\text{CDCl}_3$ )  $\delta$  7.84–7.81 (m, 1H), 7.79–7.76 (m, 2H), 7.63 (d,  $J$  = 9.1 Hz, 1H), 7.48–7.43 (m, 2H), 7.40–7.30 (m, 3H), 7.12 (dd,  $J$  = 9.1, 1.7 Hz, 1H), 7.03–6.98 (m, 2H), 6.88 (tt,  $J$  = 7.3, 1.0 Hz, 1H), 4.80 (s, 2H), 2.71 (s, 3H), 2.29 (s, 3H);  $^{13}\text{C}$  NMR (100 MHz,  $\text{CDCl}_3$ )  $\delta$  150.52, 145.51, 144.37, 134.41, 129.41, 128.70, 128.64, 128.01, 127.88, 122.18, 118.61, 116.83, 115.93, 114.62, 46.02, 35.98, 18.49; HRMS (ESI)  $m/z$ :  $[\text{M} + \text{H}]^+$  Calcd for  $\text{C}_{22}\text{H}_{22}\text{N}_3$  328.1808; Found 328.1807.

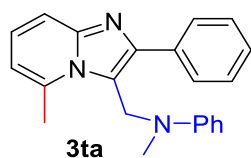

*N*-Methyl-*N*-((5-methyl-2-phenylimidazo[1,2-*a*]pyridin-3-yl)methyl)aniline. Compound **3ta** (37 mg, Yield = 57%,  $R_f$  = 0.25 (PE/EA = 5:1)) was isolated as a light brown solid; mp 197–199 °C.  $^1\text{H}$  NMR (400 MHz,  $\text{CDCl}_3$ )  $\delta$  7.70–7.63 (m, 2H), 7.57 (d,  $J$  = 9.0 Hz, 1H), 7.46–7.40 (m, 2H), 7.39–7.35 (m, 1H), 7.34–7.29 (m, 2H), 7.14 (dd,  $J$  = 9.0, 6.8 Hz, 1H), 6.91–6.81 (m, 3H), 6.56 (dt,  $J$  =

6.9, 1.1 Hz, 1H), 4.82 (s, 2H), 2.78 (s, 3H), 2.64 (s, 3H);  $^{13}\text{C}$  NMR (100 MHz,  $\text{CDCl}_3$ )  $\delta$  149.29, 148.14, 147.37, 137.09, 134.52, 129.45, 129.26, 128.65, 128.07, 125.47, 118.06, 117.13, 115.89, 113.94, 113.65, 45.43, 34.78, 19.28; HRMS (ESI)  $m/z$ :  $[\text{M} + \text{H}]^+$  Calcd for  $\text{C}_{22}\text{H}_{22}\text{N}_3$  328.1808; Found 328.1811.

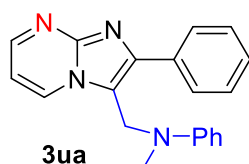

*N*-Methyl-*N*-((2-phenylimidazo[1,2-*a*]pyrimidin-3-yl)methyl)aniline. Compound **3ua** (58 mg, Yield = 93%,  $R_f$  = 0.3 (PE/EA = 2:1)) was isolated as a light brown solid; mp 156–158 °C.  $^1\text{H}$  NMR (400 MHz,  $\text{CDCl}_3$ )  $\delta$  8.54 (dd,  $J$  = 4.1, 2.0 Hz, 1H), 8.39 (dd,  $J$  = 6.9, 2.0 Hz, 1H), 7.86–7.81 (m, 2H), 7.49–7.44 (m, 2H), 7.42–7.38 (m, 1H), 7.33–7.27 (m, 2H), 7.00–6.94 (m, 2H), 6.88 (tt,  $J$  = 7.3, 1.1 Hz, 1H), 6.81 (dd,  $J$  = 6.9, 4.1 Hz, 1H), 4.84 (s, 2H), 2.69 (s, 3H);  $^{13}\text{C}$  NMR (100 MHz,  $\text{CDCl}_3$ )  $\delta$  150.27, 149.93, 148.30, 146.82, 133.59, 132.56, 129.53, 129.00, 128.71, 128.46, 119.32, 115.11, 115.08, 108.69, 46.43, 37.00; HRMS (ESI)  $m/z$ :  $[\text{M} + \text{H}]^+$  Calcd for  $\text{C}_{20}\text{H}_{19}\text{N}_4$  315.1604; Found 315.1601.

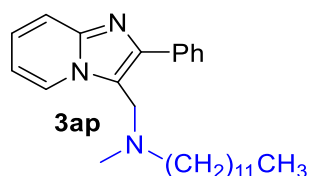

*N*-Methyl-*N*-((2-phenylimidazo[1,2-*a*]pyridin-3-yl)methyl)dodecan-1-amine. Compound **3ap** (73 mg, Yield = 90%,  $R_f$  = 0.3 (PE/EA = 5:1)) was isolated as a light yellow oil.  $^1\text{H}$  NMR (400 MHz,  $\text{CDCl}_3$ )  $\delta$  8.44 (dt,  $J$  = 6.9, 1.2 Hz, 1H), 7.84–7.77 (m, 2H), 7.62 (dt,  $J$  = 9.1, 1.2 Hz, 1H), 7.47–7.42 (m, 2H), 7.39–7.32 (m, 1H), 7.19 (ddd,  $J$  = 9.1, 6.7, 1.3 Hz, 1H), 6.79 (td,  $J$  = 6.8, 1.2 Hz, 1H), 3.94 (s, 2H), 2.38 (t,  $J$  = 7.3 Hz, 2H), 2.17 (s, 3H), 1.50–1.42 (m, 2H), 1.30–1.18 (m, 18H), 0.87 (t,  $J$  = 7.1 Hz, 3H);  $^{13}\text{C}$  NMR (100 MHz,  $\text{CDCl}_3$ )  $\delta$  145.05, 144.85, 134.79, 129.02, 128.48, 127.69, 125.69, 124.49, 117.59, 117.23, 111.73, 57.20, 51.77, 41.68, 32.03, 29.78, 29.75, 29.72, 29.57, 29.46, 27.41, 27.33, 22.80, 14.24, (1C is merged with other peaks); HRMS (ESI)  $m/z$ :  $[\text{M} + \text{H}]^+$  Calcd for  $\text{C}_{27}\text{H}_{40}\text{N}_3$  406.3217; Found 406.3220.

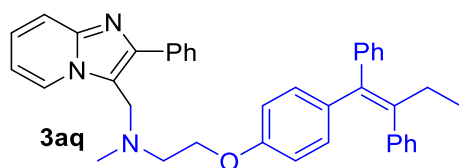

(*Z*)-2-(4-(1,2-Diphenylbut-1-en-1-yl)phenoxy)-*N*-methyl-*N*-((2-phenylimidazo[1,2-*a*]pyridin-3-yl)methyl)ethan-1-amine. Compound **3aq** (92 mg, Yield = 82%,  $R_f = 0.3$  (PE/EA = 5:1)) was isolated as a light yellow paste.  $^1\text{H}$  NMR (400 MHz,  $\text{CDCl}_3$ )  $\delta$  8.48 (dt,  $J = 6.9, 1.2$  Hz, 1H), 7.78–7.75 (m, 2H), 7.64–7.59 (m, 1H), 7.46–7.40 (m, 2H), 7.37–7.33 (m, 3H), 7.30–7.27 (m, 1H), 7.25–7.23 (m, 2H), 7.21–7.14 (m, 3H), 7.14–7.10 (m, 3H), 6.78–6.74 (m, 2H), 6.68 (td,  $J = 6.8, 1.2$  Hz, 1H), 6.52–6.47 (m, 2H), 4.06 (s, 2H), 3.93 (t,  $J = 5.4$  Hz, 2H), 2.79 (t,  $J = 5.4$  Hz, 2H), 2.46 (q,  $J = 7.4$  Hz, 2H), 2.26 (s, 3H), 0.93 (t,  $J = 7.4$  Hz, 3H);  $^{13}\text{C}$  NMR (100 MHz,  $\text{CDCl}_3$ )  $\delta$  156.67, 145.16, 144.94, 143.90, 142.54, 141.52, 138.29, 135.78, 134.71, 132.05, 129.82, 129.58, 129.01, 128.55, 128.23, 128.00, 127.77, 126.66, 126.12, 126.00, 124.67, 117.18, 113.34, 111.87, 65.79, 55.80, 51.56, 42.44, 29.16, 13.73, (1C is merged with other peaks); HRMS (ESI)  $m/z$ :  $[\text{M} + \text{H}]^+$  Calcd for  $\text{C}_{39}\text{H}_{38}\text{N}_3\text{O}$  564.3009; Found 564.3012.

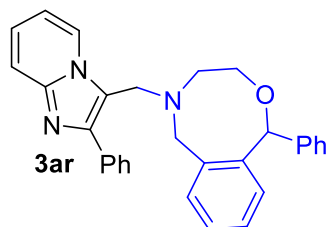

1-Phenyl-5-((2-phenylimidazo[1,2-*a*]pyridin-3-yl)methyl)-3,4,5,6-tetrahydro-1H-benzo[*f*][1,4]oxazocine. Compound **3ar** (65 mg, Yield = 73%,  $R_f = 0.3$  (PE/EA = 5:1)) was isolated as a light brown paste.  $^1\text{H}$  NMR (400 MHz,  $\text{CDCl}_3$ )  $\delta$  8.42 (d,  $J = 7.2$  Hz, 1H), 7.82–7.76 (m, 2H), 7.68 (d,  $J = 9.4$  Hz, 1H), 7.49–7.44 (m, 2H), 7.41–7.36 (m, 1H), 7.30–7.22 (m, 6H), 7.14–7.08 (m, 1H), 7.01–6.92 (m, 2H), 6.83–6.76 (m, 1H), 6.57 (d,  $J = 6.2$  Hz, 1H), 5.78 (s, 1H), 4.74 (d,  $J = 12.9$  Hz, 1H), 4.20 (d,  $J = 2.3$  Hz, 2H), 4.11 (ddd,  $J = 12.4, 8.0, 2.6$  Hz, 1H), 3.82 (ddd,  $J = 12.4, 6.1, 2.2$  Hz, 1H), 3.63 (d,  $J = 12.8$  Hz, 1H), 2.85 (ddd,  $J = 13.8, 8.0, 2.3$  Hz, 1H), 2.67 (ddd,  $J = 13.8, 6.1, 2.6$  Hz, 1H);  $^{13}\text{C}$  NMR (100 MHz,  $\text{CDCl}_3$ )  $\delta$  145.26, 142.78, 140.83, 134.62, 132.82, 129.09, 128.65, 128.56, 127.89, 127.68, 127.62, 127.44, 127.35, 125.91, 124.78, 117.28, 117.22, 111.94, 84.37,

68.89, 55.45, 52.35, 49.85, (3C are merged with other peaks); HRMS (ESI)  $m/z$ :  $[M + H]^+$  Calcd for  $C_{30}H_{28}N_3O$  446.2227; Found 446.2228.

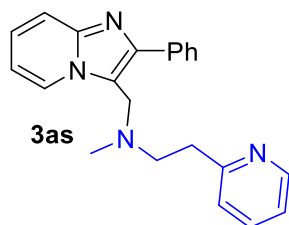

*N*-Methyl-*N*-((2-phenylimidazo[1,2-*a*]pyridin-3-yl)methyl)-2-(pyridin-2-yl)ethan-1-amine.

Compound **3as** (62 mg, Yield = 91%,  $R_f$  = 0.2 (PE/EA = 5:1)) was isolated as a light yellow paste.  $^1H$  NMR (400 MHz,  $CDCl_3$ )  $\delta$  8.46 (ddd,  $J$  = 4.9, 1.9, 0.9 Hz, 1H), 8.00 (dt,  $J$  = 6.9, 1.2 Hz, 1H), 7.78–7.73 (m, 2H), 7.56 (dt,  $J$  = 9.1, 1.1 Hz, 1H), 7.47 (td,  $J$  = 7.6, 1.9 Hz, 1H), 7.44–7.39 (m, 2H), 7.36–7.30 (m, 1H), 7.11 (ddd,  $J$  = 9.1, 6.7, 1.3 Hz, 1H), 7.06 (ddd,  $J$  = 7.5, 4.9, 1.2 Hz, 1H), 6.97 (dt,  $J$  = 7.8, 1.1 Hz, 1H), 6.56 (td,  $J$  = 6.8, 1.2 Hz, 1H), 3.97 (s, 2H), 2.97–2.91 (m, 2H), 2.89–2.84 (m, 2H), 2.22 (s, 3H);  $^{13}C$  NMR (100 MHz,  $CDCl_3$ )  $\delta$  160.39, 149.19, 144.97, 144.71, 136.26, 134.63, 128.94, 128.47, 127.68, 125.68, 124.46, 123.23, 121.21, 117.16, 116.98, 111.54, 56.91, 51.58, 41.23, 35.99; HRMS (ESI)  $m/z$ :  $[M + H]^+$  Calcd for  $C_{22}H_{23}N_4$  343.1917; Found 343.1918.

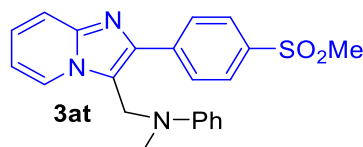

*N*-Methyl-*N*-((2-(4-(methylsulfonyl)phenyl)imidazo[1,2-*a*]pyridin-3-yl)methyl)aniline. Compound **3at** (64 mg, Yield = 82%,  $R_f$  = 0.3 (PE/EA = 1:1)) was isolated as a light brown paste.  $^1H$  NMR (400 MHz,  $CDCl_3$ )  $\delta$  8.12 (d,  $J$  = 7.0 Hz, 1H), 8.02 (s, 4H), 7.70 (d,  $J$  = 8.8 Hz, 1H), 7.37–7.27 (m, 3H), 7.03–6.96 (m, 2H), 6.94–6.89 (m, 1H), 6.87–6.82 (m, 1H), 4.83 (s, 2H), 3.09 (s, 3H), 2.71 (s, 3H);  $^{13}C$  NMR (100 MHz,  $CDCl_3$ )  $\delta$  150.18, 145.49, 143.31, 139.91, 139.45, 129.48, 129.41, 127.69, 125.55, 124.72, 119.29, 117.71, 115.02, 113.06, 46.20, 44.57, 36.61, (1C is merged with other peaks); HRMS (ESI)  $m/z$ :  $[M + H]^+$  Calcd for  $C_{22}H_{22}N_3OS$  392.1427; Found 392.1429.

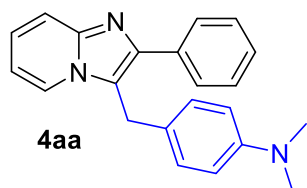

*N,N*-Dimethyl-4-((2-phenylimidazo[1,2-*a*]pyridin-3-yl)methyl)aniline. Compound **4aa** (43 mg, Yield = 66%,  $R_f = 0.25$  (PE/EA = 5:1)) was isolated as a light brown paste.  $^1\text{H}$  NMR (400 MHz,  $\text{CDCl}_3$ )  $\delta$  7.84–7.79 (m, 2H), 7.74 (dt,  $J = 6.9, 1.2$  Hz, 1H), 7.67 (dt,  $J = 9.1, 1.1$  Hz, 1H), 7.46–7.40 (m, 2H), 7.37–7.32 (m, 1H), 7.16 (ddd,  $J = 9.0, 6.7, 1.3$  Hz, 1H), 7.01 (d,  $J = 8.7$  Hz, 2H), 6.72–6.65 (m, 3H), 4.40 (s, 2H), 2.92 (s, 6H);  $^{13}\text{C}$  NMR (100 MHz,  $\text{CDCl}_3$ )  $\delta$  149.73, 144.92, 143.94, 134.78, 128.72, 128.50, 128.35, 127.73, 124.30, 124.14, 123.76, 118.62, 117.54, 113.25, 112.16, 40.78, 29.00; HRMS (ESI)  $m/z$ :  $[\text{M} + \text{H}]^+$  Calcd for  $\text{C}_{22}\text{H}_{22}\text{N}_3$  328.1808; Found 328.1808.  $^1\text{H}$  NMR and  $^{13}\text{C}$  NMR data are consistent with the reported values.<sup>8, 9</sup>

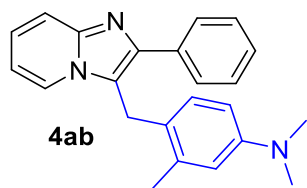

*N,N,3*-Trimethyl-4-((2-phenylimidazo[1,2-*a*]pyridin-3-yl)methyl)aniline. Compound **4ab** (42 mg, Yield = 59%,  $R_f = 0.25$  (PE/EA = 5:1)) was isolated as a light brown paste.  $^1\text{H}$  NMR (400 MHz,  $\text{CDCl}_3$ )  $\delta$  7.78–7.74 (m, 2H), 7.70 (dt,  $J = 9.0, 1.1$  Hz, 1H), 7.66 (dt,  $J = 6.9, 1.2$  Hz, 1H), 7.44–7.39 (m, 2H), 7.35–7.31 (m, 1H), 7.18 (ddd,  $J = 9.1, 6.7, 1.3$  Hz, 1H), 6.72–6.68 (m, 2H), 6.54 (d,  $J = 8.5$  Hz, 1H), 6.41 (dd,  $J = 8.5, 2.8$  Hz, 1H), 4.28 (s, 2H), 2.91 (s, 6H), 2.41 (s, 3H);  $^{13}\text{C}$  NMR (100 MHz,  $\text{CDCl}_3$ )  $\delta$  149.73, 144.94, 144.16, 137.03, 134.73, 128.68, 128.24, 127.65, 127.57, 124.08, 123.67, 122.40, 118.30, 117.52, 115.06, 112.17, 110.66, 40.73, 26.83, 20.40; HRMS (ESI)  $m/z$ :  $[\text{M} + \text{H}]^+$  Calcd for  $\text{C}_{23}\text{H}_{24}\text{N}_3$  342.1965; Found 342.1963.

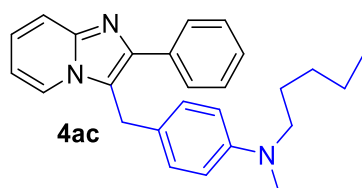

*N*-Methyl-*N*-pentyl-4-((2-phenylimidazo[1,2-*a*]pyridin-3-yl)methyl)aniline. Compound **4ac** (45 mg, Yield = 59%,  $R_f = 0.25$  (PE/EA = 5:1)) was isolated as a light brown paste.  $^1\text{H}$  NMR (400 MHz,

CDCl<sub>3</sub>)  $\delta$  7.84–7.80 (m, 2H), 7.76 (dt,  $J$  = 6.9, 1.2 Hz, 1H), 7.68 (dt,  $J$  = 9.0, 1.1 Hz, 1H), 7.46–7.40 (m, 2H), 7.37–7.32 (m, 1H), 7.17 (ddd,  $J$  = 9.1, 6.7, 1.2 Hz, 1H), 6.99 (d,  $J$  = 8.7 Hz, 2H), 6.70 (td,  $J$  = 6.8, 1.2 Hz, 1H), 6.65–6.59 (m, 2H), 4.39 (s, 2H), 3.26 (t,  $J$  = 7.5 Hz, 2H), 2.89 (s, 3H), 1.61–1.51 (m, 2H), 1.37–1.24 (m, 4H), 0.89 (t,  $J$  = 7.0 Hz, 3H); <sup>13</sup>C NMR (100 MHz, CDCl<sub>3</sub>)  $\delta$  148.46, 144.86, 143.83, 134.75, 128.71, 128.57, 128.35, 127.72, 124.16, 123.82, 123.36, 118.72, 117.50, 112.62, 112.16, 52.97, 38.41, 29.45, 28.96, 26.47, 22.72, 14.22; HRMS (ESI)  $m/z$ : [M + H]<sup>+</sup> Calcd for C<sub>26</sub>H<sub>30</sub>N<sub>3</sub> 384.2434; Found 384.2437.

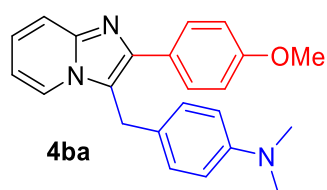

4-((2-(4-Methoxyphenyl)imidazo[1,2-*a*]pyridin-3-yl)methyl)-*N,N*-dimethylaniline. Compound **4ba** (49 mg, Yield = 69%,  $R_f$  = 0.2 (PE/EA = 5:1)) was isolated as a light brown paste. <sup>1</sup>H NMR (400 MHz, CDCl<sub>3</sub>)  $\delta$  7.80–7.68 (m, 3H), 7.65 (dt,  $J$  = 9.1, 1.2 Hz, 1H), 7.17–7.09 (m, 1H), 7.03–6.92 (m, 4H), 6.70–6.62 (m, 3H), 4.36 (s, 2H), 3.82 (s, 3H), 2.90 (s, 6H); <sup>13</sup>C NMR (100 MHz, CDCl<sub>3</sub>)  $\delta$  159.34, 149.66, 144.75, 143.72, 129.45, 128.43, 127.35, 124.35, 123.91, 123.57, 117.87, 117.25, 114.13, 113.20, 111.97, 55.35, 40.72, 28.93; HRMS (ESI)  $m/z$ : [M + H]<sup>+</sup> Calcd for C<sub>23</sub>H<sub>24</sub>N<sub>3</sub>O 358.1914; Found 358.1916. <sup>1</sup>H NMR and <sup>13</sup>C NMR data are consistent with the reported values.<sup>8</sup>

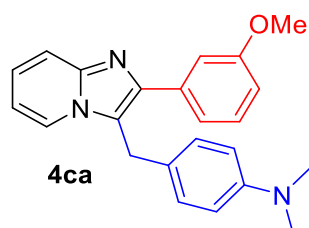

4-((2-(3-Methoxyphenyl)imidazo[1,2-*a*]pyridin-3-yl)methyl)-*N,N*-dimethylaniline. Compound **4ca** (42 mg, Yield = 59%,  $R_f$  = 0.2 (PE/EA = 5:1)) was isolated as a light brown paste. <sup>1</sup>H NMR (400 MHz, CDCl<sub>3</sub>)  $\delta$  7.75 (dt,  $J$  = 6.9, 1.2 Hz, 1H), 7.67 (dt,  $J$  = 9.1, 1.2 Hz, 1H), 7.40 (dd,  $J$  = 2.7, 1.5 Hz, 1H), 7.37–7.32 (m, 2H), 7.17 (ddd,  $J$  = 9.1, 6.7, 1.3 Hz, 1H), 7.03–6.98 (m, 2H), 6.90 (ddd,  $J$  = 7.9, 2.6, 1.4 Hz, 1H), 6.72–6.65 (m, 3H), 4.41 (s, 2H), 3.82 (s, 3H), 2.91 (s, 6H); <sup>13</sup>C NMR (100

MHz, CDCl<sub>3</sub>)  $\delta$  159.98, 149.74, 144.86, 143.83, 136.19, 129.68, 128.51, 124.36, 124.16, 123.75, 120.73, 118.84, 117.59, 114.16, 113.28, 112.20, 55.44, 40.80, 29.04, (1C is merged with other peaks); HRMS (ESI)  $m/z$ : [M + H]<sup>+</sup> Calcd for C<sub>23</sub>H<sub>24</sub>N<sub>3</sub>O 358.1914; Found 358.1915.

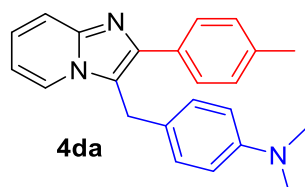

*N,N*-Dimethyl-4-((2-(*p*-tolyl)imidazo[1,2-*a*]pyridin-3-yl)methyl)aniline. Compound **4da** (42 mg, Yield = 61%,  $R_f$  = 0.25 (PE/EA = 5:1)) was isolated as a light brown paste. <sup>1</sup>H NMR (400 MHz, CDCl<sub>3</sub>)  $\delta$  7.75–7.63 (m, 4H), 7.27–7.22 (m, 2H), 7.18–7.11 (m, 1H), 7.01 (d,  $J$  = 12.2 Hz, 2H), 6.72–6.62 (m, 3H), 4.38 (s, 2H), 2.91 (s, 6H), 2.39 (s, 3H); <sup>13</sup>C NMR (100 MHz, CDCl<sub>3</sub>)  $\delta$  149.68, 144.81, 143.93, 137.45, 131.85, 129.41, 128.48, 128.18, 124.38, 123.98, 123.65, 118.31, 117.39, 113.21, 112.03, 40.74, 28.99, 21.37; HRMS (ESI)  $m/z$ : [M + H]<sup>+</sup> Calcd for C<sub>23</sub>H<sub>24</sub>N<sub>3</sub> 342.1965; Found 342.1962. <sup>1</sup>H NMR and <sup>13</sup>C NMR data are consistent with the reported values.<sup>8</sup>

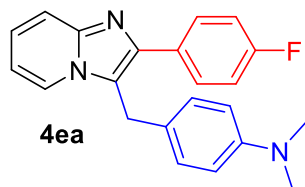

4-((2-(4-Fluorophenyl)imidazo[1,2-*a*]pyridin-3-yl)methyl)-*N,N*-dimethylaniline. Compound **4ea** (46 mg, Yield = 67%,  $R_f$  = 0.3 (PE/EA = 2:1)) was isolated as a light brown solid; mp 94–95 °C. <sup>1</sup>H NMR (400 MHz, CDCl<sub>3</sub>)  $\delta$  7.78–7.72 (m, 3H), 7.66 (dt,  $J$  = 9.1, 1.2 Hz, 1H), 7.17 (ddd,  $J$  = 9.1, 6.7, 1.3 Hz, 1H), 7.14–7.08 (m, 2H), 7.02–6.96 (m, 2H), 6.73–6.65 (m, 3H), 4.36 (s, 2H), 2.91 (s, 6H); <sup>13</sup>C NMR (100 MHz, CDCl<sub>3</sub>)  $\delta$  162.64 (d,  $J$  = 245.4 Hz), 149.76, 144.87, 143.03, 130.89 (d,  $J$  = 3.3 Hz), 129.97 (d,  $J$  = 8.1 Hz), 128.42, 124.30, 124.04, 123.75, 118.41, 117.47, 115.66 (d,  $J$  = 21.4 Hz), 113.24, 112.27, 40.75, 28.90; <sup>19</sup>F NMR (376 MHz, CDCl<sub>3</sub>)  $\delta$  –114.50 (s, 1F). HRMS (ESI)  $m/z$ : [M + H]<sup>+</sup> Calcd for C<sub>22</sub>H<sub>21</sub>N<sub>3</sub>F 346.1714; Found 346.1712.



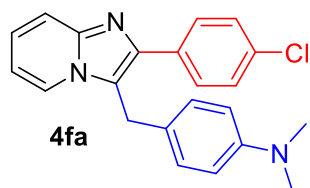

4-((2-(4-Chlorophenyl)imidazo[1,2-*a*]pyridin-3-yl)methyl)-*N,N*-dimethylaniline. Compound **4fa** (37 mg, Yield = 51%,  $R_f$  = 0.3 (PE/EA = 2:1)) was isolated as a light brown solid; mp 124–126 °C.  $^1\text{H}$  NMR (400 MHz,  $\text{CDCl}_3$ )  $\delta$  7.76–7.71 (m, 3H), 7.66 (dt,  $J$  = 9.1, 1.1 Hz, 1H), 7.41–7.36 (m, 2H), 7.18 (ddd,  $J$  = 9.1, 6.7, 1.3 Hz, 1H), 7.00–6.96 (m, 2H), 6.71 (td,  $J$  = 6.7, 1.1 Hz, 1H), 6.69–6.65 (m, 2H), 4.37 (s, 2H), 2.91 (s, 6H);  $^{13}\text{C}$  NMR (100 MHz,  $\text{CDCl}_3$ )  $\delta$  149.79, 144.97, 142.77, 133.66, 133.33, 129.53, 128.91, 128.43, 124.40, 123.94, 123.76, 118.80, 117.56, 113.26, 112.34, 40.74, 28.94; HRMS (ESI)  $m/z$ :  $[\text{M} + \text{H}]^+$  Calcd for  $\text{C}_{22}\text{H}_{21}\text{N}_3\text{Cl}$  362.1419; Found 362.1415.  $^1\text{H}$  NMR and  $^{13}\text{C}$  NMR data are consistent with the reported values.<sup>9</sup>

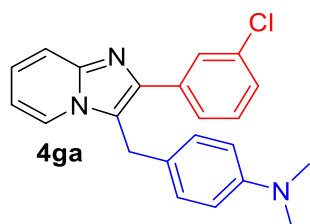

4-((2-(3-Chlorophenyl)imidazo[1,2-*a*]pyridin-3-yl)methyl)-*N,N*-dimethylaniline. Compound **4ga** (37 mg, Yield = 51%,  $R_f$  = 0.25 (PE/EA = 5:1)) was isolated as a light brown paste.  $^1\text{H}$  NMR (400 MHz,  $\text{CDCl}_3$ )  $\delta$  7.89–7.85 (m, 1H), 7.75 (dt,  $J$  = 6.8, 1.2 Hz, 1H), 7.68–7.62 (m, 2H), 7.36–7.29 (m, 2H), 7.18 (ddd,  $J$  = 9.0, 6.7, 1.3 Hz, 1H), 7.02–6.96 (m, 2H), 6.75–6.65 (m, 3H), 4.39 (s, 2H), 2.91 (s, 6H);  $^{13}\text{C}$  NMR (100 MHz,  $\text{CDCl}_3$ )  $\delta$  149.78, 144.96, 142.49, 136.71, 134.73, 129.91, 128.47, 128.40, 127.76, 126.30, 124.46, 123.93, 123.83, 119.18, 117.66, 113.27, 112.38, 40.75, 28.96; HRMS (ESI)  $m/z$ :  $[\text{M} + \text{H}]^+$  Calcd for  $\text{C}_{22}\text{H}_{21}\text{N}_3\text{Cl}$  362.1419; Found 362.1417.

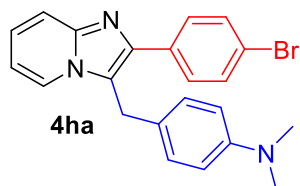

4-((2-(4-Bromophenyl)imidazo[1,2-*a*]pyridin-3-yl)methyl)-*N,N*-dimethylaniline. Compound **4ha** (55 mg, Yield = 68%,  $R_f$  = 0.25 (PE/EA = 5:1)) was isolated as a light brown solid; mp 108–110 °C.

$^1\text{H}$  NMR (400 MHz,  $\text{CDCl}_3$ )  $\delta$  7.73 (dt,  $J = 6.9, 1.2$  Hz, 1H), 7.70–7.63 (m, 3H), 7.56–7.50 (m, 2H), 7.17 (ddd,  $J = 9.1, 6.7, 1.3$  Hz, 1H), 7.01–6.94 (m, 2H), 6.73–6.62 (m, 3H), 4.35 (s, 2H), 2.91 (s, 6H);  $^{13}\text{C}$  NMR (100 MHz,  $\text{CDCl}_3$ )  $\delta$  149.74, 144.92, 142.68, 133.73, 131.81, 129.79, 128.38, 124.40, 123.84, 123.71, 121.85, 118.81, 117.51, 113.21, 112.32, 40.69, 28.89; HRMS (ESI)  $m/z$ :  $[\text{M} + \text{H}]^+$  Calcd for  $\text{C}_{22}\text{H}_{21}\text{N}_3\text{Br}$  406.0913; Found 406.0914.

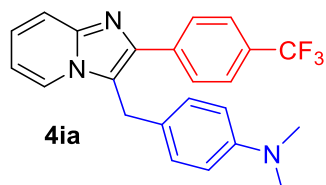

*N,N*-Dimethyl-4-((2-(4-(trifluoromethyl)phenyl)imidazo[1,2-*a*]pyridin-3-yl)methyl)aniline.

Compound **4ia** (40 mg, Yield = 50%,  $R_f = 0.25$  (PE/EA = 5:1)) was isolated as a light brown paste.  $^1\text{H}$  NMR (400 MHz,  $\text{CDCl}_3$ )  $\delta$  7.92 (d,  $J = 7.9$  Hz, 2H), 7.78 (dt,  $J = 6.8, 1.2$  Hz, 1H), 7.71–7.65 (m, 3H), 7.21 (ddd,  $J = 9.1, 6.7, 1.2$  Hz, 1H), 7.03–6.96 (m, 2H), 6.74 (td,  $J = 6.8, 1.2$  Hz, 1H), 6.70–6.65 (m, 2H), 4.41 (s, 2H), 2.92 (s, 6H);  $^{13}\text{C}$  NMR (100 MHz,  $\text{CDCl}_3$ )  $\delta$  149.84, 145.11, 142.41, 138.40, 129.22 (q,  $J = 32.2$  Hz), 128.42, 125.66 (q,  $J = 3.9$  Hz), 124.68, 124.45 (q,  $J = 271.0$  Hz), 123.85, 123.72, 119.56, 117.77, 113.28, 112.56, 40.75, 28.96, (1C is merged with other peaks);  $^{19}\text{F}$  NMR (376 MHz,  $\text{CDCl}_3$ )  $\delta$  -62.30 (s, 3F). HRMS (ESI)  $m/z$ :  $[\text{M} + \text{H}]^+$  Calcd for  $\text{C}_{23}\text{H}_{21}\text{N}_3\text{F}_3$  396.1682; Found 396.1683.

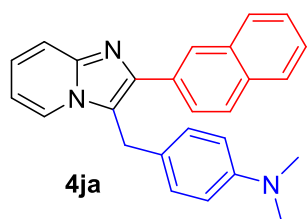

*N,N*-Dimethyl-4-((2-(naphthalen-2-yl)imidazo[1,2-*a*]pyridin-3-yl)methyl)aniline. Compound **4ja** (46 mg, Yield = 61%,  $R_f = 0.2$  (PE/EA = 5:1)) was isolated as a light brown paste.  $^1\text{H}$  NMR (400 MHz,  $\text{CDCl}_3$ )  $\delta$  8.30 (s, 1H), 7.97 (dd,  $J = 8.5, 1.8$  Hz, 1H), 7.93–7.83 (m, 3H), 7.79 (dt,  $J = 6.9, 1.2$  Hz, 1H), 7.73 (dt,  $J = 9.0, 1.1$  Hz, 1H), 7.51–7.45 (m, 2H), 7.20 (ddd,  $J = 9.0, 6.7, 1.3$  Hz, 1H), 7.01 (d,  $J = 8.6$  Hz, 2H), 6.76–6.67 (m, 3H), 4.48 (s, 2H), 2.93 (s, 6H);  $^{13}\text{C}$  NMR (100 MHz,  $\text{CDCl}_3$ )  $\delta$  149.71, 144.96, 143.70, 133.65, 132.92, 132.20, 128.52, 128.45, 128.29, 127.74, 127.15, 126.41,

126.17, 126.04, 124.27, 123.73, 119.09, 117.48, 113.25, 112.23, 40.73, 29.09, (1C is merged with other peaks); HRMS (ESI)  $m/z$ :  $[M + H]^+$  Calcd for  $C_{26}H_{24}N_3$  378.1965; Found 378.1962.

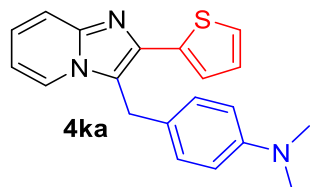

*N,N*-Dimethyl-4-((2-(thiophen-2-yl)imidazo[1,2-*a*]pyridin-3-yl)methyl)aniline. Compound **4ka** (47 mg, Yield = 70%,  $R_f$  = 0.25 (PE/EA = 5:1)) was isolated as a light brown paste.  $^1H$  NMR (400 MHz,  $CDCl_3$ )  $\delta$  7.75 (dt,  $J$  = 7.0, 1.2 Hz, 1H), 7.63 (dt,  $J$  = 9.1, 1.1 Hz, 1H), 7.42 (dd,  $J$  = 3.6, 1.1 Hz, 1H), 7.34 (dd,  $J$  = 5.1, 1.1 Hz, 1H), 7.14 (ddd,  $J$  = 9.2, 6.7, 1.3 Hz, 1H), 7.08 (dd,  $J$  = 5.1, 3.6 Hz, 1H), 7.05–6.99 (m, 2H), 6.70–6.62 (m, 3H), 4.44 (s, 2H), 2.89 (s, 6H);  $^{13}C$  NMR (100 MHz,  $CDCl_3$ )  $\delta$  149.71, 144.77, 138.31, 137.85, 128.53, 127.79, 125.47, 124.55, 124.37, 123.83, 123.45, 118.32, 117.31, 113.16, 112.29, 40.70, 28.95; HRMS (ESI)  $m/z$ :  $[M + H]^+$  Calcd for  $C_{20}H_{20}N_3S$  334.1372; Found 334.1375.  $^1H$  NMR and  $^{13}C$  NMR data are consistent with the reported values.<sup>8</sup>

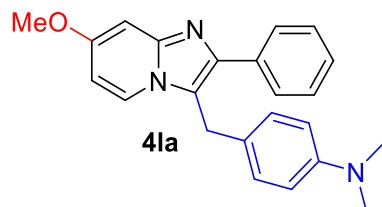

4-((7-Methoxy-2-phenylimidazo[1,2-*a*]pyridin-3-yl)methyl)-*N,N*-dimethylaniline. Compound **4la** (57 mg, Yield = 80%,  $R_f$  = 0.25 (PE/EA = 5:1)) was isolated as a light brown paste.  $^1H$  NMR (400 MHz,  $CDCl_3$ )  $\delta$  7.81–7.77 (m, 2H), 7.54 (dd,  $J$  = 7.5, 0.7 Hz, 1H), 7.44–7.38 (m, 2H), 7.35–7.29 (m, 1H), 7.04–6.98 (m, 2H), 6.95 (d,  $J$  = 2.6 Hz, 1H), 6.69–6.63 (m, 2H), 6.40 (dd,  $J$  = 7.4, 2.5 Hz, 1H), 4.34 (s, 2H), 3.85 (s, 3H), 2.91 (s, 6H);  $^{13}C$  NMR (100 MHz,  $CDCl_3$ )  $\delta$  157.73, 149.66, 146.19, 143.10, 134.89, 128.64, 128.45, 128.02, 127.46, 124.55, 124.22, 117.35, 113.20, 107.08, 94.72, 55.54, 40.75, 28.89; HRMS (ESI)  $m/z$ :  $[M + H]^+$  Calcd for  $C_{23}H_{24}N_3O$  358.1914; Found 358.1912.

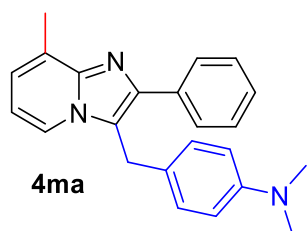

*N,N*-Dimethyl-4-((8-methyl-2-phenylimidazo[1,2-*a*]pyridin-3-yl)methyl)aniline. Compound **4ma** (40 mg, Yield = 59%,  $R_f = 0.4$  (PE/EA = 5:1)) was isolated as a light brown solid; mp 91–92 °C.  $^1\text{H}$  NMR (400 MHz,  $\text{CDCl}_3$ )  $\delta$  7.82–7.78 (m, 2H), 7.62 (d,  $J = 6.9$  Hz, 1H), 7.45–7.40 (m, 2H), 7.35–7.31 (m, 1H), 7.03–6.98 (m, 2H), 6.96 (d,  $J = 6.9$  Hz, 1H), 6.70–6.65 (m, 2H), 6.62 (t,  $J = 6.8$  Hz, 1H), 4.37 (s, 2H), 2.91 (s, 6H), 2.69 (s, 3H);  $^{13}\text{C}$  NMR (100 MHz,  $\text{CDCl}_3$ )  $\delta$  149.65, 145.34, 143.54, 135.09, 128.68, 128.53, 127.55, 127.45, 124.66, 122.91, 121.63, 118.94, 113.22, 112.13, 40.79, 29.08, 17.32, (1C is merged with other peaks); HRMS (ESI)  $m/z$ :  $[\text{M} + \text{H}]^+$  Calcd for  $\text{C}_{23}\text{H}_{24}\text{N}_3$  342.1965; Found 342.1966.  $^1\text{H}$  NMR and  $^{13}\text{C}$  NMR data are consistent with the reported values.<sup>8</sup>

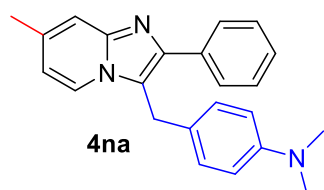

*N,N*-Dimethyl-4-((7-methyl-2-phenylimidazo[1,2-*a*]pyridin-3-yl)methyl)aniline. Compound **4na** (40 mg, Yield = 59%,  $R_f = 0.25$  (PE/EA = 5:1)) was isolated as a light brown paste.  $^1\text{H}$  NMR (400 MHz,  $\text{CDCl}_3$ )  $\delta$  7.83–7.78 (m, 2H), 7.60 (d,  $J = 7.0$  Hz, 1H), 7.44–7.39 (m, 3H), 7.35–7.30 (m, 1H), 7.02–6.98 (m, 2H), 6.69–6.65 (m, 2H), 6.51 (dd,  $J = 6.9, 1.7$  Hz, 1H), 4.36 (s, 2H), 2.91 (s, 6H), 2.37 (s, 3H);  $^{13}\text{C}$  NMR (100 MHz,  $\text{CDCl}_3$ )  $\delta$  149.65, 145.28, 143.44, 134.99, 134.90, 128.62, 128.44, 128.22, 127.52, 124.52, 122.94, 117.94, 115.86, 114.72, 113.19, 40.72, 28.90, 21.38; HRMS (ESI)  $m/z$ :  $[\text{M} + \text{H}]^+$  Calcd for  $\text{C}_{23}\text{H}_{24}\text{N}_3$  342.1965; Found 342.1962.

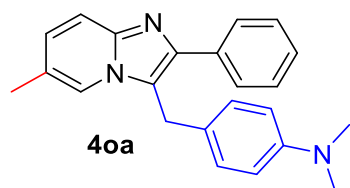

*N,N*-Dimethyl-4-((6-methyl-2-phenylimidazo[1,2-*a*]pyridin-3-yl)methyl)aniline. Compound **4oa** (31 mg, Yield = 46%,  $R_f = 0.25$  (PE/EA = 5:1)) was isolated as a light brown solid; mp 148–150 °C.

$^1\text{H}$  NMR (400 MHz,  $\text{CDCl}_3$ )  $\delta$  7.82–7.77 (m, 2H), 7.58 (dd,  $J = 9.2, 1.0$  Hz, 1H), 7.54–7.51 (m, 1H), 7.44–7.39 (m, 2H), 7.35–7.29 (m, 1H), 7.04–6.99 (m, 3H), 6.72–6.65 (m, 2H), 4.37 (s, 2H), 2.92 (s, 6H), 2.24 (d,  $J = 1.1$  Hz, 3H);  $^{13}\text{C}$  NMR (100 MHz,  $\text{CDCl}_3$ )  $\delta$  149.63, 143.96, 143.65, 134.89, 128.65, 128.45, 128.16, 127.53, 127.30, 124.51, 121.72, 121.23, 118.28, 116.84, 113.21, 40.75, 28.90, 18.52; HRMS (ESI)  $m/z$ :  $[\text{M} + \text{H}]^+$  Calcd for  $\text{C}_{23}\text{H}_{24}\text{N}_3$  342.1965; Found 342.1966.

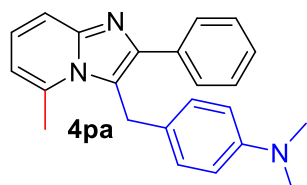

*N,N*-Dimethyl-4-((5-methyl-2-phenylimidazo[1,2-*a*]pyridin-3-yl)methyl)aniline. Compound **4pa** (23 mg, Yield = 34%,  $R_f = 0.25$  (PE/EA = 5:1)) was isolated as a light brown paste.  $^1\text{H}$  NMR (400 MHz,  $\text{CDCl}_3$ )  $\delta$  7.70–7.66 (m, 2H), 7.54 (dt,  $J = 8.9, 1.0$  Hz, 1H), 7.40–7.35 (m, 2H), 7.34–7.30 (m, 1H), 7.03 (dd,  $J = 9.0, 6.8$  Hz, 1H), 6.91–6.87 (m, 2H), 6.72–6.65 (m, 2H), 6.40 (dt,  $J = 6.8, 1.1$  Hz, 1H), 4.56 (s, 2H), 2.92 (s, 6H), 2.64 (s, 3H);  $^{13}\text{C}$  NMR (100 MHz,  $\text{CDCl}_3$ )  $\delta$  149.29, 146.86, 145.60, 136.59, 135.04, 128.91, 128.75, 128.50, 128.31, 127.63, 124.45, 119.89, 115.88, 113.50, 113.29, 40.76, 30.76, 20.18; HRMS (ESI)  $m/z$ :  $[\text{M} + \text{H}]^+$  Calcd for  $\text{C}_{23}\text{H}_{24}\text{N}_3$  342.1965; Found 342.1966.

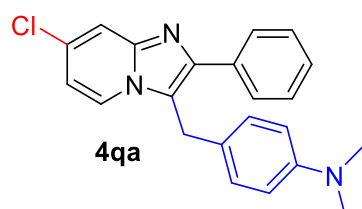

4-((7-Chloro-2-phenylimidazo[1,2-*a*]pyridin-3-yl)methyl)-*N,N*-dimethylaniline. Compound **4qa** (39 mg, Yield = 54%,  $R_f = 0.3$  (PE/EA = 5:1)) was isolated as a light brown paste.  $^1\text{H}$  NMR (400 MHz,  $\text{CDCl}_3$ )  $\delta$  7.81–7.75 (m, 2H), 7.68–7.61 (m, 2H), 7.46–7.41 (m, 2H), 7.38–7.34 (m, 1H), 7.01–6.96 (m, 2H), 6.71–6.64 (m, 3H), 4.38 (s, 2H), 2.92 (s, 6H);  $^{13}\text{C}$  NMR (100 MHz,  $\text{CDCl}_3$ )  $\delta$  149.81, 144.81, 144.61, 134.35, 130.67, 128.79, 128.45, 128.32, 127.99, 124.09, 123.73, 118.97, 116.36, 113.74, 113.26, 40.73, 28.94; HRMS (ESI)  $m/z$ :  $[\text{M} + \text{H}]^+$  Calcd for  $\text{C}_{22}\text{H}_{21}\text{N}_3\text{Cl}$  362.1419; Found 362.1416.

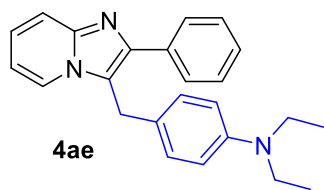

*N,N*-Diethyl-4-((2-phenylimidazo[1,2-*a*]pyridin-3-yl)methyl)aniline. Compound **4ae** (60 mg, Yield = 85%,  $R_f = 0.3$  (PE/EA = 5:1)) was isolated as a light brown paste.  $^1\text{H}$  NMR (400 MHz,  $\text{CDCl}_3$ )  $\delta$  7.85–7.81 (m, 2H), 7.77 (dt,  $J = 6.9, 1.2$  Hz, 1H), 7.67 (dt,  $J = 9.1, 1.1$  Hz, 1H), 7.46–7.39 (m, 2H), 7.37–7.32 (m, 1H), 7.16 (ddd,  $J = 9.0, 6.7, 1.3$  Hz, 1H), 7.01–6.95 (m, 2H), 6.70 (td,  $J = 6.8, 1.2$  Hz, 1H), 6.64–6.58 (m, 2H), 4.38 (s, 2H), 3.32 (q,  $J = 7.1$  Hz, 4H), 1.14 (t,  $J = 7.0$  Hz, 6H);  $^{13}\text{C}$  NMR (100 MHz,  $\text{CDCl}_3$ )  $\delta$  146.87, 144.87, 143.85, 134.80, 128.69, 128.34, 127.68, 124.09, 123.84, 122.91, 118.74, 117.48, 112.34, 112.10, 44.42, 28.92, 12.67, (1C is merged with other peaks); HRMS (ESI)  $m/z$ :  $[\text{M} + \text{H}]^+$  Calcd for  $\text{C}_{24}\text{H}_{26}\text{N}_3$  356.2121; Found 356.2123.

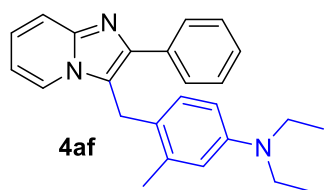

*N,N*-Diethyl-3-methyl-4-((2-phenylimidazo[1,2-*a*]pyridin-3-yl)methyl)aniline. Compound **4af** (66 mg, Yield = 89%,  $R_f = 0.3$  (PE/EA = 5:1)) was isolated as a light brown paste.  $^1\text{H}$  NMR (400 MHz,  $\text{CDCl}_3$ )  $\delta$  7.78–7.74 (m, 2H), 7.71–7.67 (m, 2H), 7.44–7.39 (m, 2H), 7.36–7.31 (m, 1H), 7.18 (ddd,  $J = 9.0, 6.7, 1.2$  Hz, 1H), 6.71 (td,  $J = 6.8, 1.1$  Hz, 1H), 6.62 (d,  $J = 2.8$  Hz, 1H), 6.50 (d,  $J = 8.5$  Hz, 1H), 6.35 (dd,  $J = 8.6, 2.8$  Hz, 1H), 4.27 (s, 2H), 3.35–3.28 (m, 4H), 2.39 (s, 3H), 1.14 (t,  $J = 7.1$  Hz, 6H);  $^{13}\text{C}$  NMR (100 MHz,  $\text{CDCl}_3$ )  $\delta$  146.89, 144.93, 144.12, 137.23, 134.76, 128.70, 128.29, 127.79, 127.66, 124.09, 123.81, 121.05, 118.46, 117.50, 114.07, 112.17, 109.77, 44.34, 26.79, 20.54, 12.75; HRMS (ESI)  $m/z$ :  $[\text{M} + \text{H}]^+$  Calcd for  $\text{C}_{25}\text{H}_{28}\text{N}_3$  370.2278; Found 370.2276.

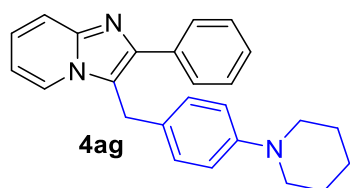

2-Phenyl-3-(4-(piperidin-1-yl)benzyl)imidazo[1,2-*a*]pyridine. Compound **4ag** (38 mg, Yield = 52%,  $R_f = 0.25$  (PE/EA = 5:1)) was isolated as a light brown paste.  $^1\text{H}$  NMR (400 MHz,  $\text{CDCl}_3$ )  $\delta$  7.82–

7.78 (m, 2H), 7.72 (dt,  $J = 6.9, 1.2$  Hz, 1H), 7.68 (dt,  $J = 9.1, 1.2$  Hz, 1H), 7.45–7.40 (m, 2H), 7.37–7.32 (m, 1H), 7.17 (ddd,  $J = 9.1, 6.7, 1.3$  Hz, 1H), 7.04–6.99 (m, 2H), 6.90–6.85 (m, 2H), 6.70 (td,  $J = 6.8, 1.2$  Hz, 1H), 4.41 (s, 2H), 3.15–3.08 (m, 4H), 1.73–1.65 (m, 4H), 1.60–1.53 (m, 2H);  $^{13}\text{C}$  NMR (100 MHz,  $\text{CDCl}_3$ )  $\delta$  151.25, 144.92, 144.00, 134.73, 128.74, 128.45, 128.35, 127.76, 126.99, 124.20, 123.76, 118.42, 117.57, 117.04, 112.18, 50.72, 29.13, 25.98, 24.35; HRMS (ESI)  $m/z$ :  $[\text{M} + \text{H}]^+$  Calcd for  $\text{C}_{25}\text{H}_{26}\text{N}_3$  368.2121; Found 368.2119.

## 9. References

1. H. Su; L. Wang; H. Rao; H. Xu, Iron-Catalyzed Dehydrogenative  $\text{sp}(3)$ - $\text{sp}(2)$  Coupling via Direct Oxidative C-H Activation of Acetonitrile. *Org. Lett.* 2017, **19**, 2226-2229.
2. Y. Yuan; Z. Zhou; L. Zhang; L. S. Li; A. Lei, Electrochemical Oxidative C3 Acyloxylation of Imidazo[1,2-*a*]pyridines with Hydrogen Evolution. *Org. Lett.* 2021, **23**, 5932-5936.
3. Y. Gao; Y. Wang; J. Zhou; H. Mei; J. Han, An electrochemical oxidative homo-coupling reaction of imidazopyridine heterocycles to biheteroaryls. *Green Chem.* 2018, **20**, 583-587.
4. G. Kibriya; A. K. Bagdi; A. Hajra, Visible-Light-Promoted  $\text{C}(\text{sp}(3))$ - $\text{C}(\text{sp}(2))$  Cross-Dehydrogenative Coupling of Tertiary Amine with Imidazopyridine. *J. Org. Chem.* 2018, **83**, 10619-10626.
5. X. Zhu; X. Li; X. Li; J. Lv; K. Sun; X. Song; D. Yang, Decarboxylative C-H alkylation of heteroarenes by copper catalysis. *Org. Chem. Front.* 2021, **8**, 3128-3136.
6. S. Li; X. Li; T. Wang; Q. Yang; Z. Ouyang; J. Chen; H. Zhai; X. Li; B. Cheng, Electrochemical Decarboxylative Coupling of N-Substituted Glycines under Air: Access to C3-Aminomethylated Imidazo[1,2-*a*]pyridines. *Adv. Synth. Catal.* 2022, **364**, 2346-2351.
7. Y. Wang; H. Zheng; J. Xu; C. Zhuang; X. Liu; H. Cao, Access to diverse primary, secondary, and tertiary amines via the merger of controllable cleavage of triazines and site-selective functionalization. *Org. Chem. Front.* 2021, **8**, 4706-4714.
8. S. Mondal; S. Samanta; S. Santra; A. K. Bagdi; A. Hajra, N,N-Dimethylformamide as a Methylenating Reagent: Synthesis of Heterodiarylmethanes via Copper-Catalyzed Coupling between Imidazo[1,2-*a*]pyridines and Indoles/N,N-Dimethylaniline. *Adv. Synth. Catal.* 2016, **358**, 3633-3641.
9. R. Kumar; D. Rawat; S. Adimurthy, Polyethylene Glycol (PEG-400) as Methylene Spacer and Green Solvent for the Synthesis of Heterodiarylmethanes under Metal-Free Conditions. *Eur. J. Org. Chem.* 2020, **2020**, 3499-3507.

## 10. Crystal data and structure refinement of 3aa, 3la and 4ha

The crystal was prepared in ethyl acetate underneath methanol through evaporation, the structure was measured by 'Bruker APEX-II CCD' diffractometer.

### 10.1 X-ray structure of 3aa

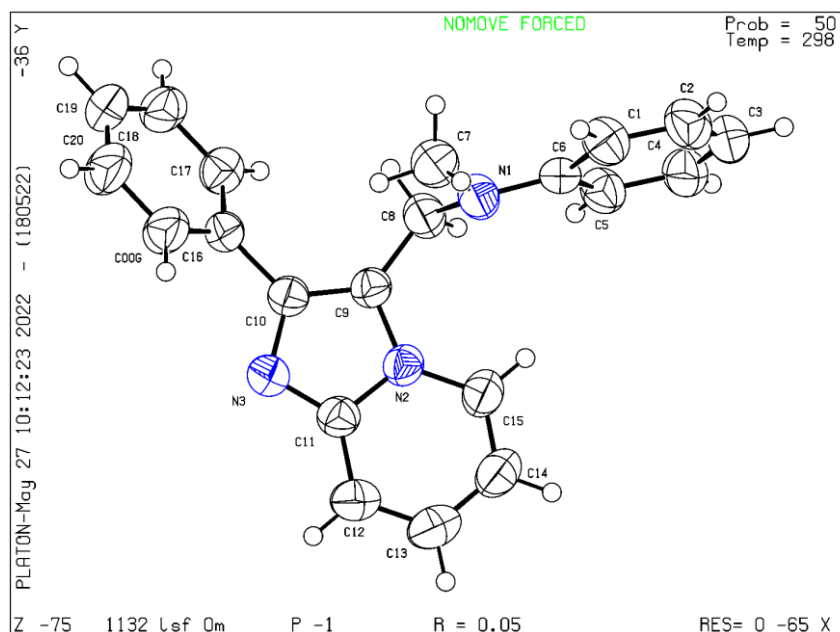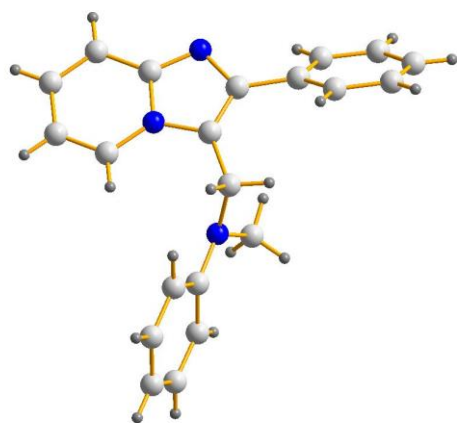

CCDC 2175986

**Table S9 Crystal data and structure refinement for 3aa**

|                     |                                                |
|---------------------|------------------------------------------------|
| Identification code | 1132_LSF_0m                                    |
| Empirical formula   | C <sub>21</sub> H <sub>19</sub> N <sub>3</sub> |
| Formula weight      | 313.39                                         |
| Temperature/K       | 298.0                                          |
| Crystal system      | triclinic                                      |
| Space group         | P-1                                            |



|                                             |                                                               |
|---------------------------------------------|---------------------------------------------------------------|
| a/Å                                         | 8.365(4)                                                      |
| b/Å                                         | 10.655(5)                                                     |
| c/Å                                         | 10.809(5)                                                     |
| $\alpha$ /°                                 | 115.055(14)                                                   |
| $\beta$ /°                                  | 99.780(14)                                                    |
| $\gamma$ /°                                 | 98.016(15)                                                    |
| Volume/Å <sup>3</sup>                       | 835.6(7)                                                      |
| Z                                           | 2                                                             |
| $\rho_{\text{calc}}/\text{cm}^3$            | 1.246                                                         |
| $\mu/\text{mm}^{-1}$                        | 0.075                                                         |
| F(000)                                      | 332.0                                                         |
| Crystal size/mm <sup>3</sup>                | 0.6 × 0.6 × 0.6                                               |
| Radiation                                   | MoK $\alpha$ ( $\lambda$ = 0.71073)                           |
| 2 $\theta$ range for data collection/°      | 4.302 to 54.966                                               |
| Index ranges                                | -9 ≤ h ≤ 10, -13 ≤ k ≤ 13, -14 ≤ l ≤ 14                       |
| Reflections collected                       | 13642                                                         |
| Independent reflections                     | 3805 [R <sub>int</sub> = 0.0552, R <sub>sigma</sub> = 0.0503] |
| Data/restraints/parameters                  | 3805/0/218                                                    |
| Goodness-of-fit on F <sup>2</sup>           | 1.033                                                         |
| Final R indexes [I ≥ 2 $\sigma$ (I)]        | R <sub>1</sub> = 0.0470, wR <sub>2</sub> = 0.1198             |
| Final R indexes [all data]                  | R <sub>1</sub> = 0.0676, wR <sub>2</sub> = 0.1352             |
| Largest diff. peak/hole / e Å <sup>-3</sup> | 0.15/-0.14                                                    |

## 10.2 X-ray structure of 3la

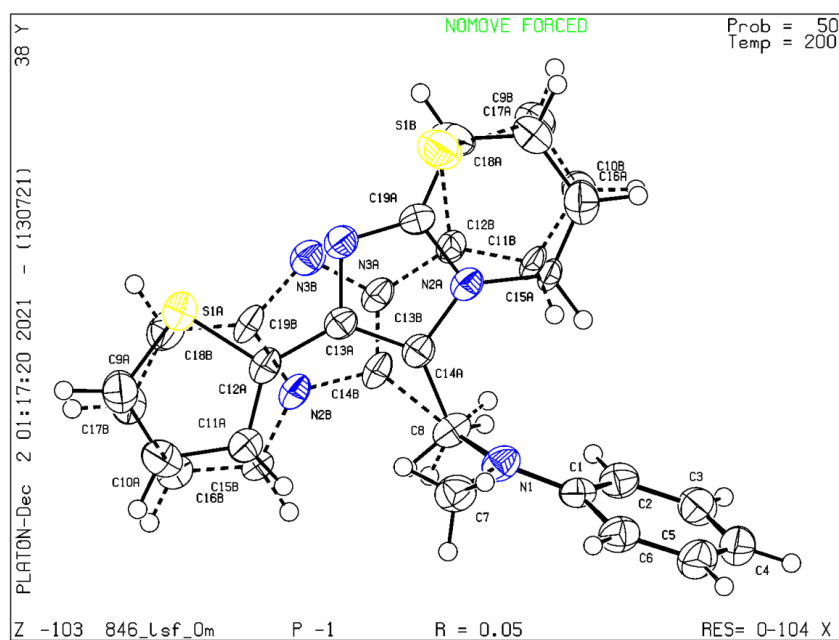

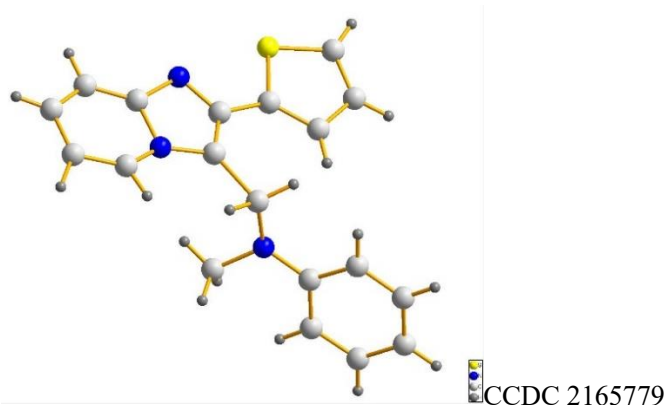

**Table S10 Crystal data and structure refinement for 3la**

|                                             |                                                               |
|---------------------------------------------|---------------------------------------------------------------|
| Identification code                         | 846_LSF_0m                                                    |
| Empirical formula                           | C <sub>19</sub> H <sub>17</sub> N <sub>3</sub> S              |
| Formula weight                              | 319.41                                                        |
| Temperature/K                               | 200.0                                                         |
| Crystal system                              | triclinic                                                     |
| Space group                                 | P-1                                                           |
| a/Å                                         | 8.3612(2)                                                     |
| b/Å                                         | 9.7442(2)                                                     |
| c/Å                                         | 10.6475(2)                                                    |
| α/°                                         | 65.8180(10)                                                   |
| β/°                                         | 86.3210(10)                                                   |
| γ/°                                         | 79.4170(10)                                                   |
| Volume/Å <sup>3</sup>                       | 777.84(3)                                                     |
| Z                                           | 2                                                             |
| ρ <sub>calc</sub> /cm <sup>3</sup>          | 1.364                                                         |
| μ/mm <sup>-1</sup>                          | 1.853                                                         |
| F(000)                                      | 336.0                                                         |
| Crystal size/mm <sup>3</sup>                | 0.2 × 0.1 × 0.08                                              |
| Radiation                                   | CuKα (λ = 1.54178)                                            |
| 2θ range for data collection/°              | 9.104 to 136.372                                              |
| Index ranges                                | -10 ≤ h ≤ 9, -11 ≤ k ≤ 11, -12 ≤ l ≤ 12                       |
| Reflections collected                       | 10004                                                         |
| Independent reflections                     | 2825 [R <sub>int</sub> = 0.0474, R <sub>sigma</sub> = 0.0410] |
| Data/restraints/parameters                  | 2825/872/324                                                  |
| Goodness-of-fit on F <sup>2</sup>           | 1.099                                                         |
| Final R indexes [I ≥ 2σ (I)]                | R <sub>1</sub> = 0.0466, wR <sub>2</sub> = 0.1197             |
| Final R indexes [all data]                  | R <sub>1</sub> = 0.0503, wR <sub>2</sub> = 0.1229             |
| Largest diff. peak/hole / e Å <sup>-3</sup> | 0.29/-0.28                                                    |

### 10.3 X-ray structure of 4ha

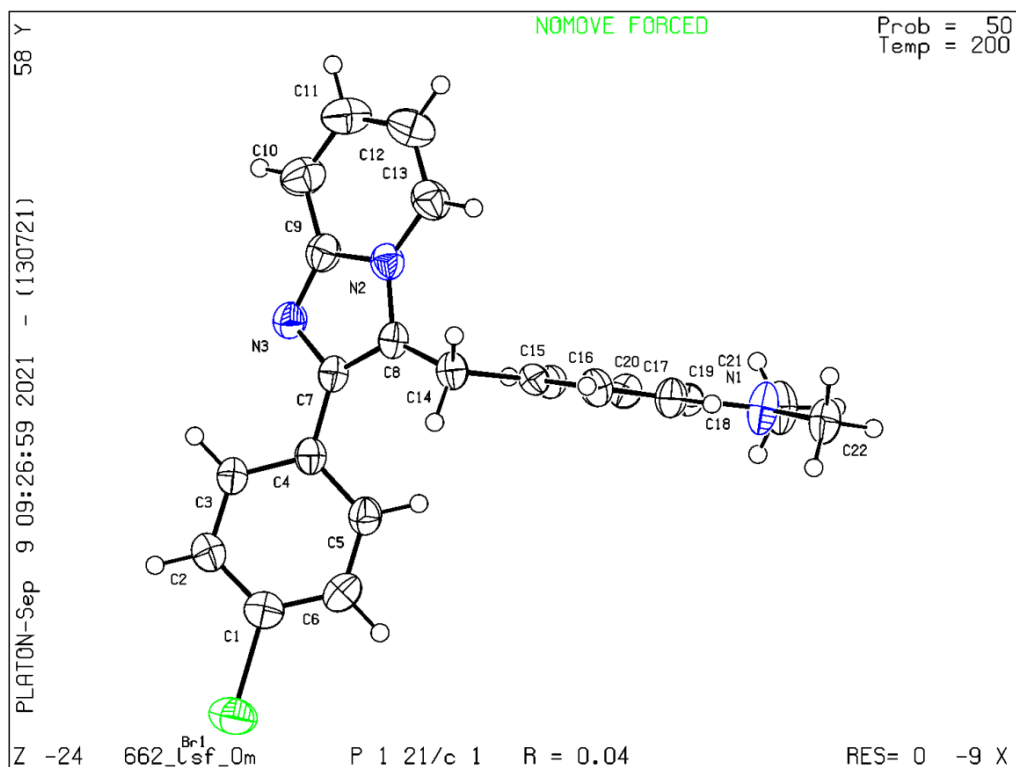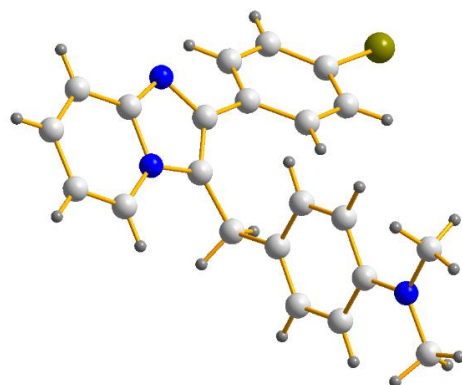

CCDC 2165780

**Table S11 Crystal data and structure refinement for 4ha**

|                     |                                                  |
|---------------------|--------------------------------------------------|
| Identification code | 662_LSF_0m                                       |
| Empirical formula   | C <sub>22</sub> H <sub>20</sub> BrN <sub>3</sub> |
| Formula weight      | 406.32                                           |
| Temperature/K       | 200.0                                            |
| Crystal system      | monoclinic                                       |
| Space group         | P2 <sub>1</sub> /c                               |
| a/Å                 | 6.3317(2)                                        |
| b/Å                 | 10.0072(3)                                       |
| c/Å                 | 29.5714(8)                                       |
| α/°                 | 90                                               |

|                                               |                                                               |
|-----------------------------------------------|---------------------------------------------------------------|
| $\beta/^\circ$                                | 92.360(2)                                                     |
| $\gamma/^\circ$                               | 90                                                            |
| Volume/ $\text{\AA}^3$                        | 1872.13(10)                                                   |
| Z                                             | 4                                                             |
| $\rho_{\text{calc}}/\text{g/cm}^3$            | 1.442                                                         |
| $\mu/\text{mm}^{-1}$                          | 3.057                                                         |
| F(000)                                        | 832.0                                                         |
| Crystal size/ $\text{mm}^3$                   | $0.4 \times 0.03 \times 0.01$                                 |
| Radiation                                     | CuK $\alpha$ ( $\lambda = 1.54178$ )                          |
| $2\theta$ range for data collection/ $^\circ$ | 5.982 to 136.386                                              |
| Index ranges                                  | $-7 \leq h \leq 6, -12 \leq k \leq 12, -35 \leq l \leq 34$    |
| Reflections collected                         | 14919                                                         |
| Independent reflections                       | 3421 [ $R_{\text{int}} = 0.0655, R_{\text{sigma}} = 0.0561$ ] |
| Data/restraints/parameters                    | 3421/0/237                                                    |
| Goodness-of-fit on $F^2$                      | 1.044                                                         |
| Final R indexes [ $I \geq 2\sigma(I)$ ]       | $R_1 = 0.0417, wR_2 = 0.1057$                                 |
| Final R indexes [all data]                    | $R_1 = 0.0543, wR_2 = 0.1127$                                 |
| Largest diff. peak/hole / $e \text{\AA}^{-3}$ | 0.49/-0.53                                                    |

## 11. NMR spectra of C3 methylated imidazo[1,2-a]pyridines

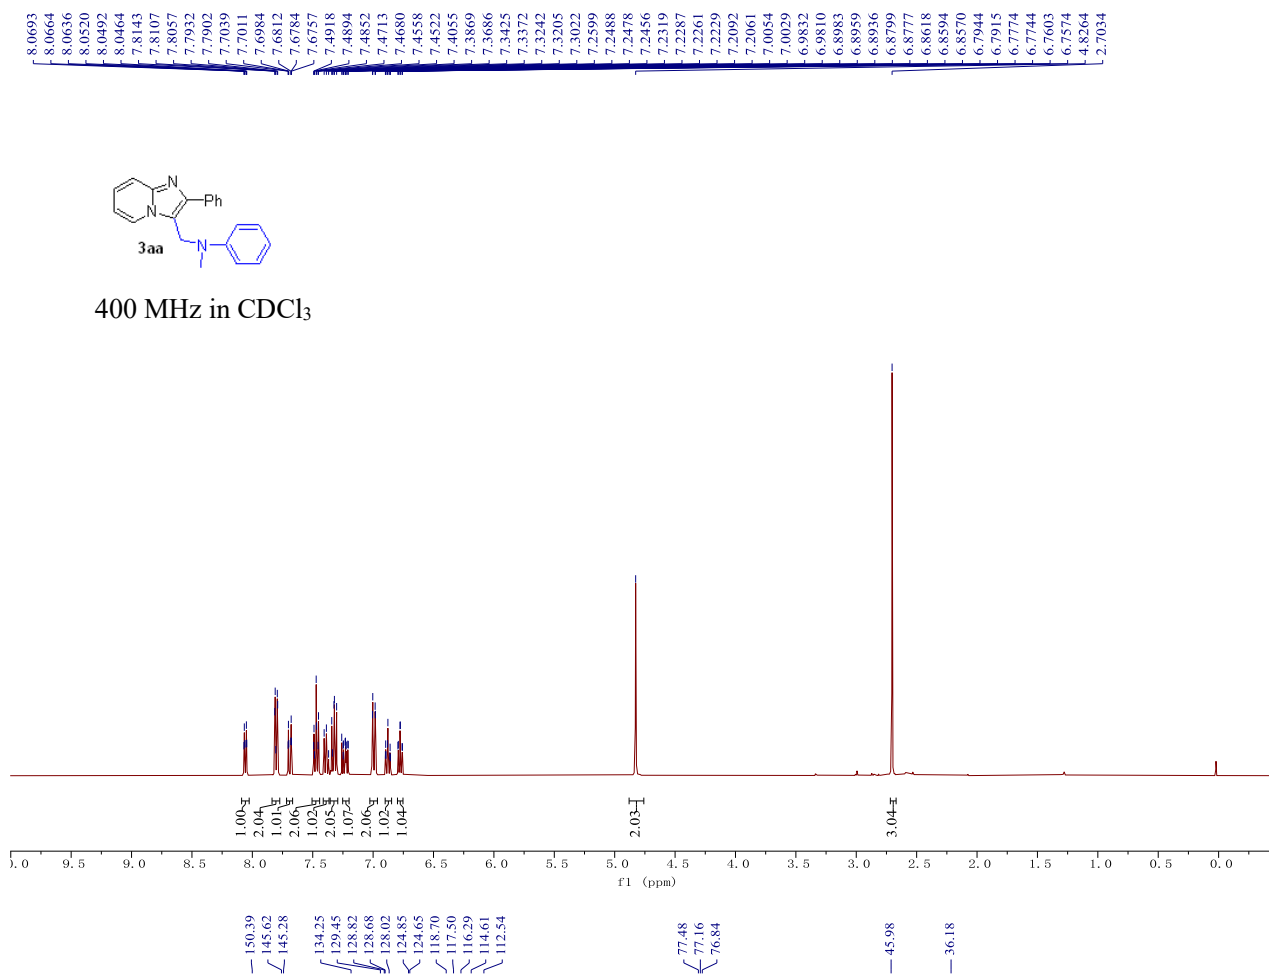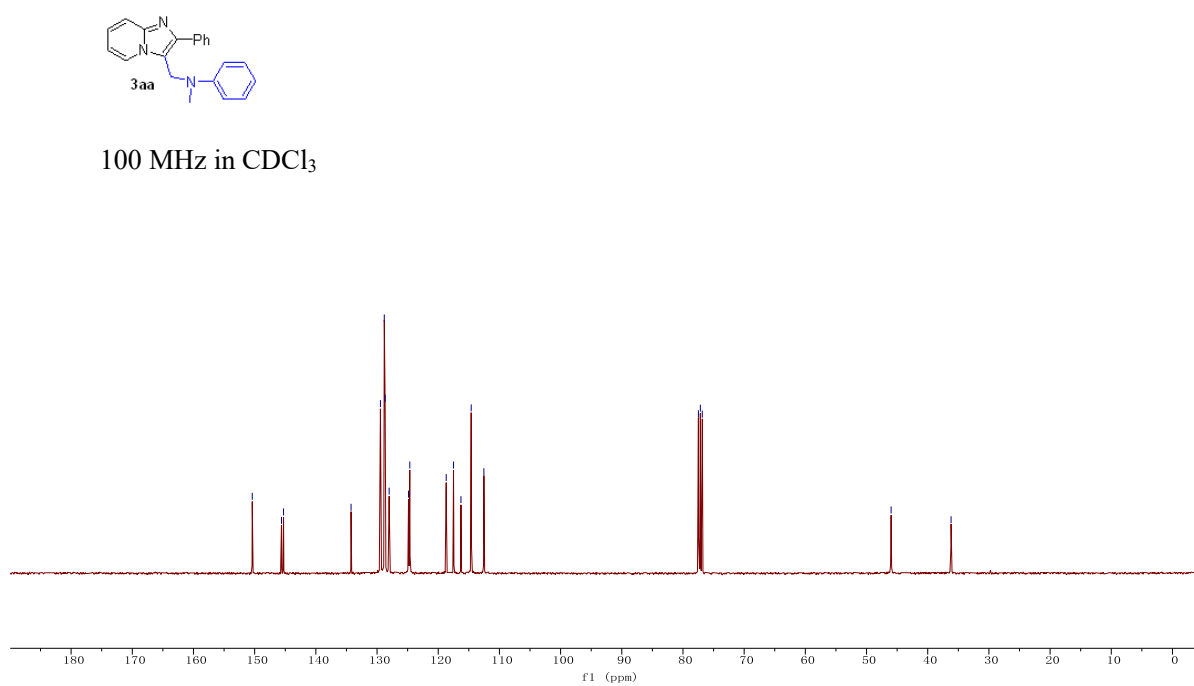

7.9932  
7.9880  
7.9758  
7.9706  
7.9634  
7.8651  
7.8622  
7.8592  
7.8479  
7.8450  
7.8420  
7.7675  
7.7656  
7.7619  
7.7569  
7.7486  
7.7470  
7.7445  
7.7415  
7.7040  
7.7012  
7.6983  
7.6813  
7.6785  
7.6757  
7.4906  
7.4886  
7.4858  
7.4815  
7.4729  
7.4696  
7.4679  
7.4642  
7.4526  
7.4491  
7.4474  
7.4131  
7.4096  
7.4062  
7.3968  
7.3922  
7.3908  
7.3728  
7.2643  
7.2615  
7.2600  
7.2595  
7.2475  
7.2443  
7.2416  
7.2384  
7.2247  
7.2215  
6.9092  
6.9040  
6.8917  
6.8865  
6.8113  
6.8084  
6.7943  
6.7913  
6.7773  
6.7742  
4.9495  
4.3703  
4.3524  
4.3346  
4.3168  
2.7576  
1.3964  
1.3785  
1.3607

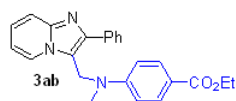

400 MHz in CDCl<sub>3</sub>

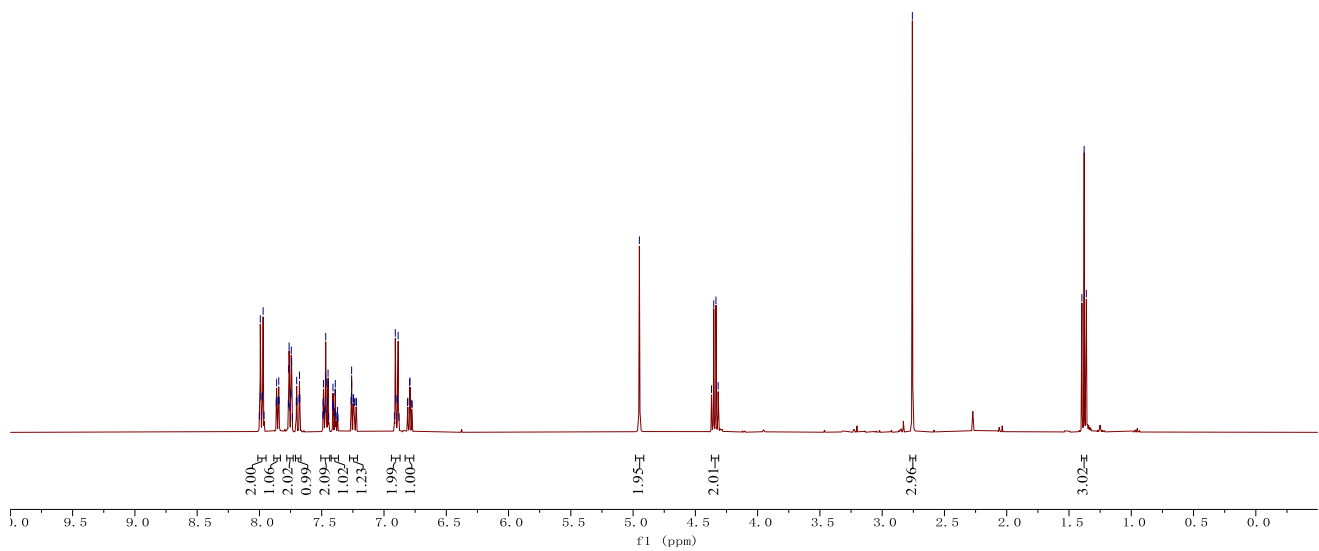

166.86  
153.07  
146.13  
145.48  
134.01  
131.59  
128.85  
128.82  
128.30  
125.14  
124.16  
119.35  
117.80  
115.47  
113.03  
112.10  
77.48  
77.16  
76.84  
60.50  
44.70  
35.12  
14.58

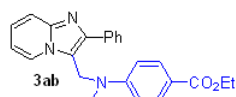

100 MHz in CDCl<sub>3</sub>

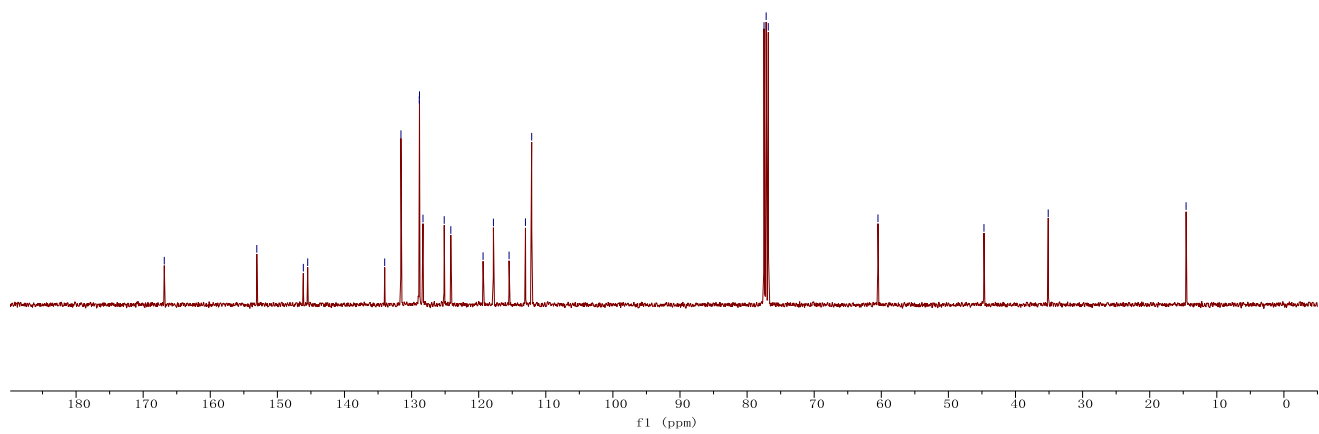

7.9699  
7.9669  
7.9638  
7.9527  
7.9496  
7.9466  
7.7723  
7.7685  
7.7634  
7.7549  
7.7511  
7.7481  
7.7428  
7.6899  
7.6870  
7.6843  
7.6672  
7.6643  
7.6616  
7.4844  
7.4825  
7.4798  
7.4756  
7.4666  
7.4620  
7.4582  
7.4464  
7.4430  
7.4412  
7.4376  
7.4045  
7.4010  
7.3976  
7.3881  
7.3826  
7.3762  
7.3668  
7.3612  
7.3498  
7.3441  
7.3356  
7.2600  
7.2501  
7.2469  
7.2332  
7.2299  
7.2273  
7.2242  
7.2105  
7.2072  
6.8229  
6.8144  
6.8084  
6.8049  
6.7972  
6.7913  
6.7878  
6.7829  
6.7738  
6.7708  
4.7763  
2.6723

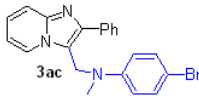

400 MHz in CDCl<sub>3</sub>

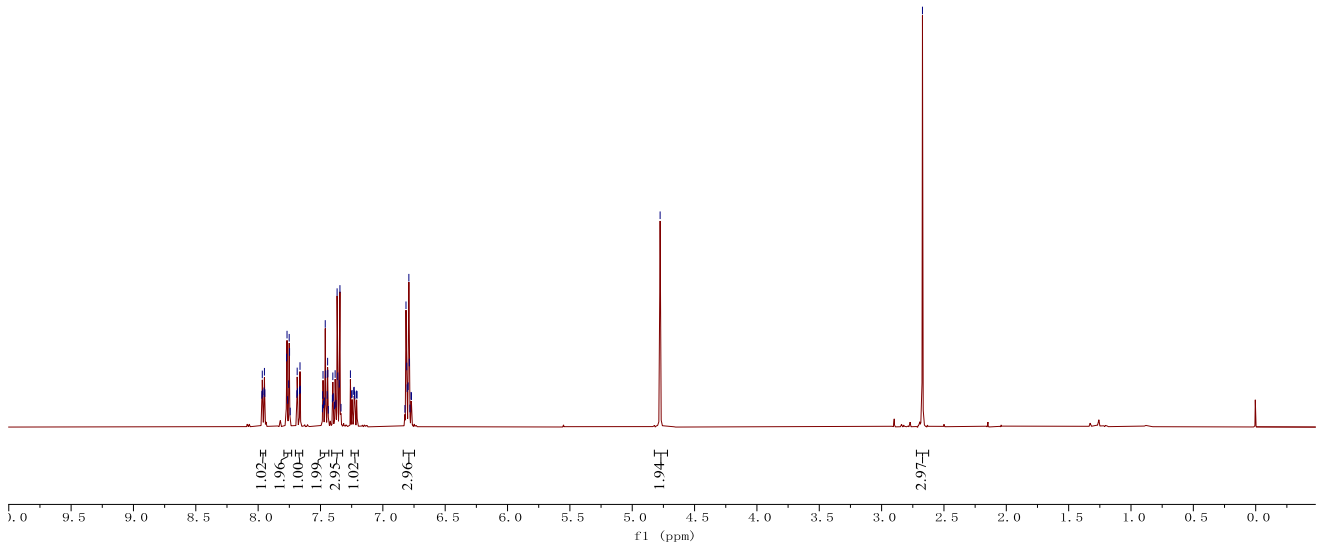

149.21  
145.83  
145.35  
134.16  
132.12  
128.80  
128.74  
128.14  
124.94  
124.38  
117.65  
115.97  
115.85  
112.71  
110.63  
77.48  
77.16  
76.84  
45.77  
36.18

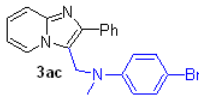

100 MHz in CDCl<sub>3</sub>

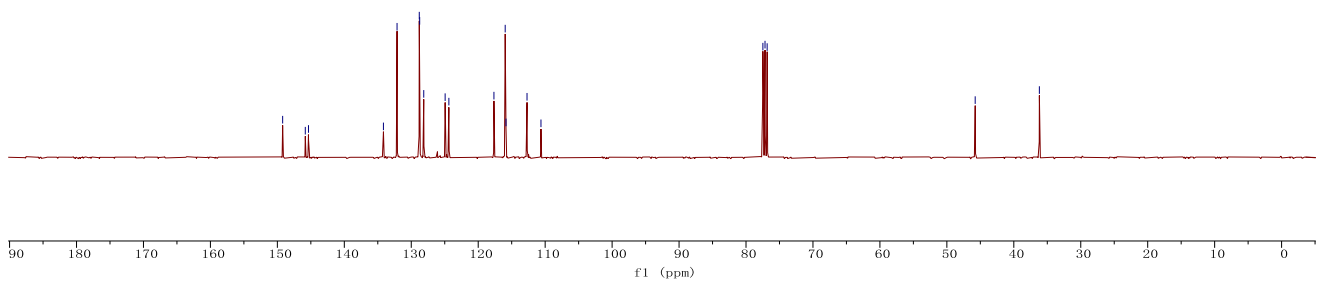

8.1235  
8.1207  
8.1176  
8.1064  
8.1033  
8.1004  
7.8379  
7.8137  
7.8099  
7.7962  
7.7926  
7.7899  
7.6963  
7.6934  
7.6905  
7.6736  
7.6708  
7.6679  
7.4876  
7.4851  
7.4712  
7.4671  
7.4634  
7.4516  
7.4479  
7.4039  
7.4005  
7.3970  
7.3872  
7.3821  
7.3764  
7.3669  
7.3636  
7.2600  
7.2426  
7.2394  
7.2257  
7.2225  
7.2198  
7.2166  
7.2031  
7.1998  
7.1445  
7.1371  
7.1353  
7.1306  
7.1211  
7.1184  
7.1153  
7.1132  
7.1079  
7.1061  
6.9416  
6.9341  
6.9268  
6.9212  
6.9101  
6.9052  
6.8976  
6.7912  
6.7882  
6.7744  
6.7712  
6.7572  
6.7541  
4.7706  
2.6769  
2.3070

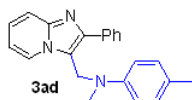

**3ad**  
400 MHz in CDCl<sub>3</sub>

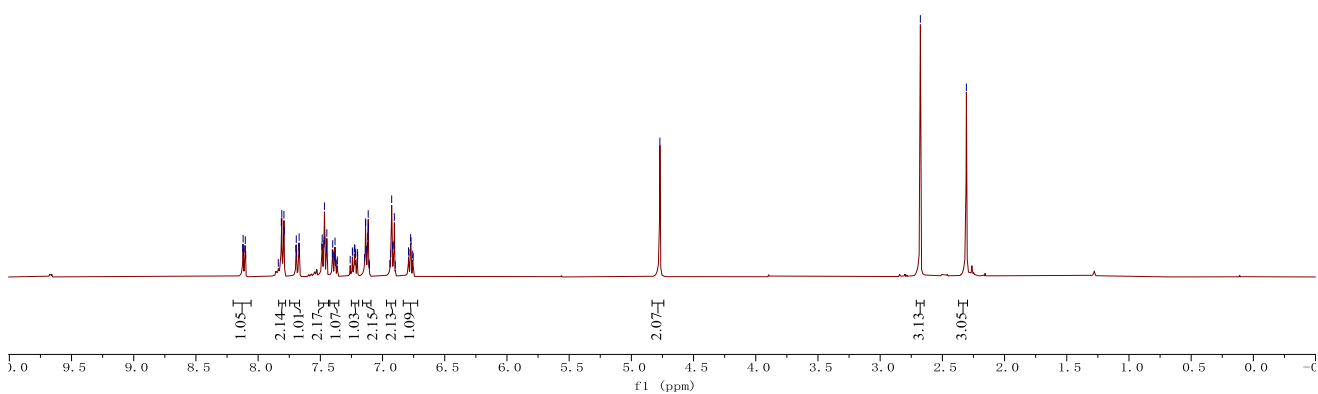

148.46  
145.52  
145.26  
134.34  
129.94  
128.97  
128.87  
128.66  
128.37  
127.98  
124.80  
117.47  
16.52  
15.29  
112.43

77.48  
77.16  
76.84

46.66

36.91

20.42

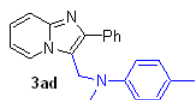

**3ad**  
100 MHz in CDCl<sub>3</sub>

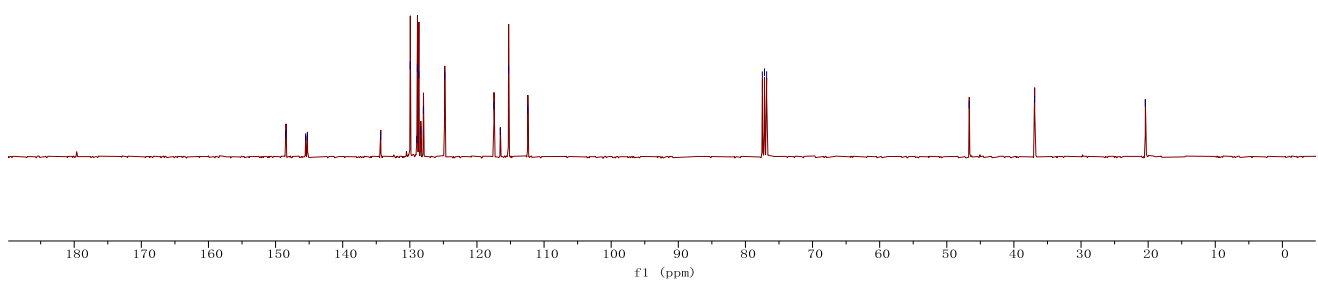



8.0918  
8.0888  
8.0861  
8.0745  
8.0716  
8.0689  
7.8203  
7.8164  
7.8112  
7.8026  
7.7987  
7.7959  
7.7038  
7.7009  
7.6979  
7.6811  
7.6781  
7.6752  
7.4975  
7.4948  
7.4904  
7.4771  
7.4729  
7.4613  
7.4576  
7.4136  
7.4100  
7.4065  
7.3918  
7.2600  
7.2547  
7.2517  
7.2380  
7.2351  
7.2321  
7.2291  
7.2161  
7.2128  
7.1978  
7.1948  
6.8326  
6.8260  
6.8086  
6.8051  
6.7881  
6.7854  
6.7712  
6.7683  
6.7183  
6.6995  
4.8326  
2.3457

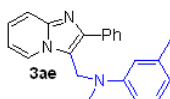

400 MHz in CDCl<sub>3</sub>

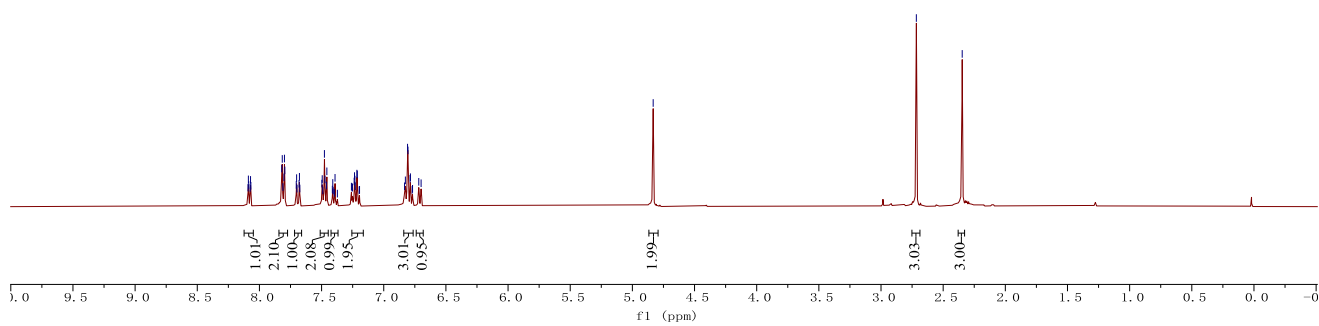

150.51  
145.64  
145.32  
139.22  
134.55  
129.31  
128.88  
128.70  
128.03  
124.83  
124.75  
119.64  
117.55  
116.42  
115.42  
112.52  
111.84  
77.48  
77.16  
76.84  
46.10  
36.42  
21.96

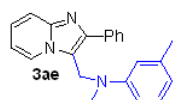

100 MHz in CDCl<sub>3</sub>

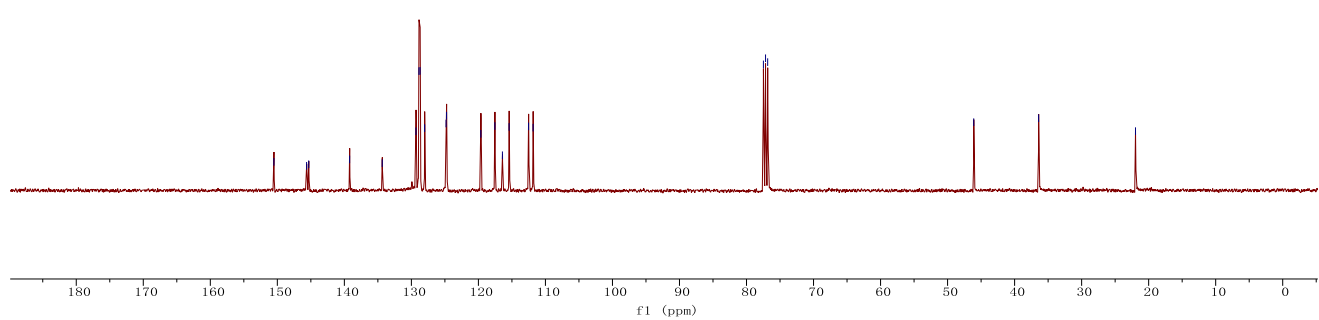

8.2474  
8.2444  
8.2413  
8.2302  
8.2272  
8.2241  
7.8061  
7.8024  
7.7974  
7.7890  
7.7879  
7.7851  
7.7821  
7.6587  
7.6558  
7.6329  
7.6360  
7.6332  
7.6303  
7.5113  
7.5093  
7.5066  
7.5024  
7.4929  
7.4885  
7.4850  
7.4731  
7.4694  
7.4644  
7.4218  
7.4183  
7.4149  
7.4050  
7.3999  
7.3944  
7.3847  
7.3813  
7.2600  
7.2194  
7.2161  
7.2025  
7.1991  
7.1965  
7.1933  
7.1844  
7.1800  
7.1765  
7.1661  
7.1618  
7.1468  
7.1420  
7.1286  
7.1243  
7.1104  
7.1063  
7.0905  
7.0864  
7.0382  
7.0341  
7.0201  
7.0160  
7.0022  
6.9980  
6.7841  
6.7810  
6.7670  
6.7639  
6.7499  
6.7468  
4.5954  
2.5187  
2.2644

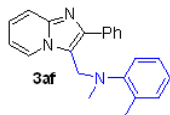

400 MHz in CDCl<sub>3</sub>

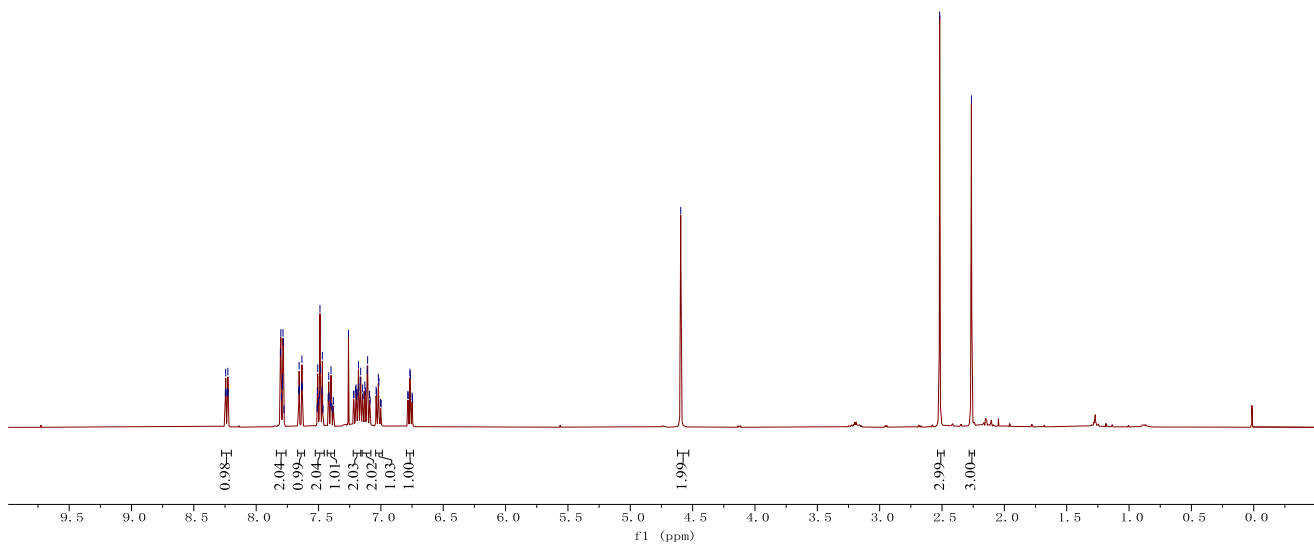

151.24  
145.33  
145.14  
134.72  
133.73  
131.31  
129.04  
128.56  
127.84  
126.81  
125.24  
124.58  
124.18  
120.76  
117.39  
117.05  
111.78  
77.48  
77.16  
76.84  
49.23  
42.50  
17.96

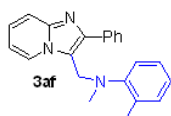

100 MHz in CDCl<sub>3</sub>

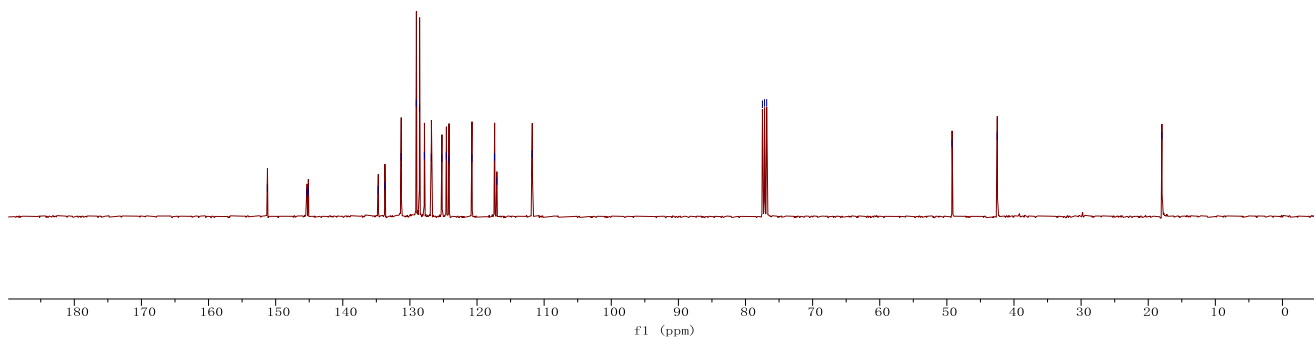

7.9380  
7.9348  
7.9317  
7.9208  
7.9177  
7.9147  
7.7151  
7.7111  
7.7060  
7.6975  
7.6937  
7.6909  
7.6636  
7.6606  
7.6577  
7.6409  
7.6379  
7.6351  
7.4624  
7.4592  
7.4549  
7.4462  
7.4415  
7.4374  
7.4261  
7.4221  
7.3903  
7.3868  
7.3834  
7.3742  
7.3686  
7.3502  
7.2601  
7.2238  
7.2207  
7.2072  
7.2037  
7.2012  
7.1980  
7.1843  
7.1812  
6.8277  
6.7787  
6.7755  
6.7615  
6.7584  
6.7447  
6.7415  
4.6192  
2.7067  
2.2550  
2.1738

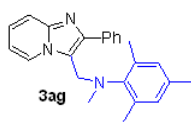

400 MHz in CDCl<sub>3</sub>

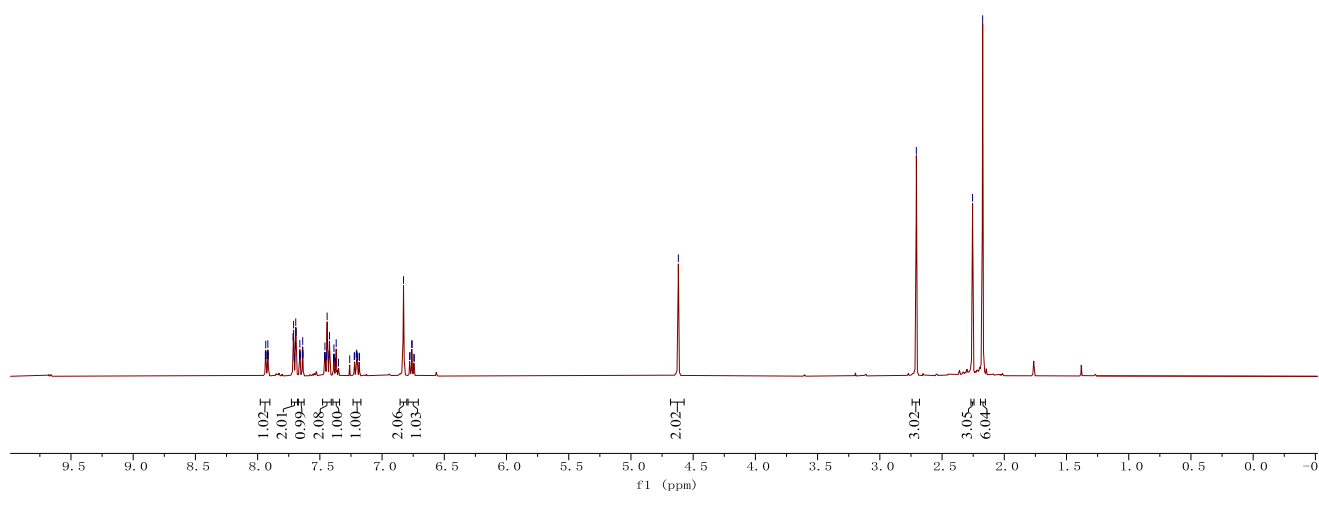

145.61  
144.97  
144.92  
136.73  
135.10  
134.73  
130.11  
128.93  
128.46  
127.74  
124.79  
124.53  
118.64  
117.35  
111.83  
77.48  
77.16  
76.84  
48.56  
40.48  
20.75  
19.25

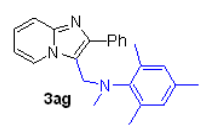

100 MHz in CDCl<sub>3</sub>

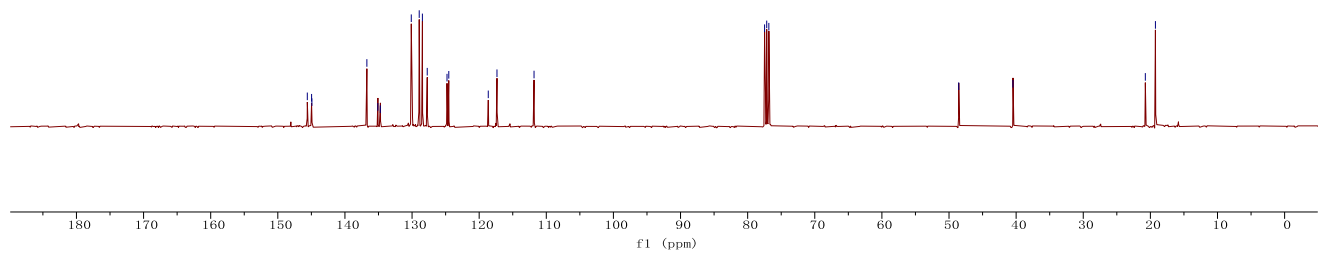

8.1847  
8.1817  
8.1787  
8.1674  
8.1644  
8.1614  
7.7922  
7.7885  
7.7835  
7.7748  
7.7710  
7.7681  
7.6783  
7.6753  
7.6725  
7.6554  
7.6526  
7.6498  
7.4761  
7.4740  
7.4714  
7.4671  
7.4580  
7.4535  
7.4497  
7.4380  
7.4344  
7.4326  
7.3907  
7.3872  
7.3838  
7.3741  
7.3688  
7.3632  
7.3504  
7.2601  
7.2313  
7.2281  
7.2144  
7.2112  
7.2086  
7.2054  
7.1918  
7.1886  
6.9595  
6.9536  
6.9429  
6.9367  
6.9277  
6.9211  
6.8786  
6.8697  
6.8636  
6.8528  
6.8470  
6.7921  
6.7891  
6.7750  
6.7720  
6.7579  
6.7549  
4.6684  
3.7673  
3.6401

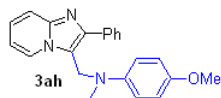

400 MHz in CDCl<sub>3</sub>

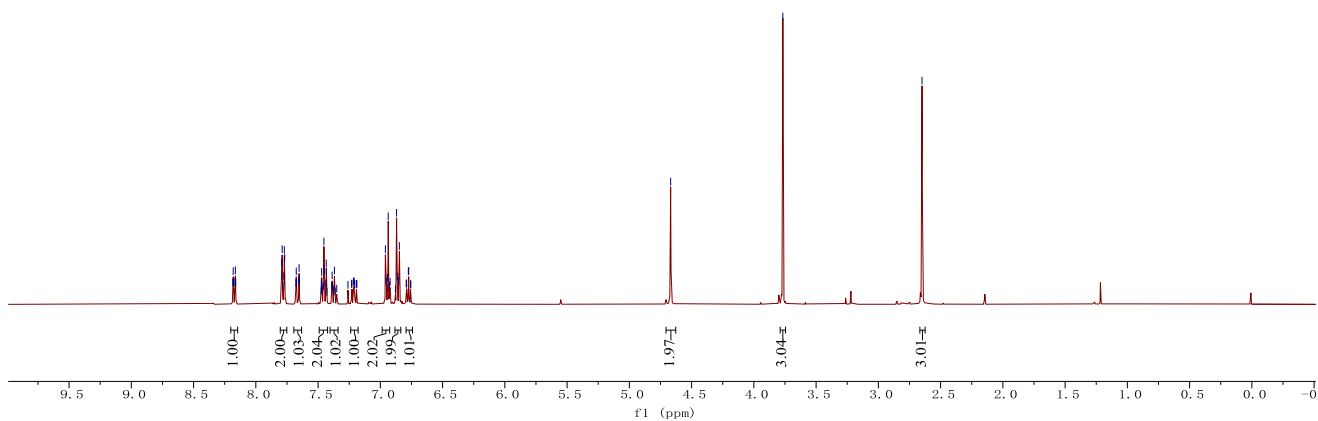

153.60  
145.43  
145.18  
145.08  
134.40  
128.86  
128.59  
127.90  
124.89  
124.72  
117.83  
117.41  
116.62  
114.70  
112.27  
77.48  
77.16  
76.84  
55.68  
48.03  
38.42

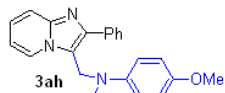

100 MHz in CDCl<sub>3</sub>

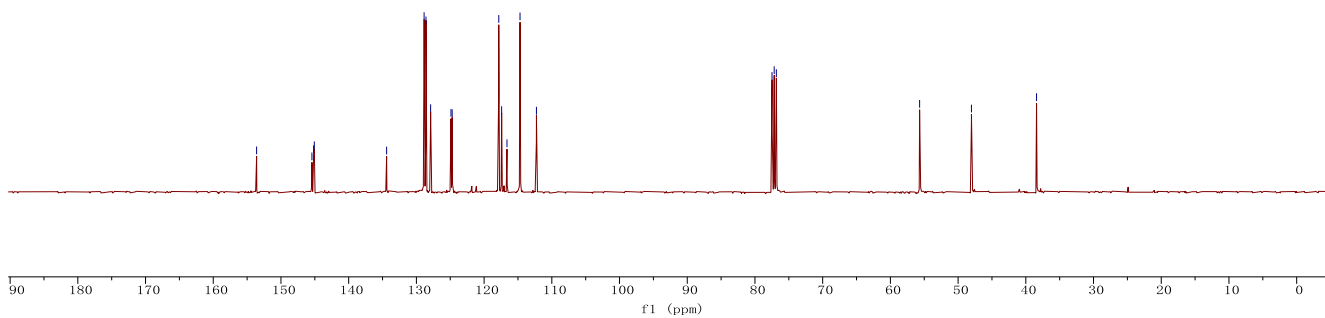

8.0453  
8.0422  
8.0394  
8.0280  
8.0250  
8.0219  
7.7675  
7.7639  
7.7466  
7.7435  
7.7056  
7.7026  
7.6998  
7.6829  
7.6799  
7.6771  
7.4919  
7.4757  
7.4740  
7.4705  
7.4551  
7.4534  
7.4152  
7.4118  
7.3943  
7.3928  
7.3749  
7.2883  
7.2701  
7.2664  
7.2601  
7.2481  
7.2324  
7.2155  
6.9442  
6.9416  
6.9219  
6.9194  
6.8478  
6.8453  
6.8427  
6.8295  
6.8271  
6.8245  
6.8088  
6.8061  
6.8023  
6.7993  
6.7852  
6.7822  
6.7683  
6.7652  
4.8479  
4.8479  
3.0162  
3.0013  
2.9962  
2.9773  
1.1998  
1.1805  
1.0341  
1.0309  
1.0138  
0.9967  
0.9455  
0.9274  
0.6993  
0.6817  
0.6634

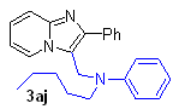

400 MHz in CDCl<sub>3</sub>

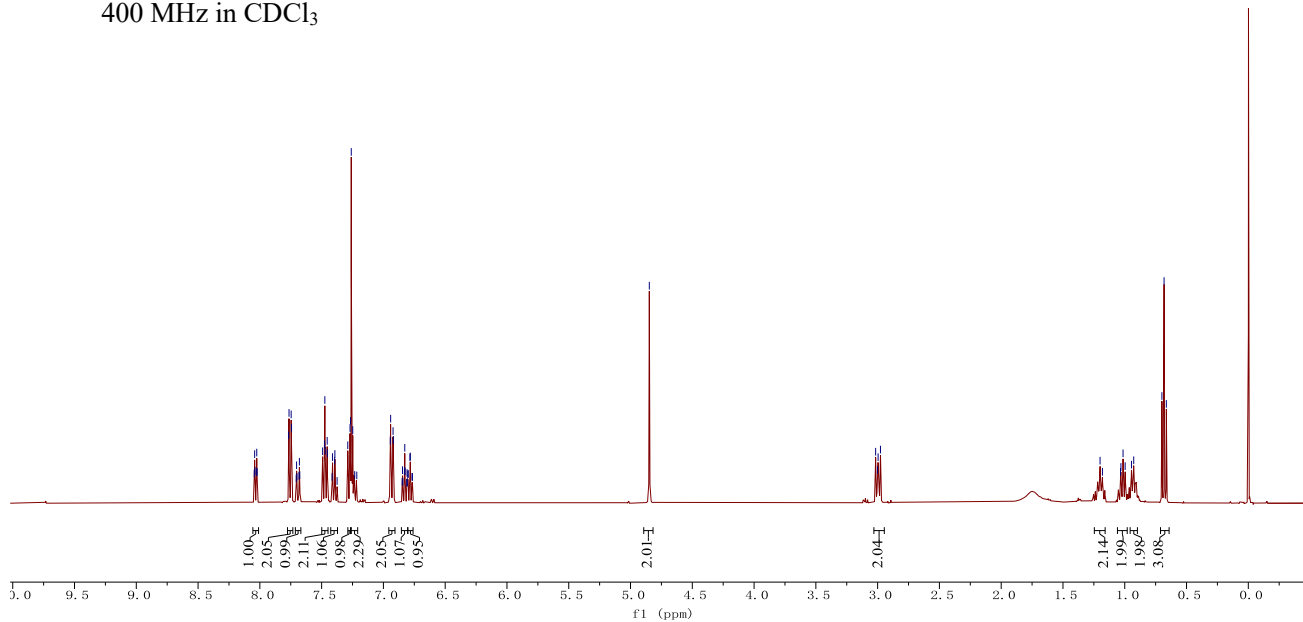

149.31  
145.69  
145.25  
134.45  
129.47  
128.95  
128.69  
128.06  
124.96  
124.83  
118.59  
117.53  
116.65  
115.50  
112.41  
77.48  
77.16  
76.84  
49.16  
43.75  
29.16  
25.56  
22.34  
13.98

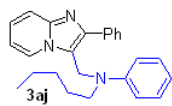

100 MHz in CDCl<sub>3</sub>

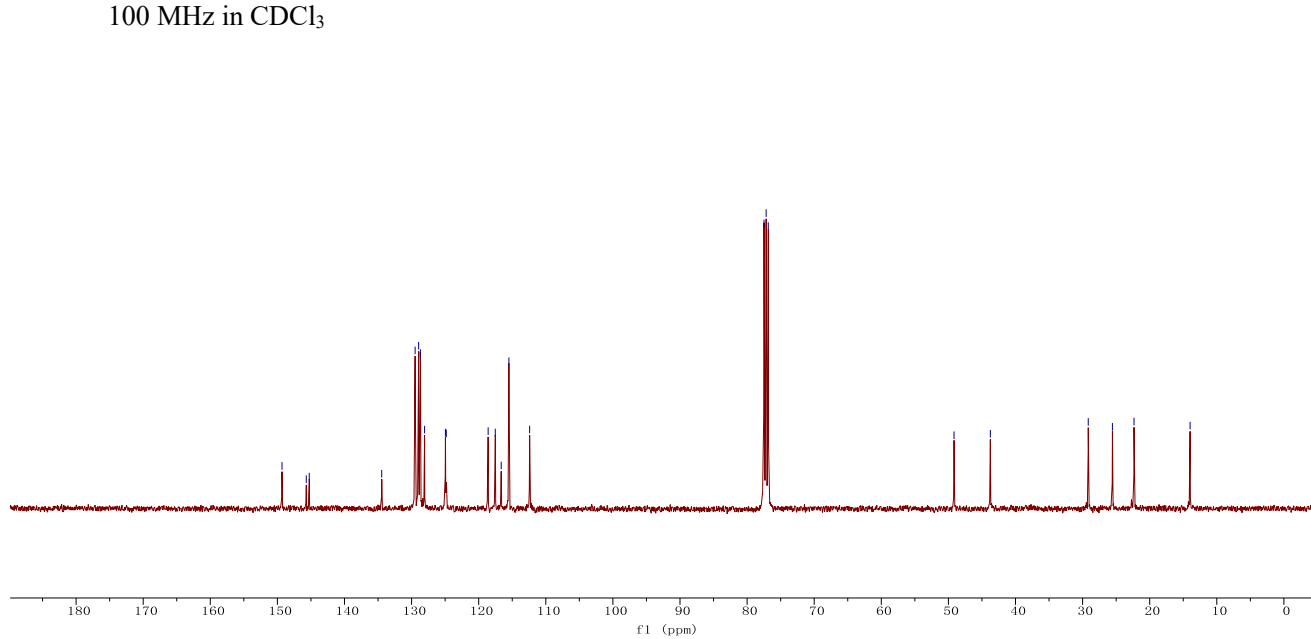

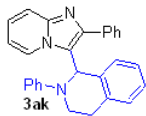

400 MHz in CDCl<sub>3</sub>

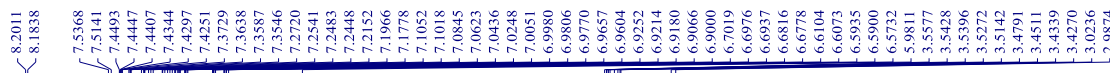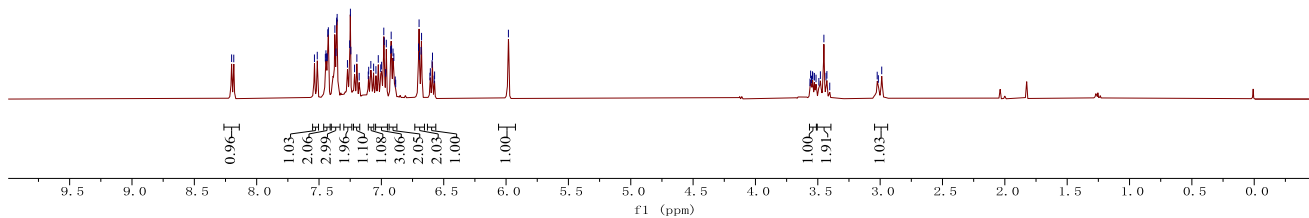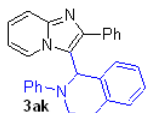

100 MHz in CDCl<sub>3</sub>

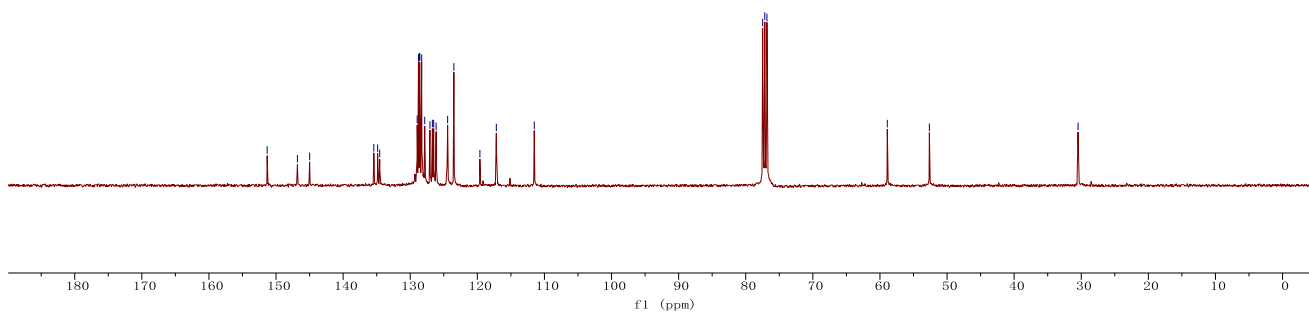

8.4365  
8.4334  
8.4304  
8.4192  
8.4162  
8.4132  
8.4131  
7.8131  
7.8094  
7.7948  
7.7920  
7.7889  
7.6305  
7.6277  
7.6248  
7.6078  
7.6050  
7.6021  
7.4644  
7.4621  
7.4597  
7.4555  
7.4458  
7.4416  
7.4381  
7.4262  
7.4223  
7.3677  
7.3644  
7.3610  
7.3510  
7.3458  
7.3274  
7.2015  
7.1981  
7.1847  
7.1814  
7.1787  
7.1755  
7.1620  
7.1587  
6.7991  
6.7960  
6.7821  
6.7791  
6.7650  
6.7619  
3.9299  
2.4007  
2.3829  
2.3797  
2.3644  
2.1569  
2.1569  
1.4689  
1.4661  
1.4634  
1.4600  
1.4519  
1.4469  
1.4403  
1.4330  
1.4311  
1.4282  
1.4234  
1.2834  
1.2701  
1.2644  
1.2511  
1.2454  
1.2272  
0.8446  
0.8262  
0.8078

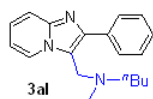

400 MHz in CDCl<sub>3</sub>

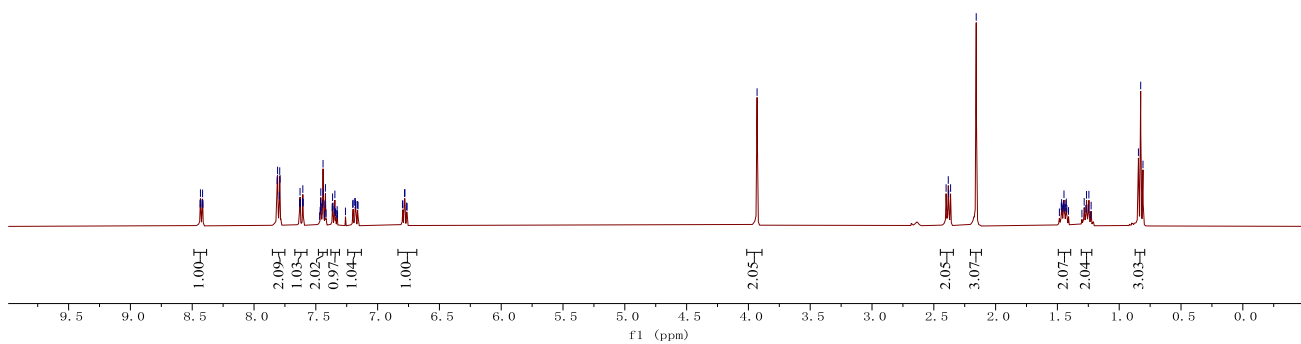

145.00  
144.80  
134.74  
128.97  
128.45  
127.66  
125.61  
124.48  
117.53  
117.17  
111.72  
77.48  
77.16  
76.84  
56.95  
51.70  
41.60  
29.45  
20.51  
14.01

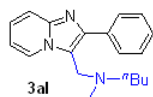

100 MHz in CDCl<sub>3</sub>

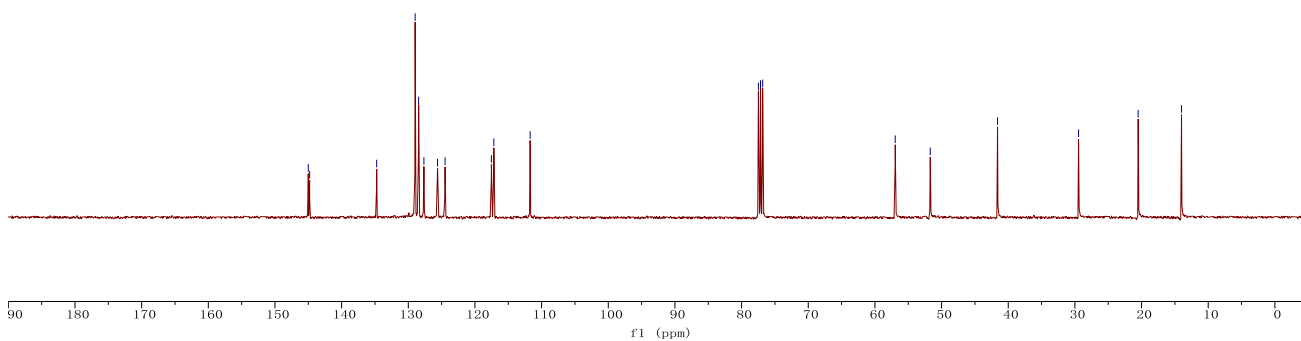

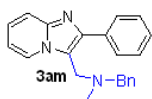

400 MHz in CDCl<sub>3</sub>

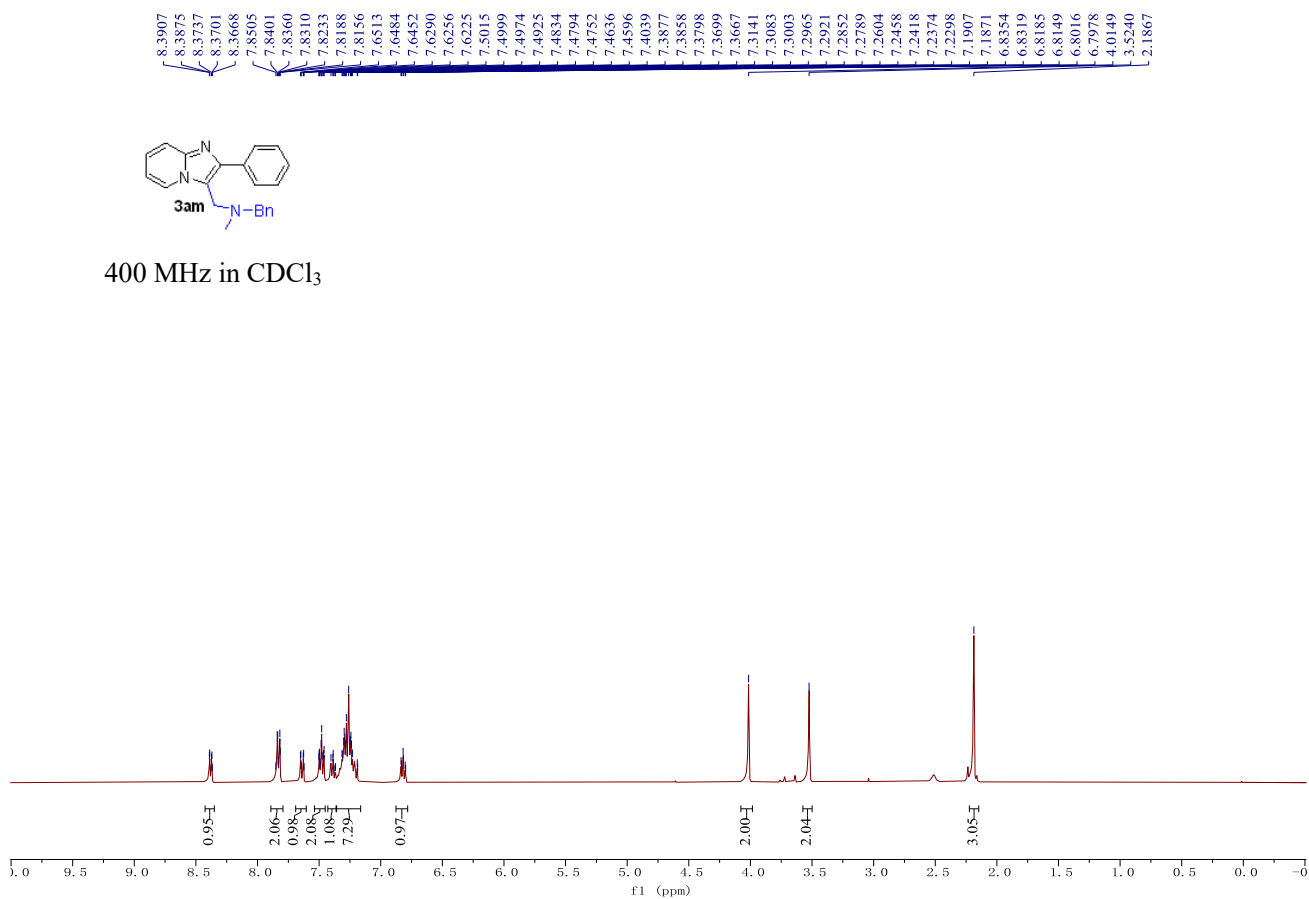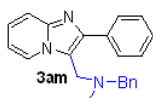

100 MHz in CDCl<sub>3</sub>

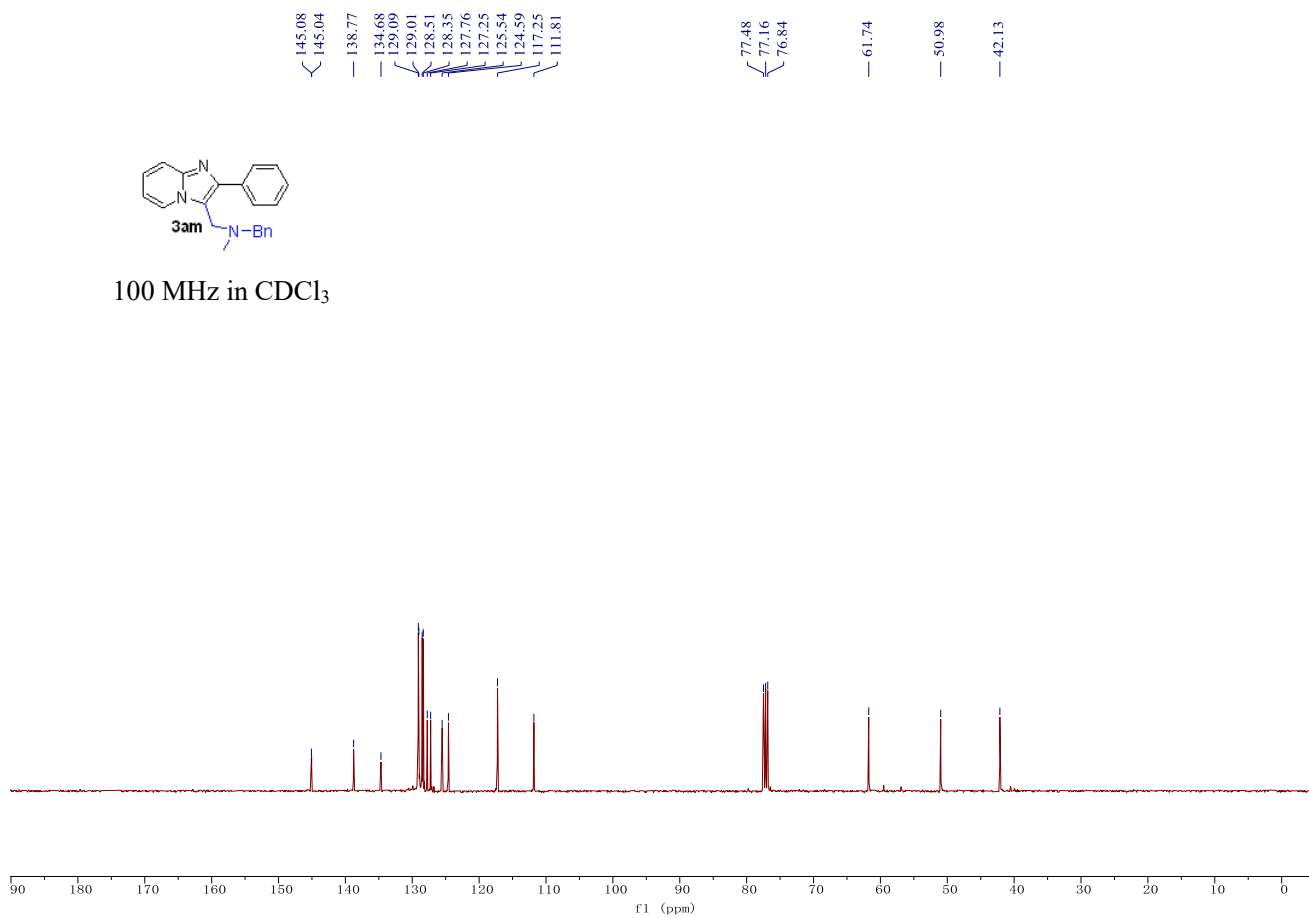



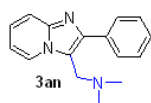

400 MHz in CDCl<sub>3</sub>

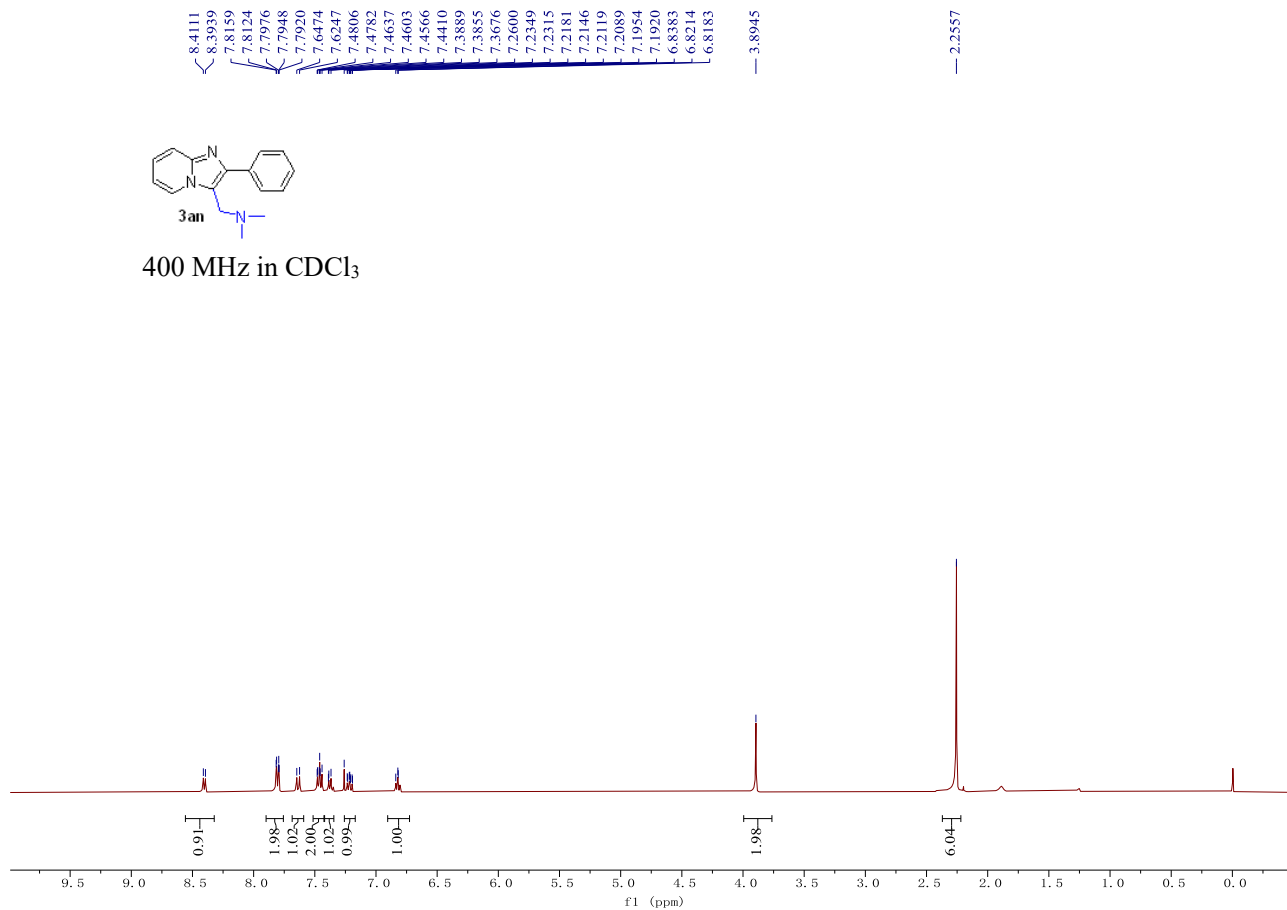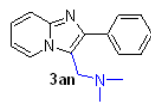

100 MHz in CDCl<sub>3</sub>

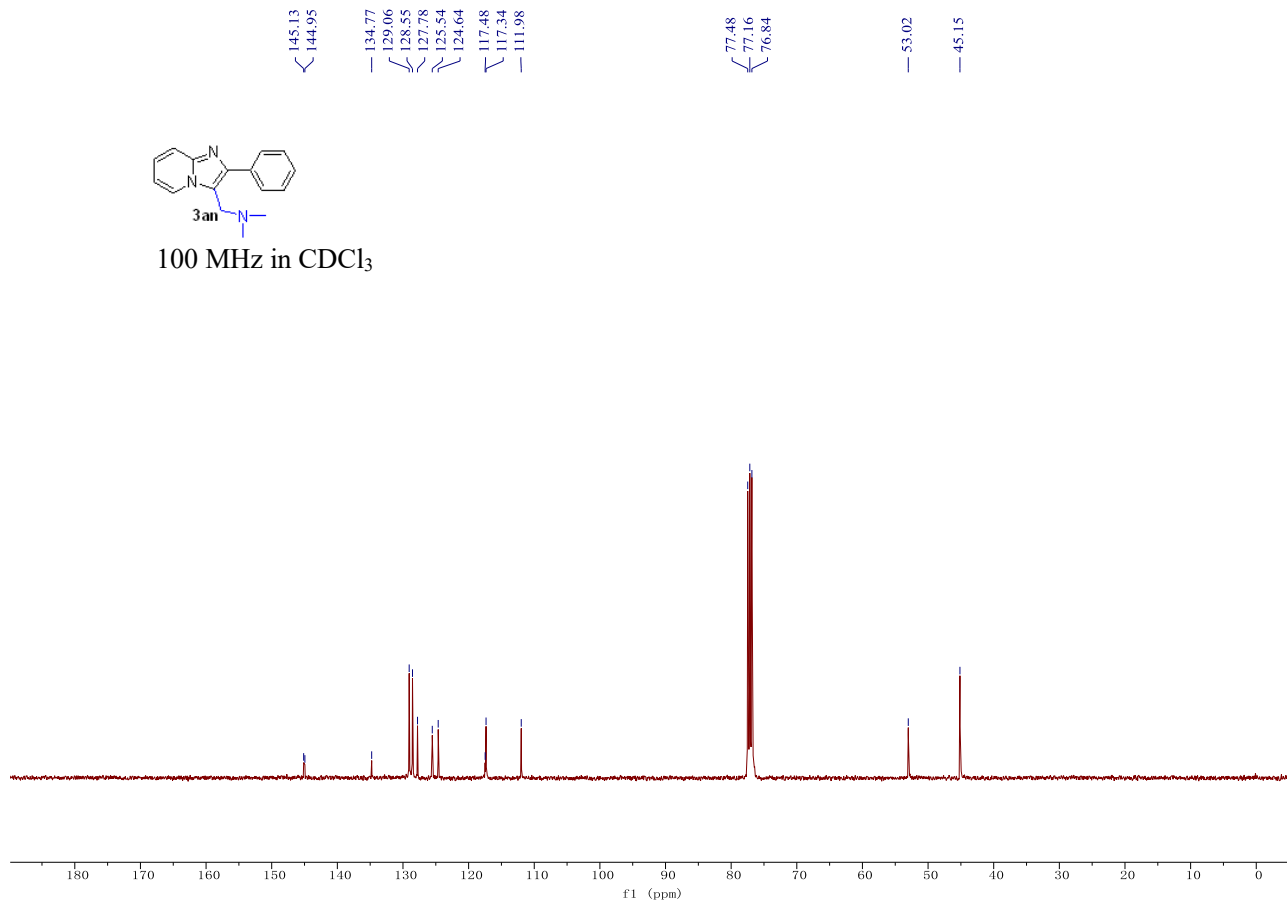

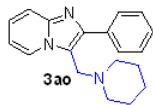

400 MHz in CDCl<sub>3</sub>

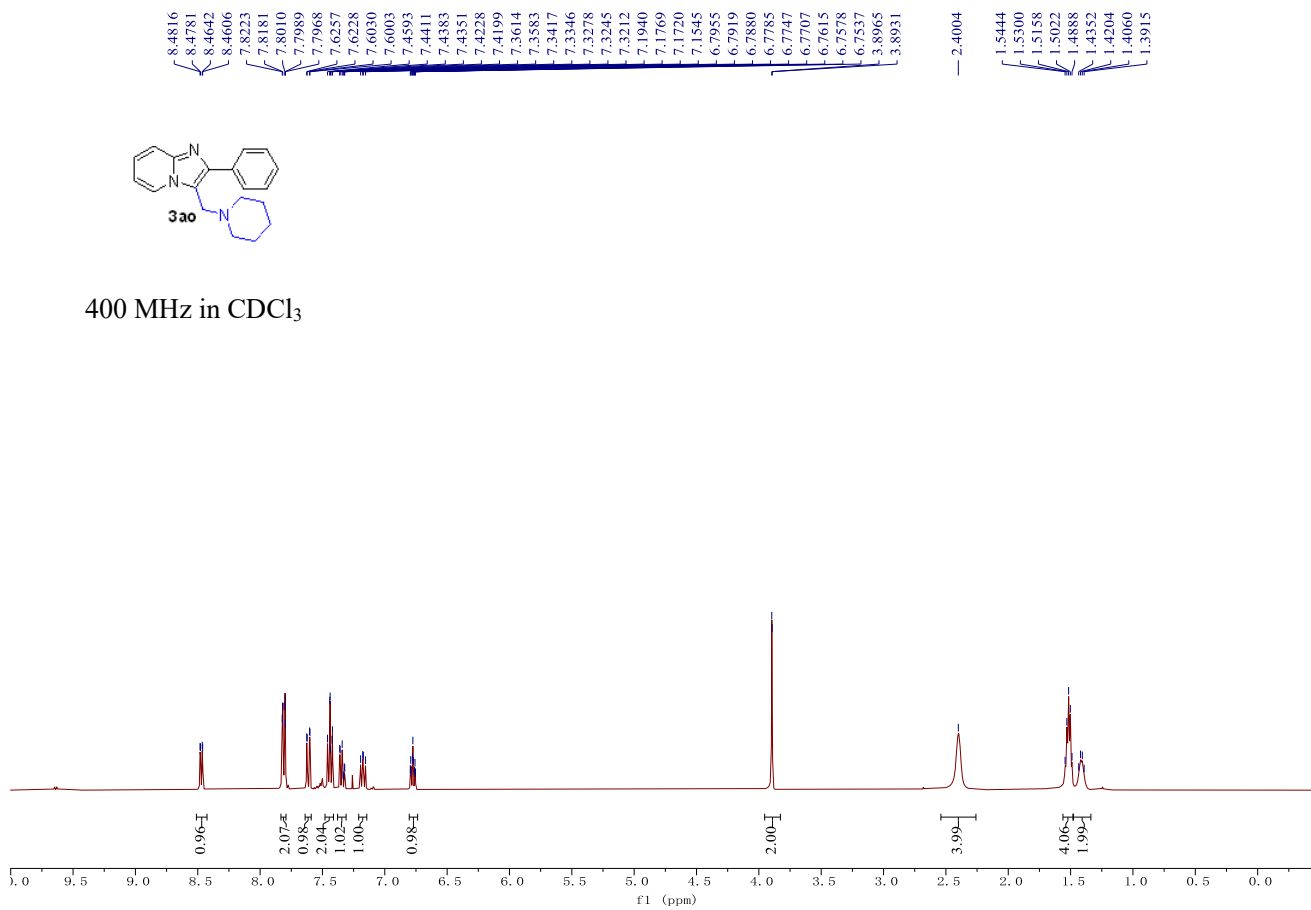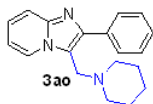

100 MHz in CDCl<sub>3</sub>

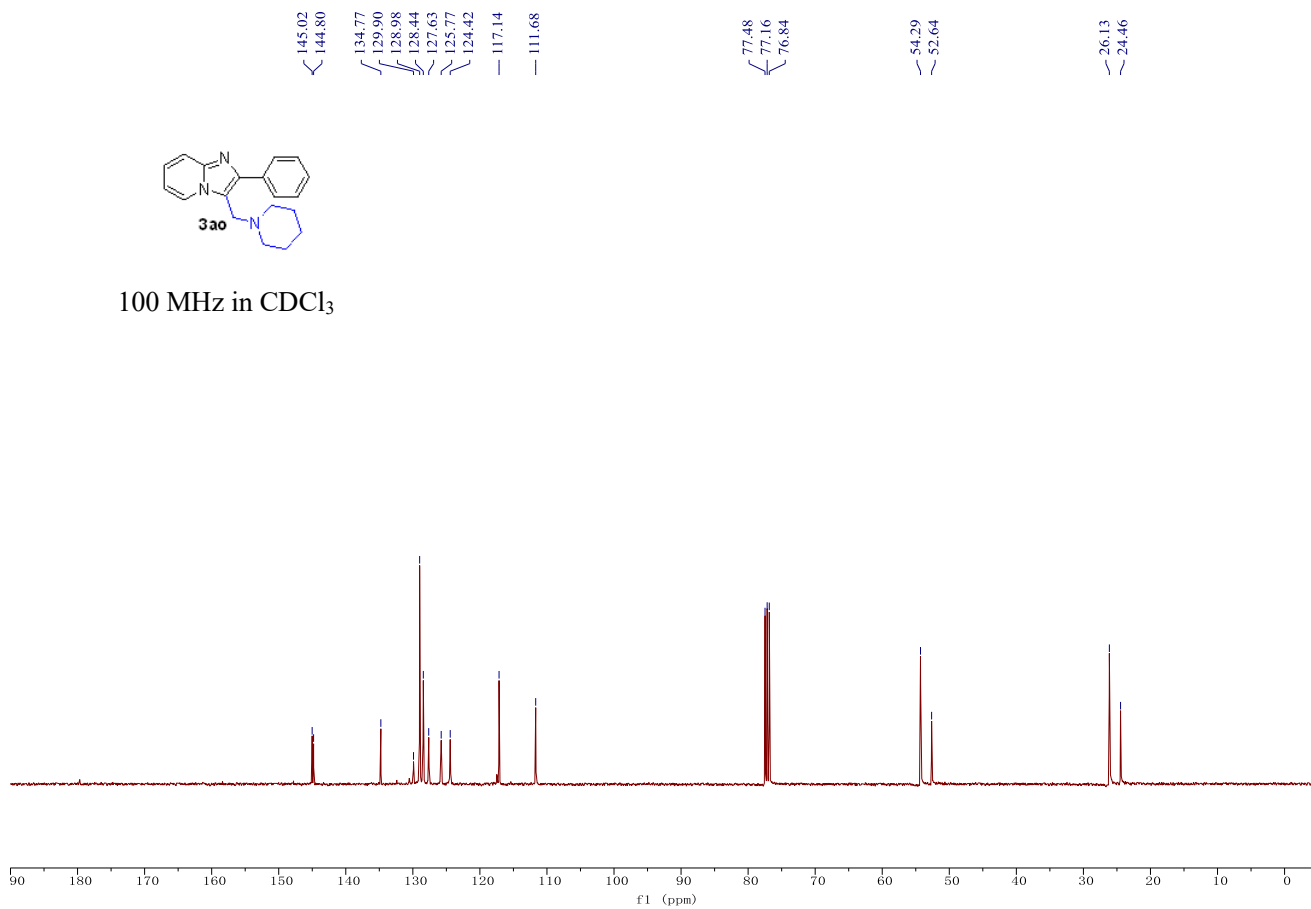

8.0511  
8.0482  
8.0452  
8.0339  
8.0309  
8.0280  
7.7355  
7.7302  
7.7188  
7.7134  
7.6761  
7.6733  
7.6704  
7.6533  
7.6506  
7.6478  
7.3394  
7.3212  
7.3172  
7.2990  
7.2960  
7.2388  
7.2357  
7.2220  
7.2188  
7.2162  
7.2130  
7.1994  
7.1962  
7.0097  
7.0037  
7.0005  
6.9875  
6.9808  
6.9784  
6.8903  
6.8877  
6.8850  
6.8721  
6.8695  
6.8669  
6.8538  
6.8512  
6.8485  
6.7899  
6.7869  
6.7729  
6.7698  
6.7559  
6.7528  
4.8087  
3.8542  
2.7022

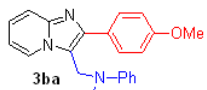

400 MHz in CDCl<sub>3</sub>

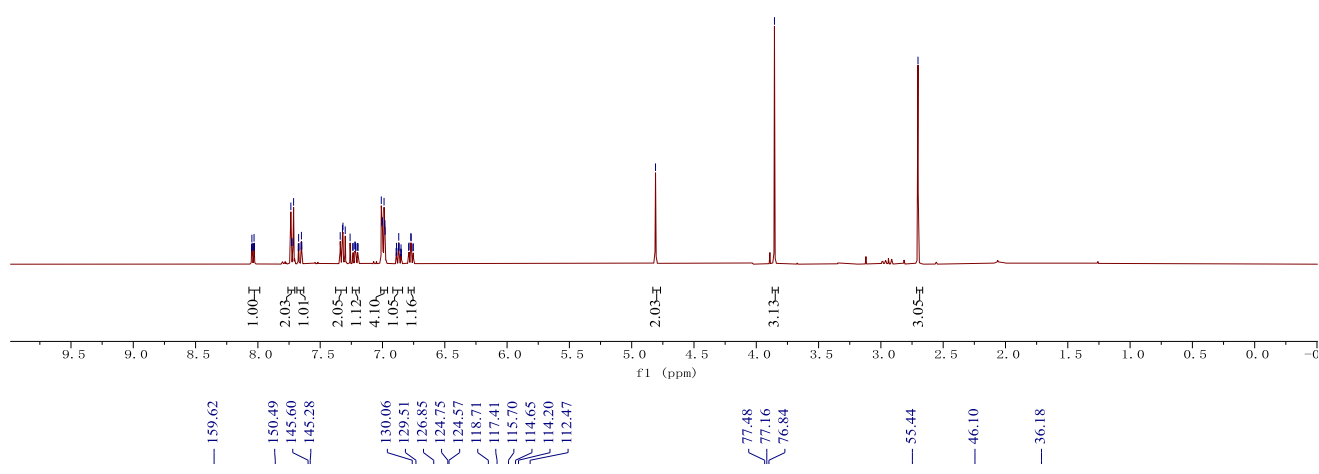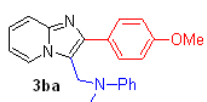

100 MHz in CDCl<sub>3</sub>

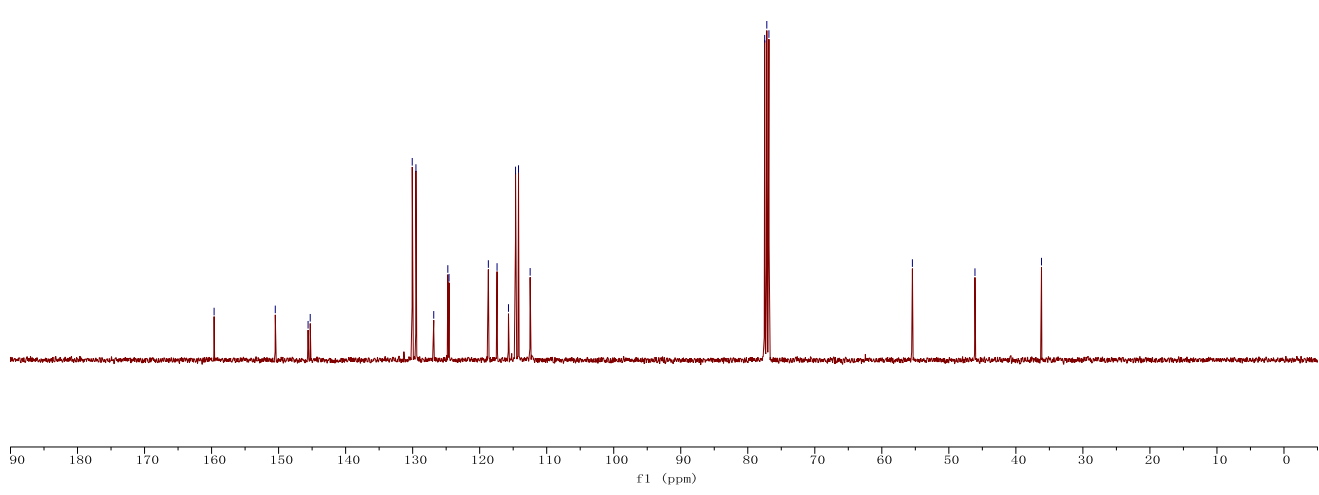

8.0801  
8.0772  
8.0742  
8.0629  
8.0600  
8.0569  
7.7025  
7.6996  
7.6968  
7.6797  
7.6769  
7.6741  
7.3769  
7.3754  
7.3692  
7.3678  
7.3518  
7.3498  
7.3355  
7.3172  
7.3133  
7.2950  
7.2600  
7.2580  
7.2550  
7.2412  
7.2380  
7.2354  
7.2322  
7.2185  
7.2154  
7.0026  
7.0000  
6.9975  
6.9803  
6.9778  
6.9528  
6.9468  
6.9467  
6.9410  
6.9353  
6.9282  
6.9230  
6.8912  
6.8884  
6.8859  
6.8729  
6.8701  
6.8675  
6.8546  
6.8520  
6.8497  
6.8092  
6.8062  
6.7921  
6.7891  
6.7752  
6.7721  
4.8348  
3.8370  
2.7106

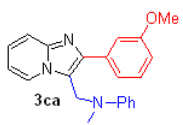

400 MHz in CDCl<sub>3</sub>

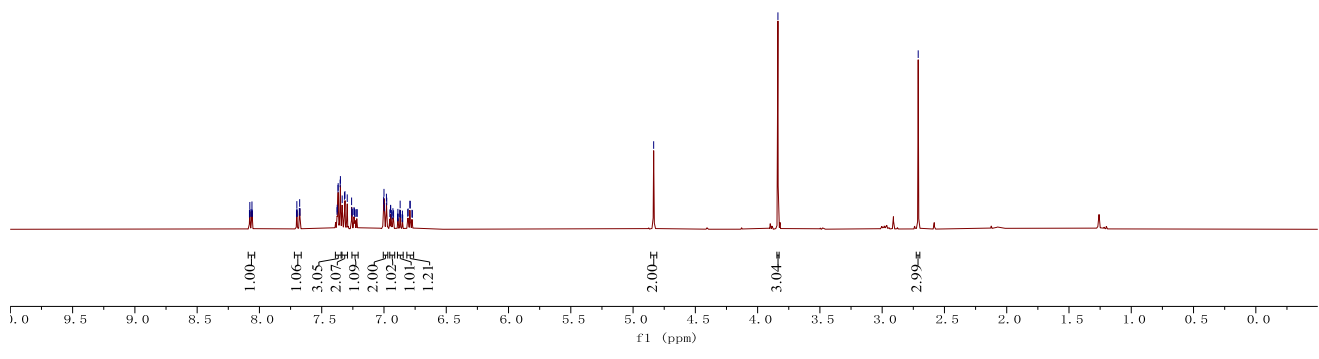

159.93  
150.46  
145.56  
145.27  
135.64  
129.70  
129.51  
124.96  
124.70  
121.29  
118.80  
117.59  
116.49  
114.71  
114.31  
113.90  
112.66  
77.48  
77.16  
76.84  
55.44  
46.05  
36.33

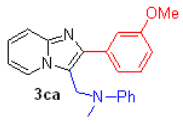

100 MHz in CDCl<sub>3</sub>

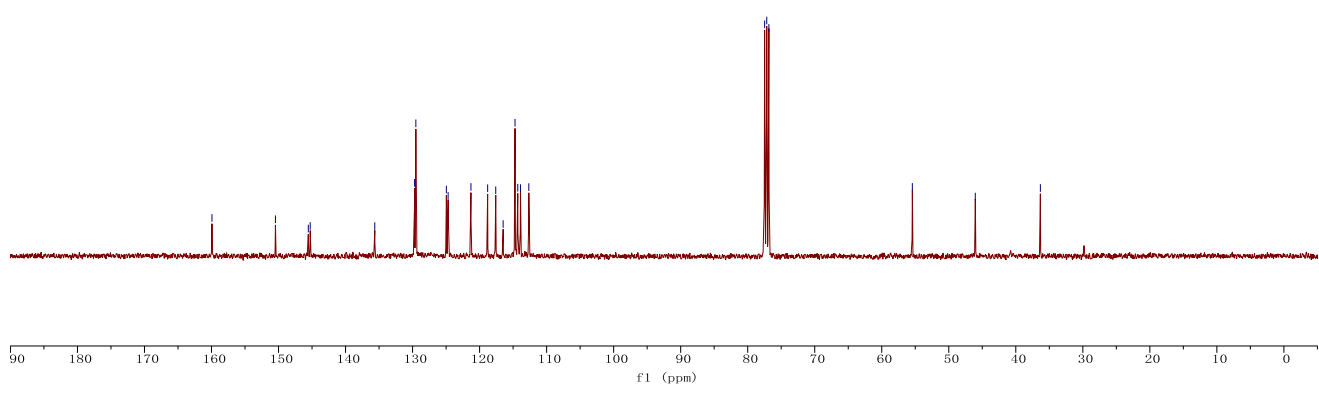

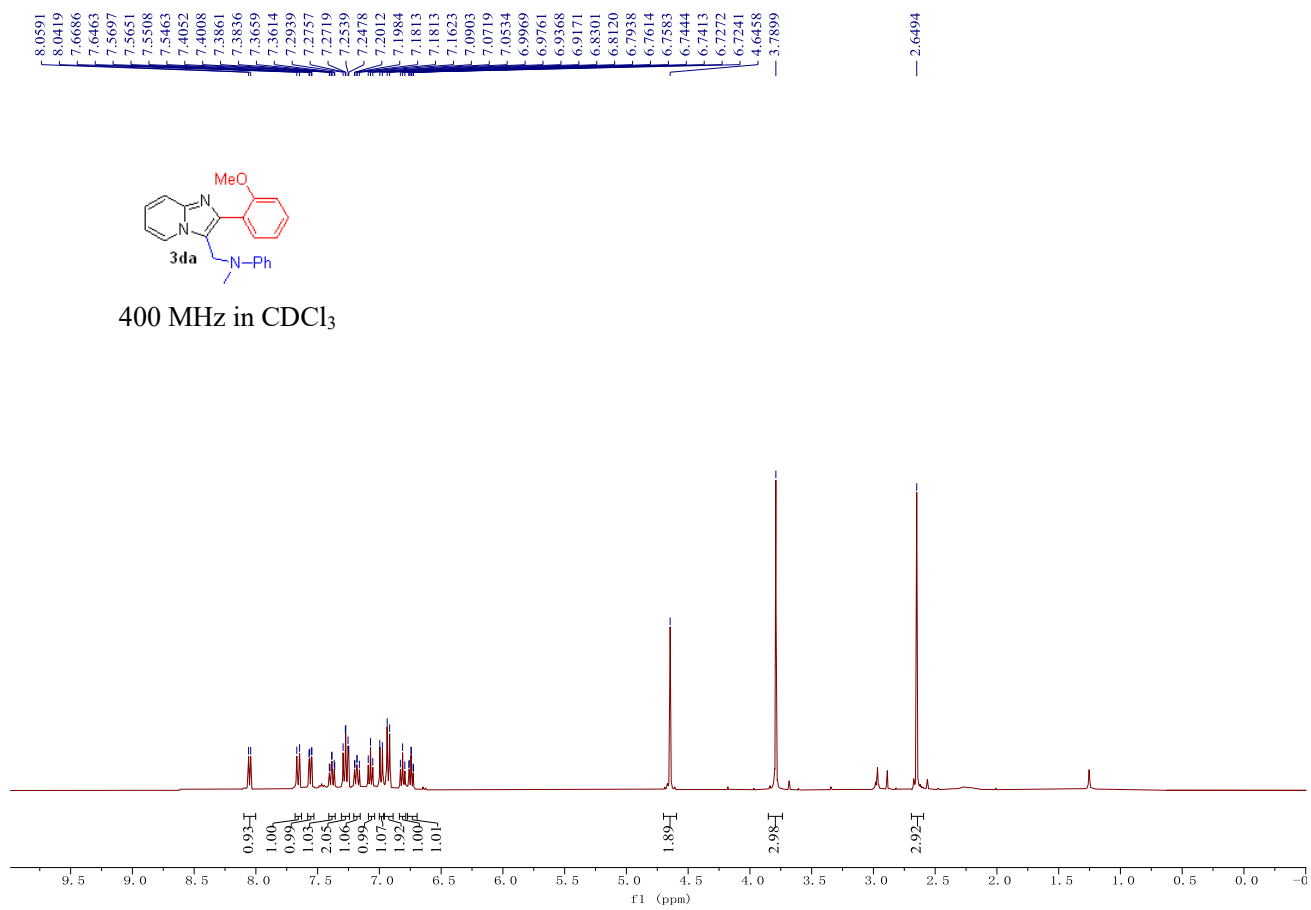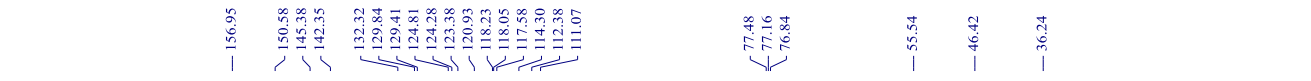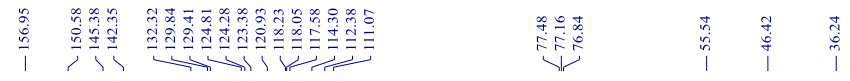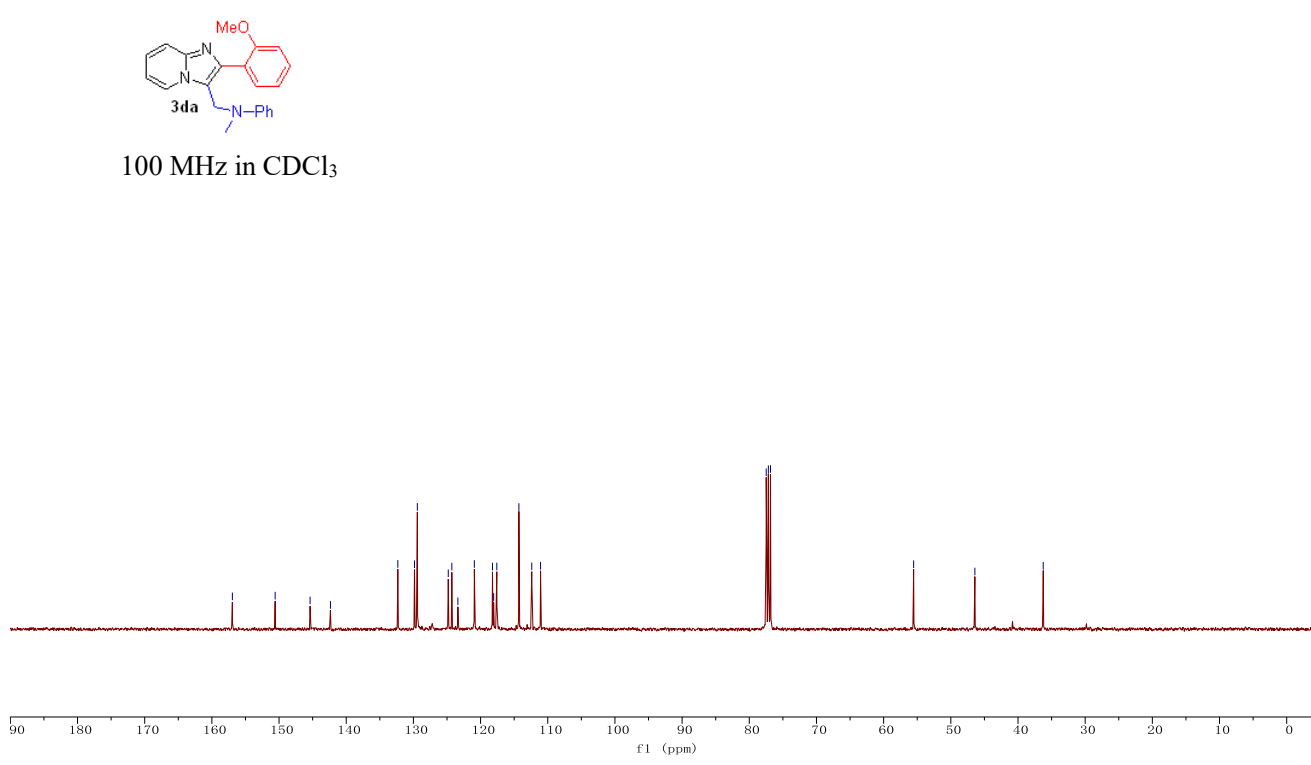

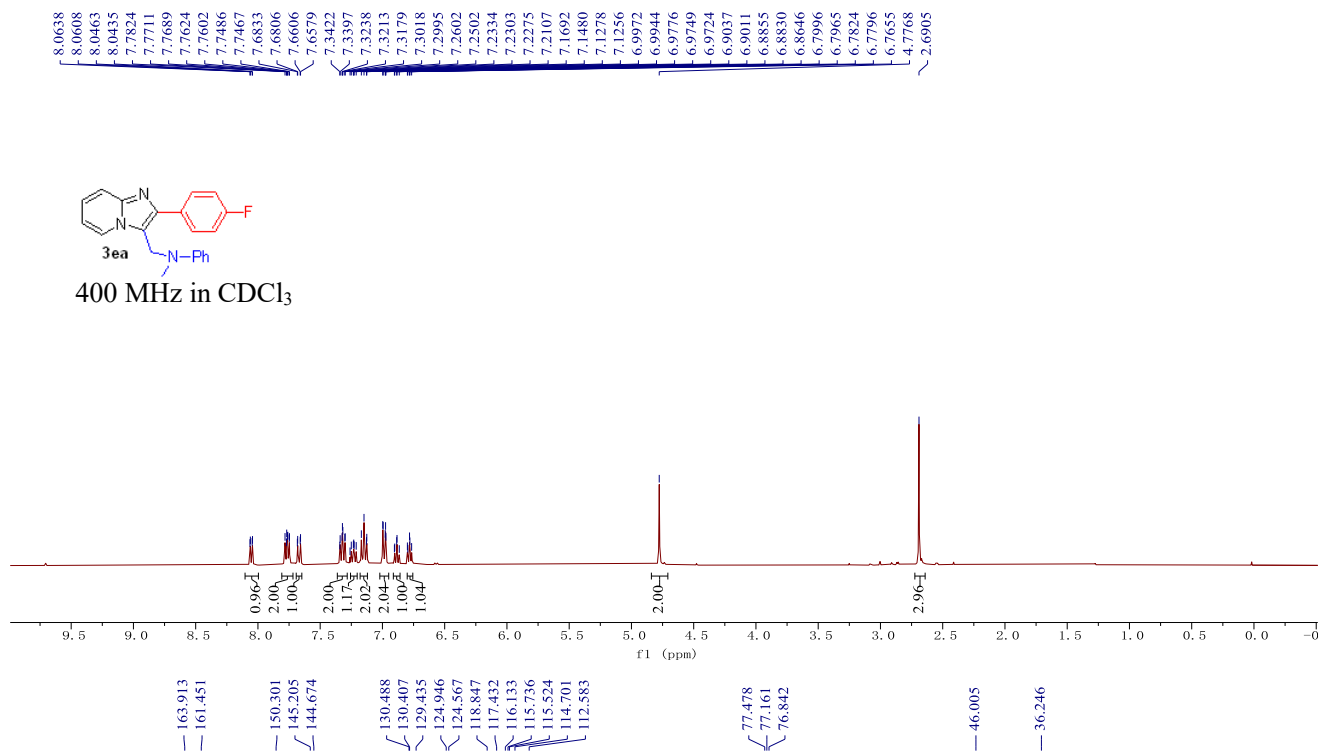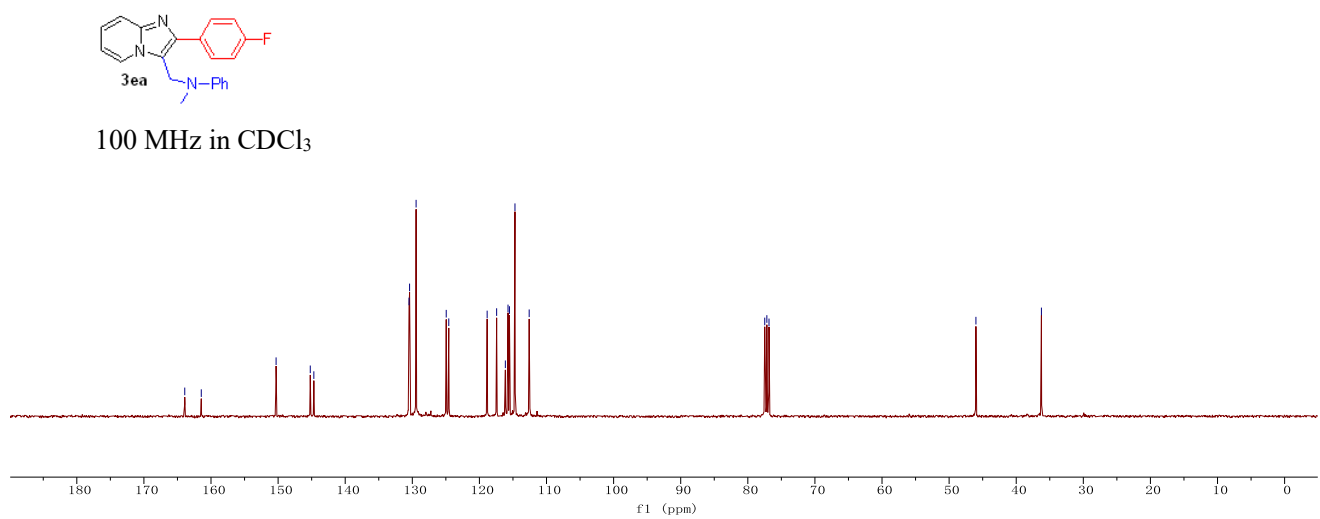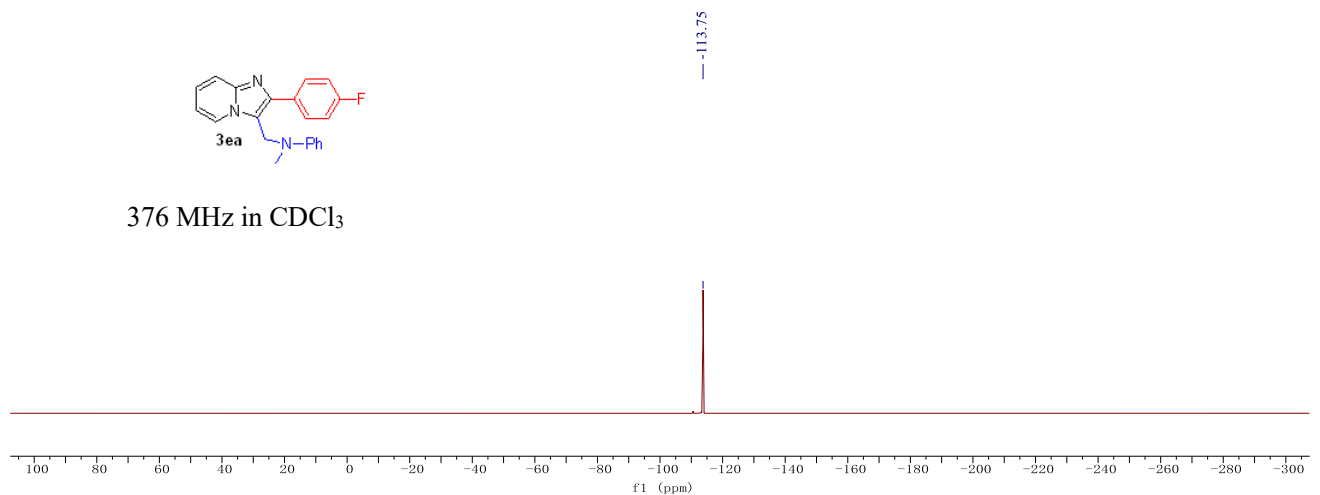

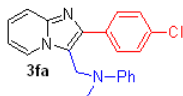

400 MHz in CDCl<sub>3</sub>

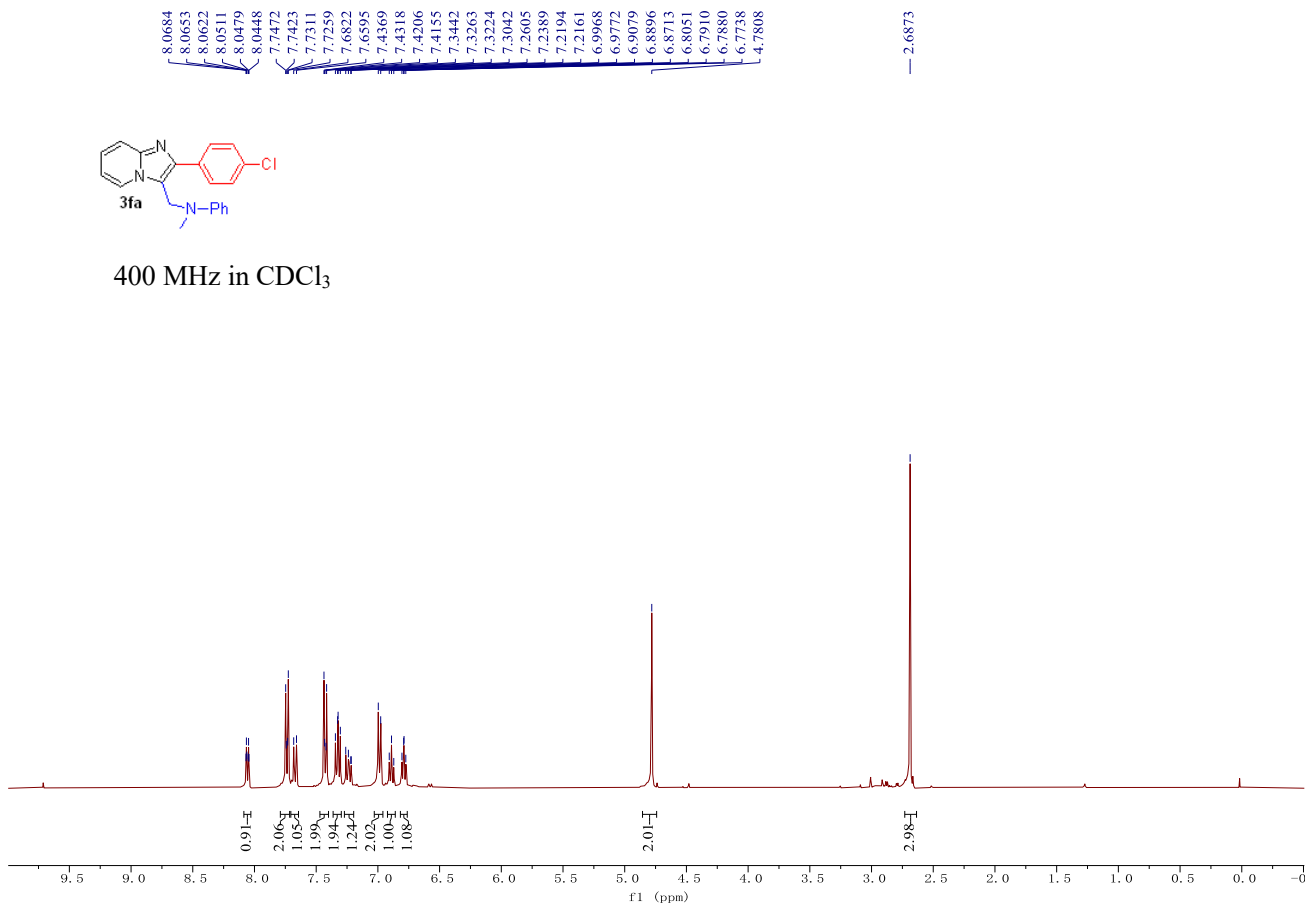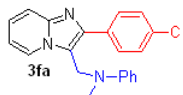

100 MHz in CDCl<sub>3</sub>

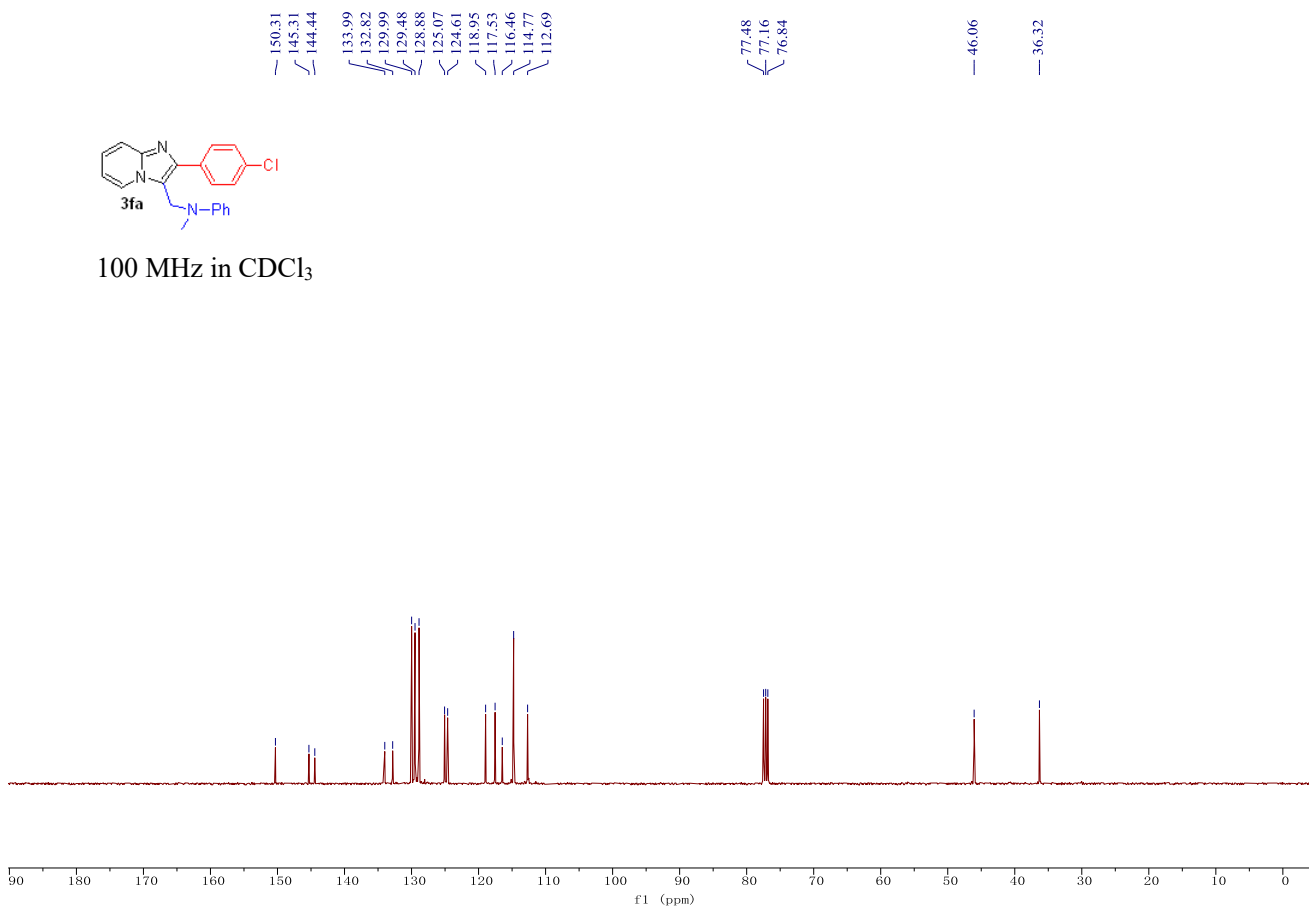

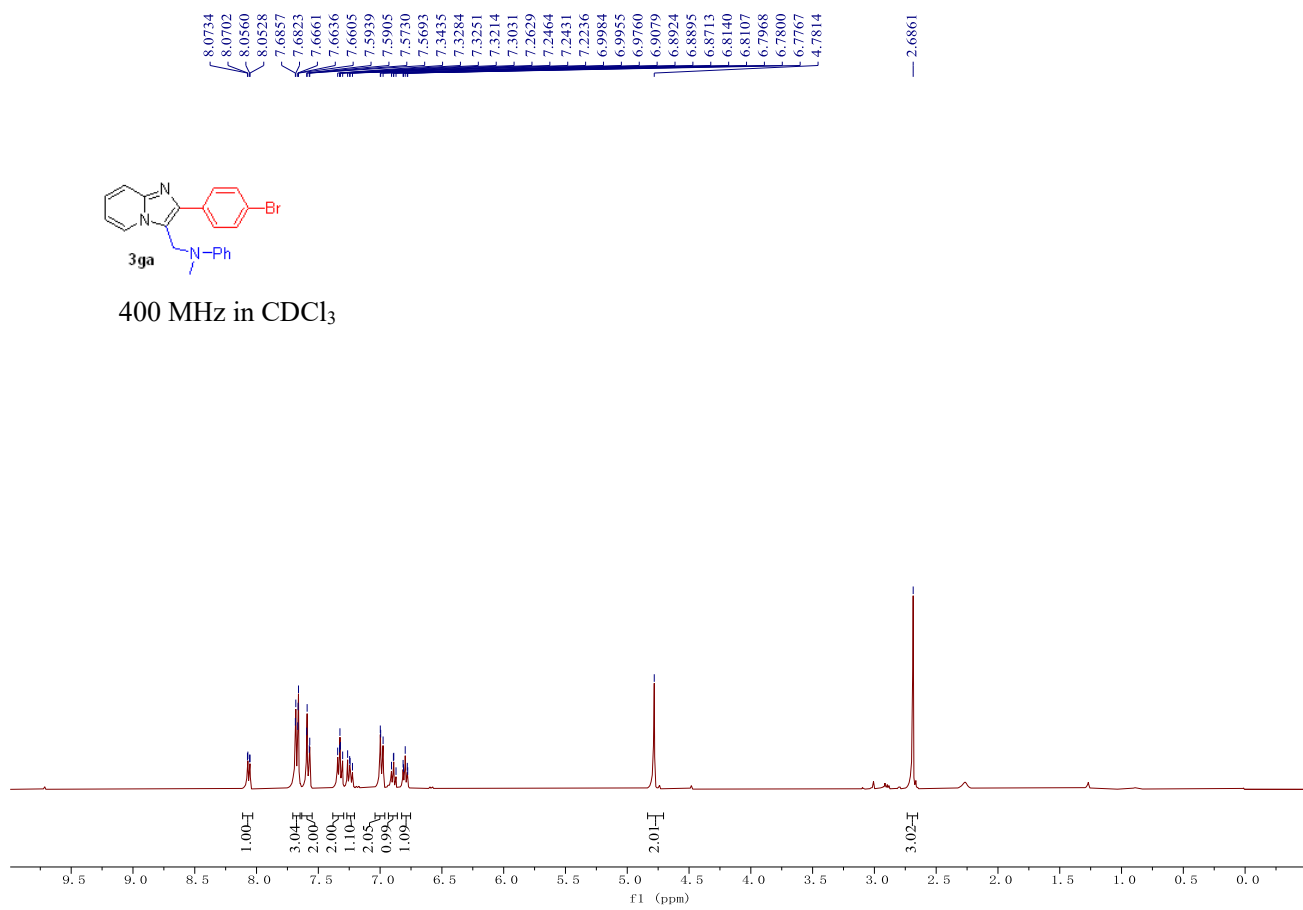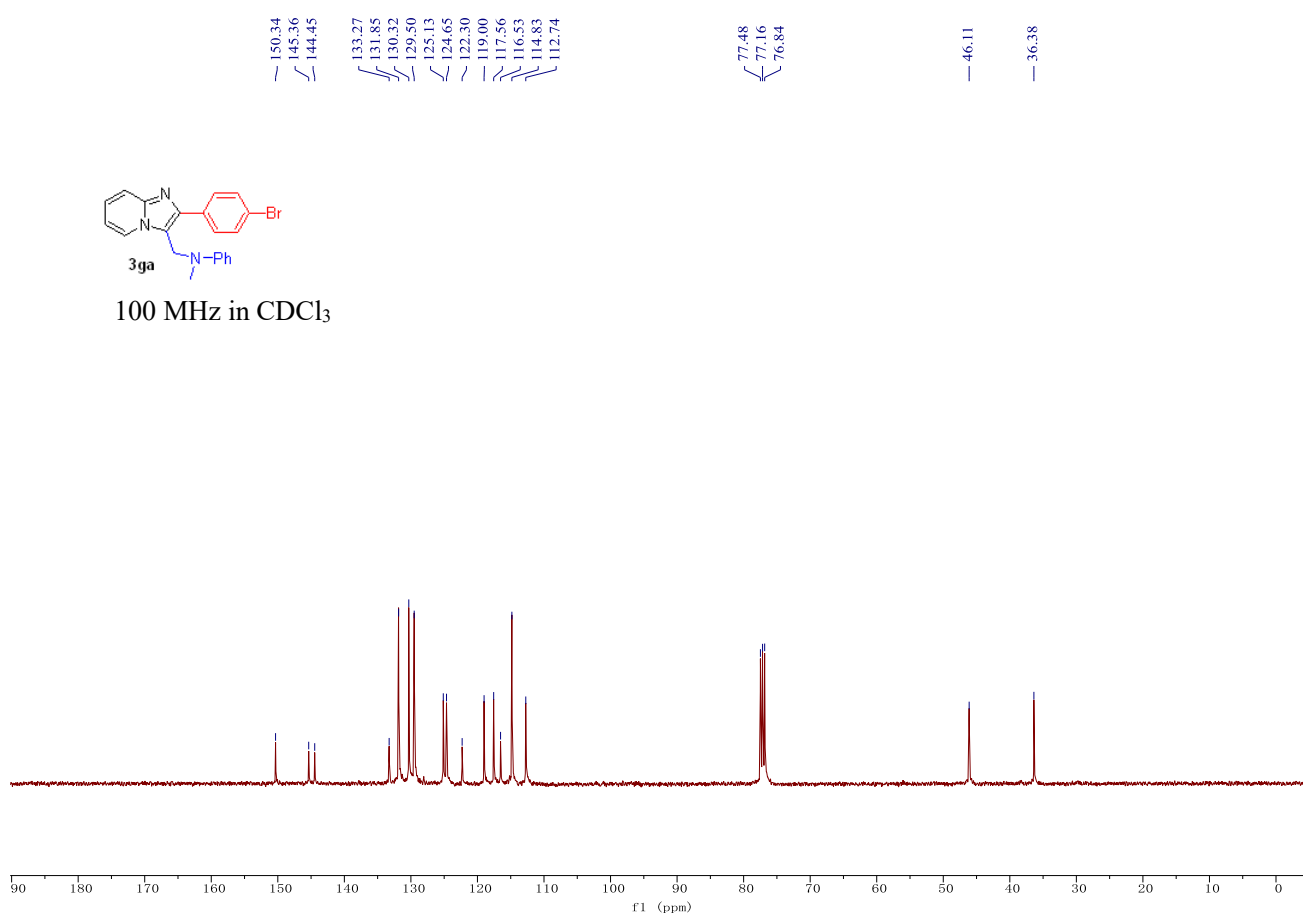



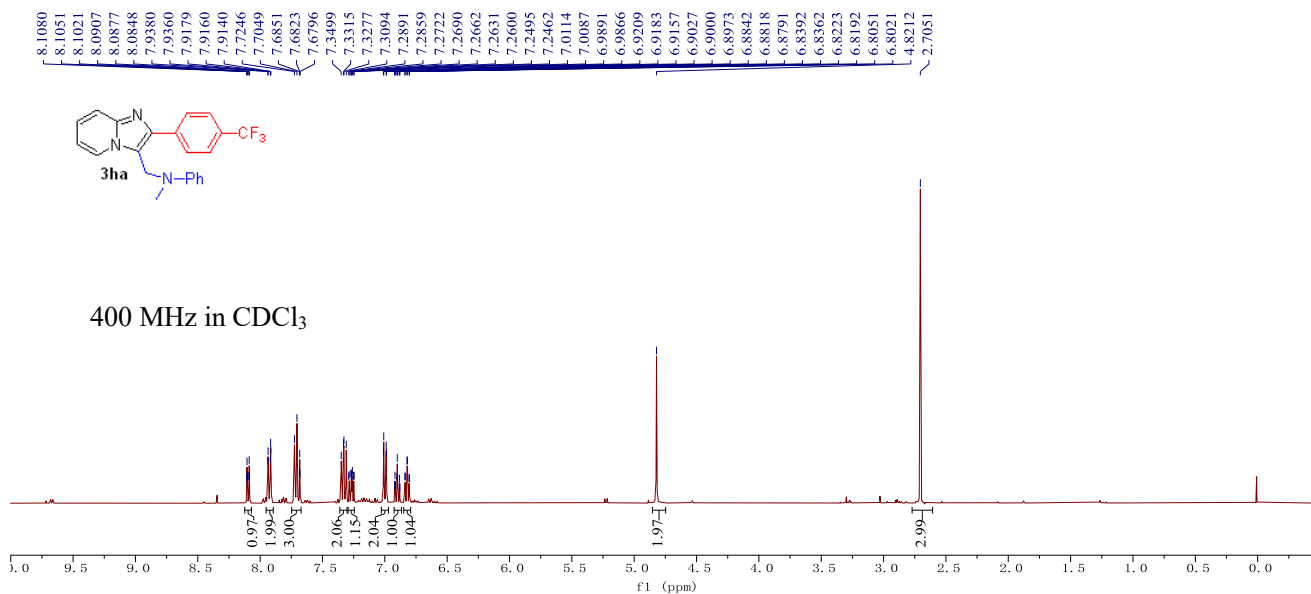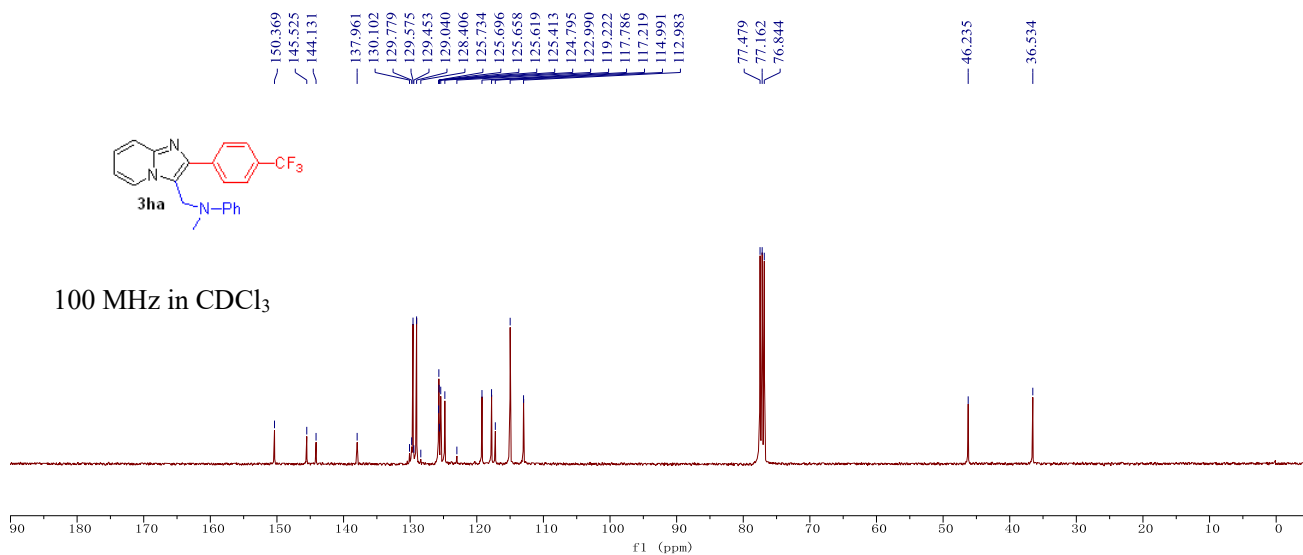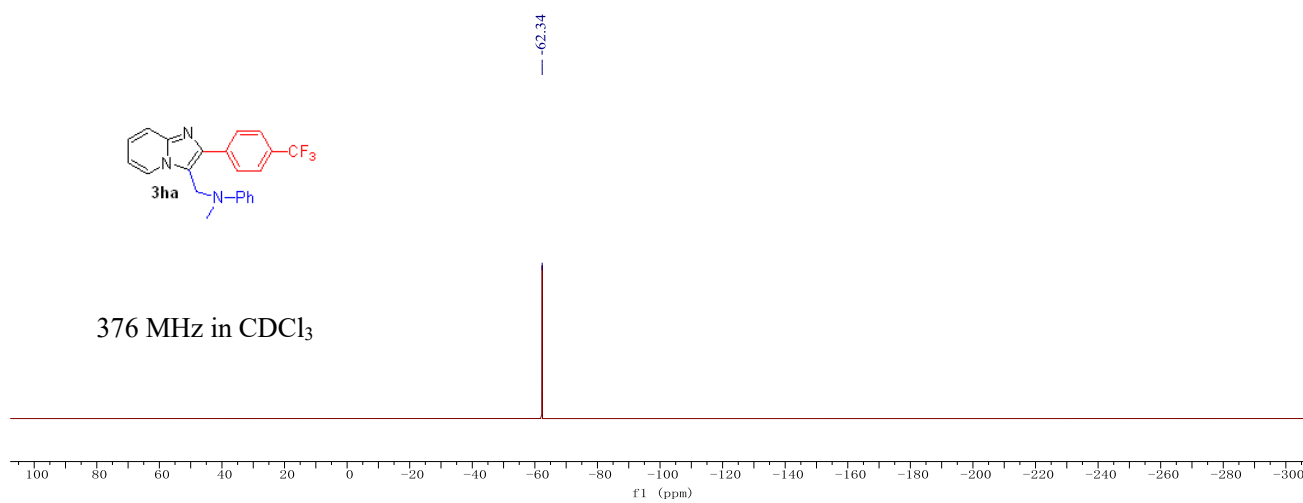

8.0592  
8.0557  
8.0523  
8.0419  
8.0385  
8.0352  
7.7036  
7.6976  
7.6944  
7.6836  
7.6717  
7.3447  
7.3263  
7.3225  
7.3043  
7.2874  
7.2682  
7.2600  
7.2444  
7.2412  
7.2276  
7.2242  
7.2215  
7.2184  
7.2049  
7.2016  
7.0069  
7.0042  
6.9846  
6.9821  
6.8958  
6.8932  
6.8905  
6.8776  
6.8749  
6.8722  
6.8591  
6.8565  
6.8538  
6.7925  
6.7899  
6.7871  
6.7752  
6.7729  
6.7702  
6.7584  
6.7558  
6.7530  
4.8247  
2.7011  
2.4110

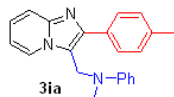

400 MHz in CDCl<sub>3</sub>

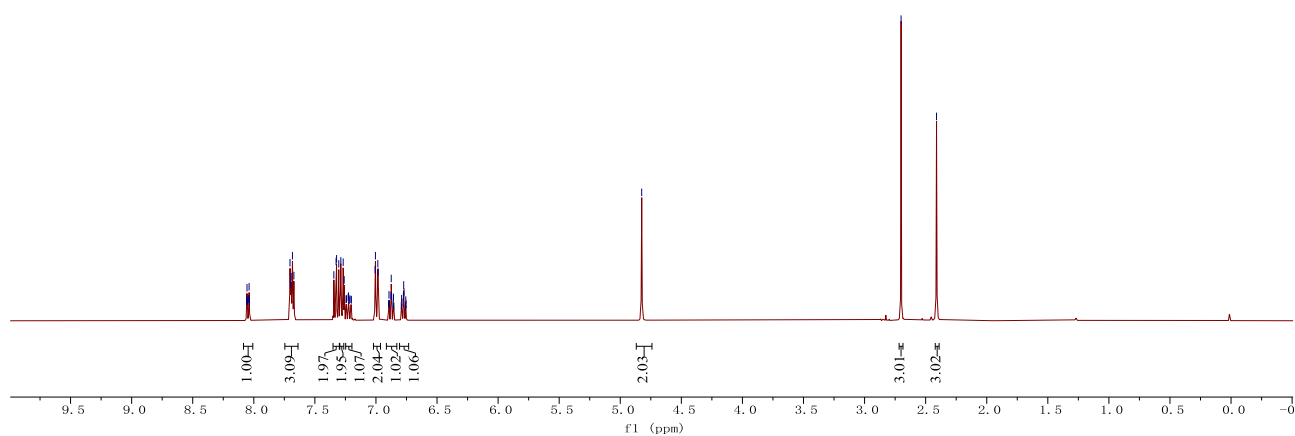

150.45  
145.73  
145.27  
137.85  
131.37  
129.47  
129.43  
128.70  
124.74  
124.61  
118.64  
117.45  
116.02  
114.58  
112.46  
77.48  
77.16  
76.85  
46.01  
36.12  
21.37

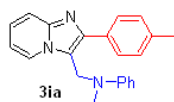

100 MHz in CDCl<sub>3</sub>

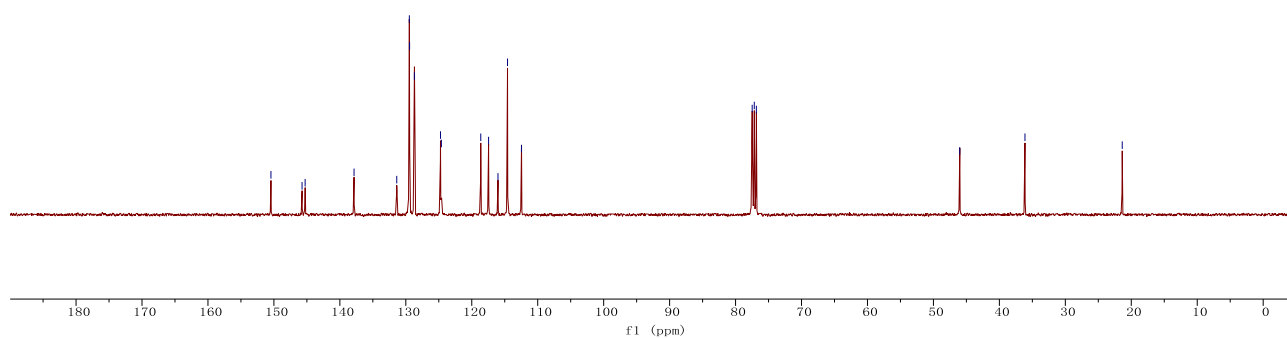

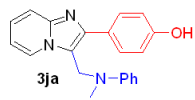

400 MHz in CDCl<sub>3</sub>

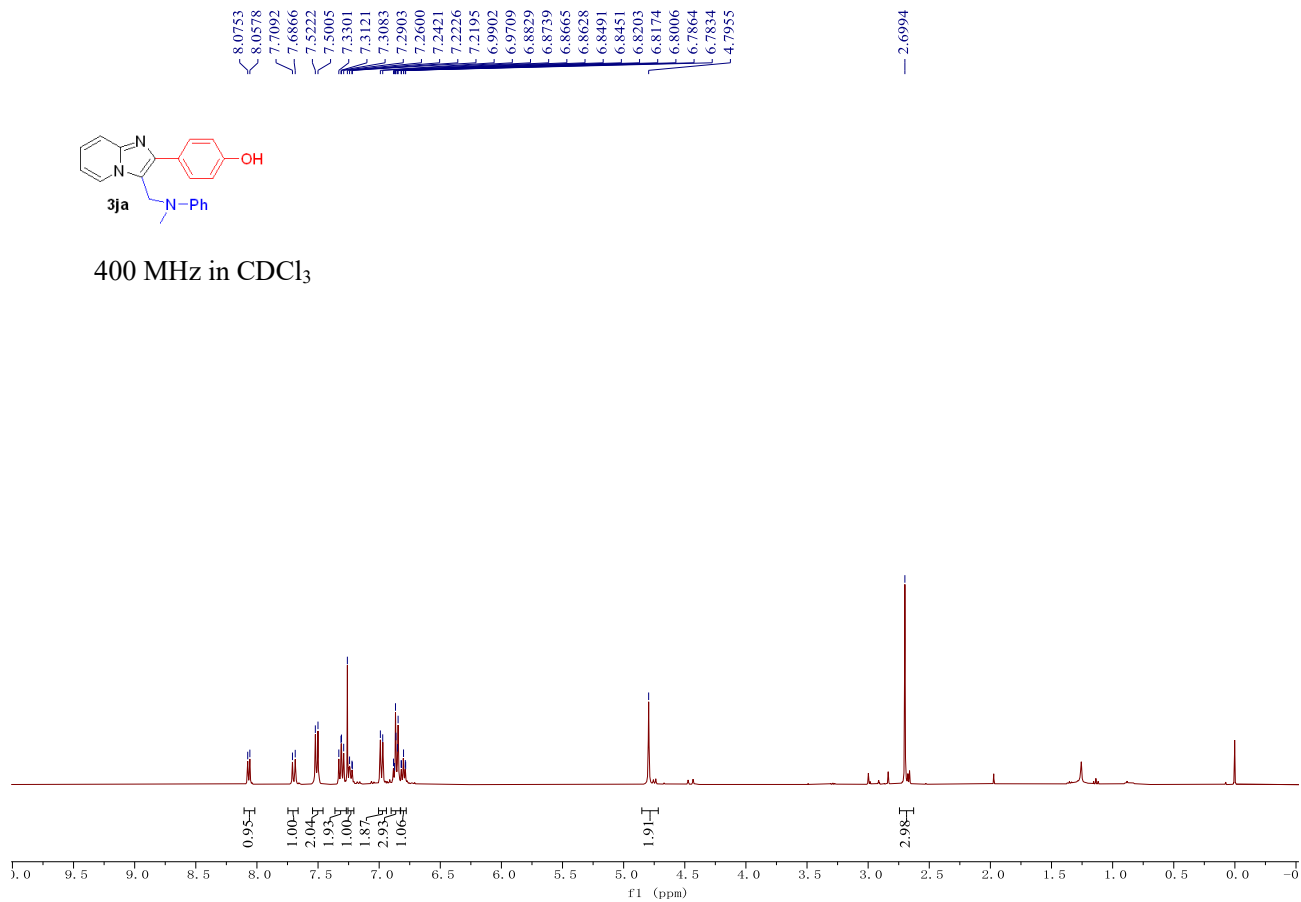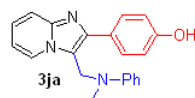

100 MHz in CDCl<sub>3</sub>

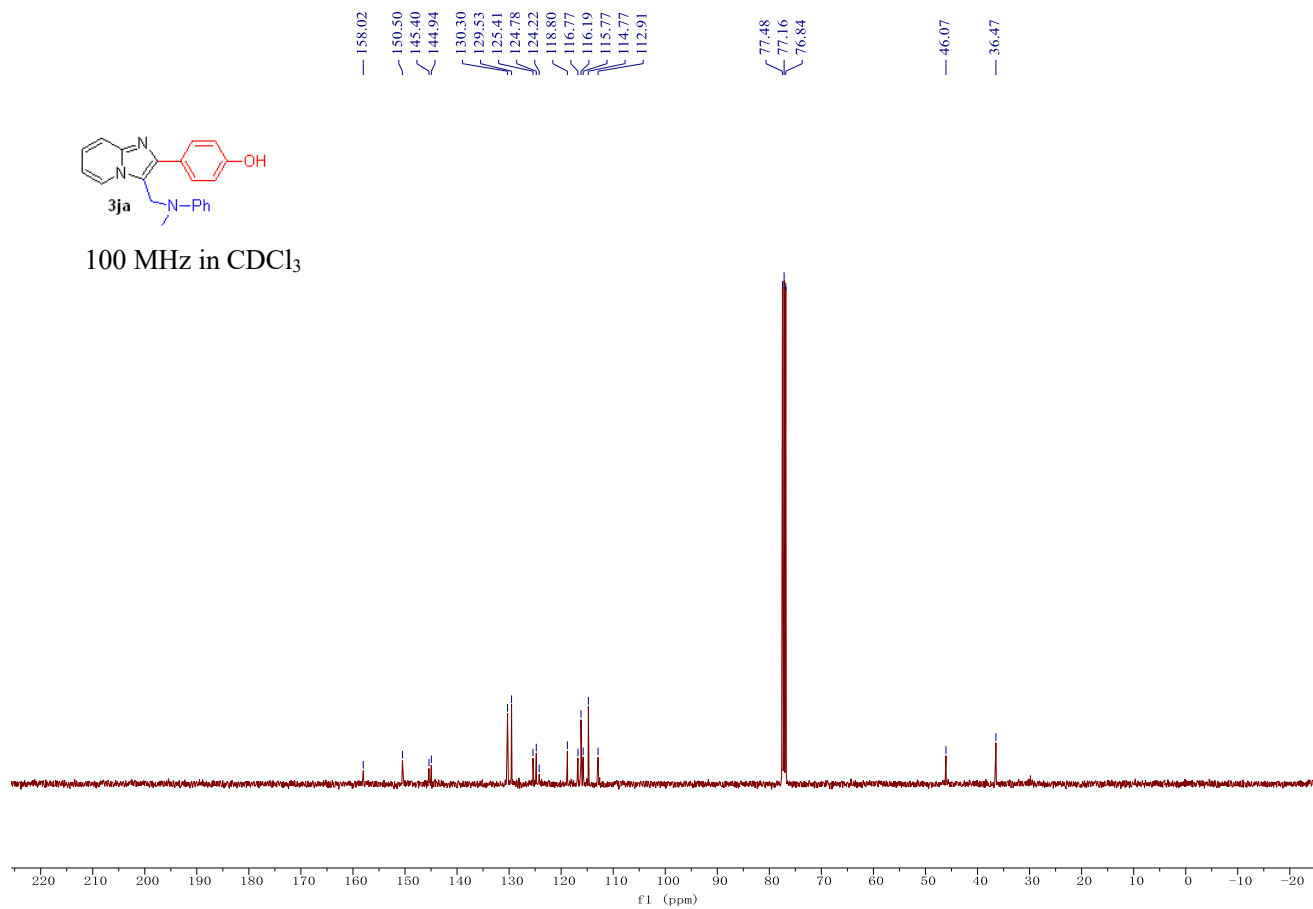

8.2601  
8.0883  
8.0850  
8.0710  
8.0679  
7.9964  
7.9867  
7.9752  
7.9709  
7.9472  
7.9258  
7.8832  
7.8788  
7.8761  
7.8682  
7.8602  
7.8577  
7.8530  
7.7414  
7.7379  
7.7185  
7.7152  
7.5060  
7.4978  
7.4903  
7.4821  
7.3469  
7.3287  
7.3248  
7.3067  
7.2604  
7.2473  
7.2438  
7.2247  
7.0149  
7.0127  
6.9930  
6.9095  
6.8939  
6.8912  
6.8729  
6.8035  
6.8004  
6.7866  
6.7835  
6.7694  
4.8752  
2.7248

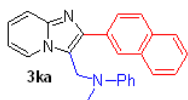

400 MHz in CDCl<sub>3</sub>

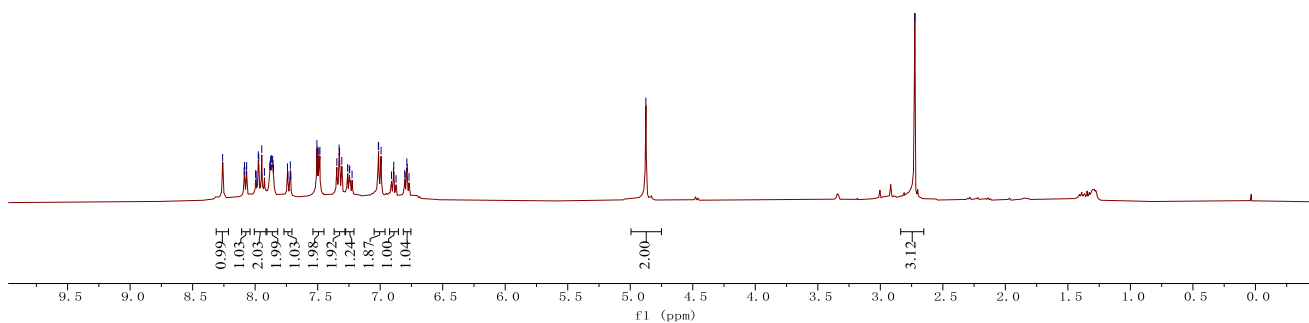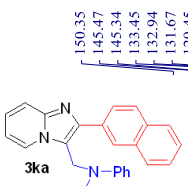

100 MHz in CDCl<sub>3</sub>

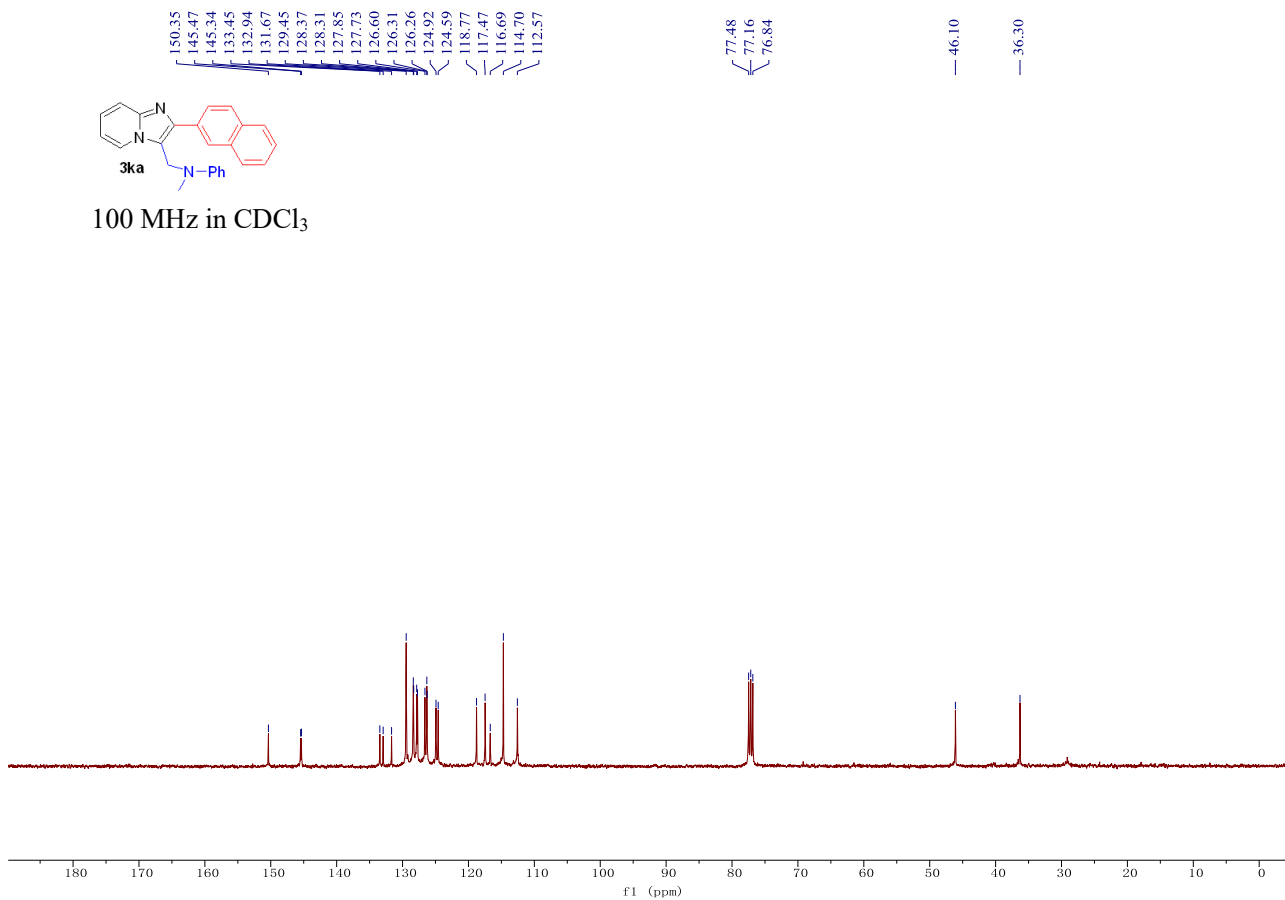

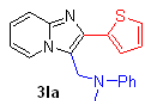

400 MHz in CDCl<sub>3</sub>

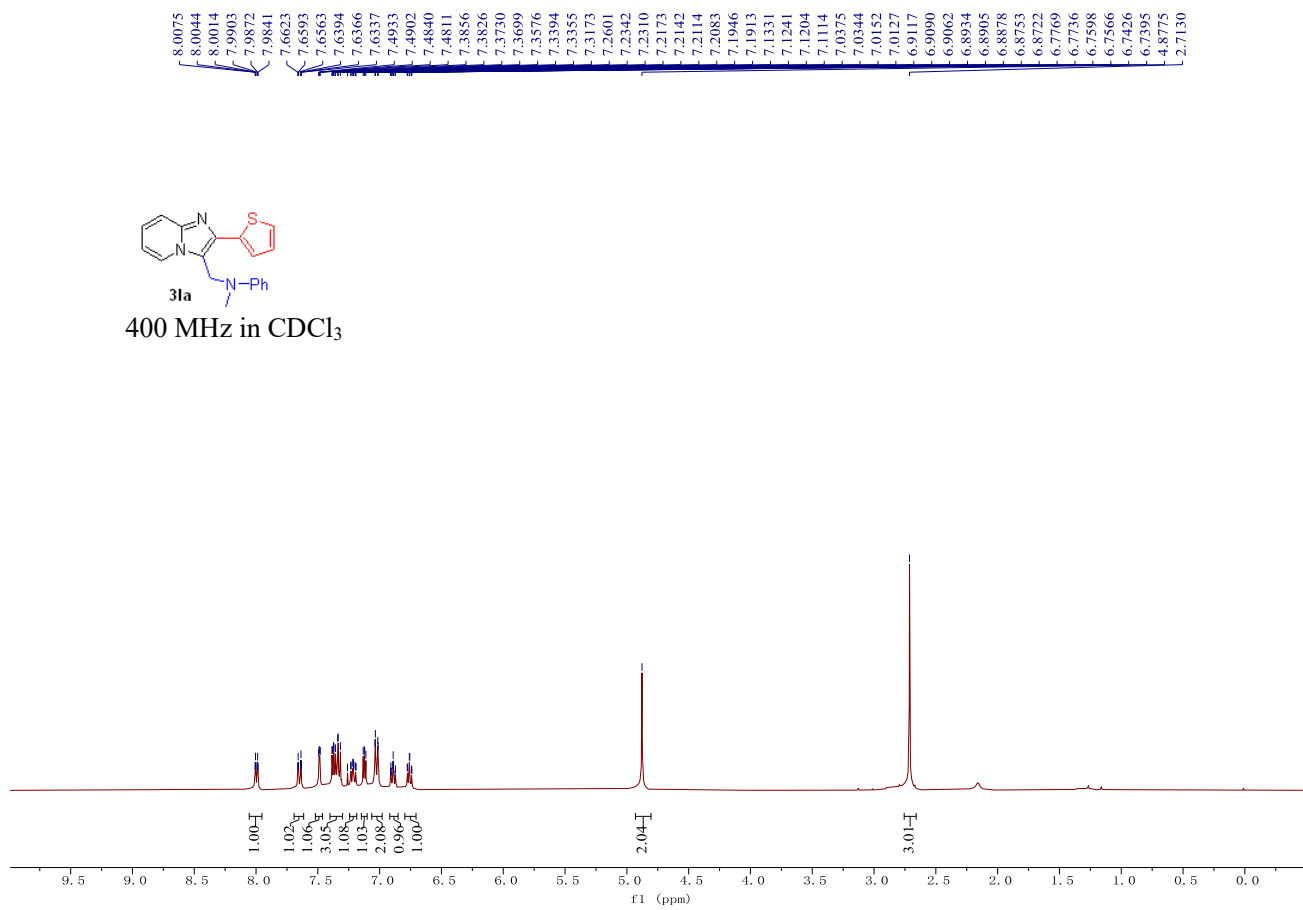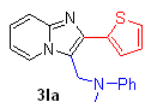

100 MHz in CDCl<sub>3</sub>

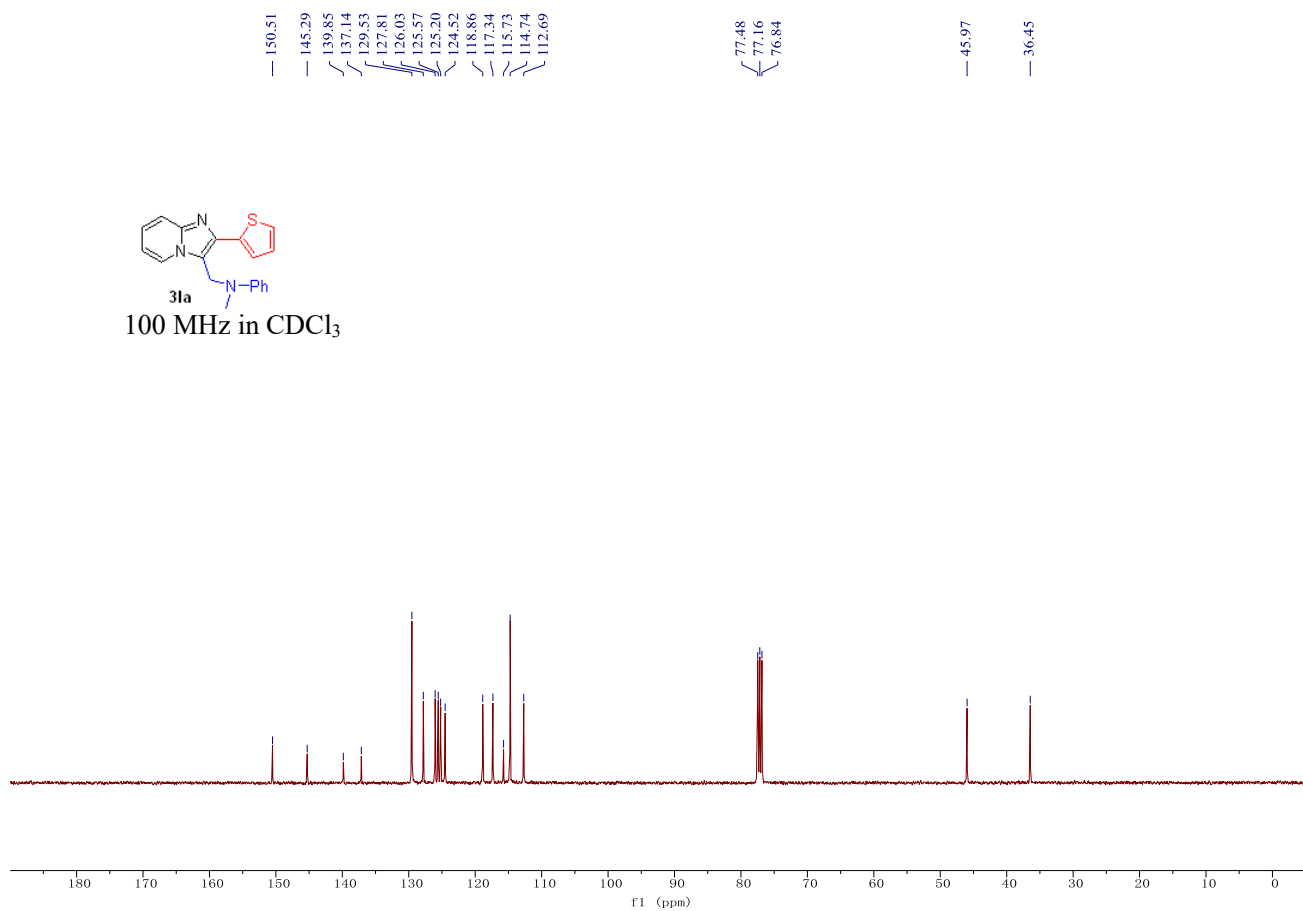

7.9544  
7.9512  
7.9481  
7.9373  
7.9341  
7.9309  
7.6411  
7.6381  
7.6351  
7.6186  
7.6155  
7.6124  
7.3741  
7.3562  
7.3522  
7.3340  
7.2605  
7.1794  
7.1762  
7.1627  
7.1595  
7.1535  
7.1399  
7.1367  
7.0302  
7.0272  
7.0076  
6.8991  
6.8838  
6.8808  
6.8779  
6.8626  
6.7325  
6.7294  
6.7154  
6.7123  
6.6985  
6.6954  
4.8175

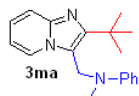

400 MHz in CDCl<sub>3</sub>

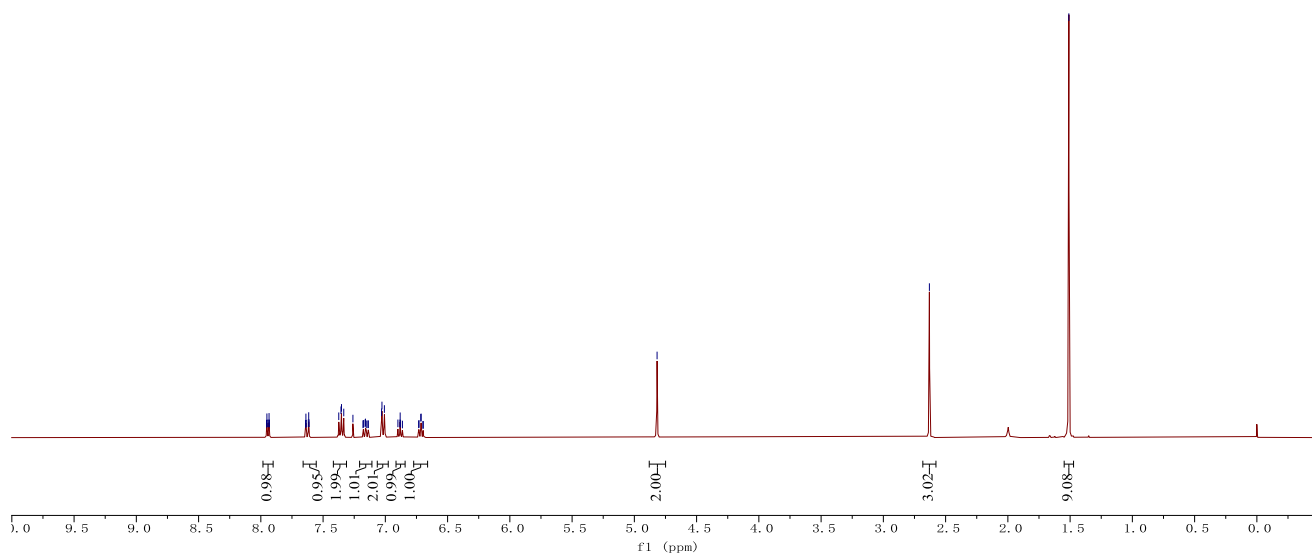

154.28  
150.49  
143.90  
129.55  
124.32  
124.00  
118.46  
117.12  
114.39  
114.30  
112.17  
77.48  
77.16  
76.84  
45.92  
35.12  
33.63  
31.44

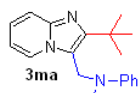

100 MHz in CDCl<sub>3</sub>

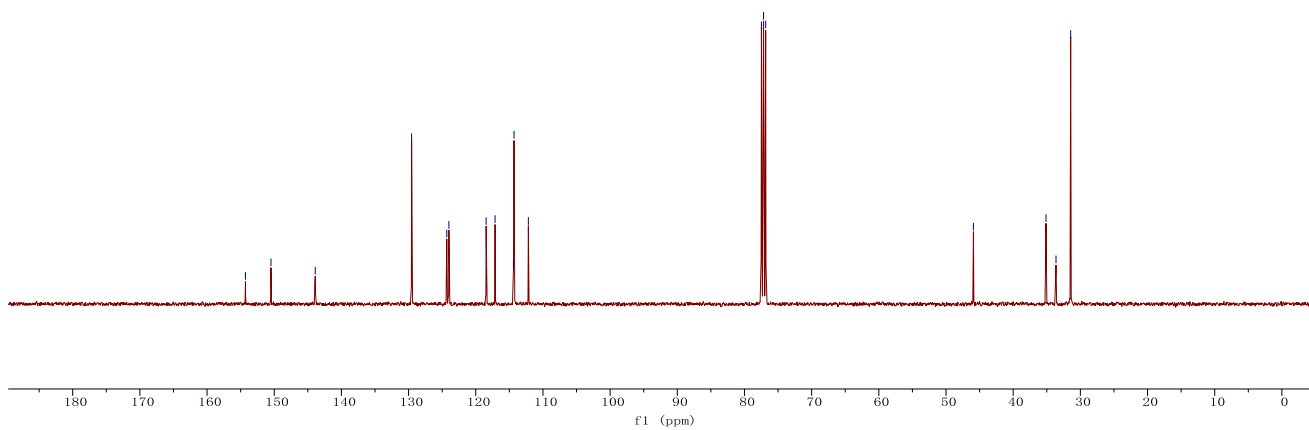

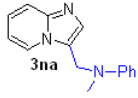

400 MHz in CDCl<sub>3</sub>

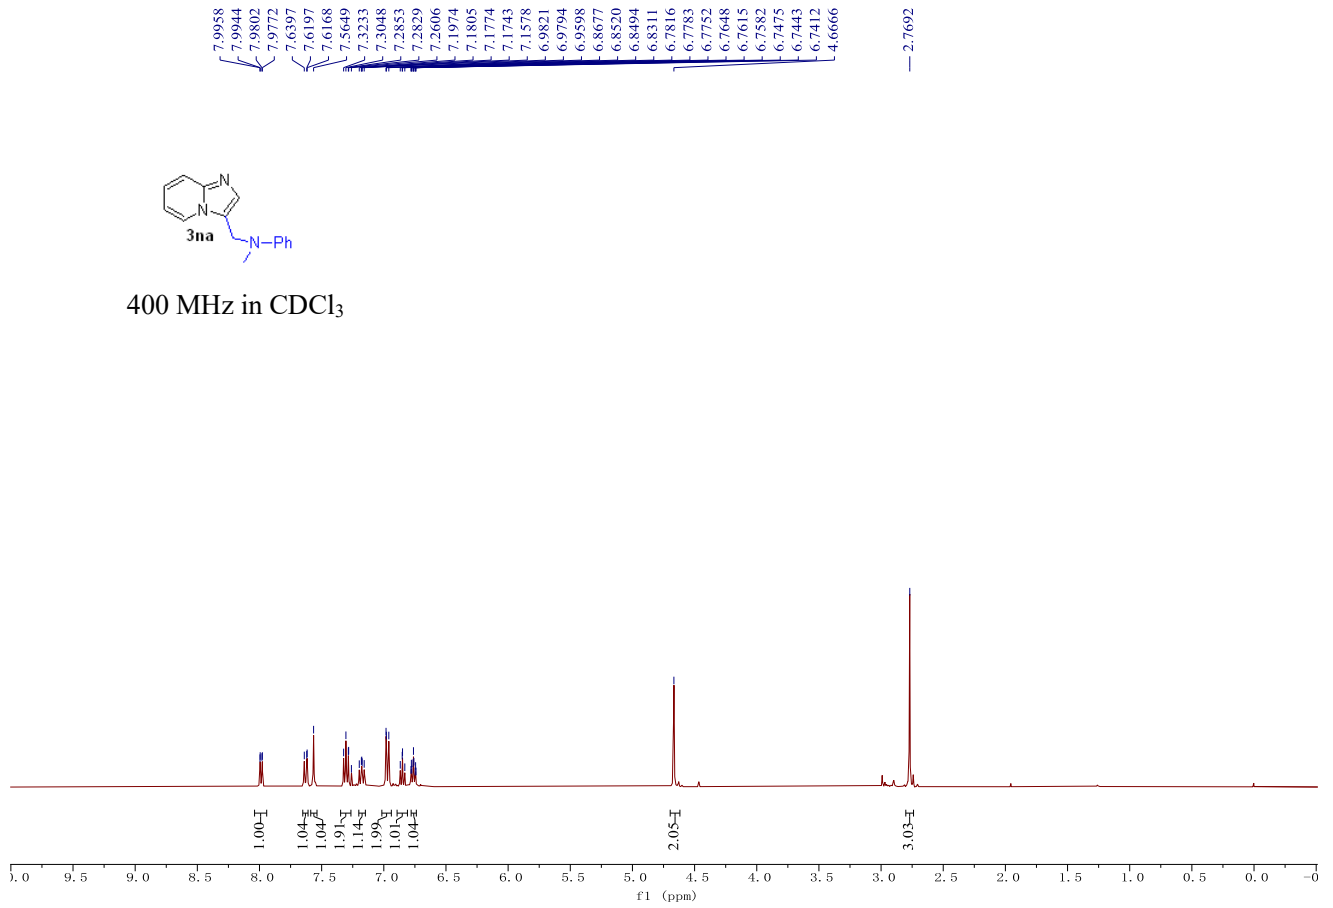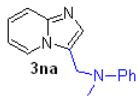

100 MHz in CDCl<sub>3</sub>

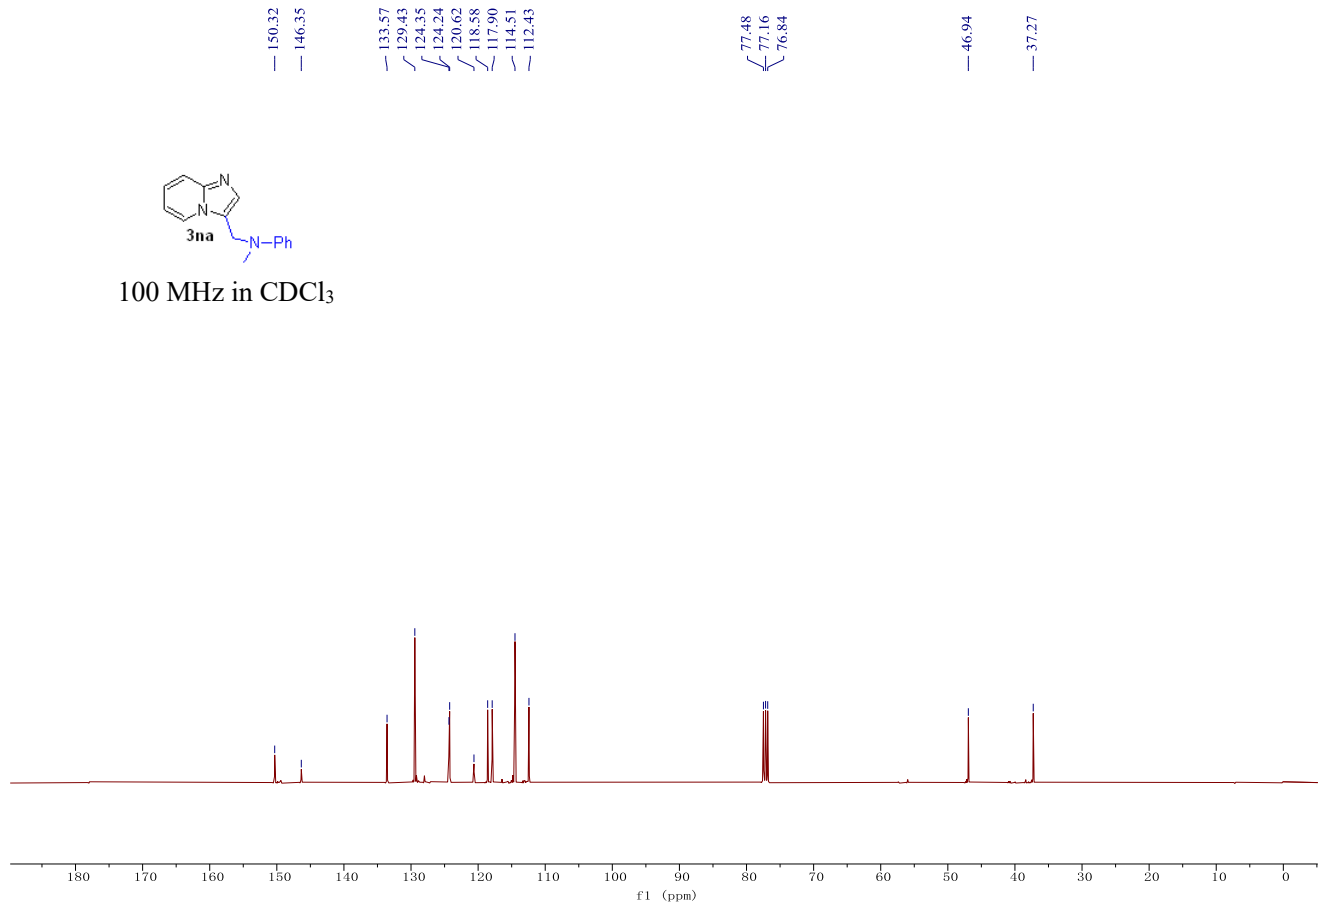

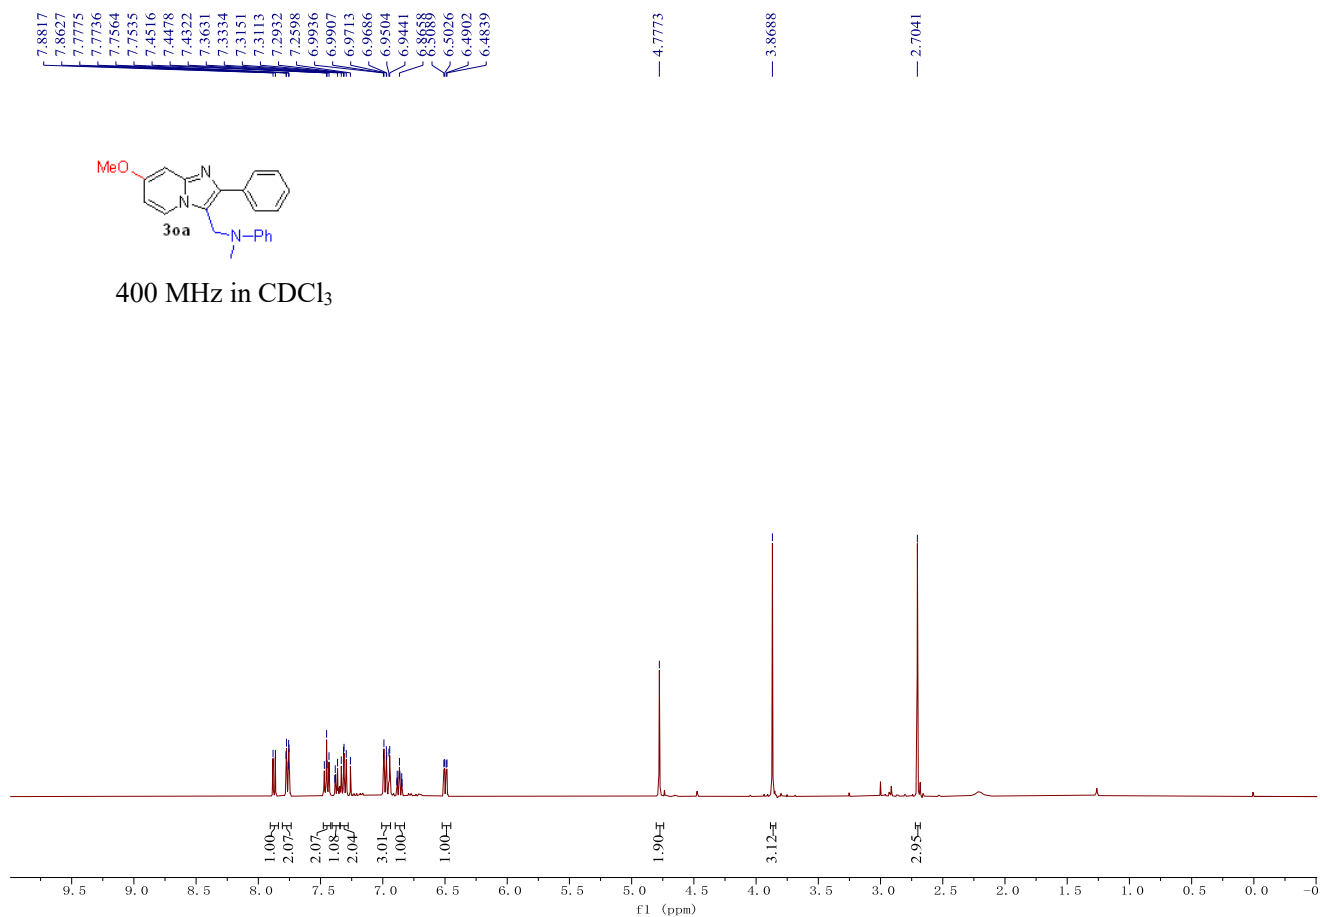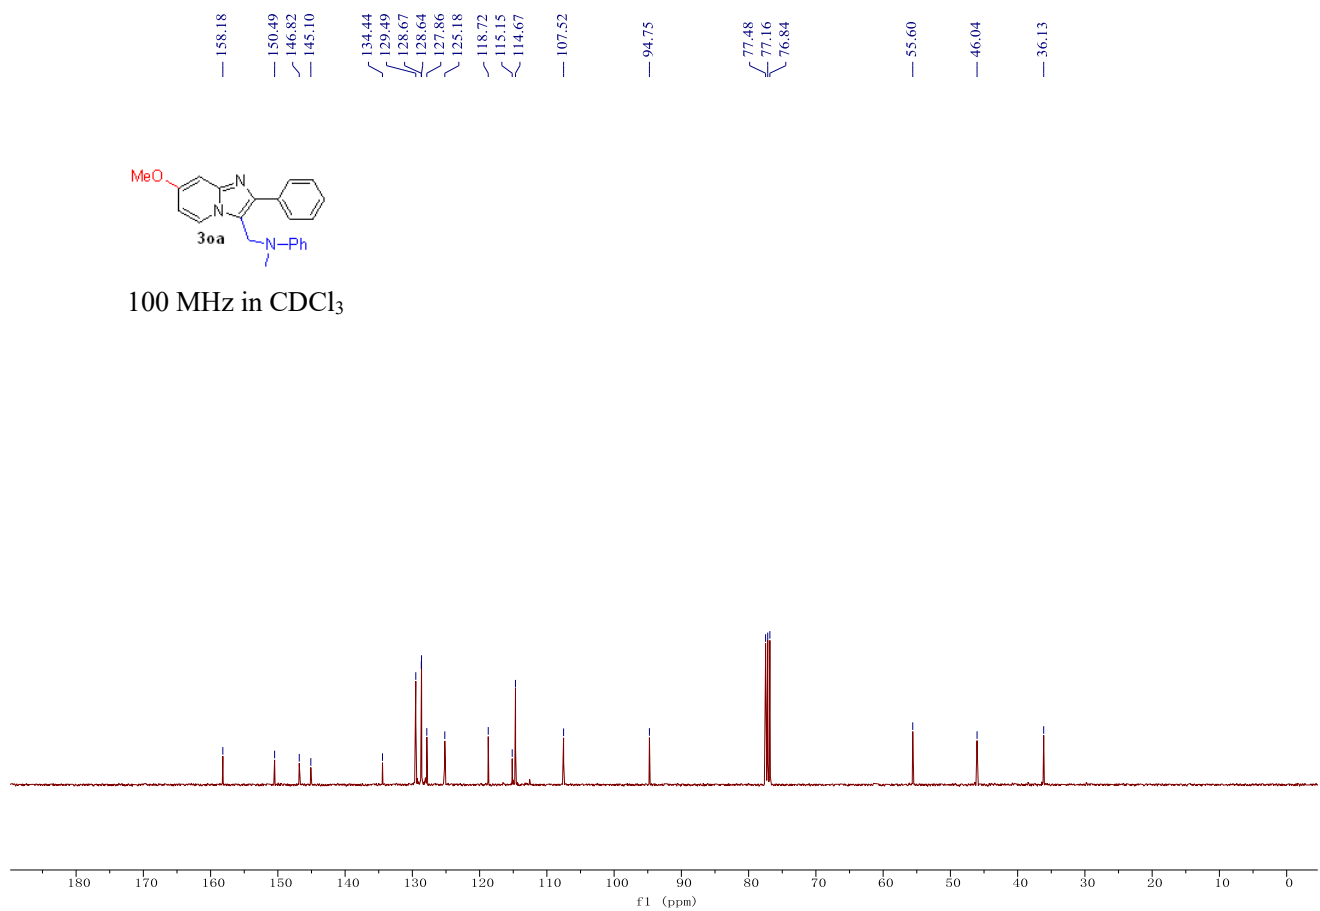



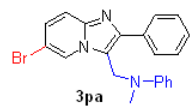

400 MHz in CDCl<sub>3</sub>

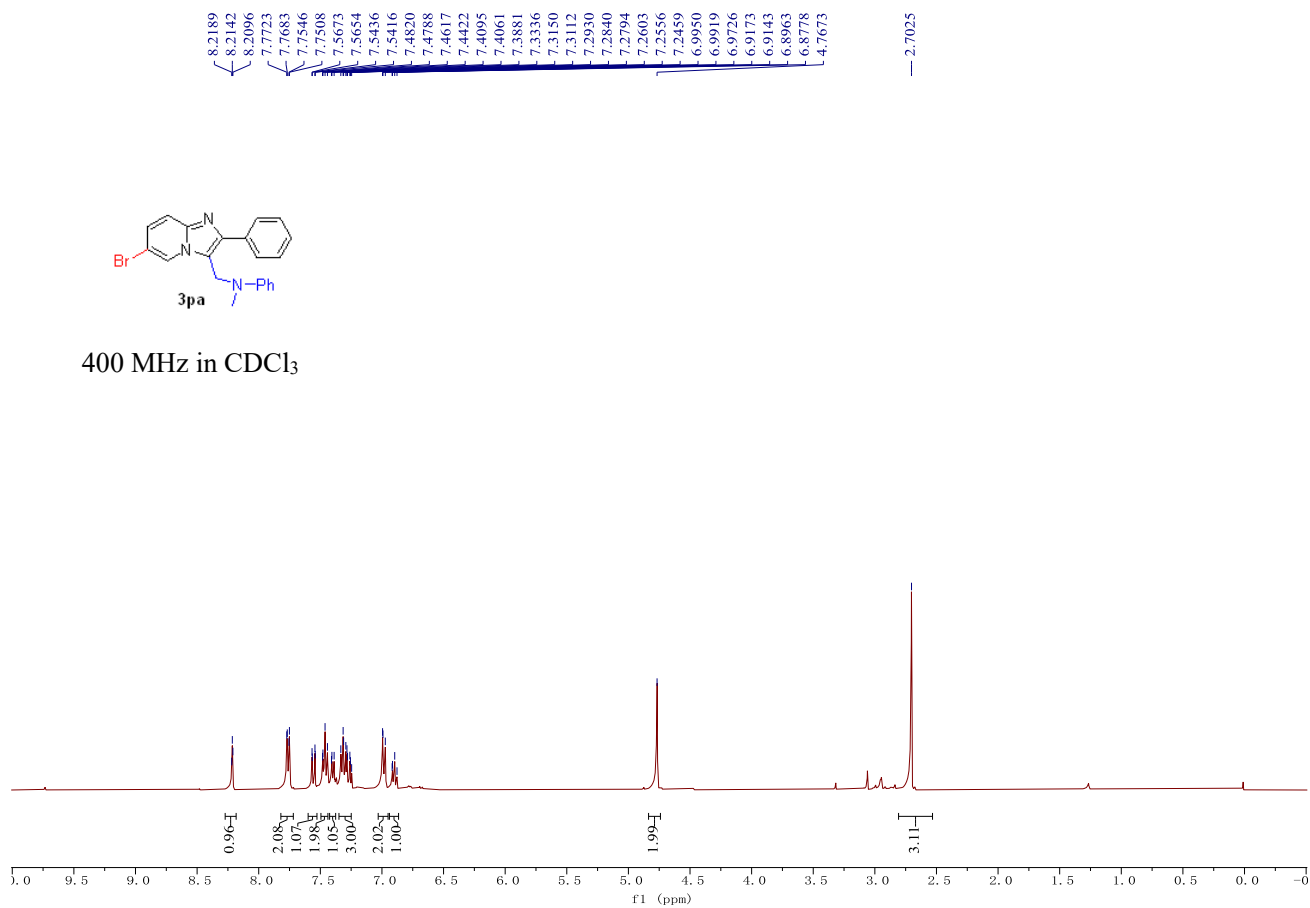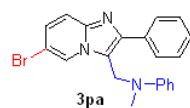

100 MHz in CDCl<sub>3</sub>

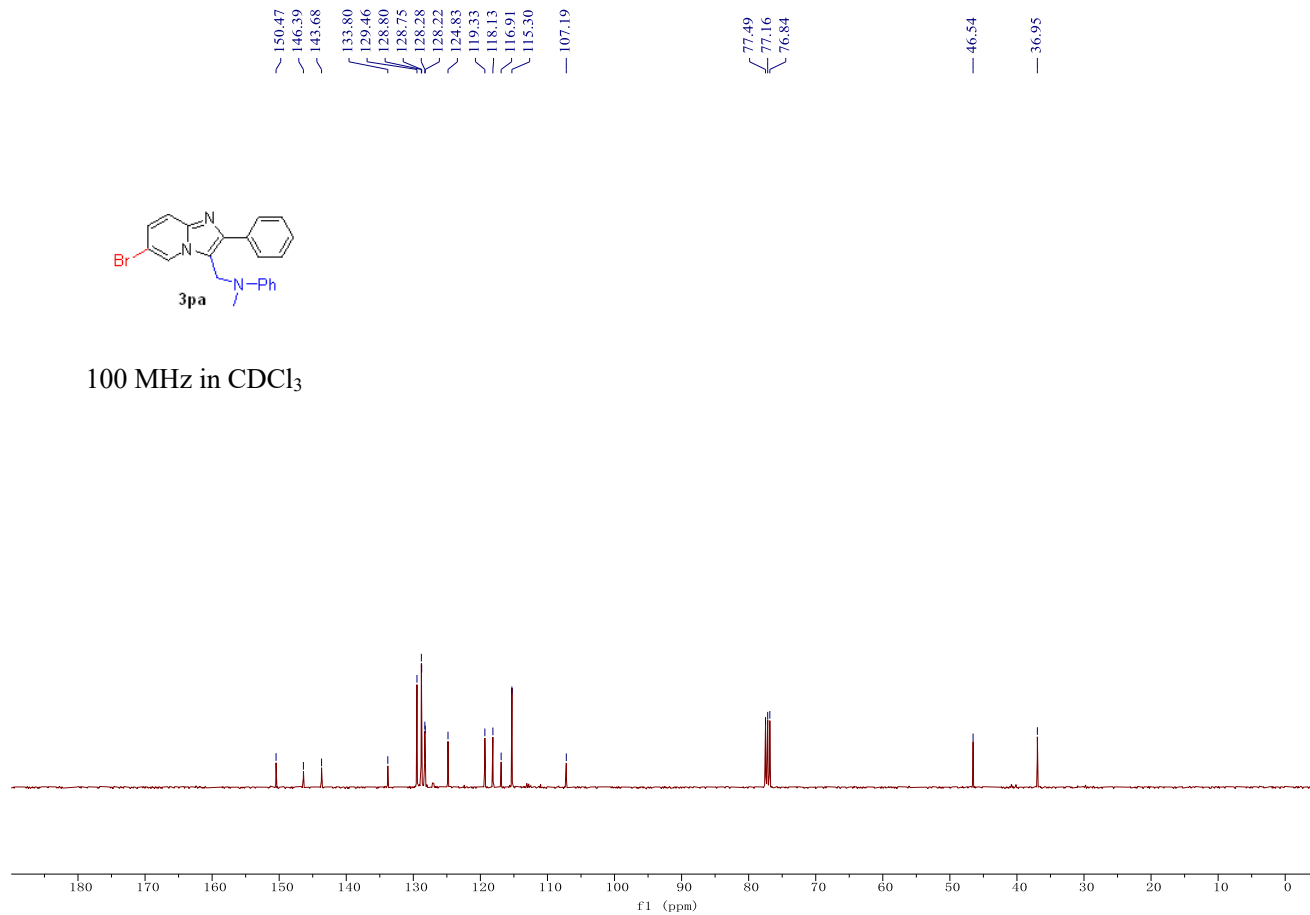

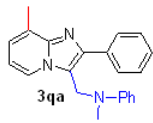

400 MHz in CDCl<sub>3</sub>

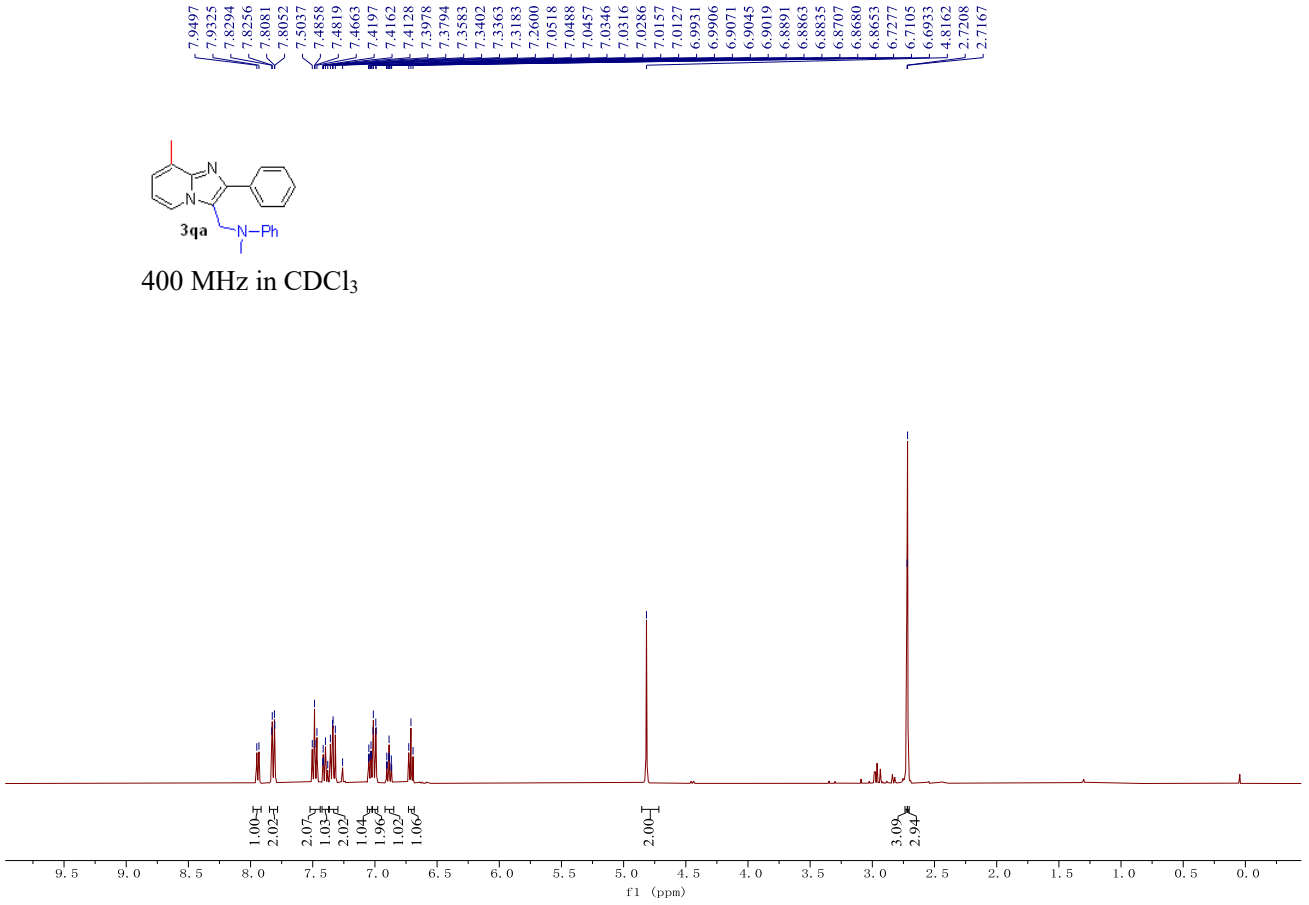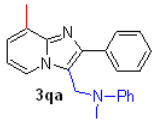

100 MHz in CDCl<sub>3</sub>

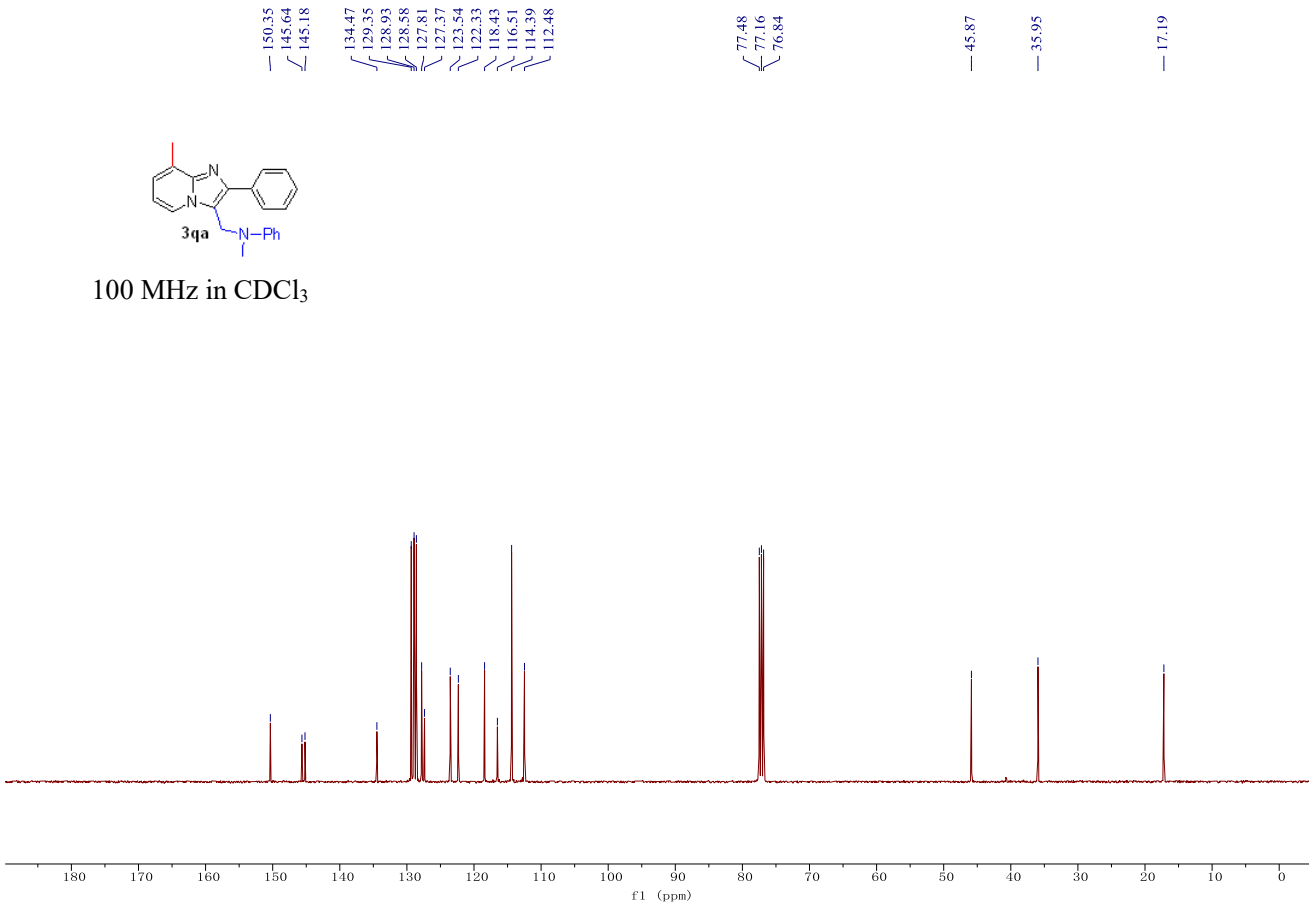

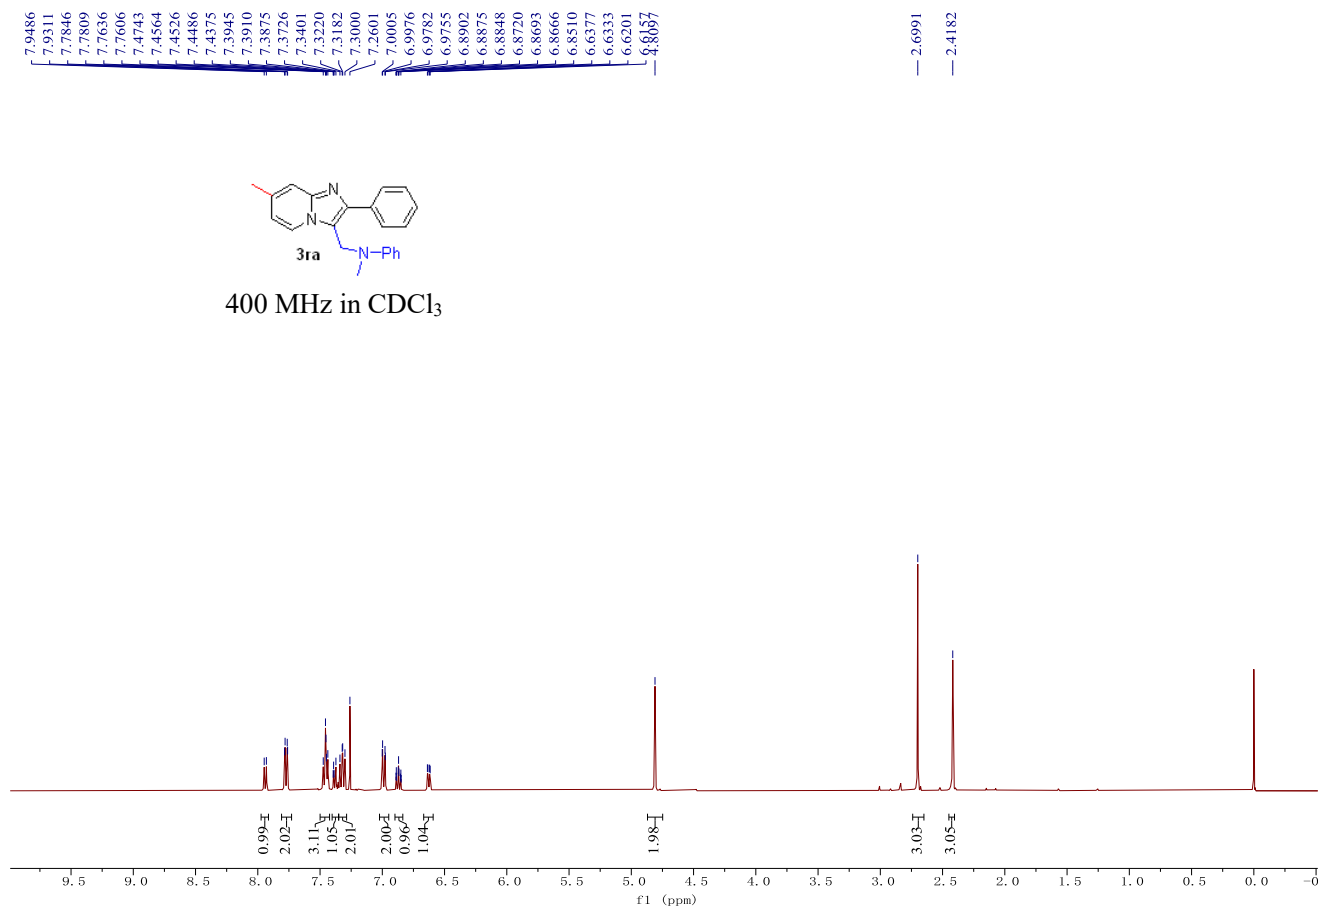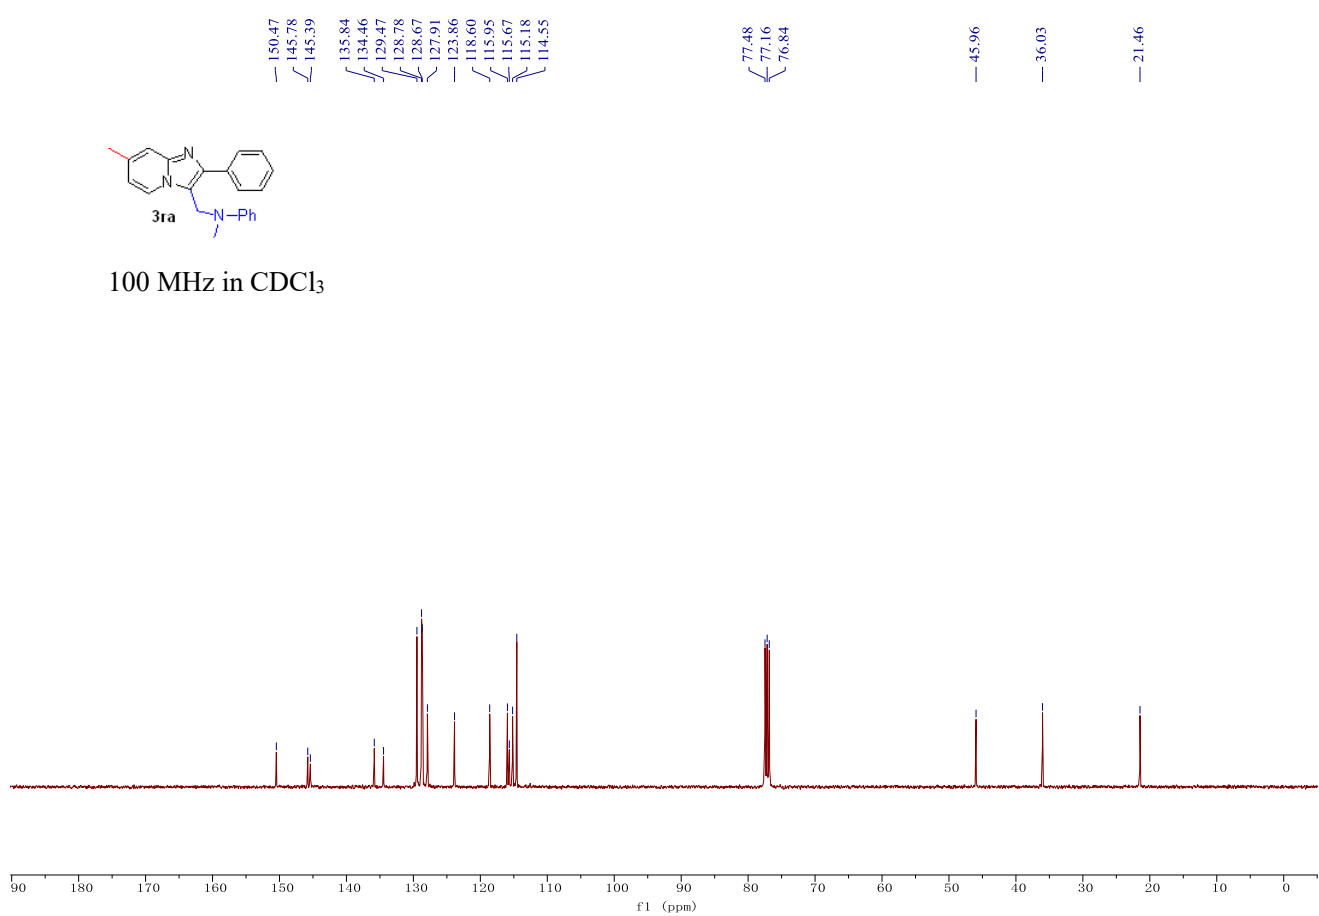

7.8289  
7.8268  
7.8243  
7.7877  
7.7838  
7.7664  
7.7635  
7.6397  
7.6168  
7.4737  
7.4558  
7.4520  
7.4369  
7.4352  
7.3933  
7.3745  
7.3523  
7.3506  
7.3340  
7.3303  
7.3284  
7.3118  
7.2599  
7.1300  
7.1258  
7.1072  
7.1029  
7.0161  
7.0131  
6.9939  
6.9051  
6.9024  
6.9000  
6.8869  
6.8842  
6.8818  
6.8684  
6.8660  
6.8636  
4.7988

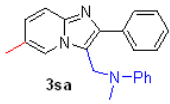

400 MHz in CDCl<sub>3</sub>

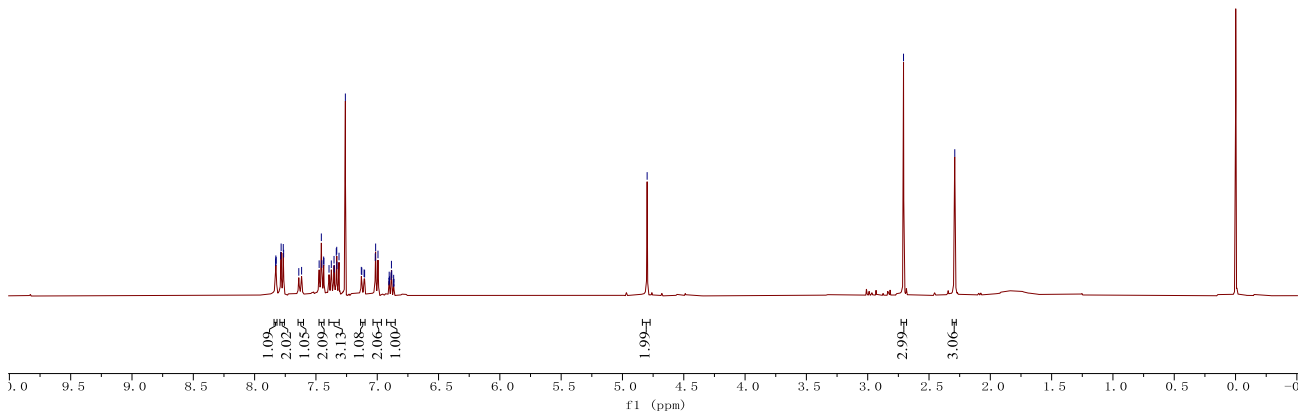

150.52  
145.51  
144.37  
134.41  
129.41  
128.70  
128.64  
128.01  
127.88  
122.18  
118.61  
116.83  
115.93  
114.62  
77.48  
77.16  
76.85  
46.02  
35.98  
18.49

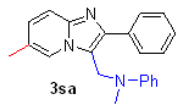

100 MHz in CDCl<sub>3</sub>

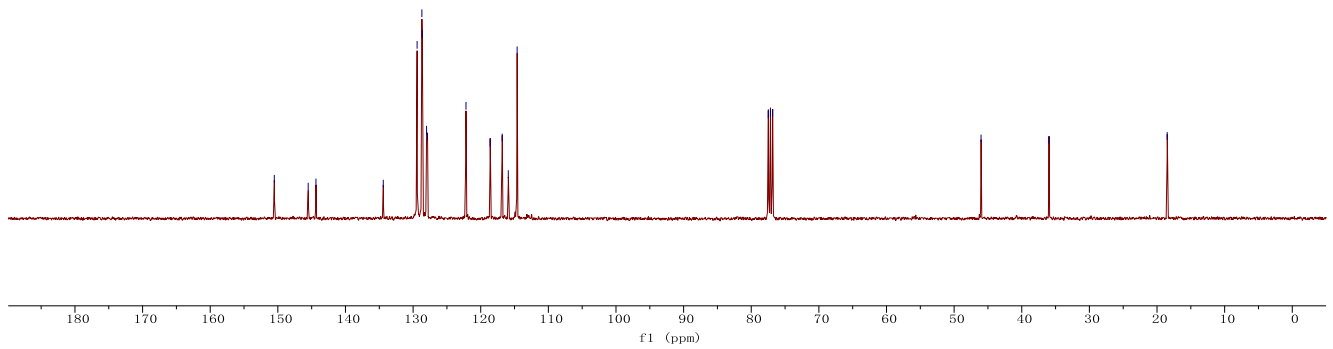

7.6801  
7.6761  
7.6588  
7.6559  
7.5807  
7.5583  
7.4502  
7.4326  
7.4286  
7.4140  
7.3875  
7.3840  
7.3805  
7.3716  
7.3655  
7.3334  
7.3151  
7.3112  
7.2929  
7.2600  
7.1612  
7.1442  
7.1386  
7.1218  
6.8935  
6.8737  
6.8607  
6.8427  
6.8244  
6.5681  
6.5653  
6.5624  
6.5511  
6.5482  
6.5374  
6.5274

— 2.7843  
— 2.6368

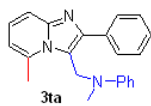

400 MHz in CDCl<sub>3</sub>

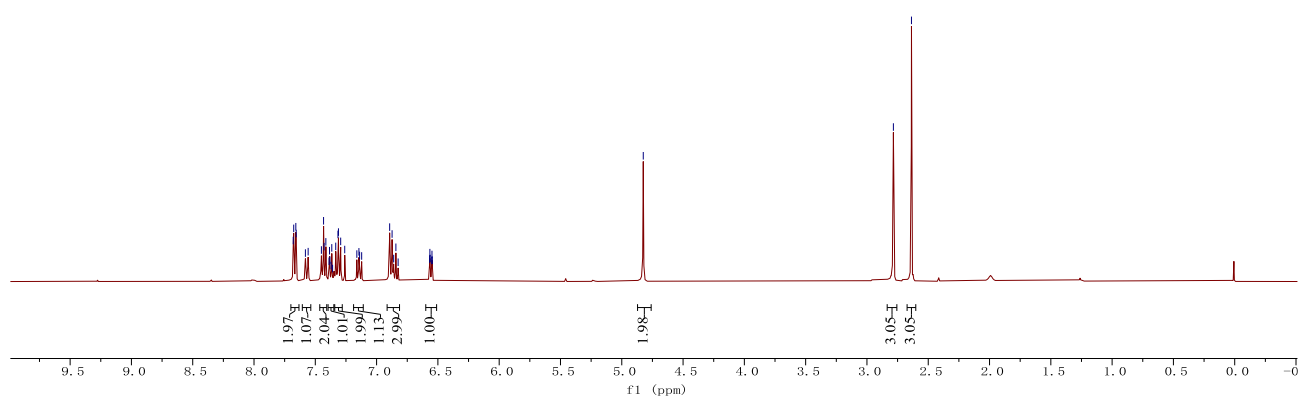

149.29  
148.14  
147.37  
137.09  
134.52  
129.45  
129.26  
128.65  
128.07  
125.47  
118.06  
117.13  
115.89  
113.94  
113.65

77.47  
77.16  
76.84

— 45.43

— 34.78

— 19.28

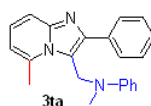

100 MHz in CDCl<sub>3</sub>

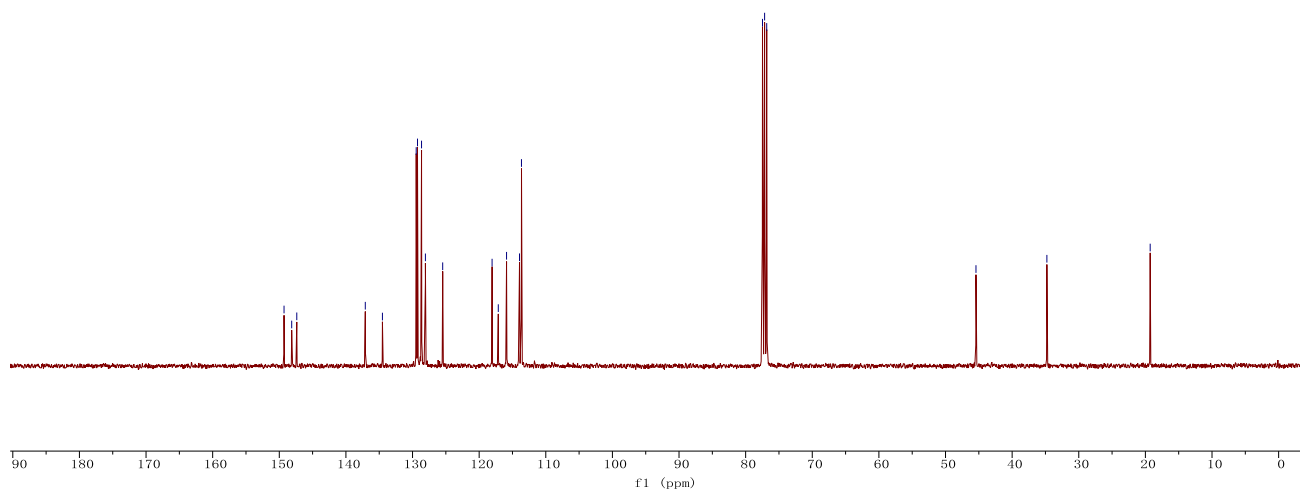

8.5474  
8.5423  
8.5371  
8.5320  
8.3983  
8.3931  
8.3811  
8.3760  
7.8496  
7.8457  
7.8283  
7.8253  
7.4856  
7.4678  
7.4659  
7.4489  
7.4470  
7.4169  
7.4133  
7.4098  
7.3950  
7.3766  
7.3221  
7.3039  
7.3001  
7.2818  
7.2600  
6.9834  
6.9807  
6.9781  
6.9611  
6.9585  
6.9055  
6.9028  
6.9003  
6.8873  
6.8848  
6.8845  
6.8819  
6.8689  
6.8663  
6.8636  
6.8240  
6.8136  
6.8068  
6.7965  
4.8438  
2.6876

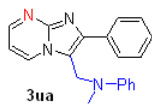

400 MHz in CDCl<sub>3</sub>

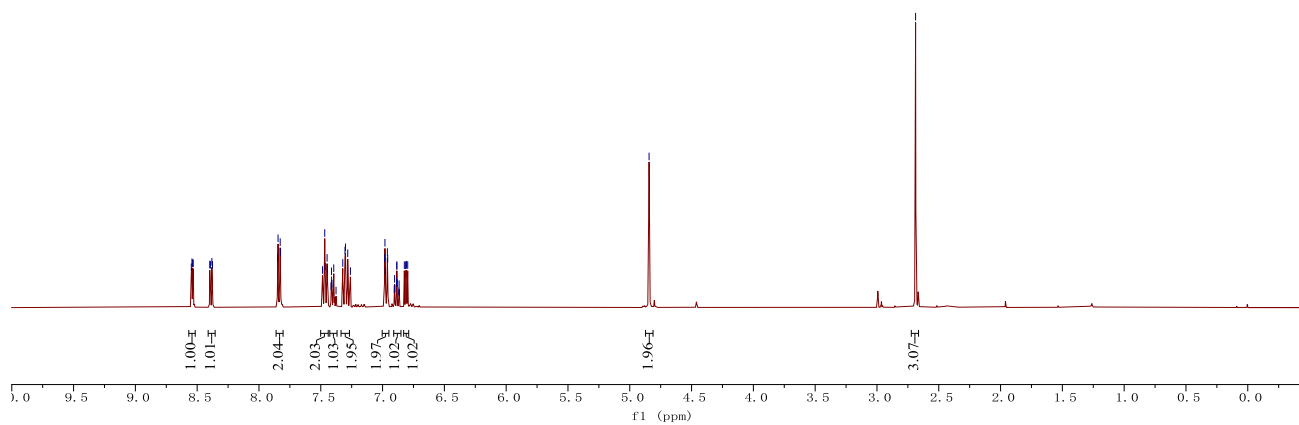

150.27  
149.93  
148.30  
146.82  
133.59  
132.56  
129.53  
129.00  
128.71  
128.46  
119.32  
115.11  
115.08  
108.69  
77.48  
77.16  
76.84  
46.43  
37.00

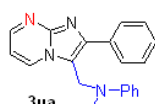

100 MHz in CDCl<sub>3</sub>

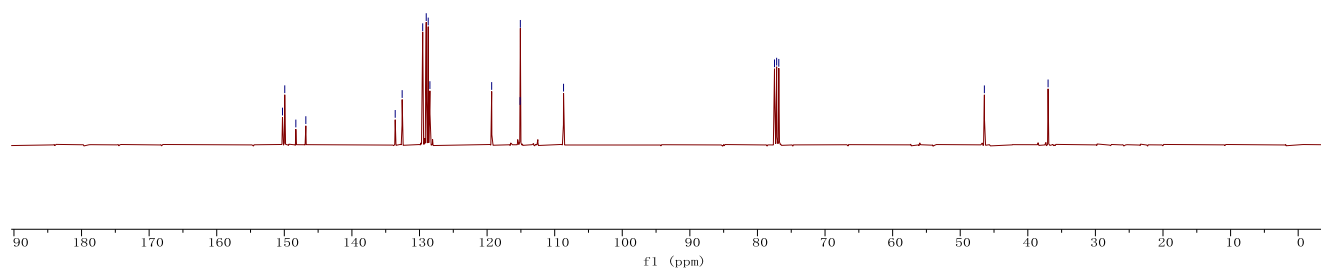

8.4489  
8.4459  
8.4428  
8.4317  
8.4386  
8.4255  
7.8140  
7.8103  
7.7928  
7.7899  
7.6374  
7.6345  
7.6315  
7.6147  
7.6118  
7.6088  
7.4648  
7.4466  
7.4430  
7.4271  
7.3744  
7.3710  
7.3677  
7.3525  
7.3342  
7.2600  
7.2126  
7.2095  
7.1959  
7.1927  
7.1900  
7.1867  
7.1734  
7.1700  
6.8073  
6.8043  
6.7902  
6.7871  
6.7732  
6.7702  
3.9402

2.3973  
2.3793  
2.3611  
2.1691  
1.4931  
1.4764  
1.4592  
1.4413  
1.2379  
1.2379  
1.2006  
0.8901  
0.8738  
0.8561

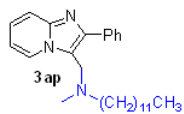

400 MHz in CDCl<sub>3</sub>

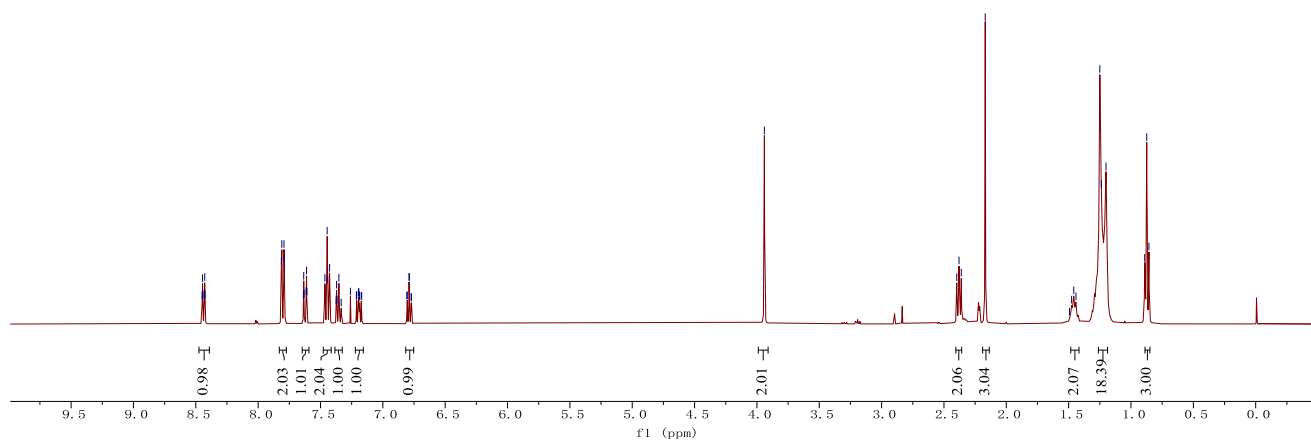

145.05  
144.85  
134.79  
129.02  
128.48  
127.69  
125.69  
124.49  
117.59  
117.23  
111.73

77.48  
77.16  
76.84

57.20  
51.77

41.68  
32.03  
29.78  
29.75  
29.72  
29.57  
29.46  
27.41  
27.33  
22.80  
14.24

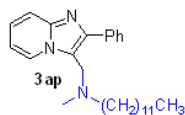

100 MHz in CDCl<sub>3</sub>

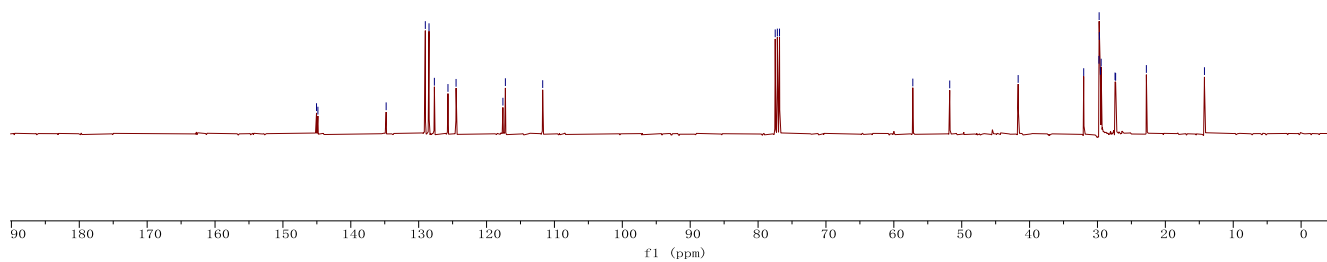





8.4256  
8.4076  
7.7951  
7.7909  
7.7732  
7.6952  
7.6717  
7.4786  
7.4613  
7.4418  
7.4029  
7.3848  
7.3661  
7.3054  
7.2696  
7.2607  
7.2493  
7.2319  
7.1334  
7.1149  
7.0959  
6.9858  
6.9674  
6.9521  
6.9441  
6.8090  
6.7920  
6.7750  
6.5807  
6.5653  
5.7803  
4.7570  
4.7248  
4.2008  
4.1950  
4.1390  
4.1325  
4.1190  
4.1124  
4.1076  
4.1012  
4.0877  
4.0813  
3.8478  
3.8422  
3.8326  
3.8269  
3.8165  
3.8110  
3.8013  
3.7958  
3.6504  
3.6184  
2.8842  
2.8786  
2.8643  
2.8585  
2.8495  
2.8440  
2.8297  
2.8240  
2.6935  
2.6869  
2.6780  
2.6588  
2.6523  
1.6434

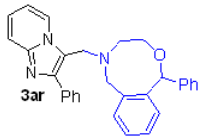

400 MHz in CDCl<sub>3</sub>

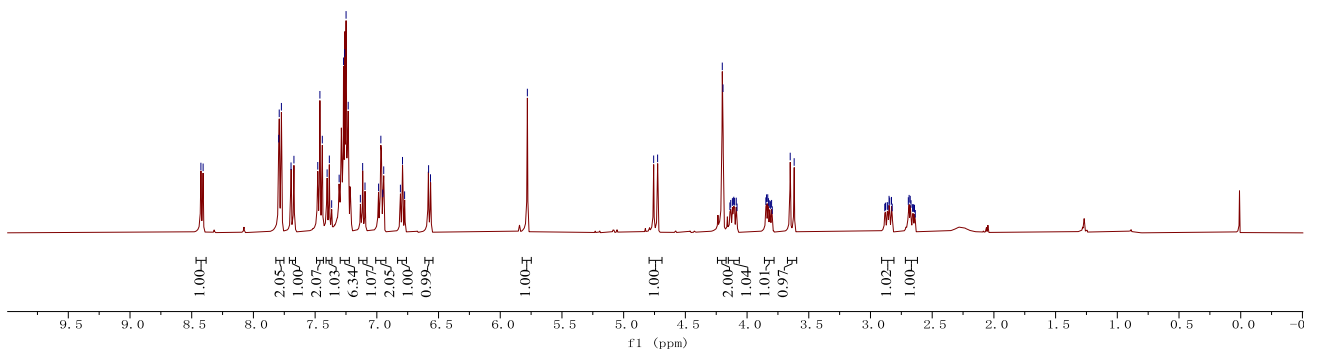

145.26  
142.78  
140.83  
134.62  
132.82  
129.09  
128.65  
128.56  
127.89  
127.68  
127.62  
127.44  
127.35  
125.91  
124.78  
117.28  
117.22  
111.94  
84.37  
77.48  
77.16  
76.85  
68.89  
55.45  
52.35  
49.85

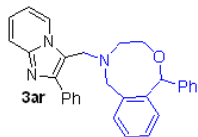

100 MHz in CDCl<sub>3</sub>

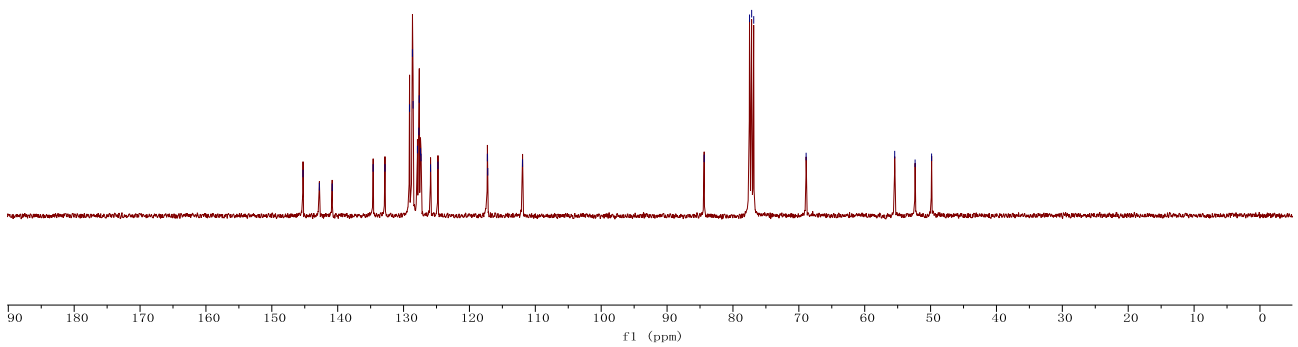

8.4693  
8.4671  
8.4647  
8.4623  
8.4570  
8.4548  
8.4523  
8.4500  
8.0107  
8.0078  
8.0048  
7.9934  
7.9904  
7.9874  
7.7612  
7.7575  
7.7400  
7.7371  
7.7334  
7.5706  
7.5678  
7.5507  
7.5479  
7.5450  
7.4909  
7.4863  
7.4719  
7.4672  
7.4527  
7.4480  
7.4368  
7.4188  
7.4151  
7.3995  
7.3476  
7.3291  
7.2600  
7.1344  
7.1311  
7.1176  
7.1143  
7.1117  
7.1084  
7.0949  
7.0916  
7.0736  
7.0706  
7.0612  
7.0584  
7.0547  
7.0517  
7.0426  
7.0396  
6.9807  
6.9780  
6.9753  
6.9612  
6.9585  
6.9557  
6.5737  
6.5707  
6.5567  
6.5536  
6.5397  
6.5367  
3.9726  
2.9414  
2.9194  
2.8785  
2.8624  
2.2205

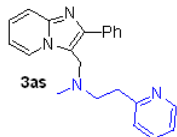

400 MHz in CDCl<sub>3</sub>

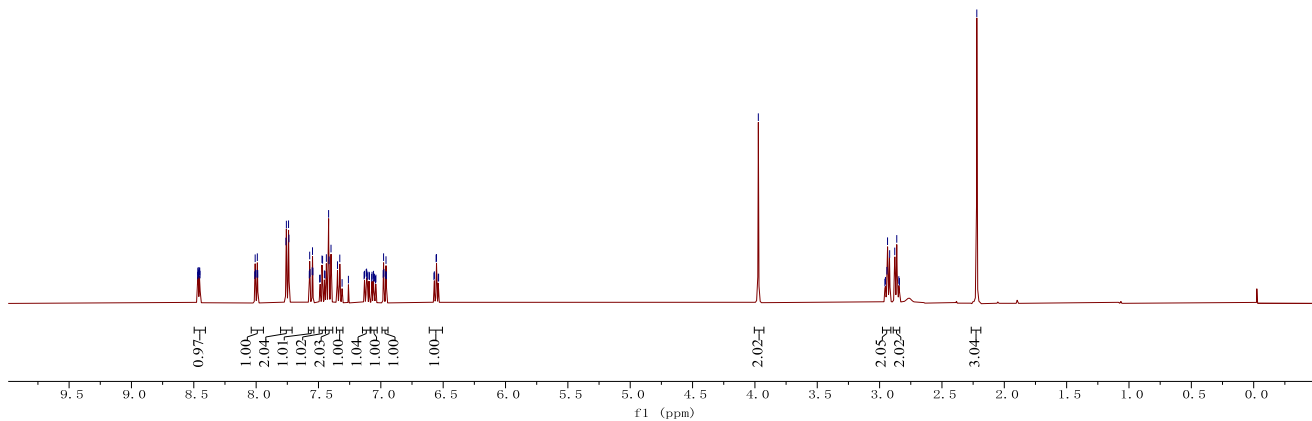

160.39  
149.19  
144.97  
144.71  
136.26  
134.63  
128.94  
128.47  
127.68  
125.68  
124.46  
123.23  
121.21  
117.16  
116.98  
111.54  
77.48  
77.16  
76.84  
56.91  
51.58  
41.23  
35.99

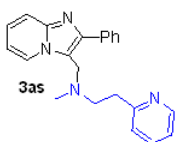

100 MHz in CDCl<sub>3</sub>

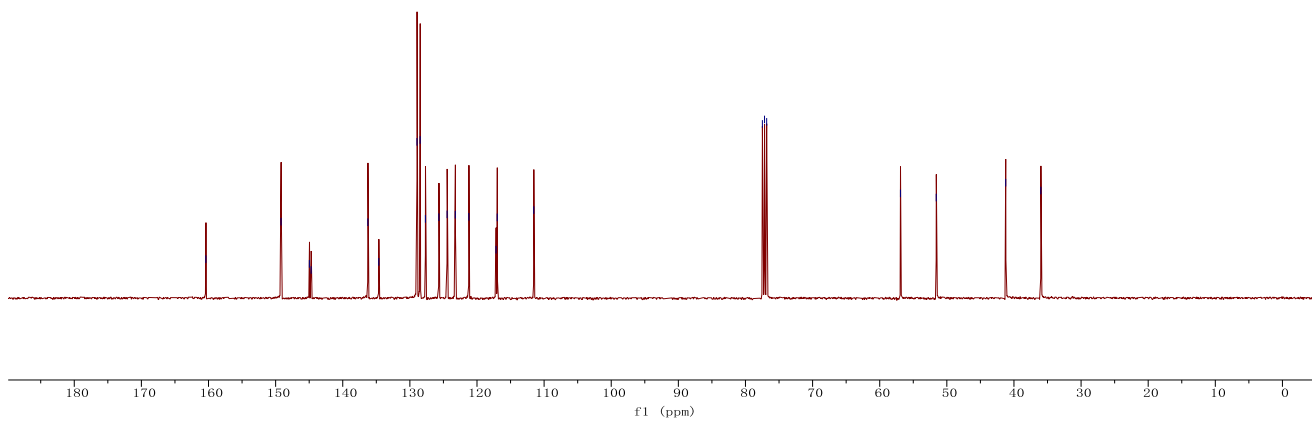

8.1300  
8.1127  
8.0188  
7.7084  
7.6856  
7.3477  
7.3291  
7.3094  
7.2953  
7.2600  
7.0078  
7.0072  
6.9860  
6.9275  
6.9109  
6.8935  
6.8909  
6.8667  
6.8496  
6.8324  
— 4.8290  
— 3.0934  
— 2.7109

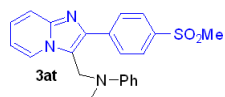

400 MHz in CDCl<sub>3</sub>

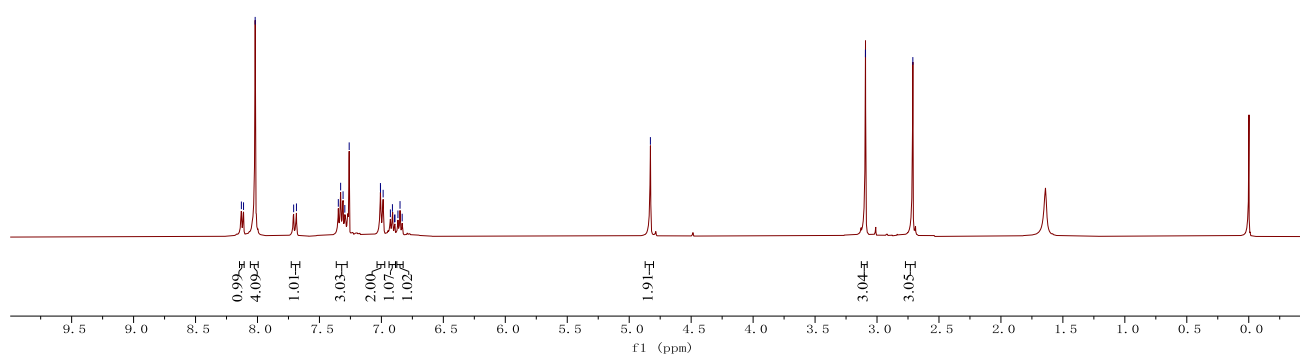

150.18  
145.49  
145.31  
139.91  
139.45  
129.48  
129.41  
127.69  
125.55  
124.72  
119.29  
117.71  
115.02  
113.06  
77.48  
77.16  
76.84  
46.20  
44.57  
36.61

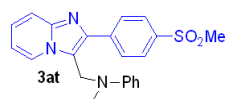

100 MHz in CDCl<sub>3</sub>

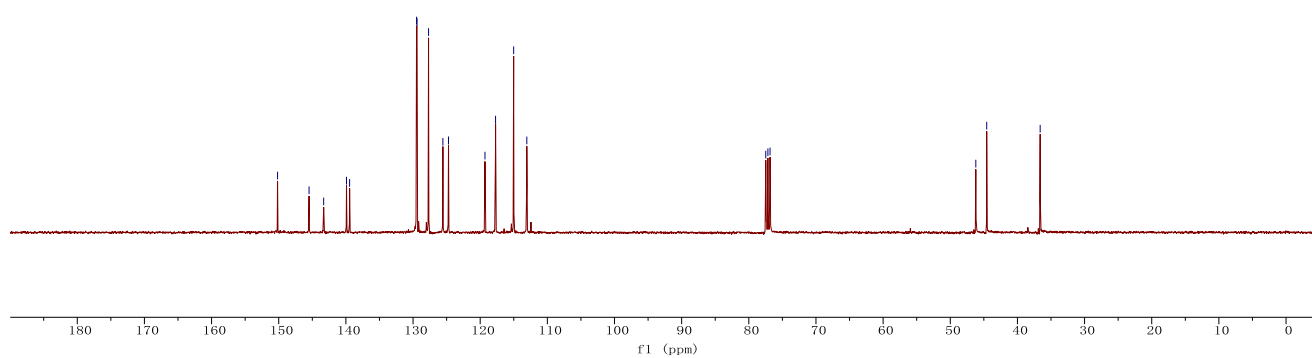

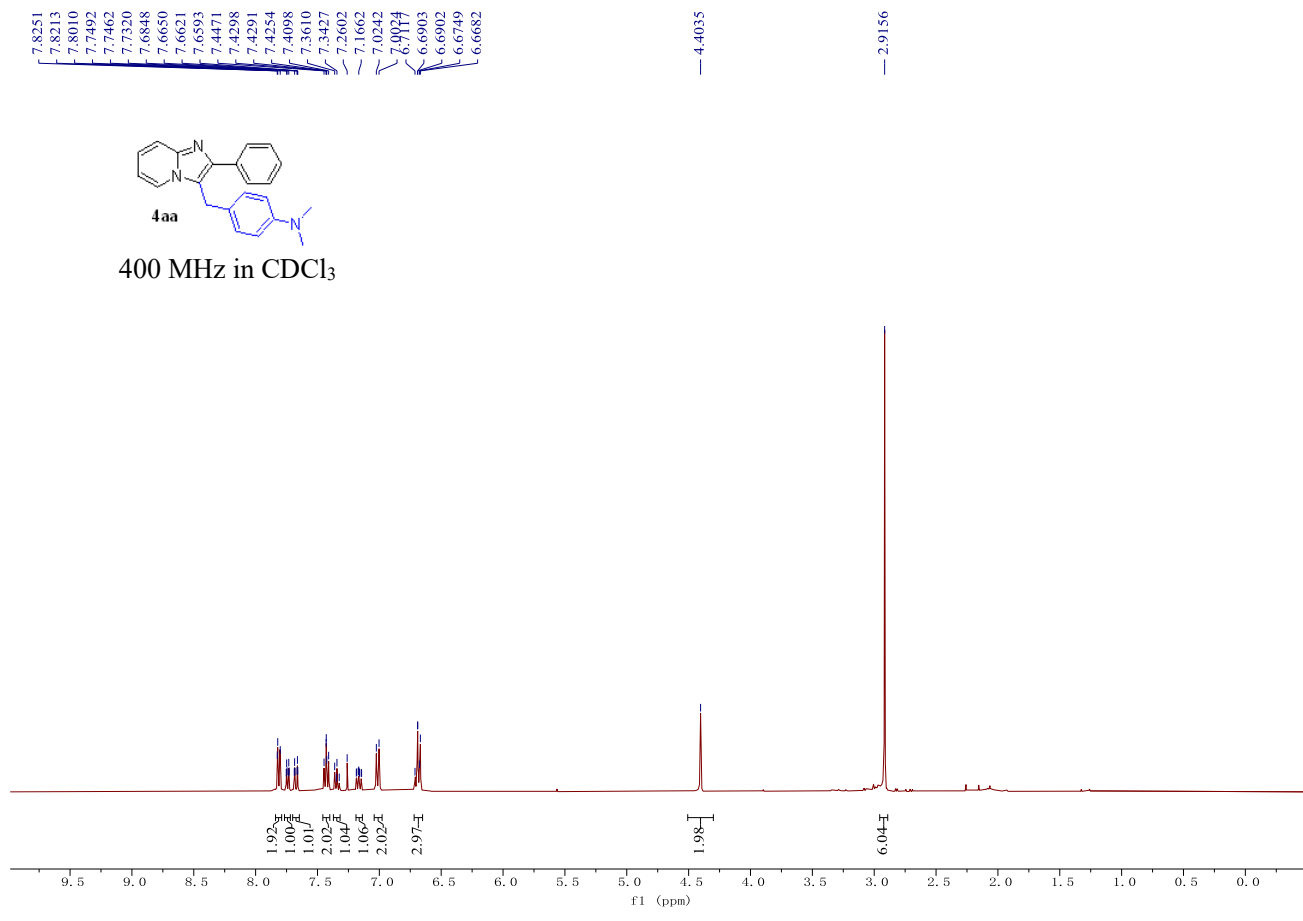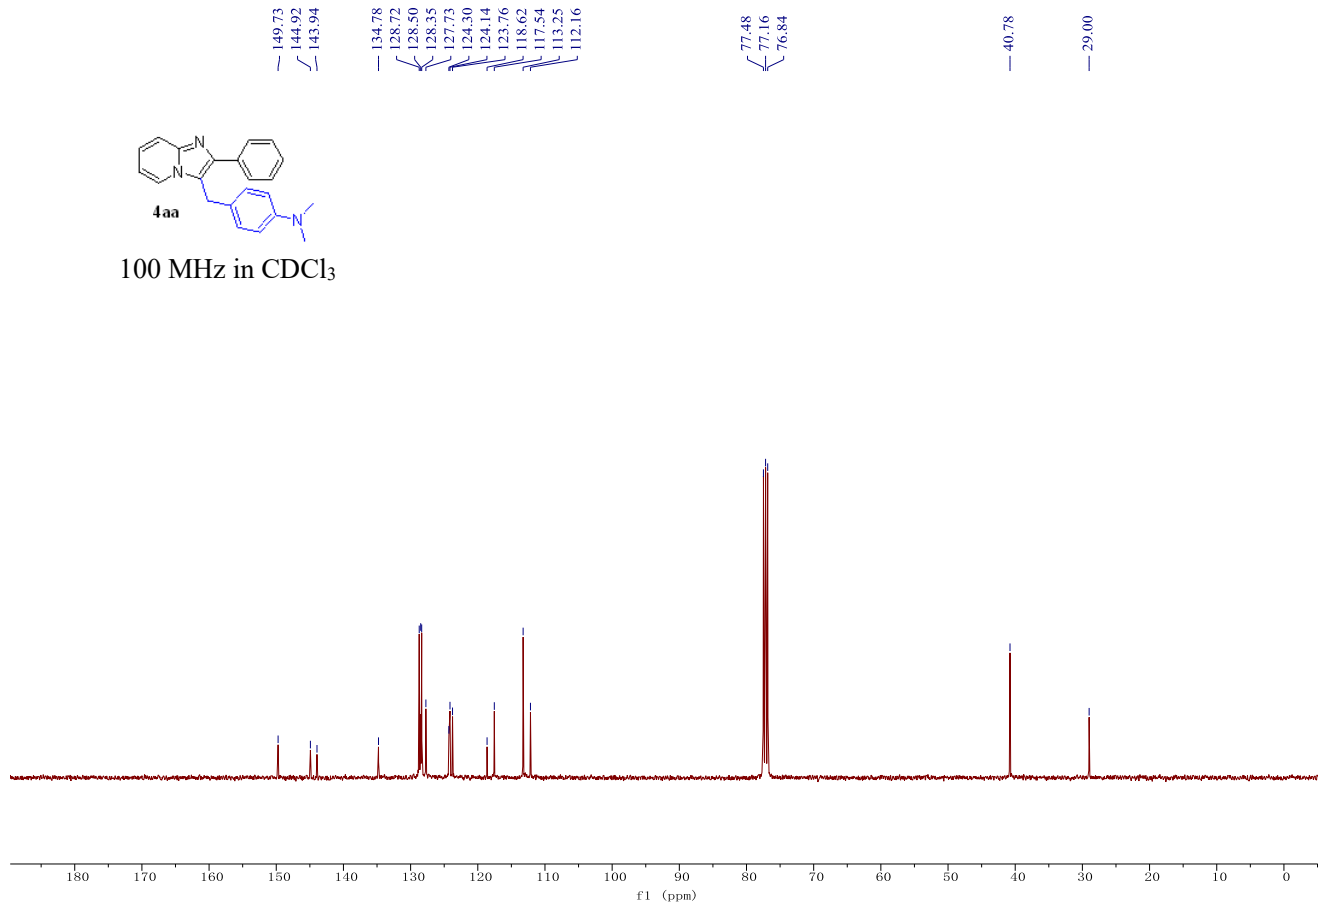

7.7681  
7.7644  
7.7470  
7.7440  
7.7129  
7.7100  
7.6903  
7.6874  
7.6679  
7.6649  
7.6508  
7.6478  
7.4322  
7.4143  
7.3954  
7.3937  
7.3505  
7.3321  
7.2601  
7.1843  
7.1813  
6.7183  
6.7012  
6.6913  
6.6875  
6.5525  
6.5313  
6.4281  
6.4212  
6.4069  
6.4000

4.2843

2.9121

2.4096

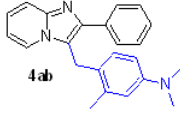

400 MHz in CDCl<sub>3</sub>

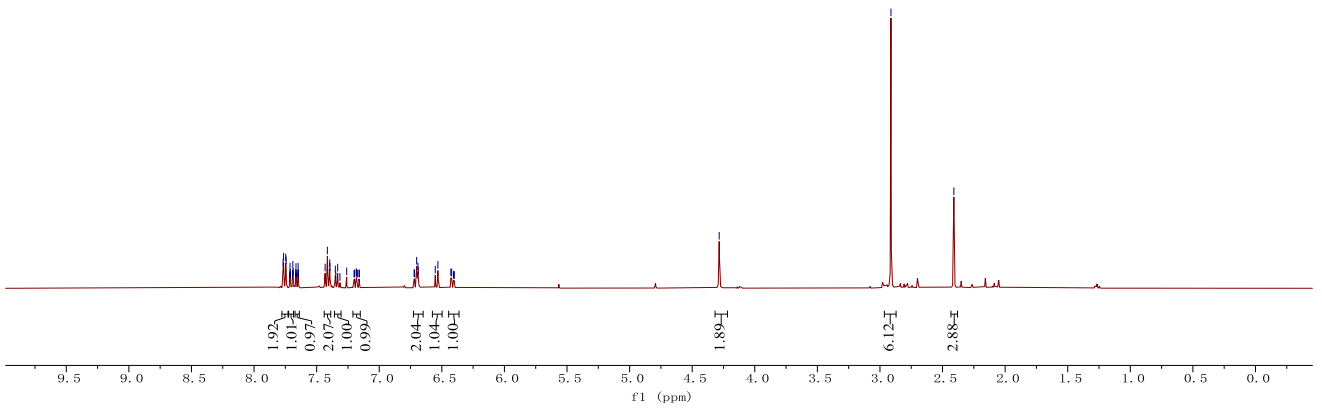

149.73  
144.94  
144.16  
137.03  
134.73  
128.68  
128.24  
127.65  
127.57  
124.08  
123.67  
122.40  
118.30  
117.52  
115.06  
112.17  
110.66

77.48  
77.16  
76.84

40.73

26.83

20.40

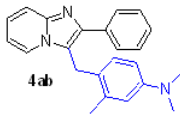

100 MHz in CDCl<sub>3</sub>

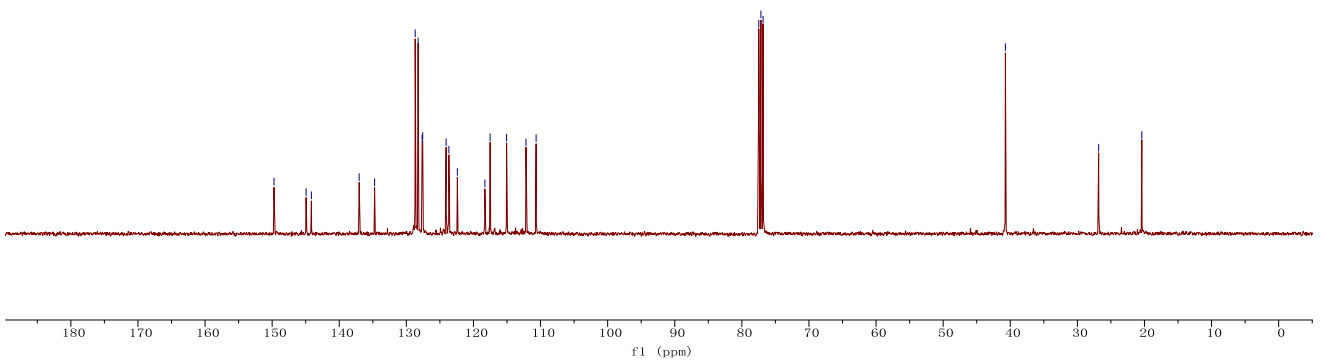

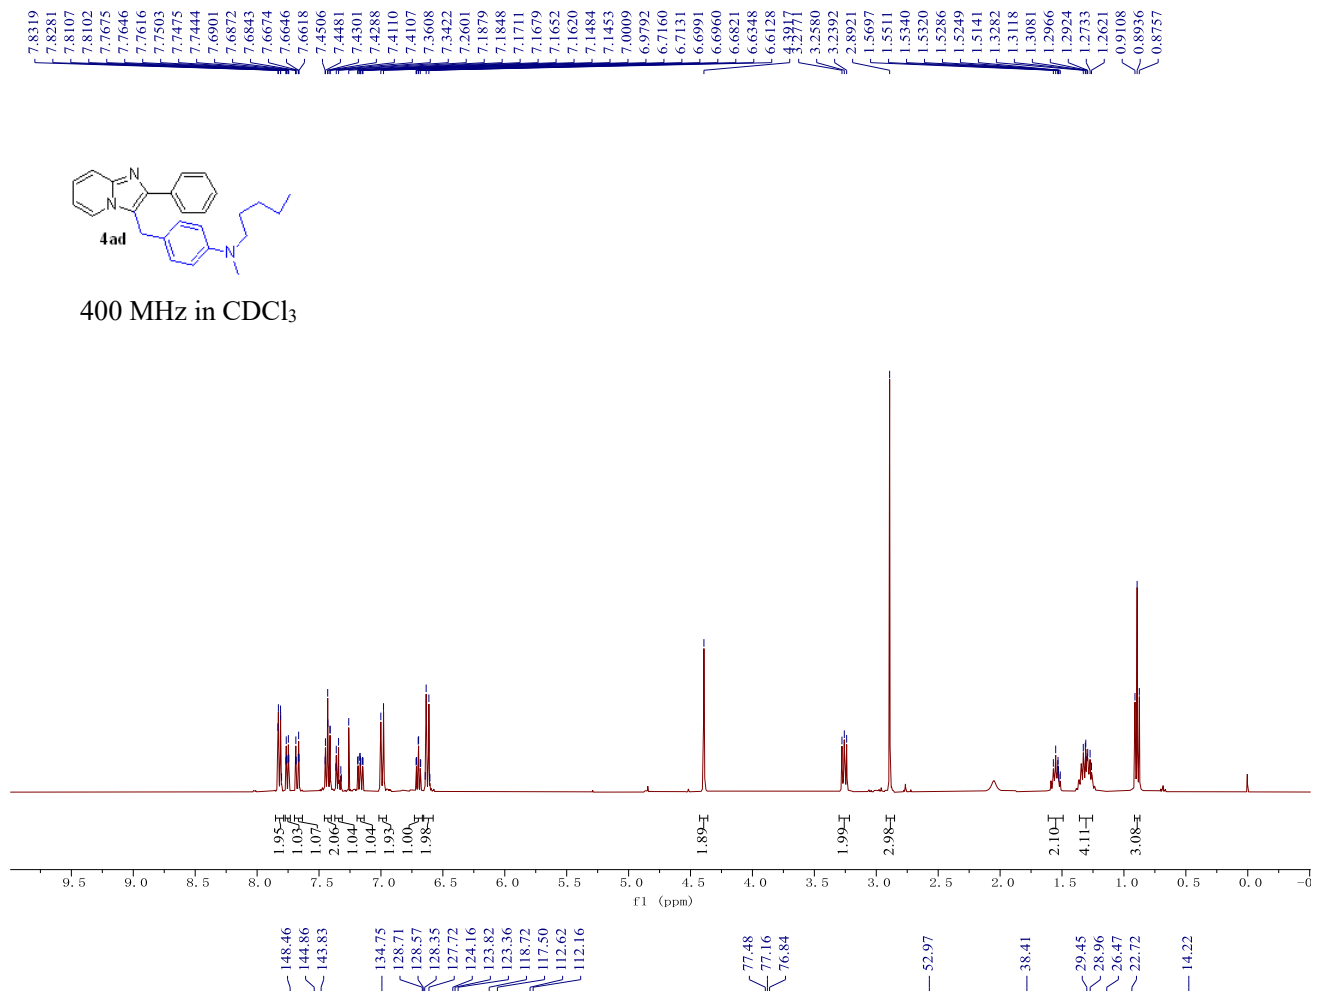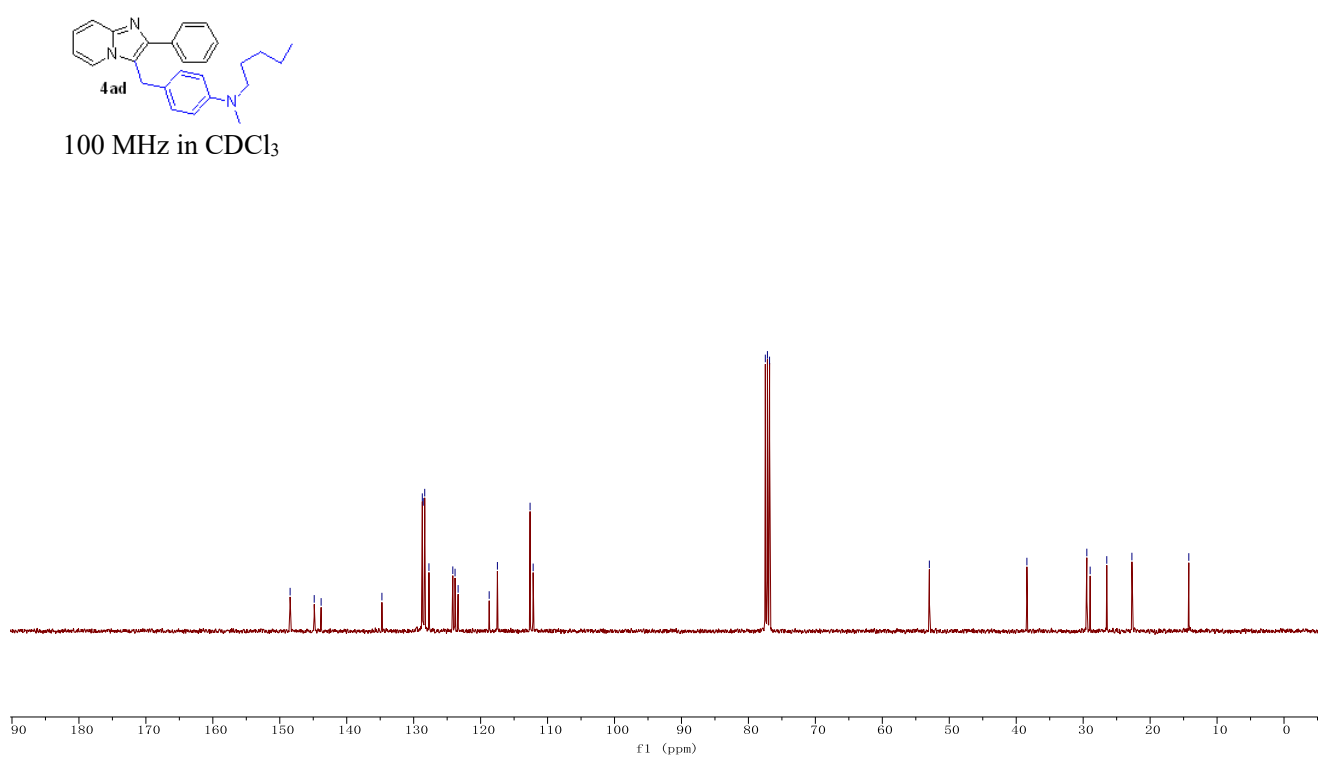

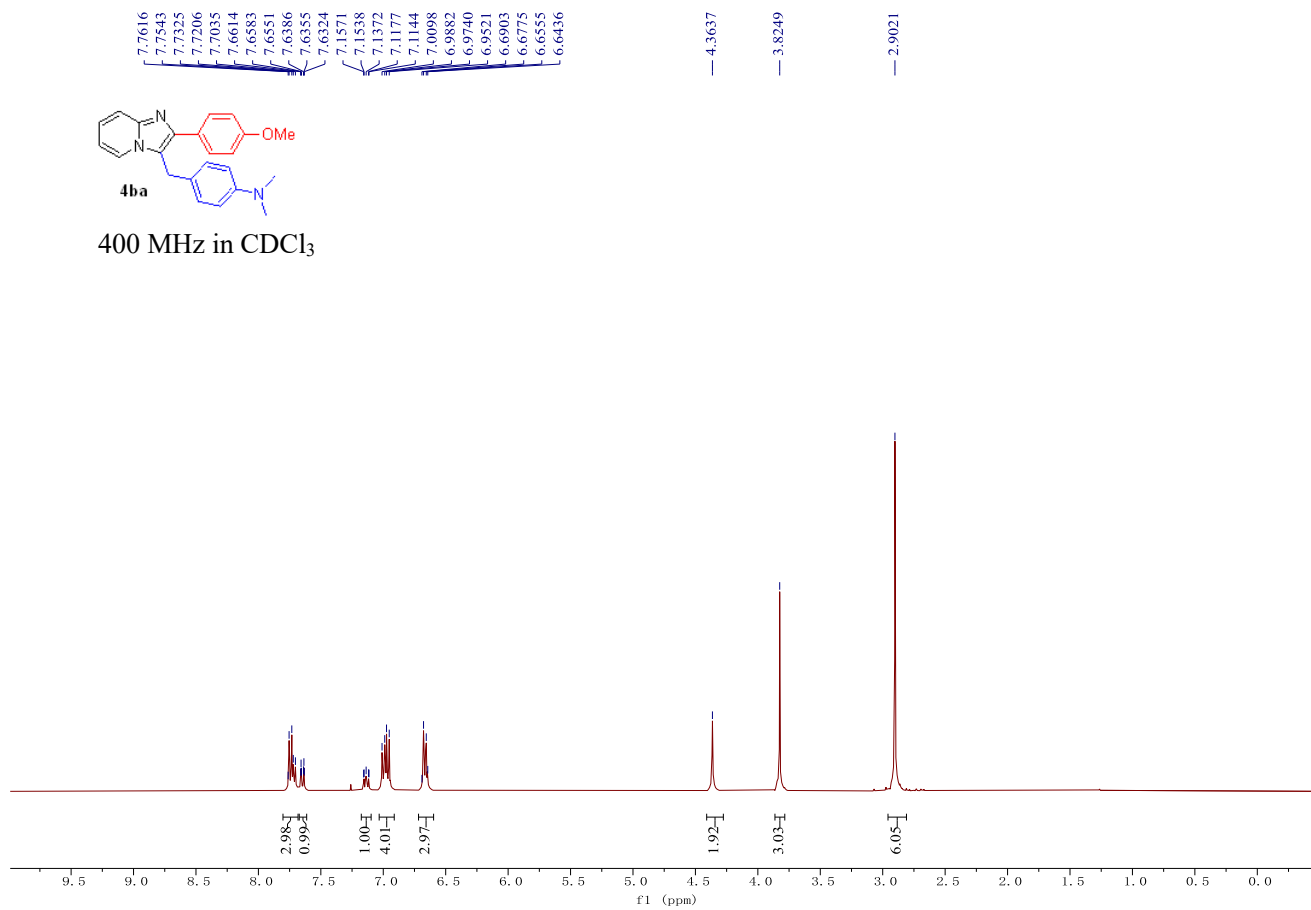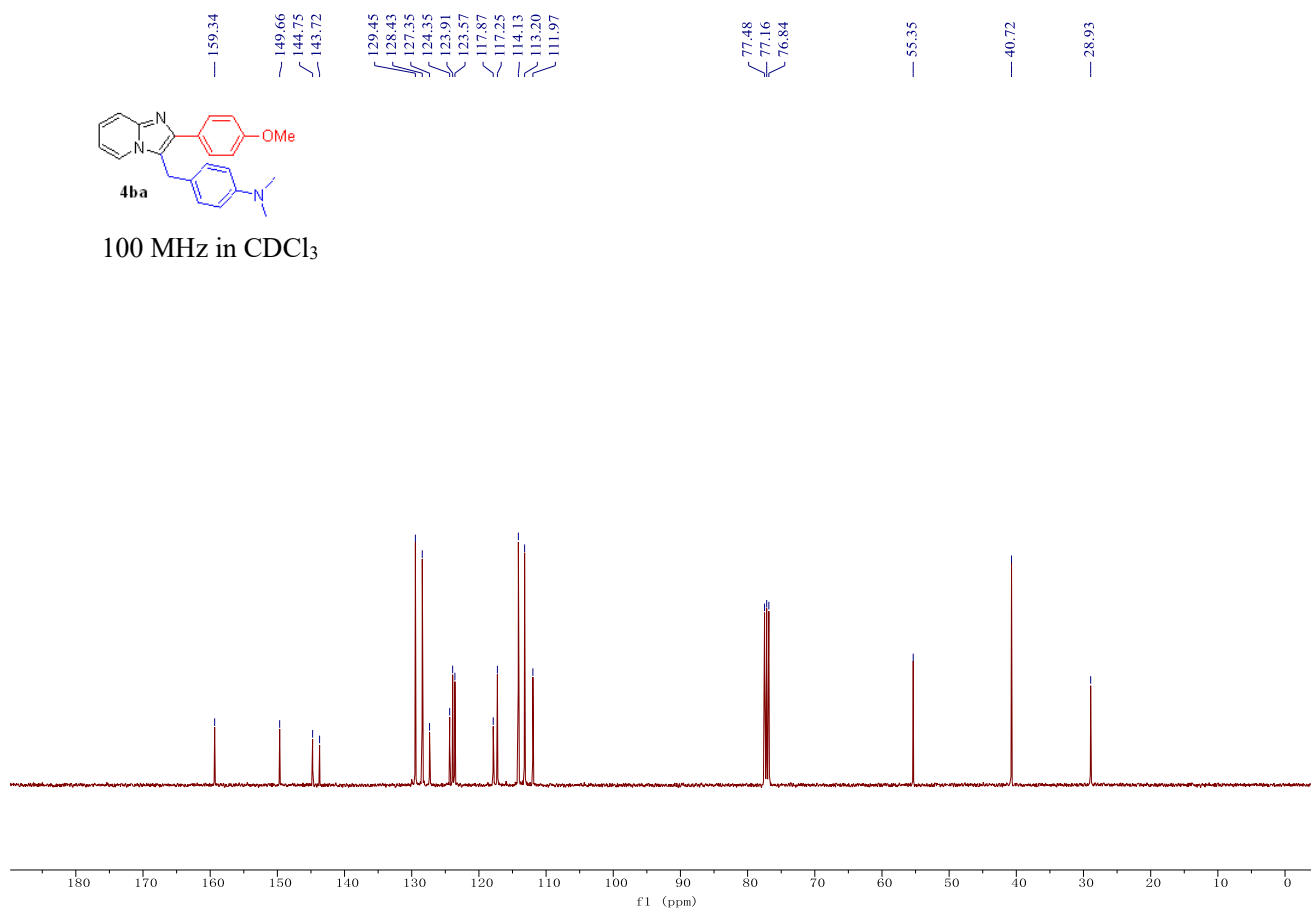

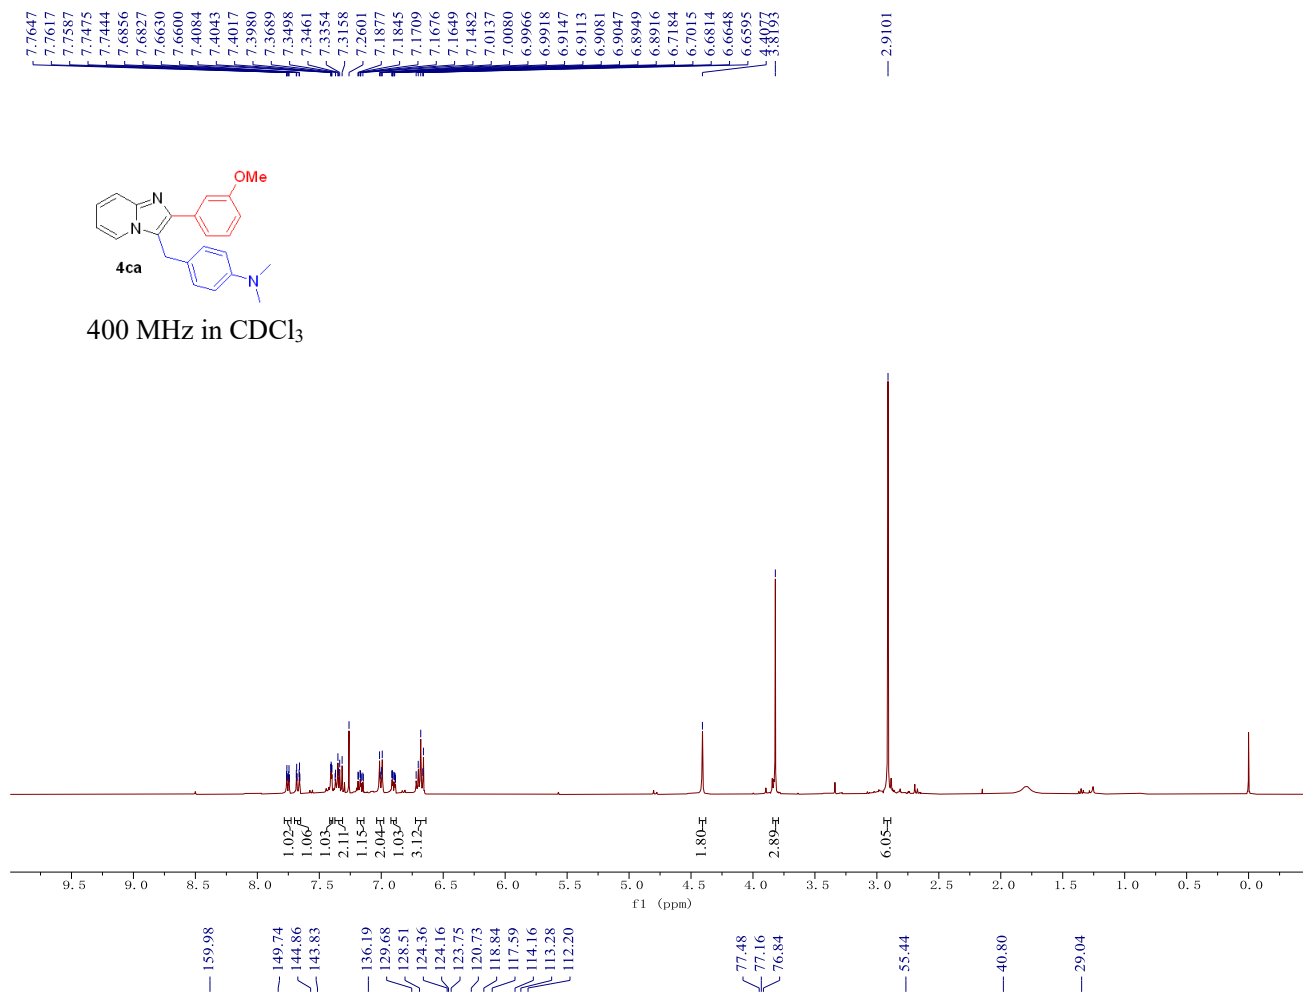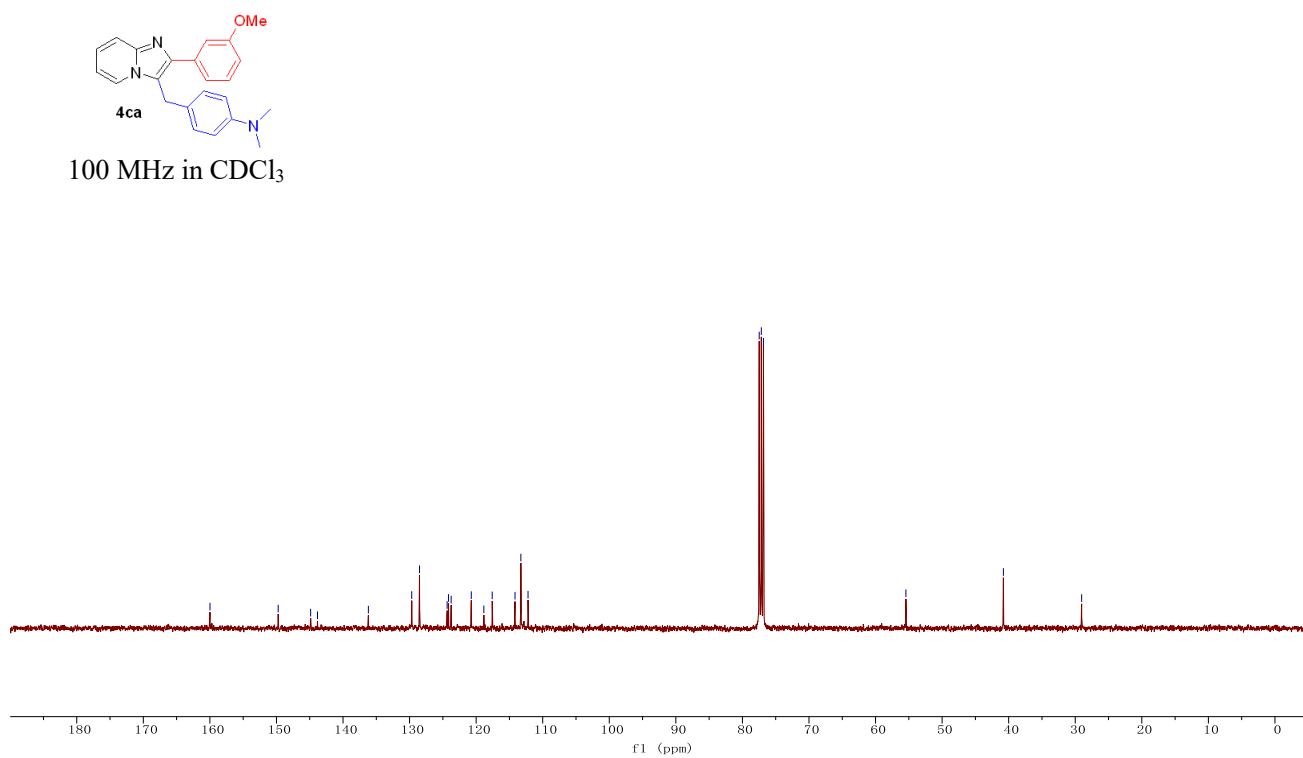



7.7315  
7.7235  
7.7042  
7.7031  
7.6975  
7.6772  
7.6546  
7.2590  
7.2495  
7.2476  
7.2286  
7.1670  
7.1504  
7.1469  
7.1277  
7.0206  
6.9990  
6.6841  
6.6738  
6.6705  
6.6623

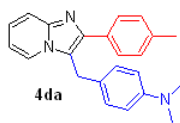

400 MHz in CDCl<sub>3</sub>

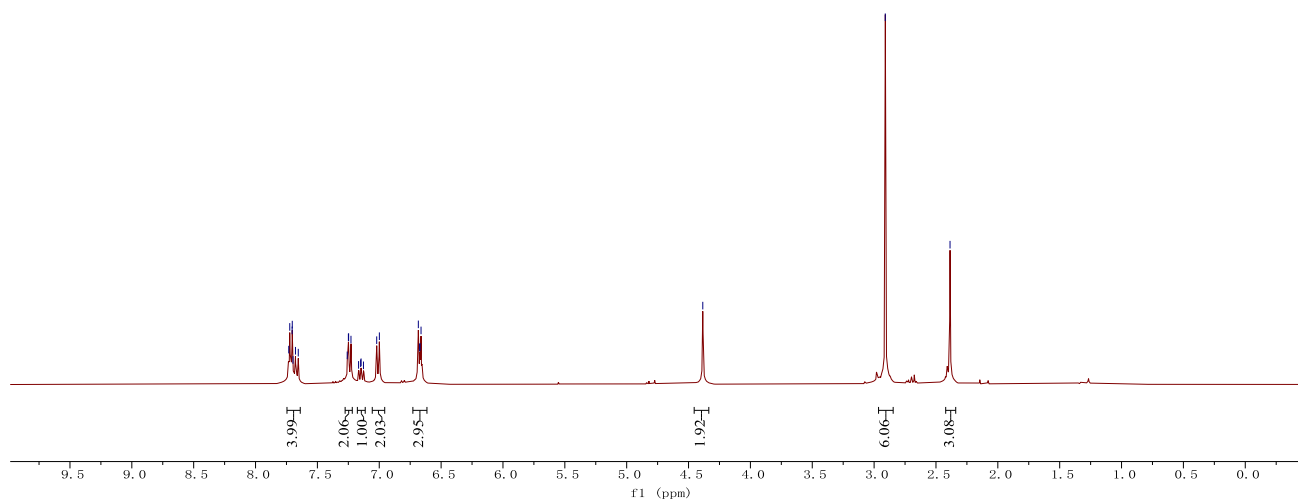

— 4.3849  
— 2.9098  
— 2.3863

149.68  
144.81  
143.93  
137.45  
131.85  
129.41  
128.48  
128.18  
124.38  
123.98  
123.65  
118.31  
117.39  
113.21  
112.03

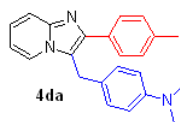

100 MHz in CDCl<sub>3</sub>

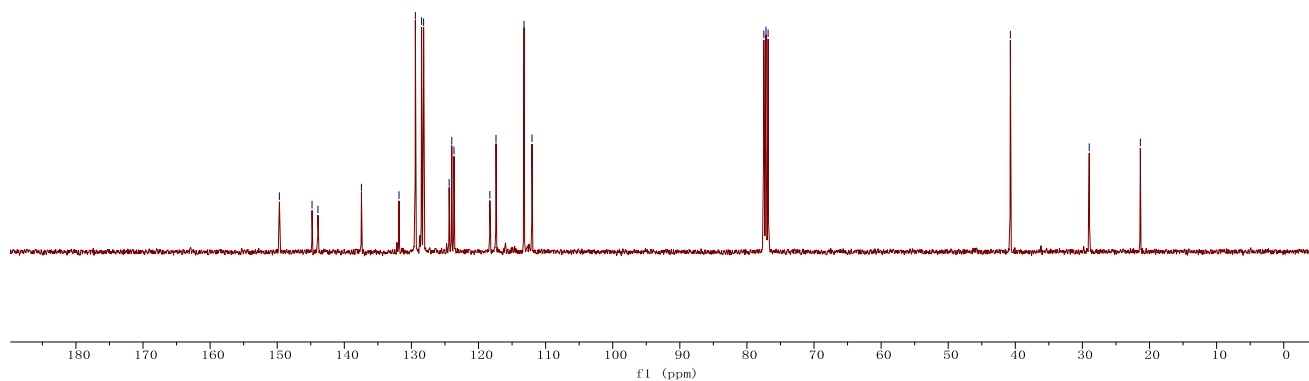

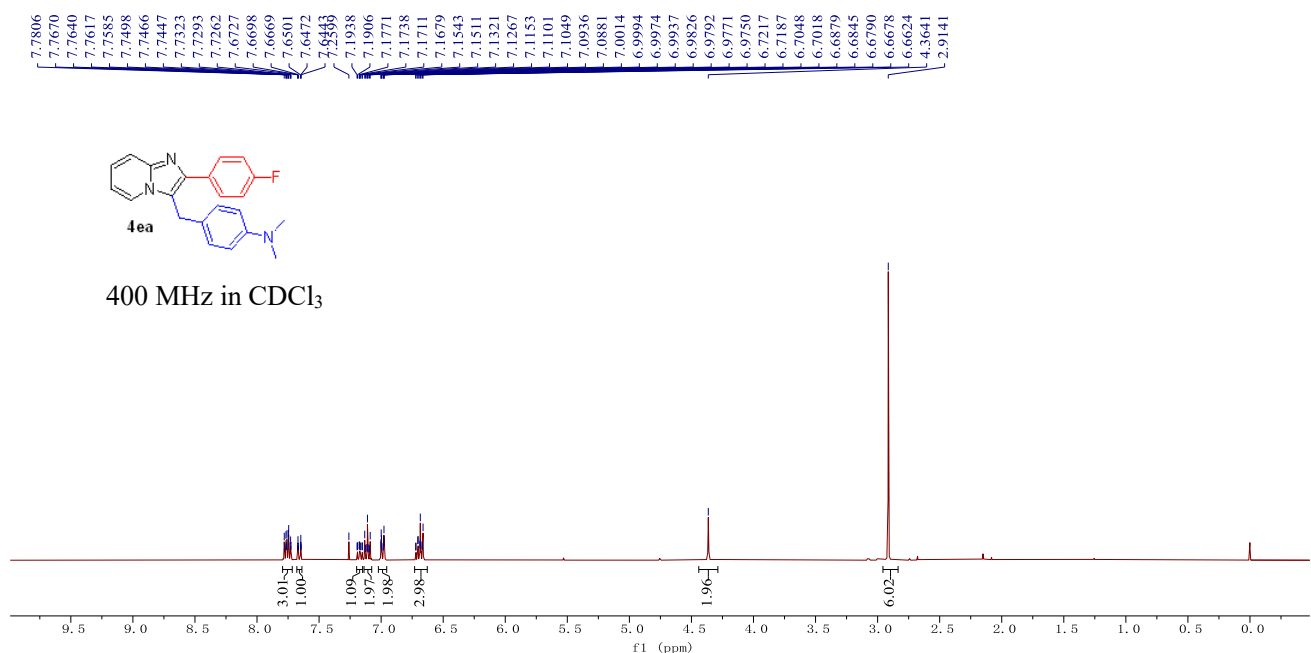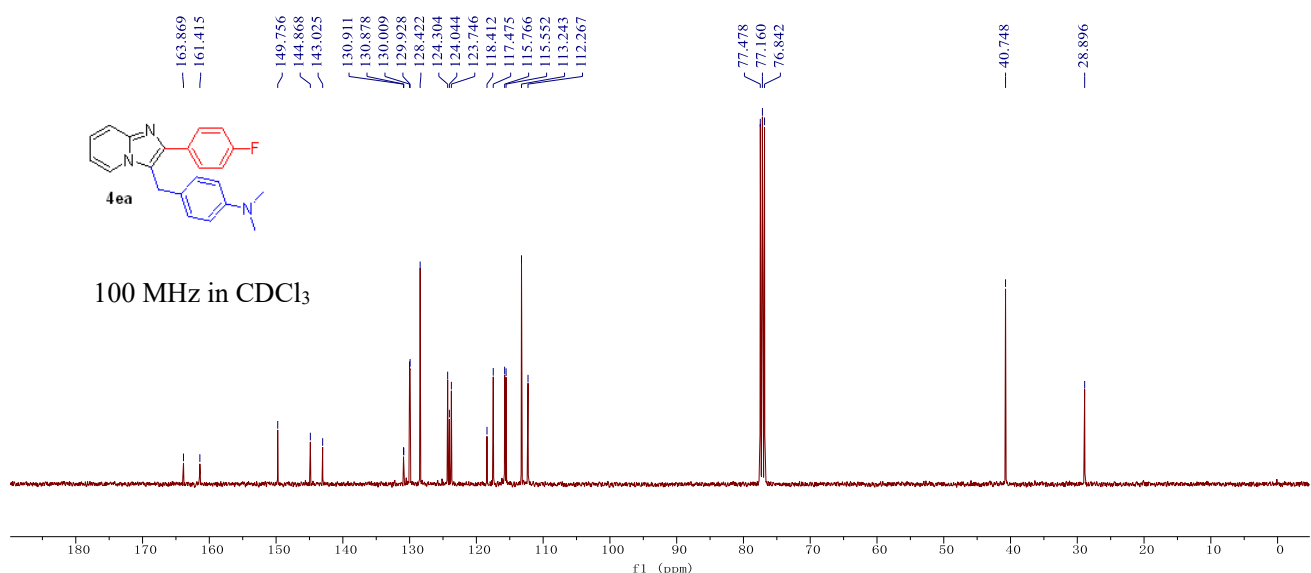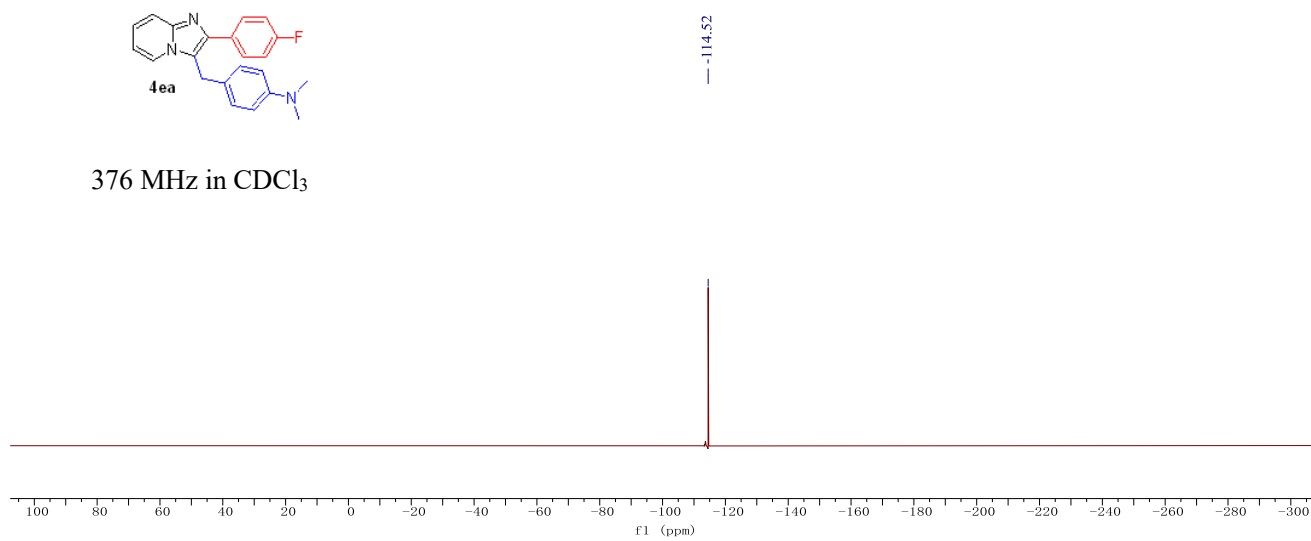

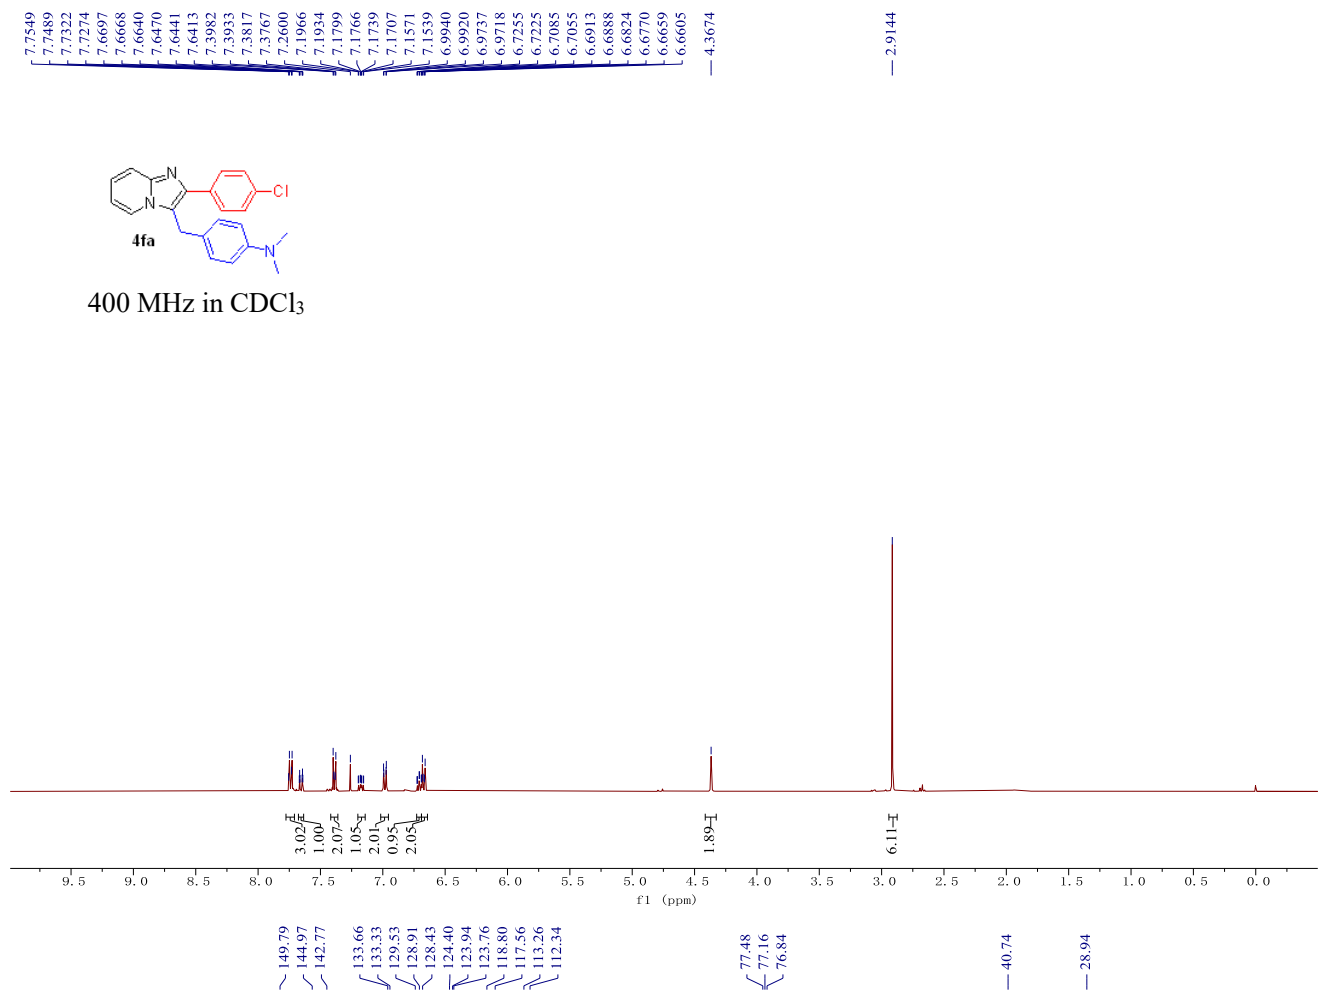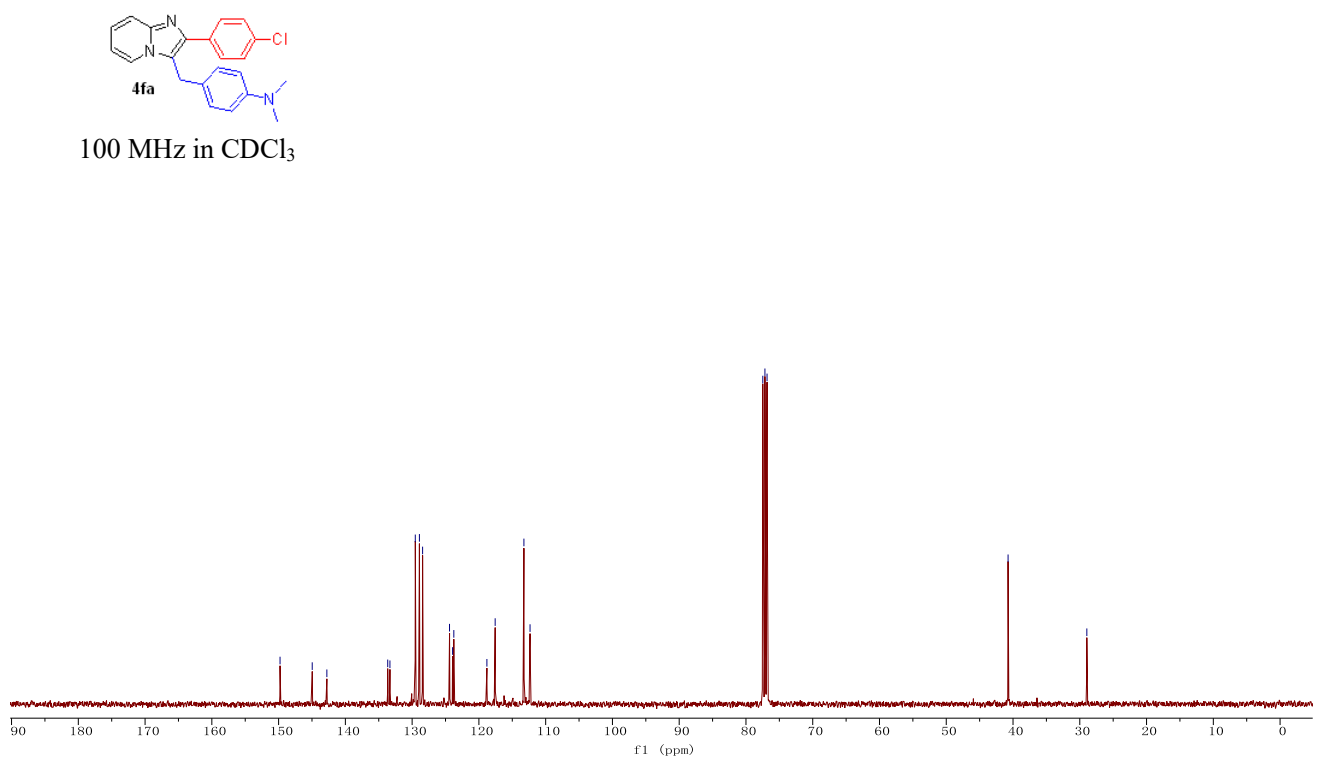

7.8751  
7.8736  
7.8686  
7.8644  
7.7654  
7.7624  
7.7593  
7.7479  
7.7451  
7.7423  
7.6727  
7.6503  
7.6396  
7.6345  
7.3347  
7.3331  
7.3217  
7.3182  
7.3163  
7.3119  
7.2601  
7.2020  
7.1988  
7.1852  
7.1818  
7.1791  
7.1760  
7.1625  
7.1593  
6.9996  
6.9793  
6.9773  
6.7291  
6.7122  
6.6920  
6.6833  
6.6613  
4.3872

2.9142

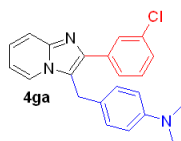

400 MHz in CDCl<sub>3</sub>

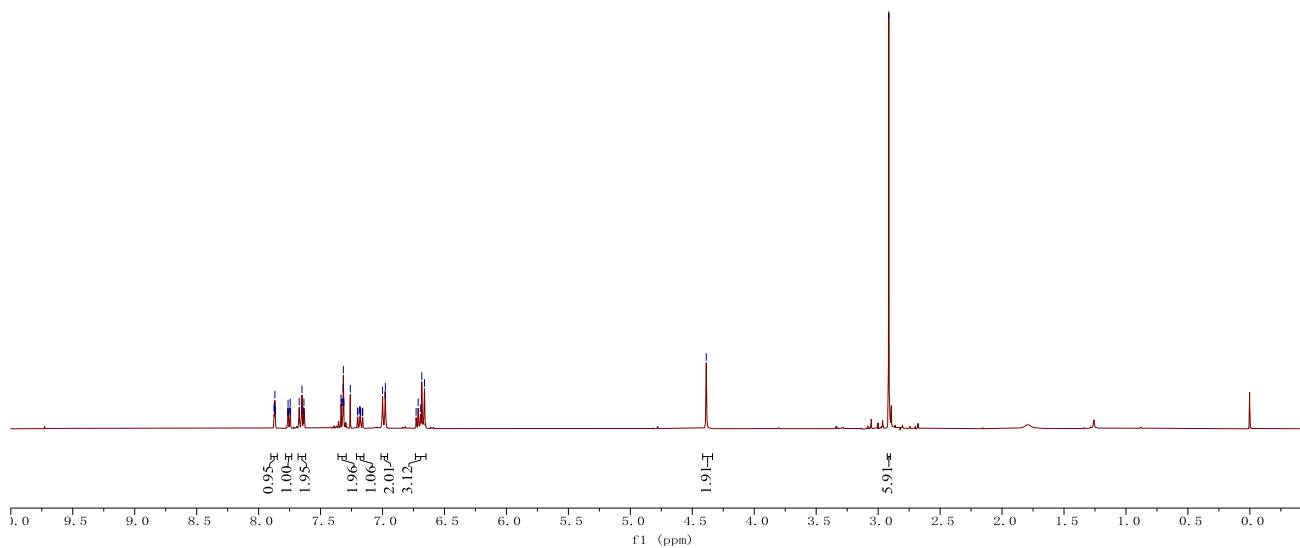

149.78  
144.96  
142.49  
136.71  
134.73  
129.91  
128.47  
128.40  
127.76  
126.30  
124.46  
123.93  
123.83  
119.18  
117.66  
113.27  
112.38

77.48  
77.16  
76.84

40.75

28.96

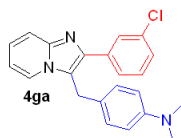

100 MHz in CDCl<sub>3</sub>

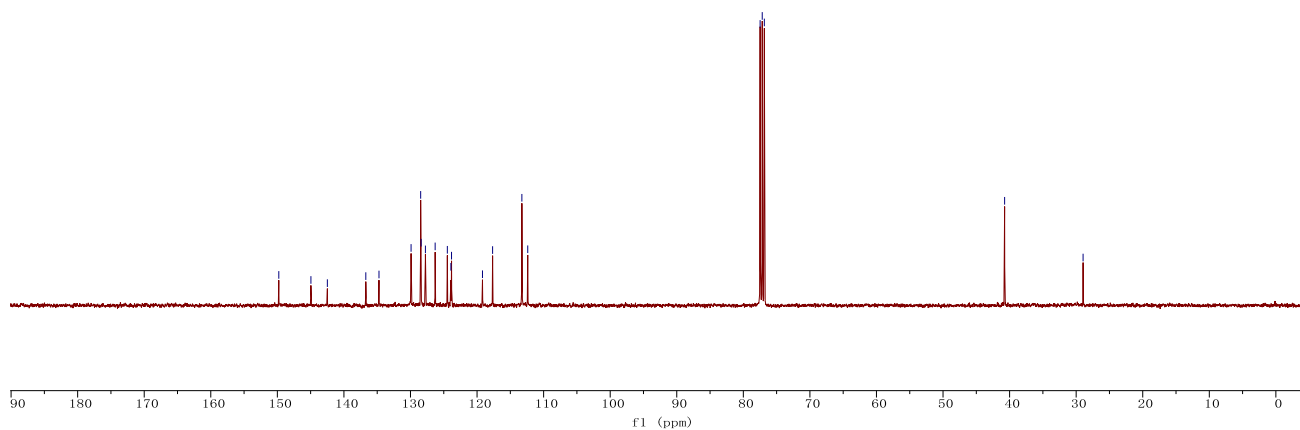

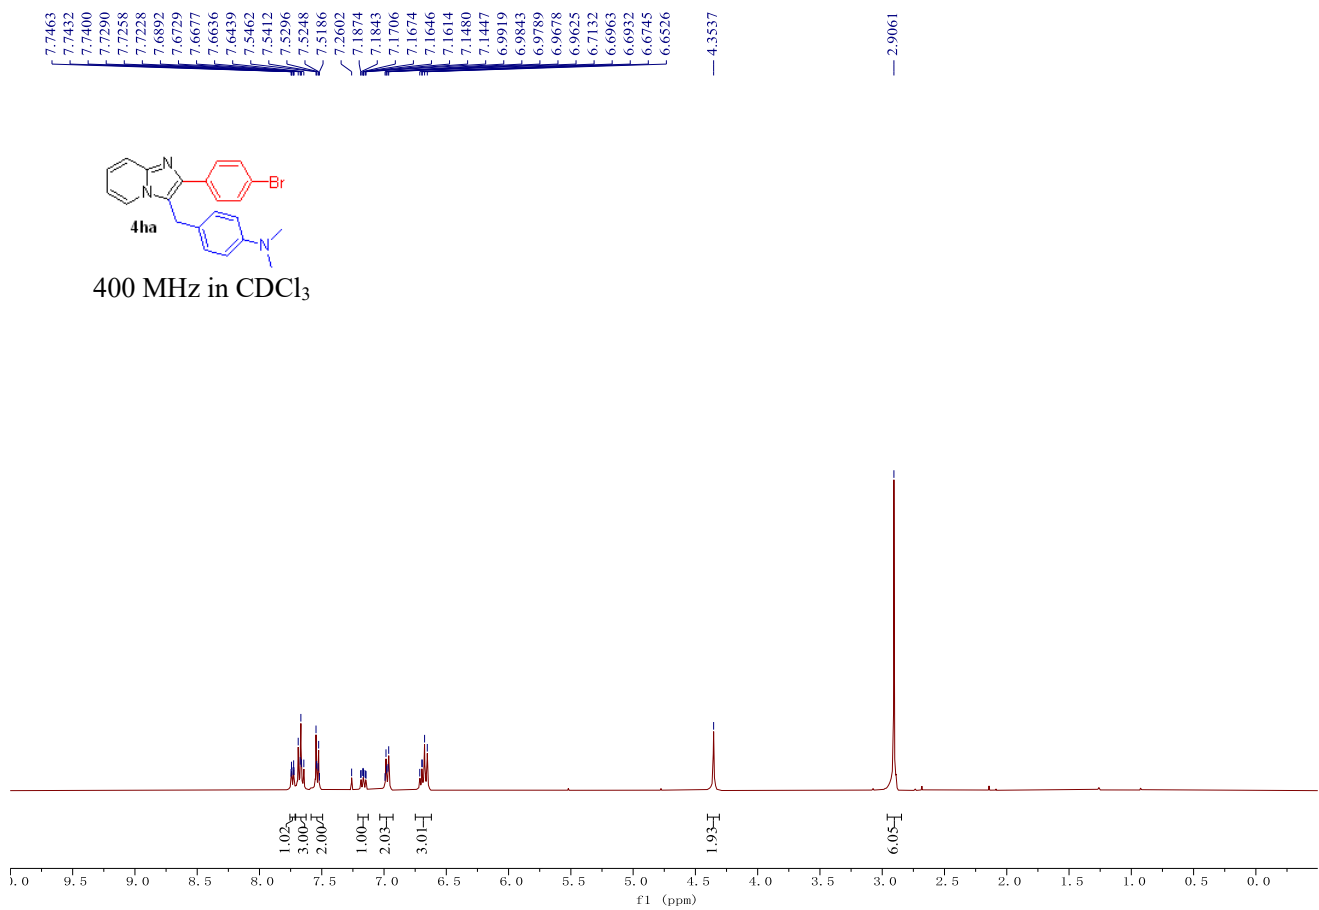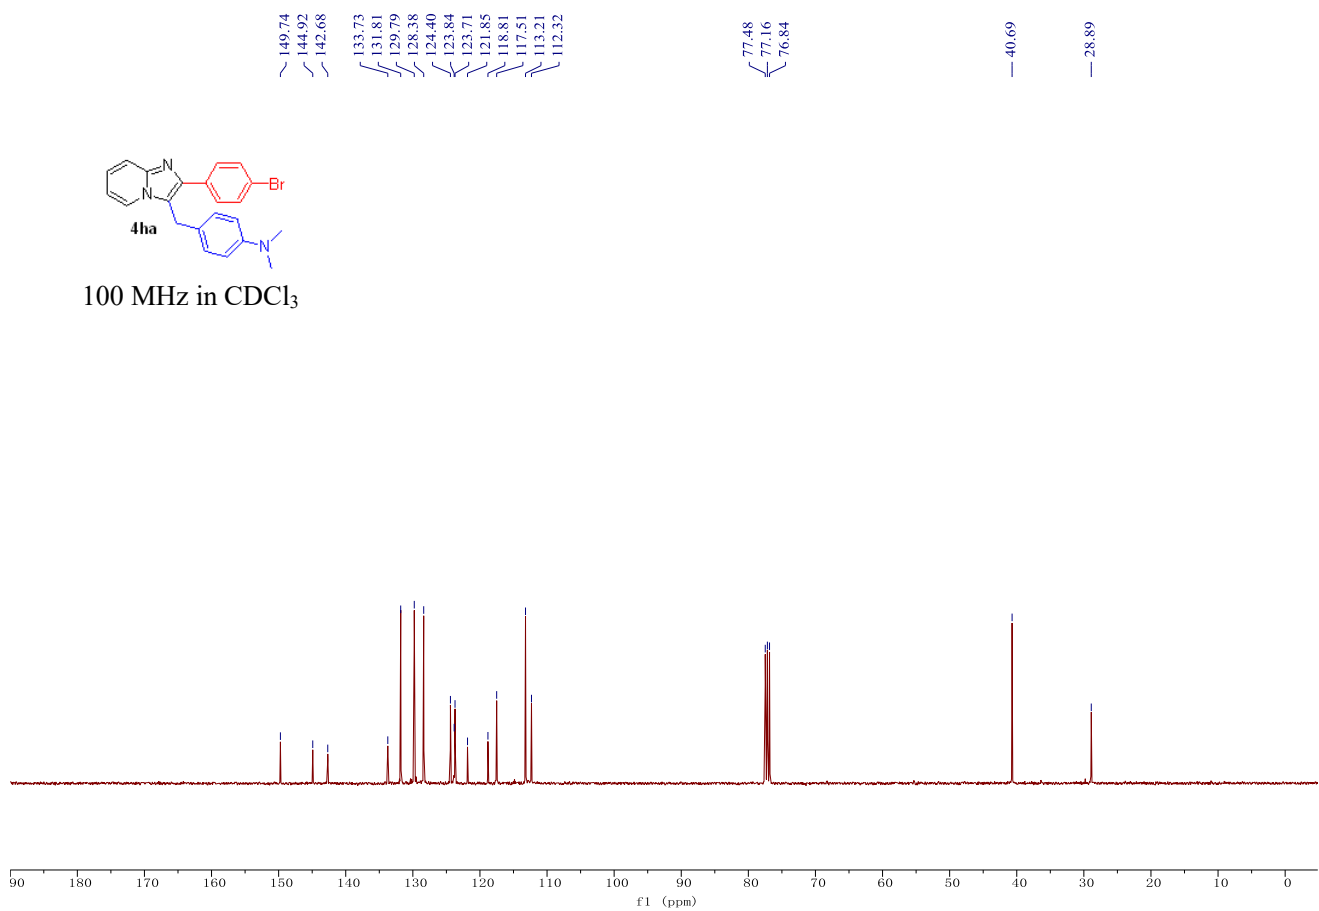

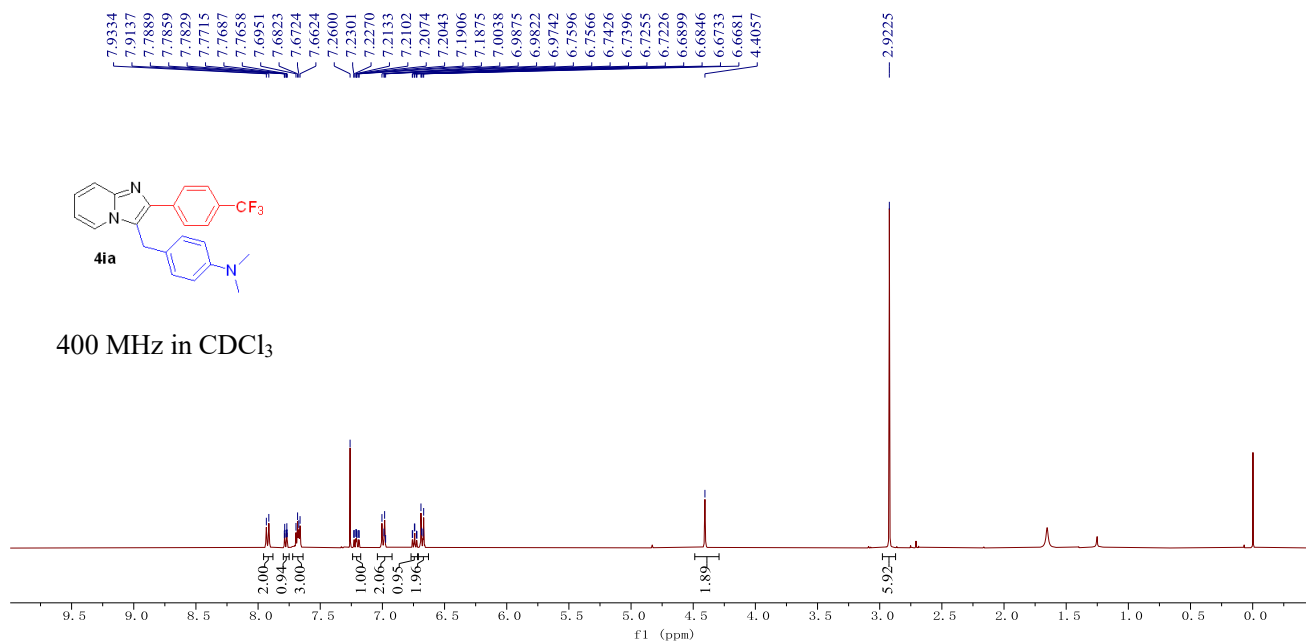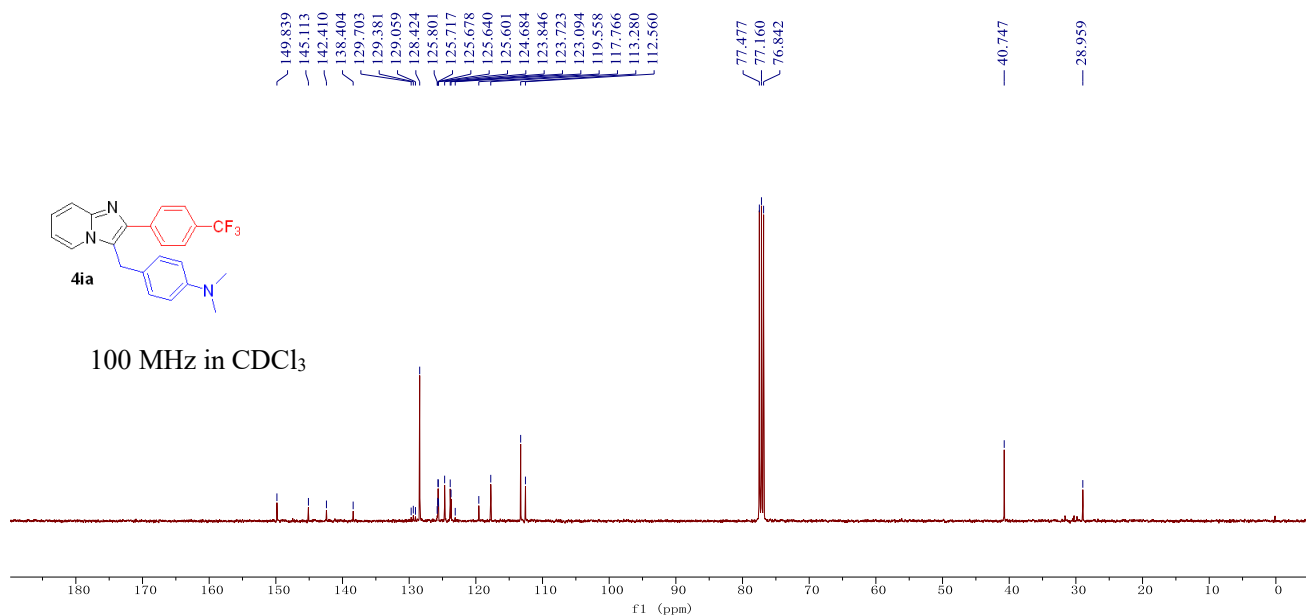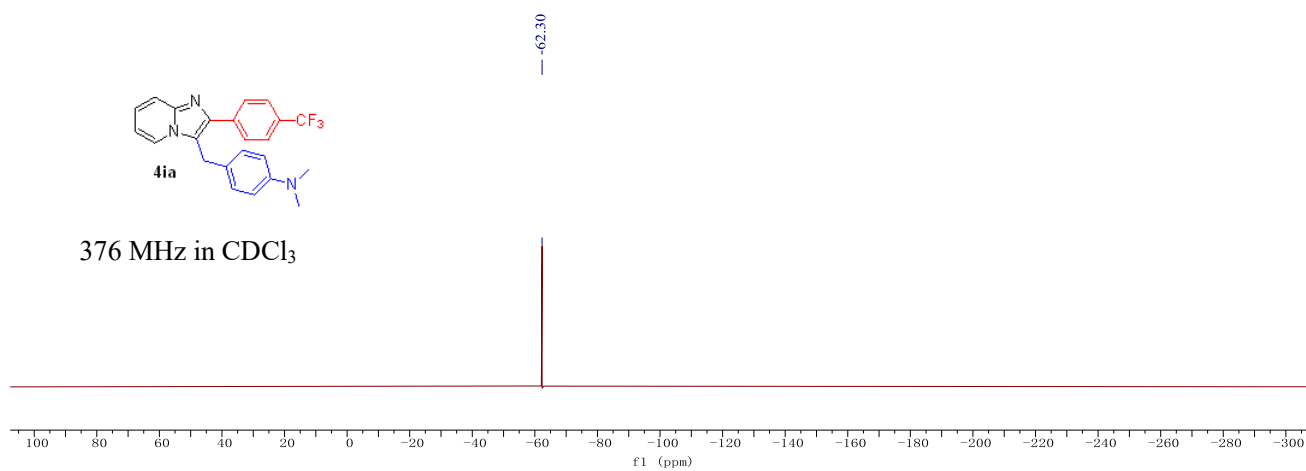

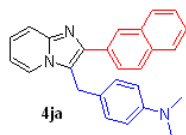

400 MHz in CDCl<sub>3</sub>

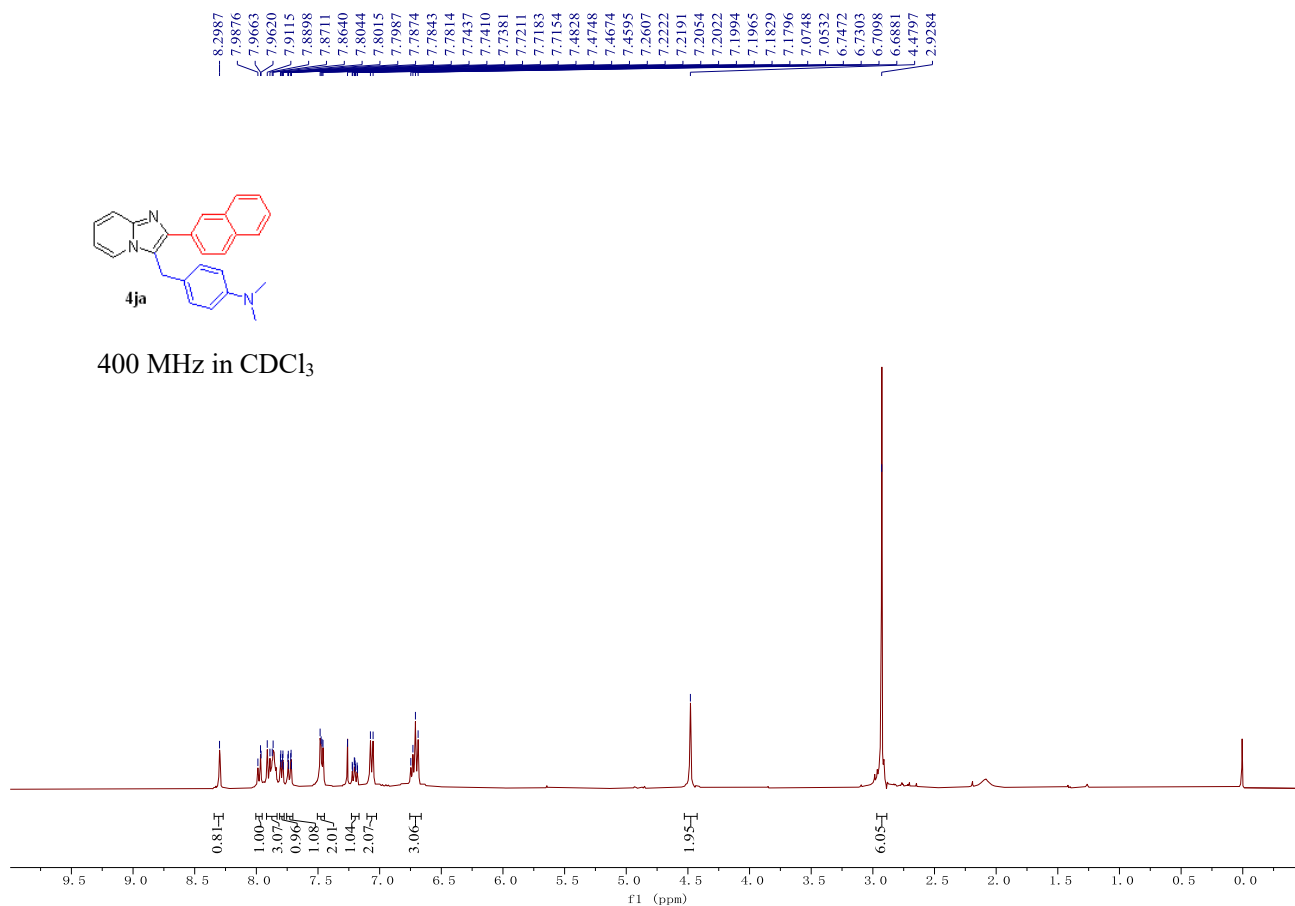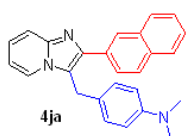

100 MHz in CDCl<sub>3</sub>

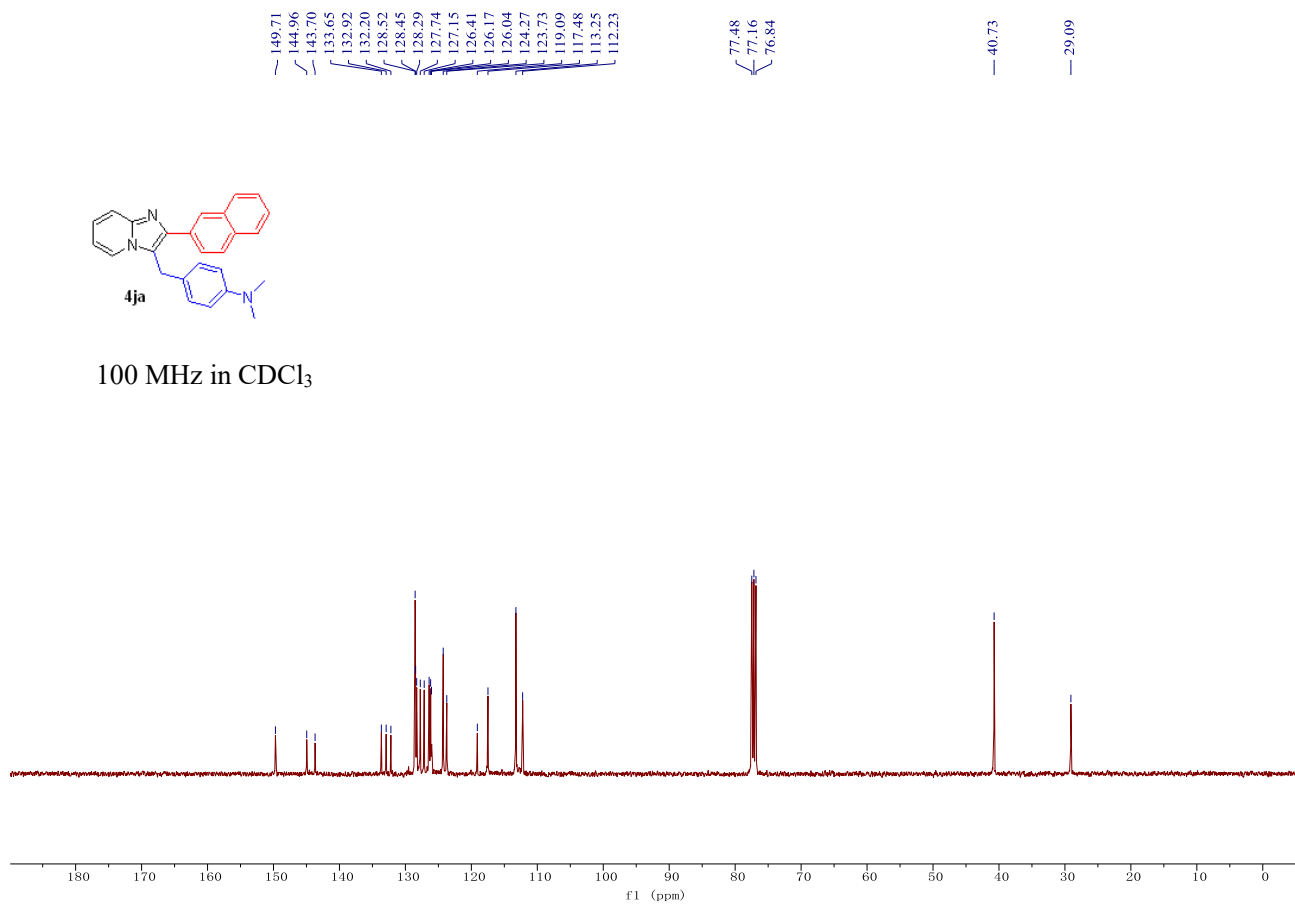

7.7596  
7.7566  
7.7536  
7.7424  
7.7393  
7.7362  
7.6461  
7.6433  
7.6406  
7.6235  
7.6206  
7.6178  
7.4304  
7.4276  
7.4215  
7.4186  
7.3434  
7.3406  
7.3306  
7.3278  
7.2600  
7.1593  
7.1561  
7.1426  
7.1395  
7.1367  
7.1333  
7.1198  
7.1165  
7.0930  
7.0841  
7.0804  
7.0711  
7.0282  
7.0240  
7.0062  
6.6973  
6.6943  
6.6802  
6.6771  
6.6600  
6.6381  
4.4360  
2.8908

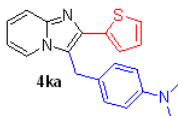

400 MHz in CDCl<sub>3</sub>

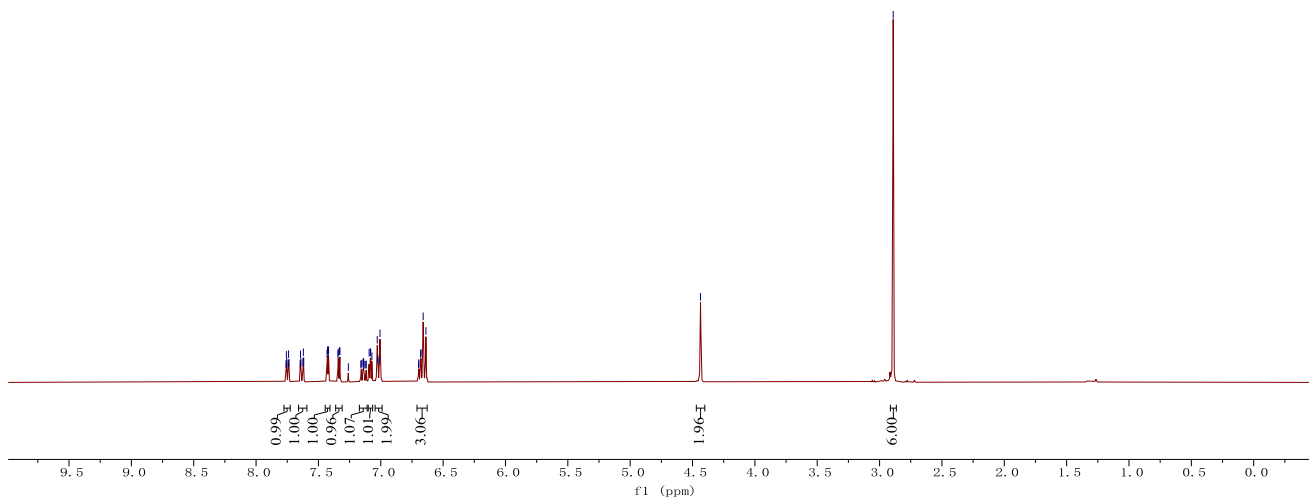

149.71  
144.77  
138.31  
137.85  
128.53  
127.79  
125.47  
124.55  
124.37  
123.83  
123.45  
118.32  
117.31  
113.16  
112.29  
77.48  
77.16  
76.84  
40.70  
28.95

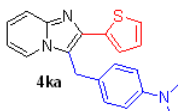

100 MHz in CDCl<sub>3</sub>

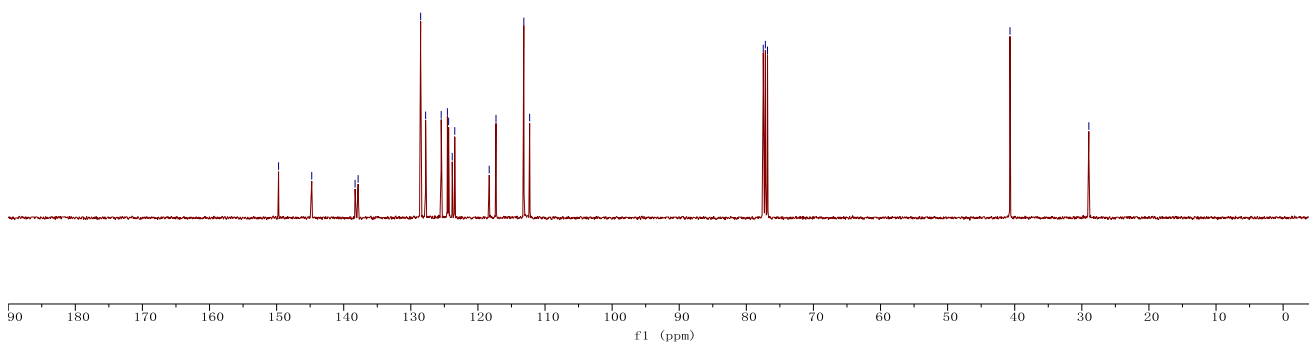



7.8037  
7.8000  
7.7825  
7.7798  
7.5475  
7.5458  
7.5288  
7.5271  
7.4340  
7.4317  
7.4138  
7.4136  
7.3946  
7.3412  
7.3378  
7.3194  
7.3010  
7.2600  
7.2071  
7.0251  
7.0216  
7.0105  
7.0051  
6.9512  
6.9463  
6.6884  
6.6786  
6.6675  
6.6622  
6.4167  
6.4105  
6.3981  
6.3919  
— 4.3443  
— 3.8472  
— 2.9096

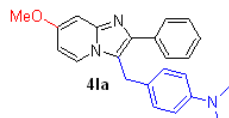

400 MHz in CDCl<sub>3</sub>

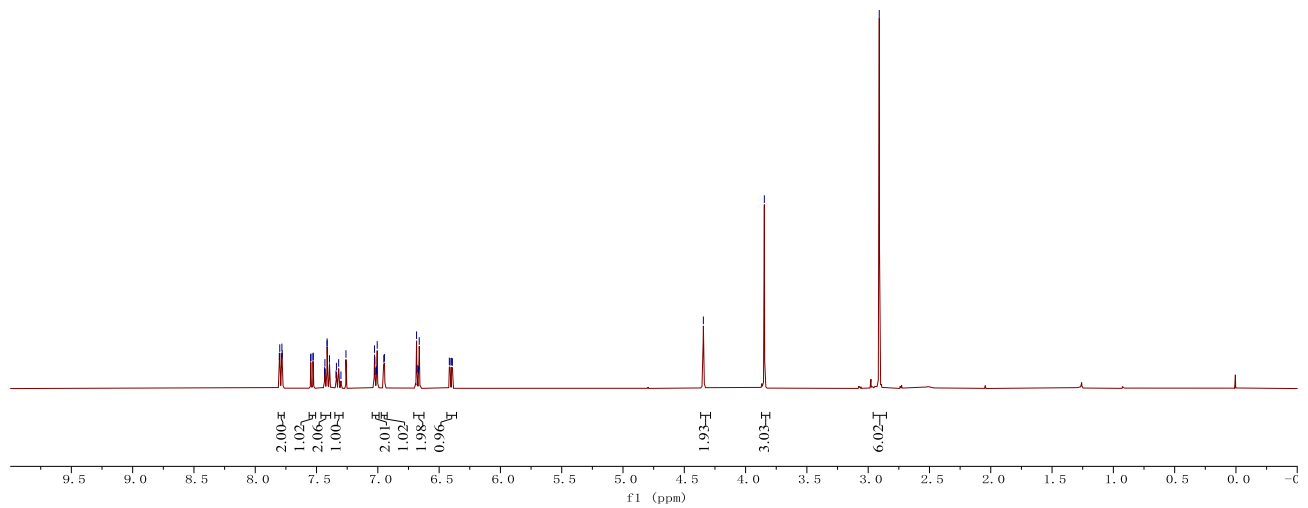

157.73  
149.66  
146.19  
143.10  
134.89  
128.64  
128.45  
128.02  
127.46  
124.55  
124.22  
117.35  
113.20  
107.08  
— 94.72  
77.48  
77.16  
76.84  
55.54  
40.75  
28.89

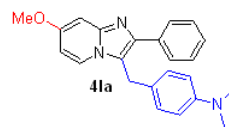

100 MHz in CDCl<sub>3</sub>

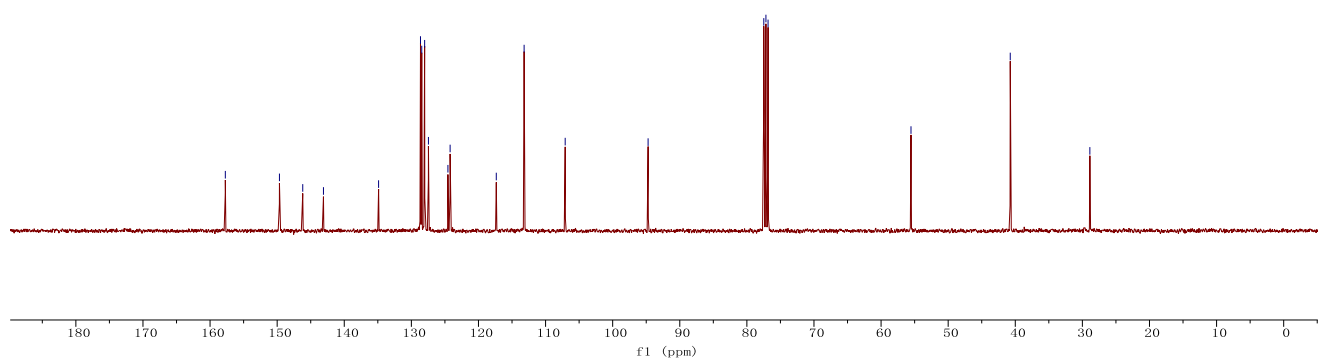

7.8166  
7.8128  
7.7956  
7.7924  
7.6263  
7.6091  
7.4390  
7.4209  
7.4021  
7.4003  
7.3529  
7.3498  
7.3314  
7.3128  
7.2600  
7.0185  
7.0165  
6.9983  
6.9901  
6.9701  
6.9530  
6.6909  
6.6833  
6.6614  
6.6538  
6.6324  
6.6154  
6.5984

— 4.3715

— 2.9127  
— 2.6930

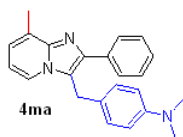

400 MHz in CDCl<sub>3</sub>

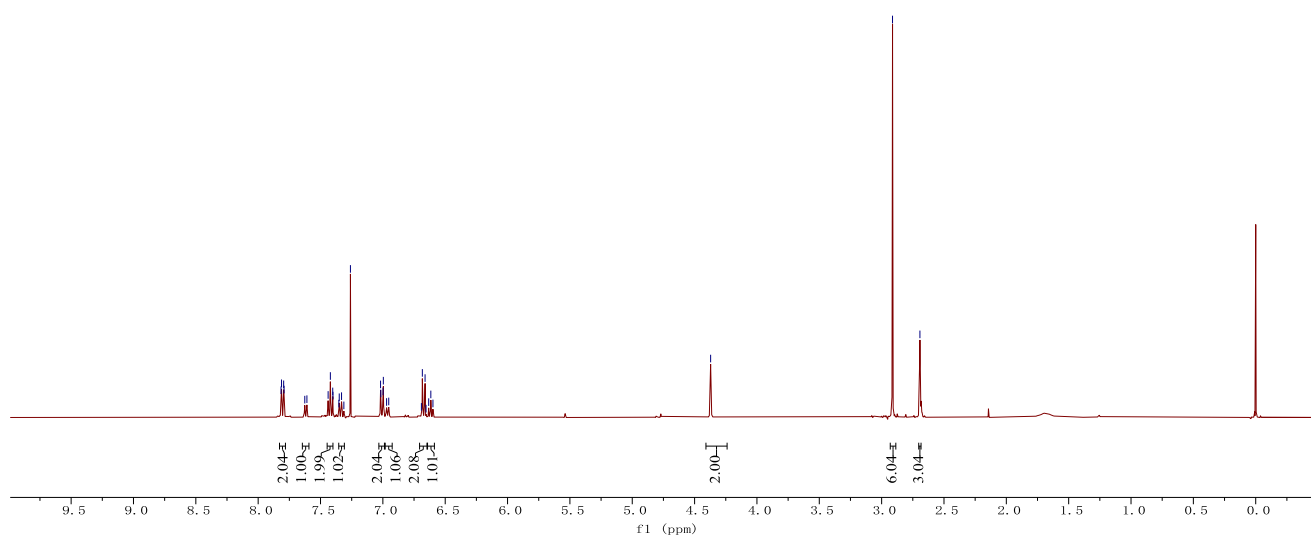

149.65  
145.34  
143.54  
135.09  
128.68  
128.53  
127.55  
127.45  
124.66  
122.91  
121.63  
118.94  
113.22  
112.13

77.48  
77.16  
76.85

— 40.79  
— 29.08  
— 17.32

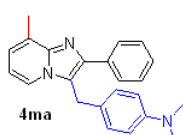

100 MHz in CDCl<sub>3</sub>

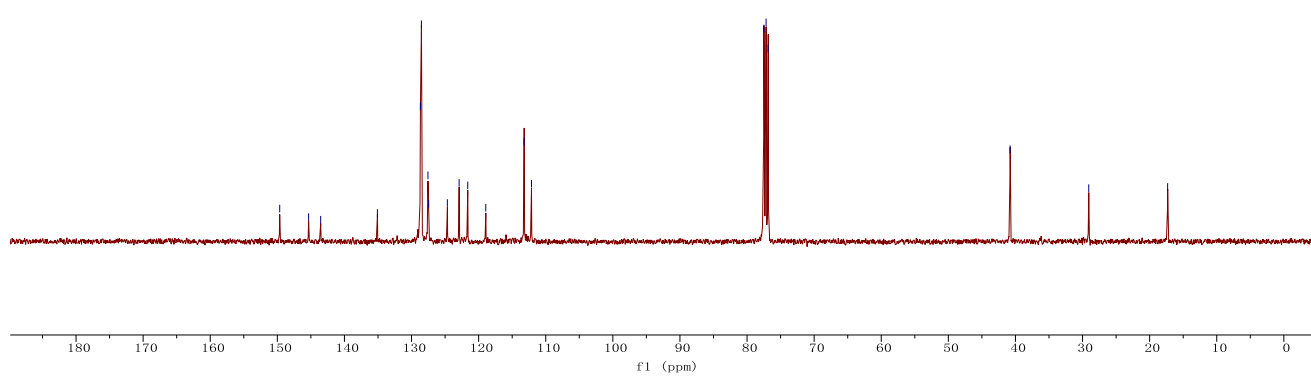

7.8161  
7.8124  
7.7951  
7.7922  
7.6118  
7.5944  
7.4361  
7.4279  
7.4182  
7.3986  
7.3486  
7.3456  
7.3270  
7.3085  
7.2605  
7.0144  
7.0093  
6.9982  
6.6818  
6.6764  
6.6655  
6.6601  
6.5190  
6.5148  
6.5016  
6.4974

— 4.3619

— 2.9070

— 2.3727

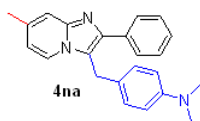

400 MHz in CDCl<sub>3</sub>

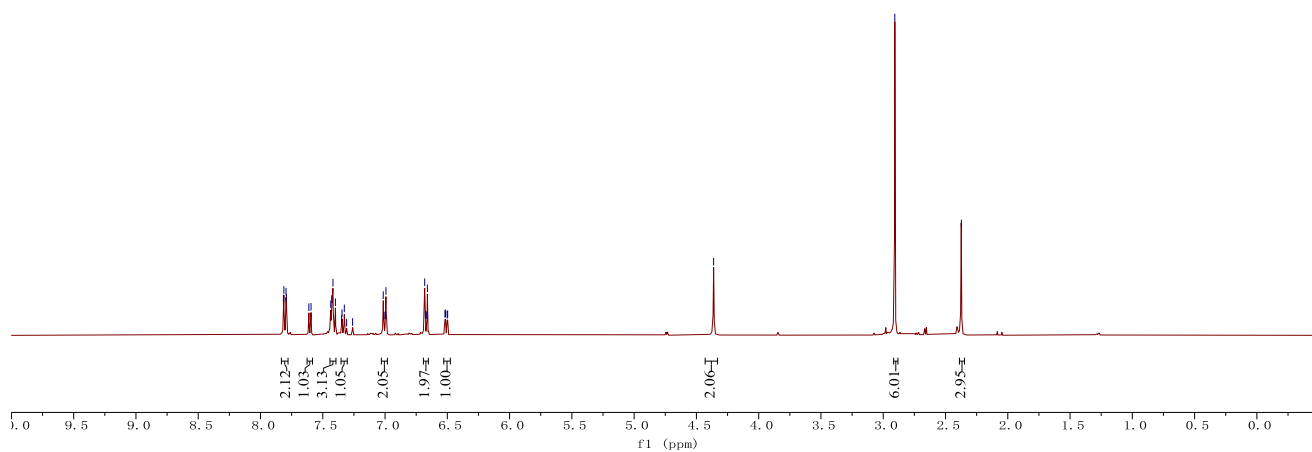

149.65  
145.28  
143.44  
134.99  
134.90  
128.62  
128.44  
128.22  
127.52  
124.52  
122.94  
117.94  
115.86  
114.72  
113.19

77.48  
77.16  
76.84

— 40.72

— 28.90

— 21.38

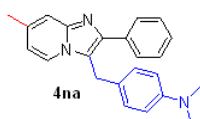

100 MHz in CDCl<sub>3</sub>

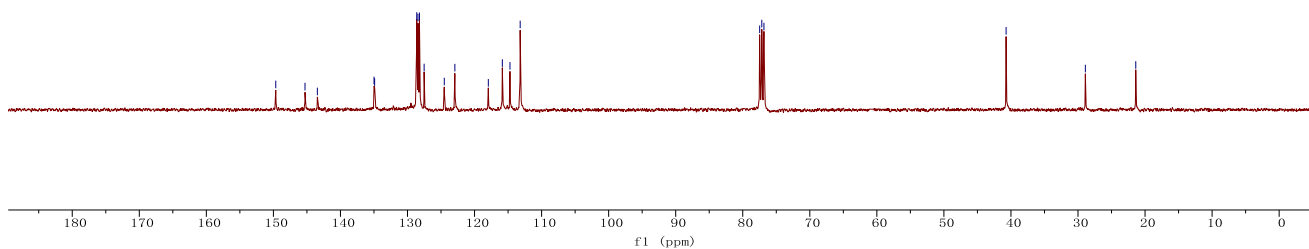

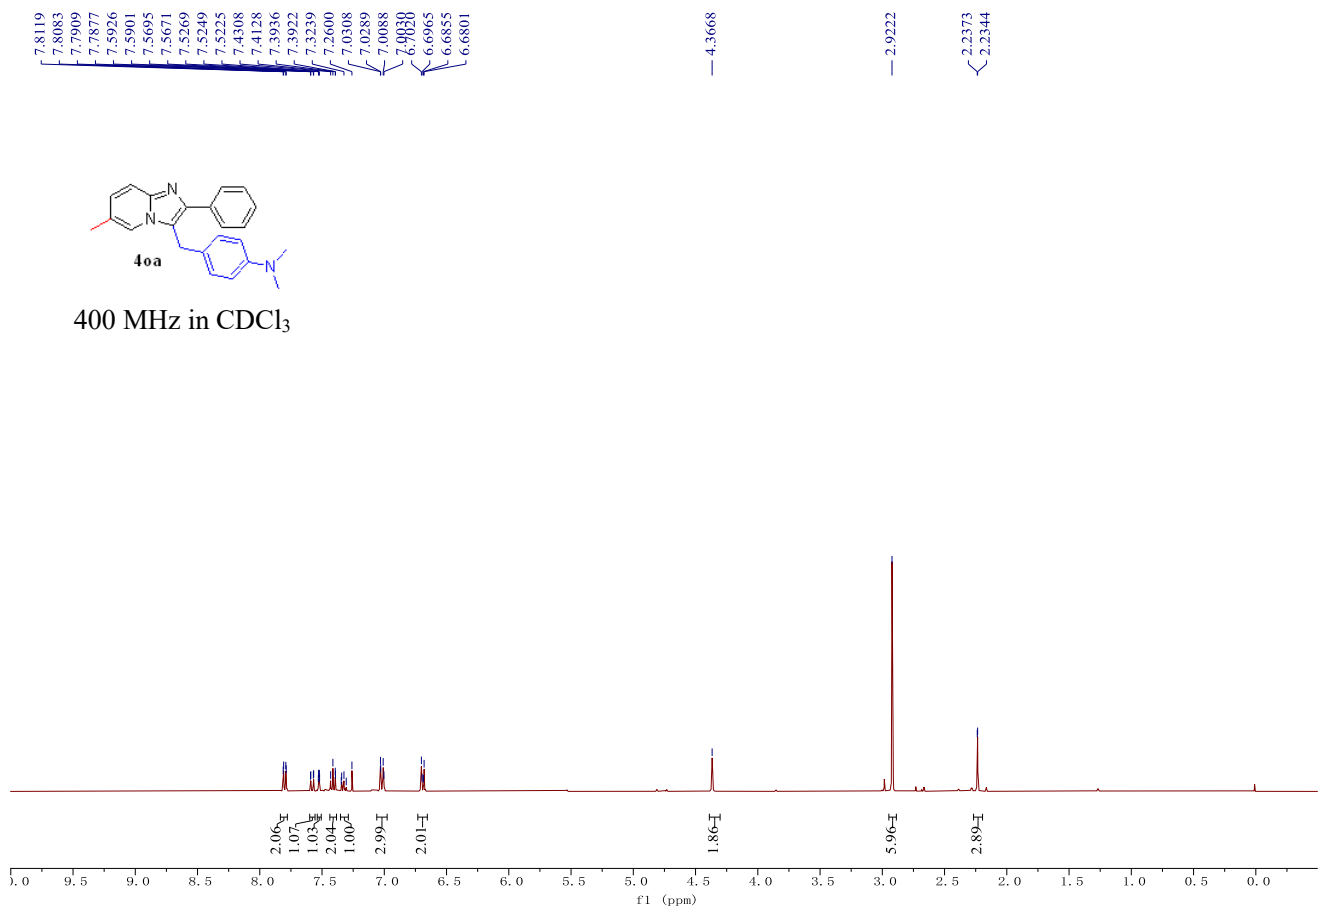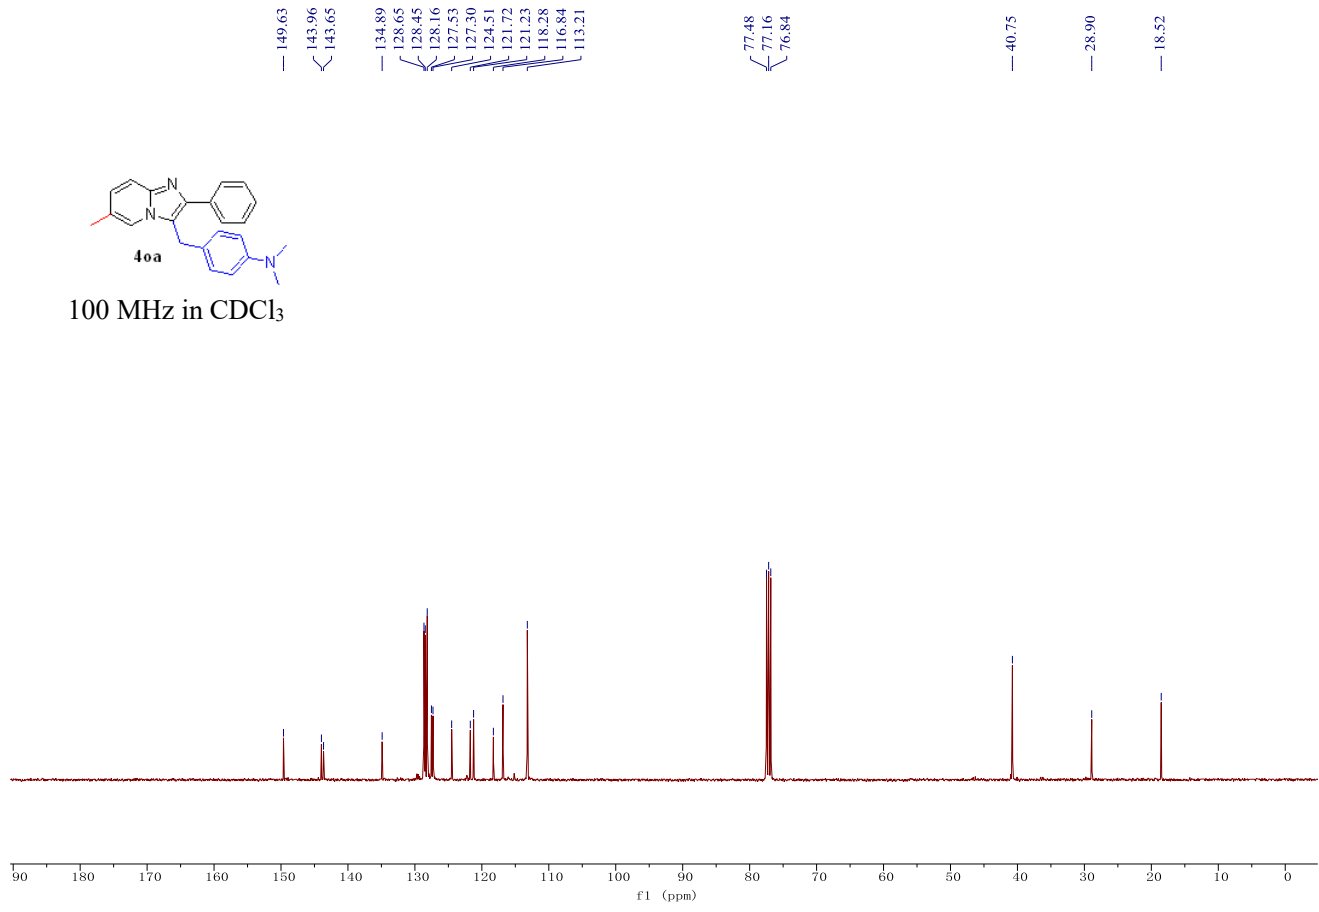

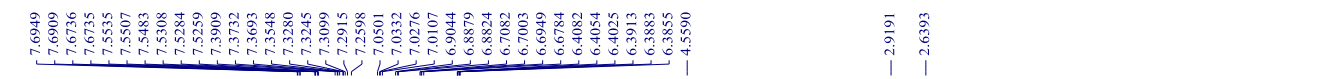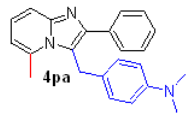

400 MHz in CDCl<sub>3</sub>

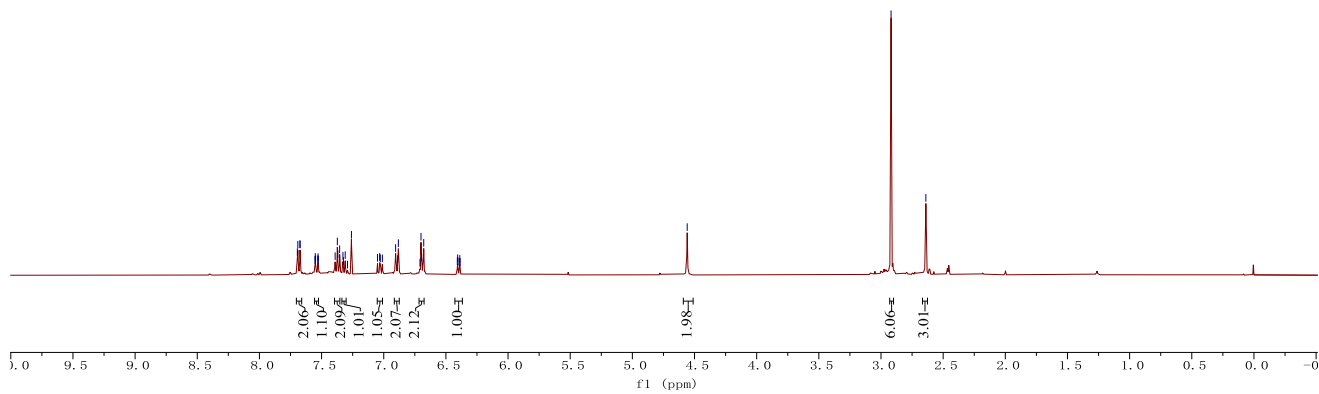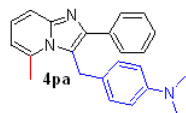

100 MHz in CDCl<sub>3</sub>

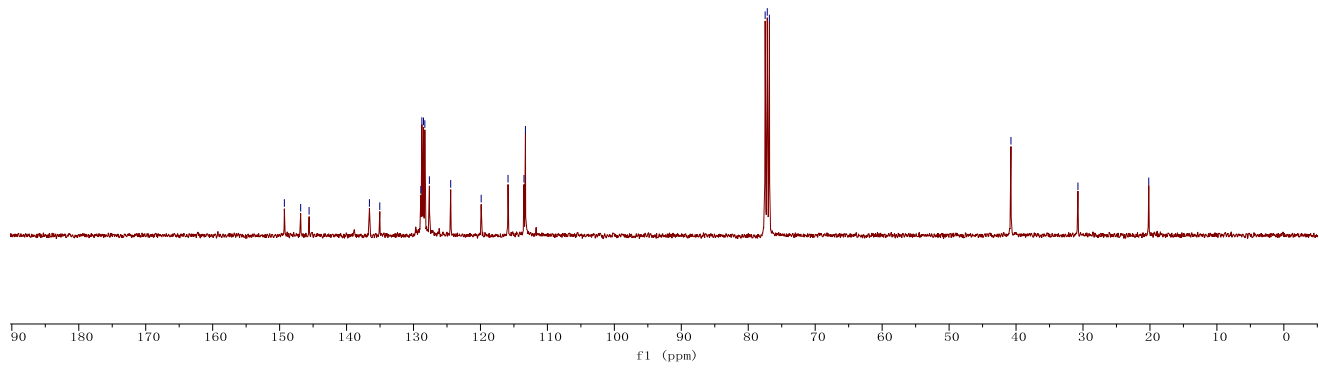

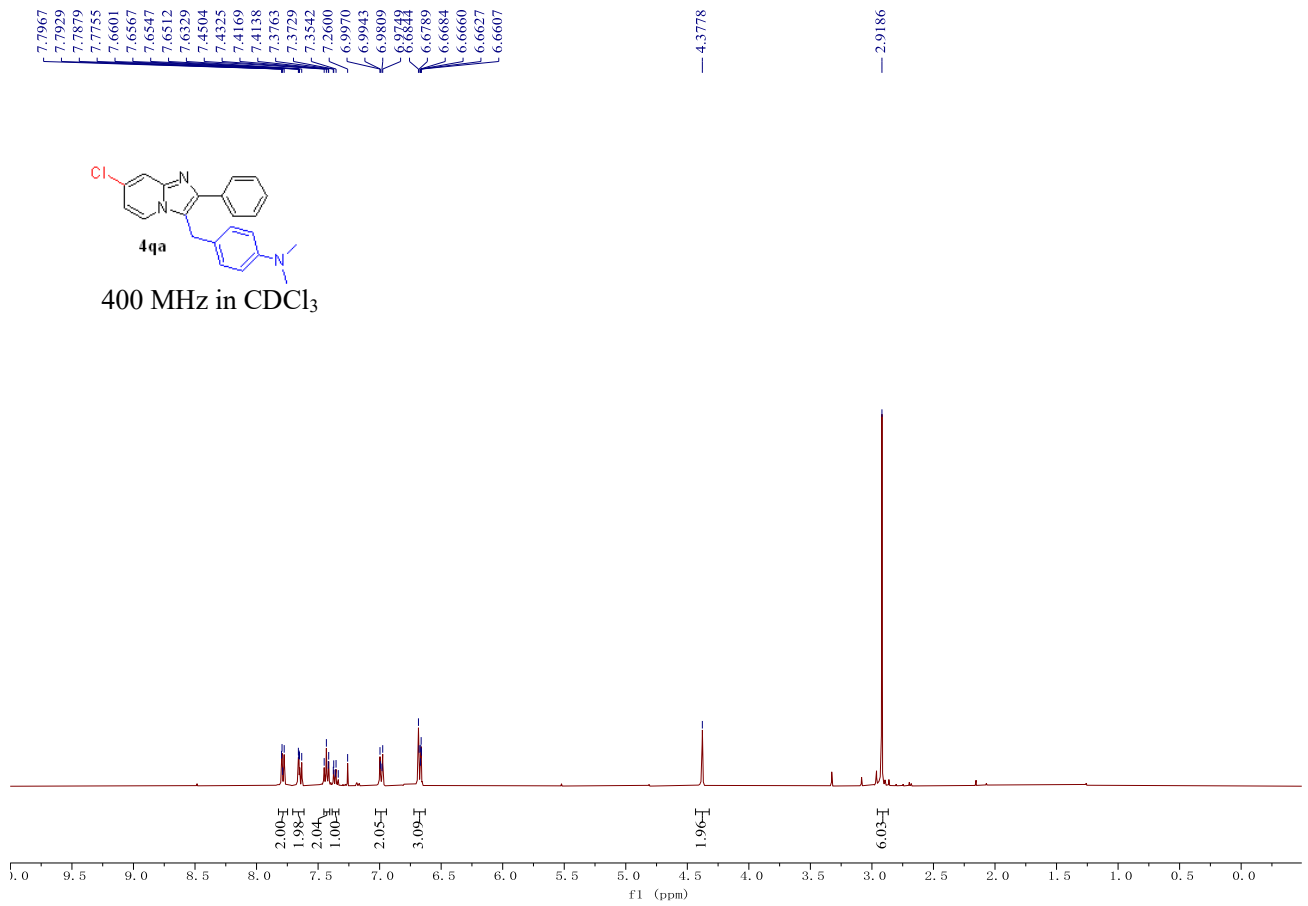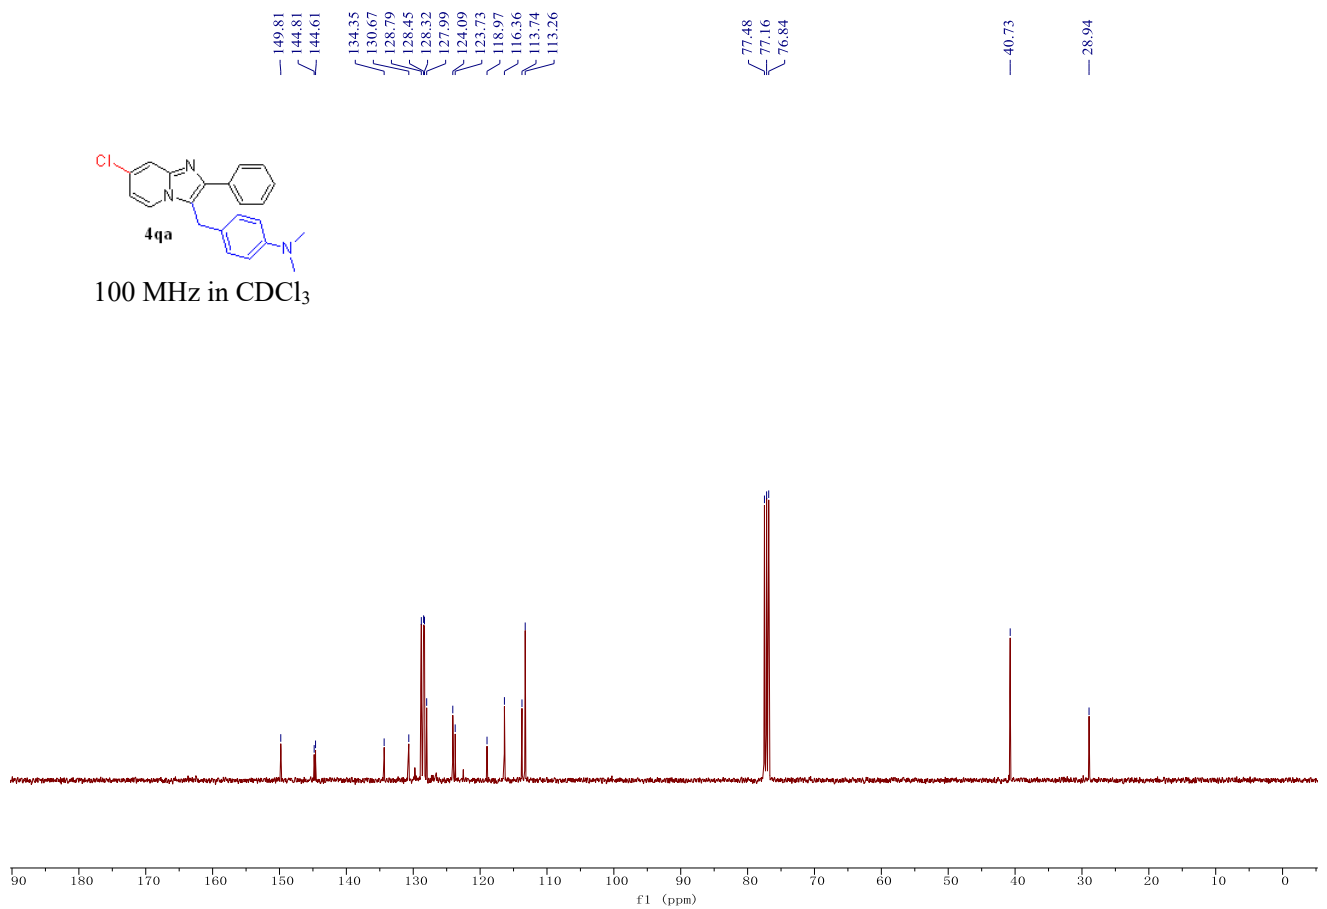

7.8391  
7.8353  
7.8221  
7.8206  
7.8178  
7.8148  
7.7769  
7.7739  
7.7710  
7.7596  
7.7567  
7.7538  
7.6866  
7.6838  
7.6809  
7.6638  
7.6609  
7.6581  
7.4490  
7.4310  
7.4121  
7.3596  
7.3413  
7.2602  
7.1829  
7.1797  
7.1661  
7.1629  
7.1601  
7.1570  
7.1435  
7.1403  
6.9900  
6.9732  
6.9676  
6.7136  
6.7105  
6.6967  
6.6936  
6.6796  
6.6246  
6.6079  
6.6027  
3.3338  
3.3328  
3.3251  
3.3074  
3.2899

1.1546  
1.1371  
1.1194

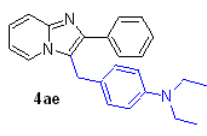

400 MHz in CDCl<sub>3</sub>

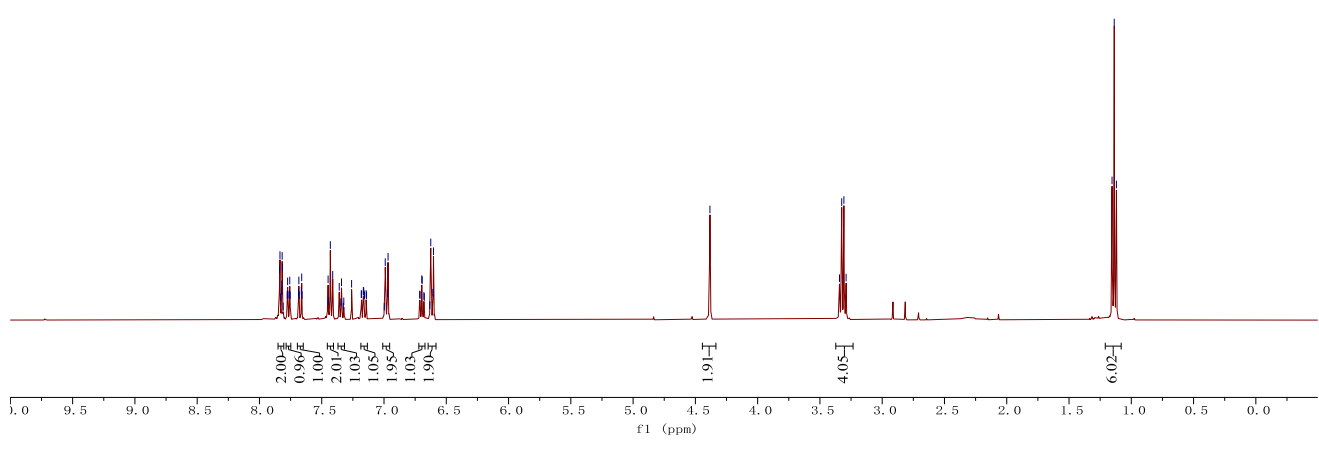

146.87  
144.87  
143.85  
134.80  
128.69  
128.34  
127.68  
124.09  
123.84  
122.91  
118.74  
117.48  
112.34  
112.10

77.48  
77.16  
76.84

44.42

28.92

12.67

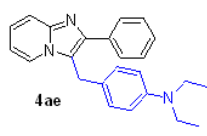

100 MHz in CDCl<sub>3</sub>

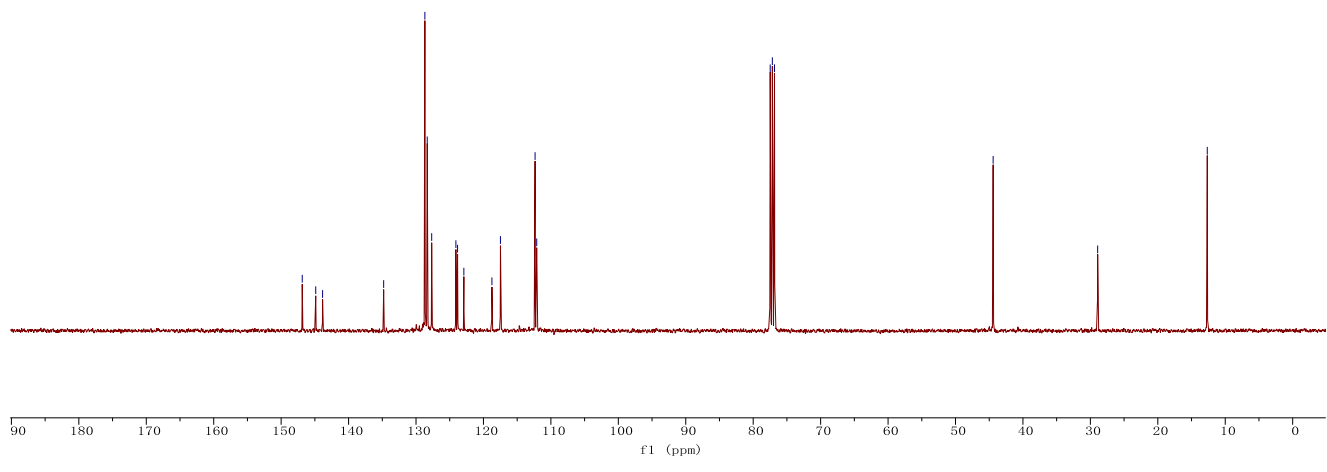

7.7676  
7.7626  
7.7502  
7.7069  
7.6887  
7.6863  
7.6738  
7.4322  
7.4142  
7.4106  
7.3949  
7.3478  
7.3295  
7.2033  
7.2006  
7.1865  
7.1831  
7.1800  
7.1773  
7.1639  
7.1596  
6.7269  
6.7129  
6.7101  
6.6953  
6.6929  
6.6269  
6.6198  
6.5085  
6.4872  
6.3592  
6.3523  
6.3379  
6.3308

4.2711

3.3412  
3.3237  
3.3059  
3.2883

2.3947

1.1595  
1.1420  
1.1242

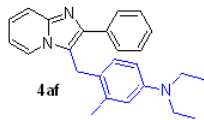

400 MHz in CDCl<sub>3</sub>

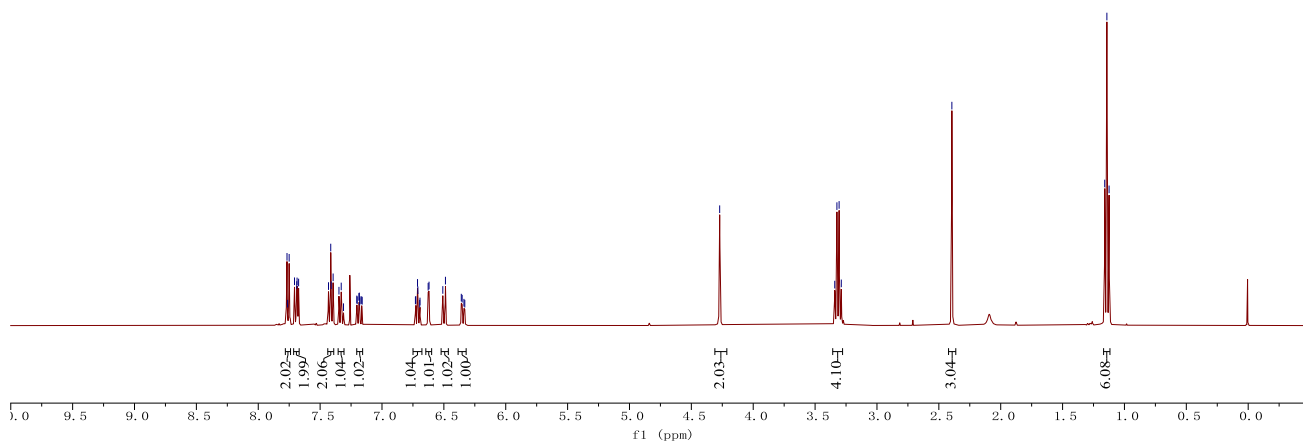

146.89  
144.93  
144.12  
137.23  
134.76  
128.70  
128.29  
127.79  
127.66  
124.09  
123.81  
121.05  
118.46  
117.50  
114.07  
112.17  
109.77

77.48  
77.16  
76.84

44.34

26.79

20.54

12.75

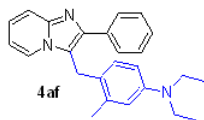

100 MHz in CDCl<sub>3</sub>

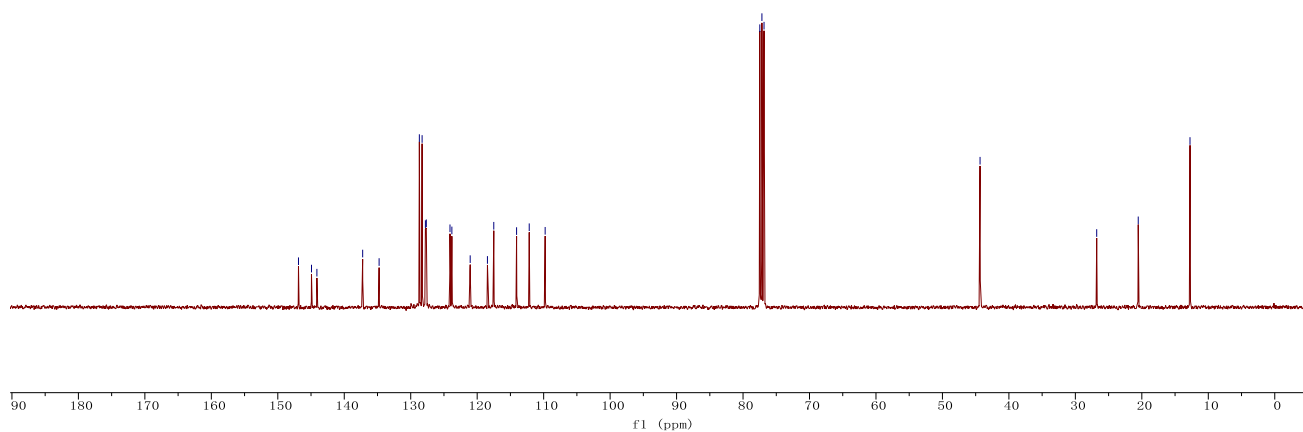



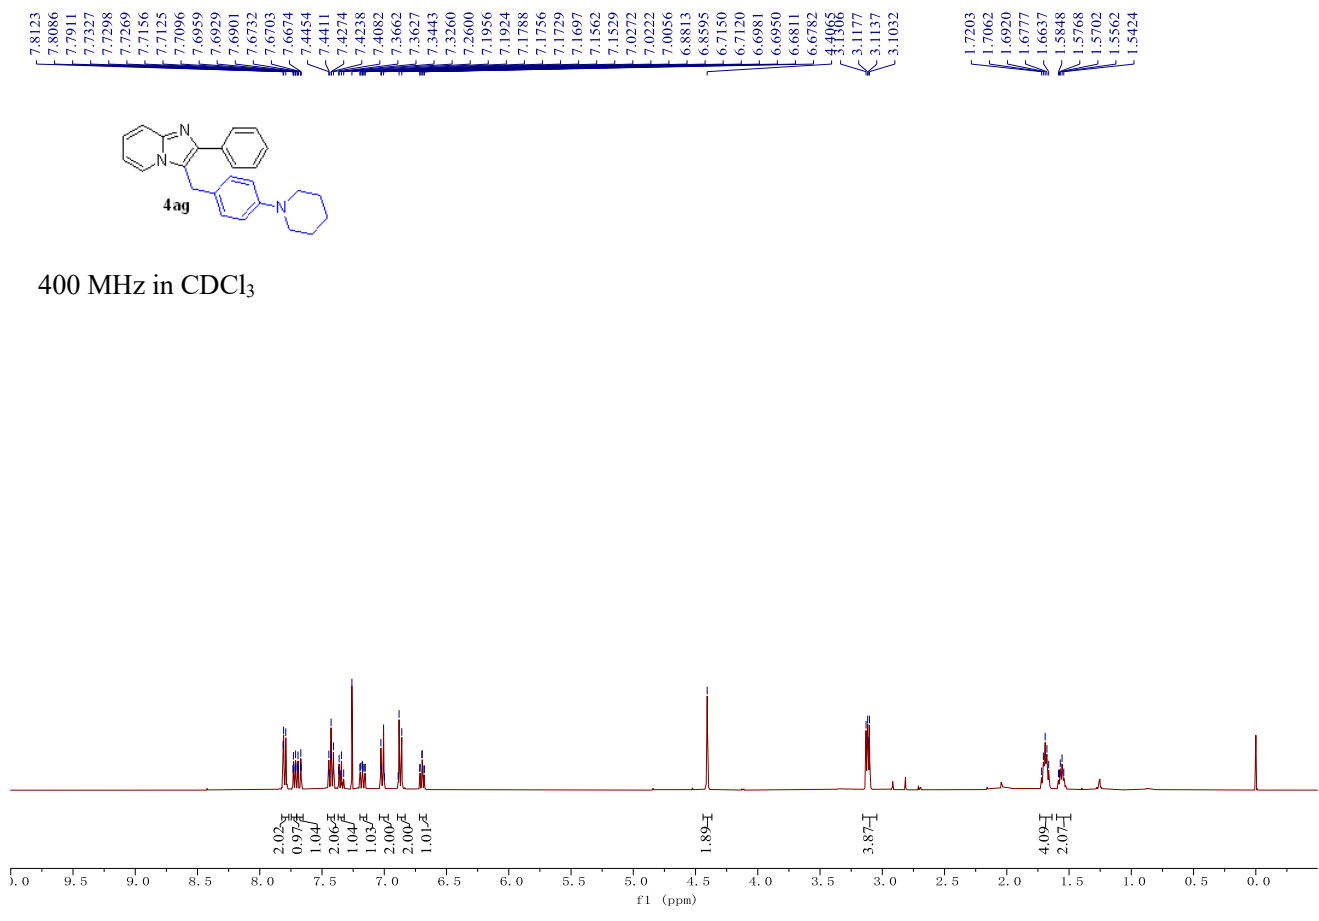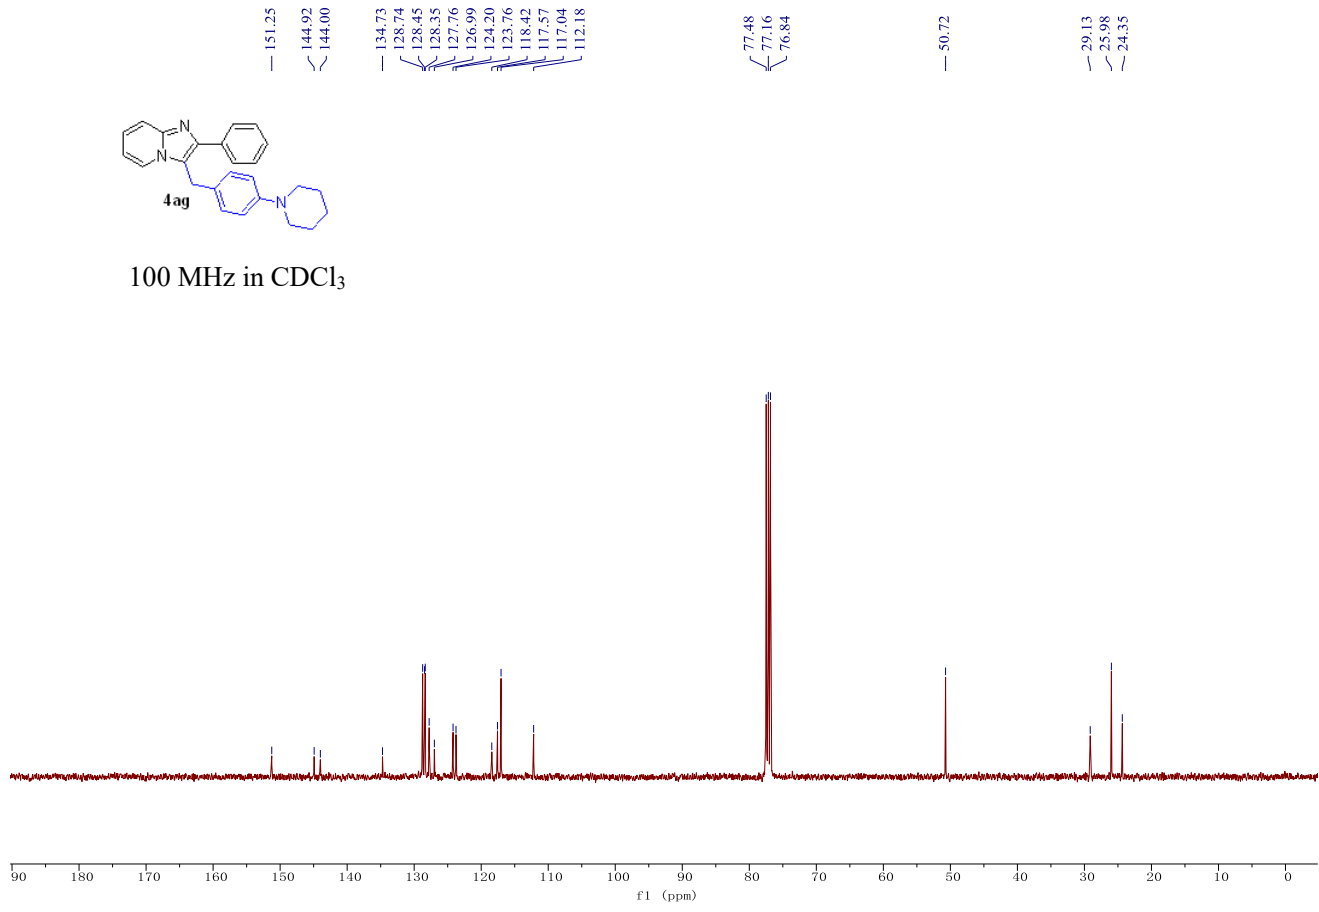

Supplement: d2gc03464f1.pdf [file d2gc03464f1.pdf]
